# Supplementary material for: Viral-induced alternative splicing of host genes promotes influenza replication
Source: eLife. 2020 Dec 3;9:e55500. doi: 10.7554/eLife.55500 (PMC7735754; doi:10.7554/eLife.55500)
Supplement: Supplementary file 1. — Fold change (log2) and p-values for genes are given at 6 and 12 hr post infection with IAV (page 1 and 2, DE_6HPI and DE_12HPI), or after depletion of hnRNP K by shRNA (page 3, DE_shHNRNPK). [file elife-55500-supp1.xlsx]

## Sheet: DE_6HPI
ensembl_gene_id	hgnc_symbol	log2FoldChange	pval
ENSG00000001036	FUCA2	1.00477	5.85e-27
ENSG00000001460	STPG1	-1.02385	1.07e-11
ENSG00000001630	CYP51A1	-1.05236	3.35e-16
ENSG00000002549	LAP3	2.19589	1.61e-134
ENSG00000002919	SNX11	-1.26058	2.36e-36
ENSG00000004468	CD38	1.63866	1.66e-54
ENSG00000004776	HSPB6	1.41659	0.000343548
ENSG00000004799	PDK4	-1.13865	1.66e-48
ENSG00000004838	ZMYND10	3.25827	2.26e-41
ENSG00000004948	CALCR	2.8961	0.000624742
ENSG00000004975	DVL2	-1.315	3.52e-53
ENSG00000005379	TSPOAP1	6.79129	1.66e-26
ENSG00000005486	RHBDD2	1.15119	6.25e-13
ENSG00000005513	SOX8	-1.11293	0.000695876
ENSG00000005955	NA	-1.11521	1.02e-42
ENSG00000006016	CRLF1	1.04291	4.07e-05
ENSG00000006432	MAP3K9	-1.31204	1.69e-41
ENSG00000006606	CCL26	2.04298	2.63e-06
ENSG00000007047	MARK4	-1.17858	1.02e-25
ENSG00000007171	NOS2	1.81296	0.00263282
ENSG00000007314	SCN4A	1.16838	0.0263137
ENSG00000007866	TEAD3	-1.2342	8.33e-21
ENSG00000007968	E2F2	-1.21104	4.79e-16
ENSG00000008056	SYN1	4.51619	5.61e-11
ENSG00000008516	MMP25	1.44958	0.000111415
ENSG00000008735	MAPK8IP2	1.0679	5.28e-15
ENSG00000008853	RHOBTB2	-1.16827	2.16e-40
ENSG00000009724	MASP2	1.97565	0.00335336
ENSG00000009950	MLXIPL	-1.19838	4.79e-20
ENSG00000010030	ETV7	4.68857	4.15e-21
ENSG00000010295	IFFO1	1.98478	1.36e-18
ENSG00000010310	GIPR	-1.86426	2.41e-17
ENSG00000010327	STAB1	4.13947	4.59e-13
ENSG00000010379	SLC6A13	1.6417	0.00577791
ENSG00000010610	CD4	5.55412	8.6e-08
ENSG00000010671	BTK	4.88254	2.5e-07
ENSG00000010810	FYN	1.1585	3.19e-11
ENSG00000011523	CEP68	-1.47664	1.6e-51
ENSG00000011677	GABRA3	1.16459	5.32e-05
ENSG00000012211	PRICKLE3	-1.10291	9.75e-23
ENSG00000013392	RWDD2A	-1.05392	1.05e-13
ENSG00000013588	GPRC5A	-1.06232	6.27e-28
ENSG00000015285	WAS	1.63312	5.06e-07
ENSG00000015413	DPEP1	1.84374	6.72e-09
ENSG00000015520	NPC1L1	3.70573	9.44e-37
ENSG00000016391	CHDH	-1.4622	5.8e-30
ENSG00000017373	NA	-1.24288	8.85e-17
ENSG00000017483	SLC38A5	1.48192	0.00378788
ENSG00000019144	PHLDB1	-1.14406	3.89e-18
ENSG00000019995	ZRANB1	-1.1313	1.57e-32
ENSG00000021488	SLC7A9	1.00051	1.72e-06
ENSG00000023892	DEF6	2.49825	8.32e-12
ENSG00000023902	PLEKHO1	-1.01113	3.96e-11
ENSG00000025708	TYMP	2.2063	1.65e-107
ENSG00000026103	FAS	1.73694	1.76e-63
ENSG00000026751	SLAMF7	2.40017	0.000382165
ENSG00000026950	BTN3A1	1.74701	3.34e-47
ENSG00000028277	POU2F2	2.47778	8.1e-19
ENSG00000031544	NA	-2.37324	2.14e-11
ENSG00000033327	GAB2	-1.93841	3.26e-48
ENSG00000033800	PIAS1	-1.15939	5.98e-36
ENSG00000034533	ASTE1	-1.25543	3.79e-12
ENSG00000034677	RNF19A	-1.8212	1.54e-37
ENSG00000036672	USP2	-2.36524	0.0219325
ENSG00000037241	RPL26L1	1.17265	2.08e-31
ENSG00000037637	FBXO42	-1.05482	1.84e-22
ENSG00000039600	SOX30	3.60578	8.06e-06
ENSG00000039987	BEST2	6.60301	1.41e-13
ENSG00000040633	PHF23	-1.26762	7.91e-51
ENSG00000042317	SPATA7	-1.29706	5e-23
ENSG00000042429	MED17	-1.01534	8.48e-25
ENSG00000043355	ZIC2	-1.11562	1.03e-18
ENSG00000043591	ADRB1	-1.92452	0.000581776
ENSG00000047662	FAM184B	5.97427	2.99e-16
ENSG00000048405	ZNF800	-1.28791	4.84e-25
ENSG00000049249	TNFRSF9	1.53361	3.12e-06
ENSG00000049283	EPN3	3.08276	3.97e-05
ENSG00000049449	RCN1	1.35026	2.26e-29
ENSG00000050820	BCAR1	-1.46055	3.59e-65
ENSG00000052802	MSMO1	-1.17557	1.67e-50
ENSG00000054148	PHPT1	1.04777	2.77e-41
ENSG00000054356	PTPRN	1.59018	0.00142494
ENSG00000054938	CHRDL2	3.29039	6.09e-22
ENSG00000054967	RELT	-1.4366	2.66e-22
ENSG00000054983	GALC	1.04383	3.7e-20
ENSG00000055118	KCNH2	-1.48043	2.7e-06
ENSG00000055332	EIF2AK2	1.79953	1.73e-120
ENSG00000057468	MSH4	3.06534	2.54e-05
ENSG00000058262	SEC61A1	1.06285	3.09e-07
ENSG00000059378	PARP12	3.19148	8.29e-283
ENSG00000059728	MXD1	1.60979	6.66e-46
ENSG00000059769	DNAJC25	1.30074	1.13e-16
ENSG00000060069	CTDP1	-1.02963	4.51e-23
ENSG00000060491	OGFR	1.30108	4.71e-59
ENSG00000060982	BCAT1	1.78414	1.48e-52
ENSG00000062282	DGAT2	-1.19631	0.000229691
ENSG00000062370	ZNF112	-1.01684	2.07e-06
ENSG00000062524	LTK	2.09322	6.79e-14
ENSG00000063438	AHRR	2.7515	1.48e-104
ENSG00000064205	WISP2	2.11696	1.11e-16
ENSG00000064300	NGFR	1.14478	0.0103347
ENSG00000064703	DDX20	-1.25608	1.04e-28
ENSG00000064989	CALCRL	1.96955	3.79e-08
ENSG00000065320	NTN1	1.20756	0.000540551
ENSG00000065618	COL17A1	1.76126	0.0218653
ENSG00000065621	GSTO2	1.24839	4.99e-08
ENSG00000066654	THUMPD1	-1.06339	7.09e-33
ENSG00000066735	KIF26A	-1.40407	4.18e-20
ENSG00000067064	IDI1	-1.33126	9.16e-64
ENSG00000067066	SP100	2.25785	8.25e-62
ENSG00000067082	KLF6	-1.02425	9.14e-28
ENSG00000067606	PRKCZ	-1.02532	2.86e-19
ENSG00000068079	IFI35	2.34478	1.5e-140
ENSG00000068354	TBC1D25	-1.06465	9.34e-23
ENSG00000068697	LAPTM4A	1.05228	2.04e-27
ENSG00000068831	RASGRP2	2.87077	4.15e-12
ENSG00000068976	PYGM	5.2682	9.48e-139
ENSG00000069482	GAL	1.08356	3.16e-07
ENSG00000070019	GUCY2C	3.90315	2.18e-07
ENSG00000070047	PHRF1	-1.71769	6.71e-82
ENSG00000070444	MNT	-1.15258	8.99e-31
ENSG00000070669	ASNS	2.64204	2.53e-248
ENSG00000070729	CNGB1	1.08447	0.0467661
ENSG00000070808	CAMK2A	2.37931	0.000536612
ENSG00000071242	RPS6KA2	2.55116	1.72e-14
ENSG00000071677	PRLH	7.73037	1.16e-34
ENSG00000072134	EPN2	-1.20852	1.63e-44
ENSG00000072182	ASIC4	3.58298	2.01e-61
ENSG00000072422	RHOBTB1	-1.20823	7.93e-45
ENSG00000072818	ACAP1	1.37787	0.00476679
ENSG00000072832	CRMP1	-1.48866	5e-12
ENSG00000072864	NDE1	-1.27029	2.7e-39
ENSG00000073711	PPP2R3A	-1.49934	1.11e-21
ENSG00000073737	DHRS9	3.29614	9.69e-05
ENSG00000073756	PTGS2	-1.35401	1.45e-27
ENSG00000074047	GLI2	-1.01705	7.17e-29
ENSG00000074219	TEAD2	-1.13945	1.63e-32
ENSG00000074266	EED	-1.02022	8.04e-22
ENSG00000074527	NTN4	1.48077	1.52e-35
ENSG00000074660	SCARF1	2.81734	1.84e-34
ENSG00000074842	MYDGF	1.12602	1.13e-12
ENSG00000074966	TXK	2.09348	2.92e-07
ENSG00000075420	FNDC3B	-1.05475	3.89e-40
ENSG00000075426	FOSL2	-2.02451	3.35e-48
ENSG00000075651	PLD1	-1.18245	8.81e-39
ENSG00000075891	PAX2	2.43886	6.41e-14
ENSG00000075975	MKRN2	-1.03003	7.89e-27
ENSG00000076604	TRAF4	-1.06874	3.91e-37
ENSG00000077157	PPP1R12B	-1.16685	1.34e-27
ENSG00000077232	DNAJC10	1.18936	1.44e-30
ENSG00000077264	PAK3	1.76941	9.23e-07
ENSG00000077684	JADE1	-1.25449	1.66e-28
ENSG00000078018	MAP2	1.55298	4.47e-24
ENSG00000078081	LAMP3	5.39428	4.92e-169
ENSG00000078098	FAP	8.9612	1.12e-34
ENSG00000078399	HOXA9	2.00251	1.55e-08
ENSG00000078401	EDN1	-1.1274	7.62e-38
ENSG00000079308	TNS1	-1.46514	2.21e-41
ENSG00000079385	CEACAM1	1.6855	1.32e-14
ENSG00000079459	FDFT1	-1.55058	3.39e-92
ENSG00000079482	OPHN1	-1.4077	1.12e-37
ENSG00000079931	MOXD1	1.1393	9.69e-07
ENSG00000080573	COL5A3	1.69551	6.08e-06
ENSG00000081148	IMPG2	3.30102	1.05e-08
ENSG00000081320	STK17B	-1.32241	3.48e-22
ENSG00000081479	LRP2	4.12106	7.42e-05
ENSG00000081692	JMJD4	-1.03678	2.32e-18
ENSG00000081818	PCDHB4	1.02496	0.0326765
ENSG00000082126	MPP4	4.59335	3.29e-16
ENSG00000082497	SERTAD4	-1.13622	3.26e-07
ENSG00000082512	TRAF5	-1.12199	3.25e-29
ENSG00000083814	ZNF671	-1.13685	0.000965447
ENSG00000083828	ZNF586	-1.07226	7.81e-11
ENSG00000083838	ZNF446	-1.05669	2.28e-24
ENSG00000084093	REST	-1.08087	2.47e-29
ENSG00000084110	HAL	2.12489	2.85e-15
ENSG00000085185	BCORL1	-1.19924	6.95e-32
ENSG00000086061	DNAJA1	1.44857	7.92e-85
ENSG00000086062	B4GALT1	1.03557	8.16e-22
ENSG00000086159	AQP6	-2.90006	7.04e-06
ENSG00000086548	CEACAM6	1.11884	4.08e-17
ENSG00000086598	TMED2	1.14804	1.6e-17
ENSG00000086730	LAT2	1.76802	1.95e-18
ENSG00000087085	ACHE	1.11198	0.0298602
ENSG00000087237	CETP	6.30617	1.4e-08
ENSG00000087510	TFAP2C	-1.4266	1.97e-34
ENSG00000087589	CASS4	5.49374	9.12e-57
ENSG00000088002	SULT2B1	1.02359	3.51e-20
ENSG00000088280	ASAP3	-1.29819	3.08e-22
ENSG00000088808	PPP1R13B	-1.33377	1.41e-25
ENSG00000088888	MAVS	-1.11797	8.62e-39
ENSG00000089127	OAS1	3.81435	0
ENSG00000089280	FUS	1.3992	1.17e-78
ENSG00000089639	GMIP	-1.01888	1.08e-11
ENSG00000089692	LAG3	4.0935	1.96e-282
ENSG00000089916	GPATCH2L	-1.44086	9.2e-46
ENSG00000090238	YPEL3	-1.31659	1.05e-20
ENSG00000090339	ICAM1	1.49849	2.38e-28
ENSG00000090382	LYZ	1.67031	0.00421024
ENSG00000090470	PDCD7	-1.38257	1.13e-46
ENSG00000090661	CERS4	-1.02729	3.38e-08
ENSG00000090924	PLEKHG2	-1.11135	1.47e-43
ENSG00000091073	DTX2	-1.26992	3.76e-32
ENSG00000091128	LAMB4	1.37624	0.0188762
ENSG00000091137	SLC26A4	3.28499	1.81e-34
ENSG00000091536	MYO15A	1.24278	2.13e-05
ENSG00000092295	TGM1	1.76371	3.77e-18
ENSG00000092621	PHGDH	1.87712	2.06e-128
ENSG00000092758	COL9A3	4.93264	1.91e-127
ENSG00000095303	PTGS1	1.68372	9.09e-08
ENSG00000095587	TLL2	3.67118	1.21e-20
ENSG00000095596	CYP26A1	3.43331	5.04e-30
ENSG00000095713	CRTAC1	1.11486	0.041183
ENSG00000095794	CREM	1.00457	3.94e-07
ENSG00000096088	PGC	4.8345	1.43e-11
ENSG00000096717	SIRT1	-1.25144	4.86e-44
ENSG00000099250	NRP1	1.01879	8.05e-25
ENSG00000099251	HSD17B7P2	-1.83891	6.63e-26
ENSG00000099260	PALMD	-1.73431	9.29e-06
ENSG00000099617	EFNA2	2.88484	7.62e-85
ENSG00000099625	CBARP	-1.27425	1.81e-06
ENSG00000099834	CDHR5	2.679	2.91e-06
ENSG00000099849	RASSF7	-1.15941	8.72e-39
ENSG00000099889	ARVCF	-1.55263	7.27e-15
ENSG00000099954	CECR2	-1.6834	0.0386484
ENSG00000099985	OSM	7.01061	9.79e-21
ENSG00000099992	TBC1D10A	-1.28287	3.86e-11
ENSG00000099994	SUSD2	1.54539	7.79e-12
ENSG00000099998	GGT5	1.07359	4.57e-05
ENSG00000100014	SPECC1L	-1.09323	4.01e-24
ENSG00000100036	SLC35E4	-1.13118	2.27e-09
ENSG00000100053	CRYBB3	3.11833	4e-05
ENSG00000100056	ESS2	-1.01768	2.13e-18
ENSG00000100065	CARD10	-1.19307	3.64e-38
ENSG00000100068	LRP5L	-1.61895	2.67e-18
ENSG00000100100	PIK3IP1	-1.29039	8.4e-08
ENSG00000100150	DEPDC5	-1.07321	3.3e-14
ENSG00000100167	2020-09-03	-1.06584	2.27e-08
ENSG00000100218	RSPH14	1.08551	7.31e-05
ENSG00000100234	TIMP3	1.51451	2.57e-10
ENSG00000100253	MIOX	2.45543	1.97e-09
ENSG00000100285	NEFH	3.58219	0.00590494
ENSG00000100290	BIK	-2.071	0.0175067
ENSG00000100311	PDGFB	-2.73482	1.97e-59
ENSG00000100330	MTMR3	-1.24552	2.94e-29
ENSG00000100342	APOL1	3.47909	6.6e-129
ENSG00000100344	PNPLA3	-2.83557	5.43e-25
ENSG00000100346	CACNA1I	1.48006	5.29e-09
ENSG00000100385	IL2RB	3.4307	5.91e-06
ENSG00000100426	ZBED4	-1.2922	2.87e-41
ENSG00000100592	DAAM1	-1.21157	2.9e-16
ENSG00000100604	CHGA	1.17189	5.21e-06
ENSG00000100739	BDKRB1	-1.48167	1.5e-10
ENSG00000100867	DHRS2	1.89747	4.06e-20
ENSG00000100889	PCK2	2.18302	2.15e-151
ENSG00000100911	PSME2	1.33427	5.11e-63
ENSG00000100918	REC8	3.09443	4.67e-139
ENSG00000100987	VSX1	-1.0883	0.00042341
ENSG00000101138	CSTF1	-1.43833	2.39e-48
ENSG00000101194	SLC17A9	7.08699	3.03e-20
ENSG00000101198	NKAIN4	1.12943	3.63e-21
ENSG00000101203	COL20A1	1.89415	6.86e-46
ENSG00000101216	GMEB2	-1.42276	1.64e-29
ENSG00000101222	SPEF1	4.13251	1.08e-136
ENSG00000101307	SIRPB1	1.11831	0.0294292
ENSG00000101347	SAMHD1	2.72488	4.57e-60
ENSG00000101405	OXT	5.53942	7.18e-15
ENSG00000101417	PXMP4	-1.04189	3.3e-10
ENSG00000101439	CST3	1.16906	3.66e-18
ENSG00000101445	PPP1R16B	-1.40695	6.85e-06
ENSG00000101544	ADNP2	-1.91838	1.17e-83
ENSG00000101577	LPIN2	-1.42508	2.58e-58
ENSG00000101670	LIPG	-1.52456	4.19e-08
ENSG00000101846	STS	1.29276	1.18e-37
ENSG00000101850	GPR143	2.99429	7.98e-05
ENSG00000102034	ELF4	-1.03433	2.08e-28
ENSG00000102057	KCND1	1.31603	6.62e-36
ENSG00000102109	PCSK1N	1.05171	1.99e-11
ENSG00000102265	TIMP1	1.13652	1.12e-15
ENSG00000102317	RBM3	1.22232	2.45e-58
ENSG00000102384	CENPI	-1.17072	1.36e-28
ENSG00000102387	TAF7L	3.51659	2.19e-05
ENSG00000102452	NALCN	1.15431	1.14e-18
ENSG00000102524	TNFSF13B	3.07391	9.75e-13
ENSG00000102554	KLF5	-1.09668	1.74e-41
ENSG00000102760	RGCC	-3.50404	1e-15
ENSG00000102786	INTS6	-1.6074	3.29e-17
ENSG00000102804	TSC22D1	-1.31242	7.44e-67
ENSG00000102854	MSLN	1.35719	3.96e-06
ENSG00000102870	ZNF629	-1.0558	7.64e-31
ENSG00000103037	SETD6	-1.12266	6.36e-23
ENSG00000103044	HAS3	-1.00955	3.36e-18
ENSG00000103154	NECAB2	1.47441	3.69e-29
ENSG00000103196	CRISPLD2	2.55877	3.71e-15
ENSG00000103199	ZNF500	-1.51719	1.19e-33
ENSG00000103253	HAGHL	1.11838	4.36e-26
ENSG00000103257	SLC7A5	1.60966	9.21e-25
ENSG00000103269	RHBDL1	1.86095	1.43e-37
ENSG00000103449	SALL1	-1.06707	0.000203849
ENSG00000103460	TOX3	-1.79413	4.58e-30
ENSG00000103522	IL21R	-1.85271	0.0029888
ENSG00000103710	RASL12	3.39918	7.77e-29
ENSG00000103811	CTSH	1.08738	1.89e-22
ENSG00000103832	GOLGA8UP	1.48073	0.0286877
ENSG00000104081	BMF	-1.00489	1.53e-22
ENSG00000104142	VPS18	-1.44959	8.99e-30
ENSG00000104221	BRF2	-1.32117	3.45e-21
ENSG00000104228	TRIM35	-1.53082	4.72e-40
ENSG00000104361	NIPAL2	1.01705	1.13e-18
ENSG00000104490	NCALD	-1.34653	1.55e-33
ENSG00000104691	UBXN8	1.3417	1.21e-49
ENSG00000104725	NA	1.3234	1.76e-07
ENSG00000104833	TUBB4A	-1.43077	5.2e-23
ENSG00000104881	PPP1R13L	-1.05541	4.02e-17
ENSG00000104884	ERCC2	-1.06853	1.29e-27
ENSG00000104901	DKKL1	1.35409	0.00371314
ENSG00000104941	RSPH6A	4.55789	2e-08
ENSG00000104951	IL4I1	3.50298	7.89e-11
ENSG00000104967	NOVA2	-1.92435	1.31e-06
ENSG00000105146	AURKC	3.30984	9.77e-16
ENSG00000105173	CCNE1	-1.64302	1.02e-27
ENSG00000105204	DYRK1B	-1.27259	6.61e-41
ENSG00000105219	CNTD2	3.20937	5.47e-47
ENSG00000105261	OVOL3	2.08477	1.82e-11
ENSG00000105281	SLC1A5	1.13055	8.85e-09
ENSG00000105287	PRKD2	1.21344	1.11e-49
ENSG00000105290	APLP1	1.21462	1.21e-15
ENSG00000105325	FZR1	-1.10962	4.03e-31
ENSG00000105369	CD79A	4.0625	6.22e-56
ENSG00000105371	ICAM4	7.69201	2.03e-21
ENSG00000105388	CEACAM5	1.22457	0.0157519
ENSG00000105402	NAPA	1.0267	3.05e-40
ENSG00000105443	CYTH2	-1.15119	2.19e-43
ENSG00000105472	CLEC11A	1.00072	8.39e-07
ENSG00000105479	CCDC114	-1.53724	0.000475984
ENSG00000105499	PLA2G4C	1.05578	4.16e-09
ENSG00000105514	RAB3D	-1.28246	6.66e-38
ENSG00000105516	DBP	-1.34388	1.47e-13
ENSG00000105523	FAM83E	5.75814	7.02e-175
ENSG00000105556	MIER2	-1.56631	2.15e-38
ENSG00000105559	PLEKHA4	3.17463	8.48e-35
ENSG00000105617	LENG1	-2.19832	6.2e-44
ENSG00000105641	SLC5A5	2.63963	8.2e-21
ENSG00000105656	ELL	-1.61852	1.53e-18
ENSG00000105696	TMEM59L	1.18879	2.02e-19
ENSG00000105707	HPN	5.82926	1.6e-146
ENSG00000105929	ATP6V0A4	1.47838	0.00937967
ENSG00000105939	ZC3HAV1	2.66368	1.87e-136
ENSG00000105967	TFEC	-1.74555	0.0375516
ENSG00000105982	RNF32	1.03432	3.42e-05
ENSG00000105996	HOXA2	2.32695	1.55e-32
ENSG00000106003	LFNG	-2.05234	2.73e-39
ENSG00000106025	TSPAN12	1.07157	3.41e-10
ENSG00000106031	HOXA13	-1.30783	3.92e-13
ENSG00000106105	GARS	1.04285	2.63e-43
ENSG00000106125	MINDY4	-1.1559	0.0468172
ENSG00000106299	WASL	-1.27001	1.41e-33
ENSG00000106328	FSCN3	3.3772	1.72e-14
ENSG00000106351	AGFG2	-1.03909	9.84e-25
ENSG00000106366	SERPINE1	1.60051	1.29e-99
ENSG00000106483	SFRP4	1.06498	1.04e-13
ENSG00000106541	AGR2	1.38814	1.81e-17
ENSG00000106546	AHR	-1.40397	3.23e-54
ENSG00000106560	GIMAP2	4.34745	0.00117775
ENSG00000106665	CLIP2	-1.29923	1.06e-51
ENSG00000106785	TRIM14	2.69069	7.62e-209
ENSG00000106852	LHX6	1.38051	0.0109619
ENSG00000106948	AKNA	-1.09863	6.67e-19
ENSG00000106991	ENG	4.77694	4.36e-06
ENSG00000107036	RIC1	-1.23515	6.75e-39
ENSG00000107104	KANK1	-1.20245	1.62e-34
ENSG00000107105	ELAVL2	3.57904	5.32e-07
ENSG00000107159	CA9	1.01729	3.49e-15
ENSG00000107187	LHX3	7.61403	1.87e-21
ENSG00000107201	DDX58	4.27632	0
ENSG00000107317	PTGDS	1.60251	0.00376286
ENSG00000107338	SHB	-1.59956	5.64e-34
ENSG00000107362	ABHD17B	-1.34889	2.91e-35
ENSG00000107372	ZFAND5	-1.44208	2.3e-80
ENSG00000107485	GATA3	1.01756	5.58e-08
ENSG00000107551	RASSF4	-1.27204	2.78e-12
ENSG00000107554	DNMBP	-1.35358	1.66e-56
ENSG00000107731	UNC5B	1.29027	0.000649055
ENSG00000107742	SPOCK2	2.93907	6.04e-74
ENSG00000107798	LIPA	1.17394	8.09e-54
ENSG00000107954	NEURL1	-1.46091	6.35e-08
ENSG00000107957	SH3PXD2A	-1.25947	1.08e-26
ENSG00000107984	DKK1	-1.89031	9.34e-72
ENSG00000108061	SHOC2	-1.14933	1.2e-34
ENSG00000108219	TSPAN14	-1.2487	1.37e-60
ENSG00000108256	NUFIP2	-1.10997	1.65e-45
ENSG00000108309	RUNDC3A	1.28277	0.0370556
ENSG00000108342	CSF3	4.50585	4.77e-12
ENSG00000108352	RAPGEFL1	1.23499	1.49e-25
ENSG00000108375	RNF43	-1.64985	1.42e-39
ENSG00000108448	TRIM16L	-1.08433	8.76e-49
ENSG00000108576	SLC6A4	3.20339	2.63e-06
ENSG00000108679	LGALS3BP	1.74643	2.27e-28
ENSG00000108684	ASIC2	1.96346	1.19e-06
ENSG00000108691	CCL2	1.8315	3e-08
ENSG00000108771	DHX58	6.79143	0
ENSG00000108852	MPP2	-1.31563	2.44e-14
ENSG00000108924	HLF	-1.33268	1.65e-05
ENSG00000108932	SLC16A6	1.77504	1.6e-10
ENSG00000108960	MMD	-1.19891	2.53e-50
ENSG00000109063	MYH3	2.49208	5.89e-38
ENSG00000109065	NAT9	-1.12396	4.11e-38
ENSG00000109072	VTN	1.00302	6.62e-09
ENSG00000109180	OCIAD1	1.03266	1.35e-26
ENSG00000109220	CHIC2	-1.46692	3.69e-14
ENSG00000109255	NMU	1.14638	0.0114107
ENSG00000109265	KIAA1211	-1.07348	1.74e-08
ENSG00000109381	ELF2	-1.01796	2.1e-21
ENSG00000109511	ANXA10	1.28708	0.000736968
ENSG00000109667	SLC2A9	3.81754	3.26e-30
ENSG00000109674	NEIL3	-1.09396	1.25e-25
ENSG00000109743	BST1	1.09127	6.66e-14
ENSG00000109771	LRP2BP	1.45254	0.000279533
ENSG00000109787	KLF3	-1.37137	1.12e-24
ENSG00000109819	PPARGC1A	-2.57527	1.41e-06
ENSG00000109927	TECTA	3.40628	2.18e-34
ENSG00000110057	UNC93B1	1.0276	7.67e-13
ENSG00000110076	NRXN2	2.32606	3.91e-05
ENSG00000110169	HPX	1.30099	2.24e-05
ENSG00000110200	ANAPC15	1.03507	7.36e-26
ENSG00000110375	UPK2	1.32913	0.00303266
ENSG00000110492	MDK	1.7369	2.14e-23
ENSG00000110583	NAA40	-1.27498	6.5e-40
ENSG00000110619	CARS	1.21151	2.31e-54
ENSG00000110876	SELPLG	3.47872	1.69e-41
ENSG00000110921	MVK	-1.74527	2.33e-76
ENSG00000111077	TNS2	-1.1629	6.15e-41
ENSG00000111181	SLC6A12	1.25641	0.00768606
ENSG00000111249	CUX2	1.26022	0.0132614
ENSG00000111254	AKAP3	2.66105	4.36e-09
ENSG00000111331	OAS3	3.02842	0
ENSG00000111335	OAS2	8.95324	1.48e-217
ENSG00000111344	RASAL1	-1.16565	0.049422
ENSG00000111405	ENDOU	7.48027	8.84e-40
ENSG00000111424	VDR	-1.4294	3.84e-12
ENSG00000111490	TBC1D30	-1.17233	2.64e-10
ENSG00000111664	GNB3	2.19249	9.49e-32
ENSG00000111671	SPSB2	-1.52483	2.05e-51
ENSG00000111696	NT5DC3	-1.58823	1.54e-39
ENSG00000111713	GYS2	2.06371	1.31e-12
ENSG00000111727	HCFC2	-1.33016	5.98e-15
ENSG00000111775	COX6A1	1.20542	1.82e-51
ENSG00000111799	COL12A1	1.21801	1.29e-28
ENSG00000111801	BTN3A3	1.38669	8.48e-17
ENSG00000111834	RSPH4A	2.09816	8.99e-10
ENSG00000111837	MAK	1.92142	0.00168719
ENSG00000111859	NEDD9	-1.38302	2.73e-65
ENSG00000111860	CEP85L	-1.21503	4.57e-06
ENSG00000111885	MAN1A1	2.08469	0.000807227
ENSG00000111886	GABRR2	2.01398	6.26e-07
ENSG00000111912	NCOA7	1.33125	9.61e-11
ENSG00000111981	ULBP1	2.31608	7.42e-77
ENSG00000112218	GPR63	-1.06799	1.7e-05
ENSG00000112246	SIM1	5.02877	1.28e-14
ENSG00000112297	CRYBG1	1.77772	5.11e-07
ENSG00000112343	TRIM38	1.00191	5.32e-26
ENSG00000112394	SLC16A10	1.01119	0.00167731
ENSG00000112406	HECA	-1.12523	2.65e-12
ENSG00000112837	TBX18	-1.39741	5.65e-59
ENSG00000112972	HMGCS1	-1.32615	5.03e-68
ENSG00000112996	MRPS30	-1.27757	5.04e-39
ENSG00000113140	SPARC	1.85089	3.15e-36
ENSG00000113161	HMGCR	-1.16676	1.99e-47
ENSG00000113296	THBS4	2.00921	0.0133569
ENSG00000113494	PRLR	4.07469	1.55e-08
ENSG00000113520	IL4	7.23328	9.58e-18
ENSG00000113525	IL5	5.94063	1.41e-08
ENSG00000113645	WWC1	-1.48179	7.22e-77
ENSG00000113658	SMAD5	-1.12325	2.77e-32
ENSG00000113739	STC2	1.32304	2.59e-06
ENSG00000113742	CPEB4	-1.33254	7.12e-09
ENSG00000113761	ZNF346	-1.29037	1.68e-27
ENSG00000113905	HRG	2.94601	0.00106358
ENSG00000113971	NPHP3	-1.01758	6.33e-22
ENSG00000114124	GRK7	3.14249	0.000205194
ENSG00000114200	BCHE	1.41107	1.57e-08
ENSG00000114315	HES1	1.42421	8.16e-52
ENSG00000114455	HHLA2	1.19833	0.00403366
ENSG00000114491	UMPS	-1.33053	7.69e-44
ENSG00000114541	FRMD4B	-1.03501	9.57e-09
ENSG00000114638	UPK1B	1.17959	4.89e-21
ENSG00000114646	CSPG5	1.78364	1.06e-31
ENSG00000114796	KLHL24	-1.06853	8.62e-18
ENSG00000114812	VIPR1	2.88708	8.22e-40
ENSG00000114853	ZBTB47	-1.18746	6.8e-17
ENSG00000114854	TNNC1	1.75303	5.01e-05
ENSG00000115008	IL1A	3.03191	6.5e-06
ENSG00000115170	ACVR1	-1.10808	7.78e-33
ENSG00000115183	TANC1	-1.00232	5.5e-17
ENSG00000115194	SLC30A3	-1.25861	4.9e-13
ENSG00000115263	GCG	8.76493	1.69e-20
ENSG00000115266	APC2	1.75892	2.35e-24
ENSG00000115267	IFIH1	6.04331	0
ENSG00000115297	TLX2	-1.1429	0.0451367
ENSG00000115339	GALNT3	3.67086	1.05e-08
ENSG00000115350	POLE4	1.03615	2.13e-18
ENSG00000115353	TACR1	1.04781	0.000490432
ENSG00000115380	EFEMP1	2.3733	2.83e-36
ENSG00000115415	STAT1	2.51203	1.93e-233
ENSG00000115523	GNLY	6.25923	2.66e-29
ENSG00000115568	ZNF142	-1.08697	4.02e-24
ENSG00000115598	IL1RL2	7.32179	2.8e-22
ENSG00000115607	IL18RAP	6.03118	1.59e-28
ENSG00000115850	LCT	1.69087	0.00873522
ENSG00000115902	SLC1A4	1.41088	7.4e-18
ENSG00000116128	BCL9	-1.38863	1.99e-34
ENSG00000116183	PAPPA2	3.45378	3.65e-05
ENSG00000116254	CHD5	2.17001	2.87e-07
ENSG00000116273	PHF13	-1.03869	2.21e-22
ENSG00000116285	ERRFI1	-1.18568	2.3e-06
ENSG00000116525	TRIM62	-2.13896	7e-17
ENSG00000116584	ARHGEF2	-1.13907	3.83e-14
ENSG00000116604	MEF2D	-1.07028	1.13e-23
ENSG00000116652	DLEU2L	1.34666	0.0210888
ENSG00000116663	FBXO6	1.14176	1.74e-18
ENSG00000116690	PRG4	1.37373	8.89e-13
ENSG00000116701	NCF2	1.08667	1.75e-11
ENSG00000116731	PRDM2	-1.05177	8.41e-22
ENSG00000116745	RPE65	5.67675	4.67e-05
ENSG00000116809	ZBTB17	-1.27639	7.44e-26
ENSG00000116990	MYCL	-1.06488	6.22e-05
ENSG00000117009	KMO	2.57978	6.46e-05
ENSG00000117016	RIMS3	-1.06543	1.5e-14
ENSG00000117226	GBP3	3.08352	6.74e-54
ENSG00000117228	GBP1	6.92871	9.66e-70
ENSG00000117318	ID3	-1.52403	4.22e-73
ENSG00000117410	ATP6V0B	1.13208	2.93e-46
ENSG00000117425	PTCH2	1.09313	5.38e-08
ENSG00000117472	TSPAN1	1.21451	0.000166172
ENSG00000117586	TNFSF4	2.307	3.74e-05
ENSG00000117595	IRF6	1.47825	0.00682746
ENSG00000117601	SERPINC1	3.13774	1.43e-07
ENSG00000117707	PROX1	1.66651	0.00624883
ENSG00000118058	KMT2A	-1.01467	3.23e-10
ENSG00000118160	SLC8A2	1.83449	1.1e-09
ENSG00000118369	USP35	-1.62793	1.66e-32
ENSG00000118407	FILIP1	-1.47477	6.3e-54
ENSG00000118482	PHF3	-1.64421	8.02e-45
ENSG00000118495	PLAGL1	1.00013	5.05e-09
ENSG00000118503	TNFAIP3	1.69349	4.59e-12
ENSG00000118513	MYB	-1.18815	0.0430701
ENSG00000118514	ALDH8A1	2.70906	8.06e-12
ENSG00000118849	RARRES1	1.45235	3.01e-19
ENSG00000118898	PPL	-1.41943	8.4e-23
ENSG00000118900	UBN1	-1.04803	1.02e-34
ENSG00000118922	KLF12	-1.02636	5.47e-17
ENSG00000118946	PCDH17	-1.28573	0.00119817
ENSG00000118985	ELL2	-1.26641	3.65e-33
ENSG00000119138	KLF9	-1.09144	2.44e-12
ENSG00000119283	TRIM67	-1.31715	1.63e-08
ENSG00000119401	TRIM32	-1.42386	5.07e-46
ENSG00000119508	NR4A3	-1.7705	7.59e-14
ENSG00000119574	ZBTB45	-1.42993	2.61e-25
ENSG00000119599	DCAF4	-1.35358	2.88e-33
ENSG00000119630	PGF	1.00155	0.00953186
ENSG00000119703	ZC2HC1C	-1.85451	1.48e-11
ENSG00000119714	GPR68	1.27268	0.00451789
ENSG00000119737	GPR75	1.02612	4.59e-05
ENSG00000119915	ELOVL3	3.5974	5.27e-12
ENSG00000119917	IFIT3	6.25769	1.57e-227
ENSG00000119922	IFIT2	7.83701	1.91e-118
ENSG00000119938	PPP1R3C	-2.51281	2.87e-32
ENSG00000119986	AVPI1	-1.20519	2.86e-42
ENSG00000120057	SFRP5	1.15214	0.0064907
ENSG00000120071	KANSL1	-1.01347	1e-25
ENSG00000120156	TEK	4.07268	1.14e-11
ENSG00000120158	RCL1	-1.39773	1.25e-43
ENSG00000120211	INSL4	1.10467	1.07e-29
ENSG00000120217	CD274	4.36242	2.89e-43
ENSG00000120327	PCDHB14	1.07479	0.0149354
ENSG00000120332	TNN	4.13431	1.51e-05
ENSG00000120334	CENPL	-1.08828	1.36e-14
ENSG00000120437	ACAT2	-1.22419	2.7e-50
ENSG00000120471	TP53AIP1	3.15841	8.13e-06
ENSG00000120549	KIAA1217	1.1216	4.38e-31
ENSG00000120555	SEPT7P9	2.25403	8.97e-05
ENSG00000120658	ENOX1	1.3605	0.000177576
ENSG00000120675	DNAJC15	1.07462	0.0335356
ENSG00000120696	KBTBD7	-1.07566	1.51e-13
ENSG00000120697	ALG5	1.07137	5.67e-36
ENSG00000120709	FAM53C	-1.11394	8.83e-36
ENSG00000120738	EGR1	3.27729	1.52e-11
ENSG00000120820	GLT8D2	2.73054	0.000126412
ENSG00000120832	MTERF2	-1.27827	5.34e-25
ENSG00000120875	DUSP4	-1.03686	8.51e-45
ENSG00000120910	PPP3CC	-1.26027	4.06e-22
ENSG00000121005	CRISPLD1	1.10891	5.44e-06
ENSG00000121058	COIL	-1.08292	3.13e-27
ENSG00000121060	TRIM25	2.21162	2e-178
ENSG00000121073	SLC35B1	1.13011	6.34e-22
ENSG00000121297	TSHZ3	-1.01261	2.49e-11
ENSG00000121454	LHX4	-1.1875	9.85e-17
ENSG00000121552	CSTA	1.8882	2.44e-09
ENSG00000121577	POPDC2	3.4214	8.69e-21
ENSG00000121621	KIF18A	-1.21748	9.89e-36
ENSG00000121671	CRY2	-1.77462	8.42e-36
ENSG00000121858	TNFSF10	5.4303	8.35e-82
ENSG00000121864	ZNF639	-1.17304	9.98e-26
ENSG00000121903	ZSCAN20	-1.43173	3.35e-12
ENSG00000121966	CXCR4	2.18851	1.89e-06
ENSG00000122035	RASL11A	2.28341	3.63e-31
ENSG00000122257	RBBP6	1.78163	1.26e-114
ENSG00000122367	LDB3	1.08106	0.0269974
ENSG00000122390	NAA60	-1.37964	6.91e-09
ENSG00000122432	SPATA1	1.77182	5.71e-06
ENSG00000122477	LRRC39	1.36211	0.00107051
ENSG00000122547	EEPD1	-1.33827	2.2e-29
ENSG00000122643	NT5C3A	1.80479	1.76e-39
ENSG00000122644	ARL4A	-1.30491	1.82e-34
ENSG00000122678	POLM	-1.03549	2.41e-17
ENSG00000122862	SRGN	1.03806	5.04e-25
ENSG00000122986	HVCN1	1.34748	1.93e-10
ENSG00000123131	PRDX4	1.29978	1.14e-15
ENSG00000123329	ARHGAP9	3.47615	1.05e-11
ENSG00000123358	NR4A1	-1.32155	2.2e-41
ENSG00000123364	HOXC13	-1.04489	1.68e-11
ENSG00000123411	IKZF4	1.07638	2.14e-15
ENSG00000123609	NMI	1.39748	1.69e-20
ENSG00000123612	ACVR1C	1.89354	0.00335989
ENSG00000123700	KCNJ2	-2.04973	3.83e-08
ENSG00000123901	GPR83	5.32781	3.98e-31
ENSG00000124092	CTCFL	4.86141	1.45e-06
ENSG00000124102	PI3	3.49004	2.27e-08
ENSG00000124103	FAM209A	1.37858	0.000207305
ENSG00000124104	SNX21	-1.03996	3.21e-14
ENSG00000124107	SLPI	1.79455	4.19e-18
ENSG00000124145	SDC4	1.36991	5.76e-31
ENSG00000124151	NCOA3	-1.16174	7.08e-22
ENSG00000124155	PIGT	1.15776	2.86e-15
ENSG00000124159	MATN4	2.97169	2.68e-07
ENSG00000124191	TOX2	-1.40617	7.19e-19
ENSG00000124201	ZNFX1	2.05485	2.16e-147
ENSG00000124216	SNAI1	1.68205	5.47e-29
ENSG00000124217	MOCS3	-1.36692	1.7e-27
ENSG00000124224	PPP4R1L	-1.11596	7.25e-11
ENSG00000124249	KCNK15	1.64534	0.000221127
ENSG00000124256	ZBP1	6.86001	3.23e-16
ENSG00000124466	LYPD3	3.9965	1.18e-25
ENSG00000124507	PACSIN1	-1.20738	1.04e-05
ENSG00000124766	SOX4	-1.40911	5.48e-70
ENSG00000124839	RAB17	-1.31765	0.000430213
ENSG00000124882	EREG	1.03071	6.7e-24
ENSG00000125148	MT2A	1.61616	1.4e-32
ENSG00000125266	EFNB2	2.64384	2.21e-29
ENSG00000125319	C17orf53	-1.35816	8.67e-19
ENSG00000125347	IRF1	3.04489	2.78e-281
ENSG00000125378	BMP4	-1.24988	1.52e-36
ENSG00000125384	PTGER2	-1.71468	4.66e-10
ENSG00000125386	FAM193A	-1.14899	2.8e-25
ENSG00000125398	SOX9	-1.08522	2.18e-31
ENSG00000125508	SRMS	6.8009	3.09e-12
ENSG00000125618	PAX8	-1.2695	0.000314848
ENSG00000125657	TNFSF9	-1.42147	7.68e-21
ENSG00000125730	C3	1.15254	6.87e-15
ENSG00000125731	SH2D3A	-1.29478	1.86e-22
ENSG00000125735	TNFSF14	2.05929	1.27e-11
ENSG00000125740	FOSB	1.51362	0.000306205
ENSG00000125753	VASP	-1.02425	1.97e-38
ENSG00000125775	SDCBP2	1.32547	0.000383668
ENSG00000125780	TGM3	1.06568	0.00655771
ENSG00000125787	GNRH2	4.18845	8.2e-41
ENSG00000125845	BMP2	-1.46364	0.000456295
ENSG00000125875	TBC1D20	-1.02229	5.53e-36
ENSG00000125898	FAM110A	-1.53228	5.36e-23
ENSG00000125931	CITED1	2.19926	1.97e-07
ENSG00000125945	ZNF436	-1.01827	6.58e-14
ENSG00000126003	PLAGL2	-1.33971	4.79e-38
ENSG00000126217	MCF2L	-1.30235	3.94e-19
ENSG00000126243	LRFN3	-1.11829	6.2e-29
ENSG00000126464	PRR12	-1.28923	9.2e-48
ENSG00000126500	FLRT1	2.63223	5.96e-11
ENSG00000126562	WNK4	1.61517	1.78e-56
ENSG00000126603	GLIS2	-1.01646	8.78e-32
ENSG00000126705	AHDC1	-1.60769	2.09e-39
ENSG00000126709	IFI6	6.73081	0
ENSG00000126759	CFP	2.35457	2.13e-21
ENSG00000126822	PLEKHG3	-1.80052	1.7e-73
ENSG00000127080	IPPK	-1.59622	7.77e-38
ENSG00000127081	ZNF484	-1.57172	3.09e-13
ENSG00000127334	DYRK2	-1.64947	4.31e-55
ENSG00000127423	AUNIP	-1.47676	1.05e-10
ENSG00000127452	FBXL12	-1.00882	3.78e-16
ENSG00000127528	KLF2	-2.43285	2.29e-31
ENSG00000127578	WFIKKN1	1.17525	0.00112413
ENSG00000127616	SMARCA4	-1.37536	9.94e-27
ENSG00000127663	KDM4B	-1.17143	2.06e-28
ENSG00000127947	PTPN12	-1.10543	1.88e-45
ENSG00000127989	MTERF1	-1.44073	3.64e-27
ENSG00000128253	RFPL2	1.56561	2.61e-08
ENSG00000128271	ADORA2A	1.13577	0.0174526
ENSG00000128274	A4GALT	-1.16957	6.85e-15
ENSG00000128284	APOL3	5.65293	1.36e-16
ENSG00000128322	IGLL1	5.87185	7.11e-12
ENSG00000128335	APOL2	3.2062	4.94e-284
ENSG00000128342	LIF	-1.29035	4.14e-15
ENSG00000128394	APOBEC3F	1.23336	3.26e-17
ENSG00000128408	RIBC2	-1.62314	3.6e-09
ENSG00000128510	CPA4	4.73078	1.81e-07
ENSG00000128595	CALU	1.03073	3.95e-31
ENSG00000128652	HOXD3	1.37201	9.13e-07
ENSG00000128683	GAD1	2.60722	2.07e-07
ENSG00000128709	HOXD9	1.18182	0.000209162
ENSG00000128710	HOXD10	1.064	2.27e-07
ENSG00000128805	ARHGAP22	-1.0262	2.54e-07
ENSG00000128849	CGNL1	-1.3602	4.88e-22
ENSG00000128917	DLL4	-1.24051	0.000503145
ENSG00000129048	ACKR4	3.81998	2.92e-06
ENSG00000129071	MBD4	-1.31608	5.52e-46
ENSG00000129167	TPH1	1.8919	6.66e-05
ENSG00000129194	SOX15	3.81067	3.22e-17
ENSG00000129204	USP6	3.00544	0.00148242
ENSG00000129226	CD68	5.80043	8.64e-08
ENSG00000129255	MPDU1	1.13612	5.4e-15
ENSG00000129437	KLK14	3.25448	3.83e-29
ENSG00000129451	KLK10	2.15579	1.6e-05
ENSG00000129480	DTD2	-1.10154	8.14e-22
ENSG00000129521	EGLN3	-1.66276	1.46e-15
ENSG00000129562	DAD1	1.00793	2.85e-16
ENSG00000129654	FOXJ1	1.18323	8.17e-05
ENSG00000129675	ARHGEF6	2.82166	4.13e-12
ENSG00000129749	CHRNA10	2.1851	2.02e-27
ENSG00000129988	LBP	3.36715	5.28e-18
ENSG00000129990	SYT5	3.30281	9.69e-12
ENSG00000129993	CBFA2T3	-1.46931	0.0209519
ENSG00000130055	GDPD2	2.35268	0.000169849
ENSG00000130201	NA	-1.12467	0.00130217
ENSG00000130203	APOE	1.84334	1e-31
ENSG00000130208	APOC1	1.22036	3.78e-21
ENSG00000130294	KIF1A	1.50331	1.87e-15
ENSG00000130303	BST2	4.94068	2.22e-44
ENSG00000130479	MAP1S	-1.31792	2.55e-20
ENSG00000130487	KLHDC7B	1.36066	0.018203
ENSG00000130489	SCO2	1.43825	5.96e-53
ENSG00000130518	IQCN	1.43012	8.9e-17
ENSG00000130522	JUND	-1.49316	1.92e-40
ENSG00000130584	ZBTB46	-1.9455	6.91e-14
ENSG00000130589	HELZ2	4.74146	0
ENSG00000130600	H19	2.47438	1.92e-30
ENSG00000130700	GATA5	-1.40034	0.000154779
ENSG00000130707	ASS1	1.09331	3.17e-39
ENSG00000130775	THEMIS2	4.08472	2.96e-140
ENSG00000130783	CCDC62	2.30084	4.55e-08
ENSG00000130813	C19orf66	2.52889	5.62e-182
ENSG00000130822	PNCK	1.42006	0.0134557
ENSG00000130948	HSD17B3	-1.17612	0.0280033
ENSG00000130988	RGN	2.31612	0.000339874
ENSG00000131015	ULBP2	1.32873	2.54e-07
ENSG00000131069	ACSS2	-1.36727	5.67e-52
ENSG00000131203	IDO1	8.41969	1.02e-91
ENSG00000131379	C3orf20	1.22631	0.0123847
ENSG00000131471	AOC3	2.22778	2.55e-89
ENSG00000131480	AOC2	1.05081	8.26e-20
ENSG00000131503	ANKHD1	-1.11551	6.98e-06
ENSG00000131746	TNS4	-1.71121	4.41e-90
ENSG00000131781	FMO5	-1.13231	1.65e-12
ENSG00000131845	ZNF304	1.49911	1.04e-13
ENSG00000131885	KRT17P1	6.5177	8.67e-13
ENSG00000131941	RHPN2	-1.15401	3.27e-49
ENSG00000132003	ZSWIM4	-1.76722	9.66e-37
ENSG00000132031	MATN3	1.15557	2.39e-41
ENSG00000132109	TRIM21	2.79593	2.03e-225
ENSG00000132141	CCT6B	1.22499	6.39e-09
ENSG00000132196	HSD17B7	-1.07639	6.28e-27
ENSG00000132205	EMILIN2	-1.1957	1.23e-16
ENSG00000132256	TRIM5	1.2552	2.68e-50
ENSG00000132274	TRIM22	4.98648	3.6e-88
ENSG00000132286	TIMM10B	-1.43941	2.98e-31
ENSG00000132330	SCLY	-1.0227	4.55e-05
ENSG00000132334	PTPRE	-1.27646	0.0132554
ENSG00000132386	SERPINF1	1.51188	6.34e-21
ENSG00000132423	COQ3	1.14717	1.94e-23
ENSG00000132432	SEC61G	1.01112	7.3e-25
ENSG00000132467	UTP3	-1.12828	1.26e-30
ENSG00000132470	ITGB4	-1.20577	6.37e-54
ENSG00000132481	TRIM47	-1.02884	3.18e-14
ENSG00000132530	XAF1	9.68217	1.34e-116
ENSG00000132535	DLG4	-1.24201	5.69e-31
ENSG00000132554	RGS22	2.90478	0.000125752
ENSG00000132563	REEP2	1.09513	1.32e-24
ENSG00000132622	HSPA12B	-1.38954	0.00116807
ENSG00000132698	RAB25	5.76869	6.4e-19
ENSG00000132740	IGHMBP2	-1.15785	9.31e-24
ENSG00000132749	TESMIN	-1.50804	1.52e-18
ENSG00000132763	MMACHC	-1.50206	4.88e-09
ENSG00000132825	PPP1R3D	-1.63256	2.51e-22
ENSG00000132832	ENSG00000132832	2.28644	0.00208147
ENSG00000132950	ZMYM5	-1.03597	3.96e-15
ENSG00000133069	TMCC2	-1.3335	1.43e-09
ENSG00000133101	CCNA1	4.72147	1.37e-06
ENSG00000133106	EPSTI1	5.47317	1.14e-28
ENSG00000133111	RFXAP	-1.07072	6.47e-07
ENSG00000133121	STARD13	-1.28965	1.74e-11
ENSG00000133136	GNG5P2	1.05525	0.00271714
ENSG00000133247	KMT5C	-1.51591	3.4e-32
ENSG00000133321	RARRES3	2.2075	2.47e-34
ENSG00000133328	HRASLS2	2.12888	5.17e-07
ENSG00000133392	MYH11	4.06886	8.97e-17
ENSG00000133401	PDZD2	3.61551	0.00635391
ENSG00000133422	MORC2	-1.23237	4.24e-39
ENSG00000133519	ZDHHC8P1	-1.50796	1.38e-14
ENSG00000133619	KRBA1	-1.23346	1.11e-18
ENSG00000133639	BTG1	-1.61806	4.8e-72
ENSG00000133703	KRAS	-1.0154	3.49e-31
ENSG00000133962	CATSPERB	1.69059	0.00273583
ENSG00000134013	LOXL2	1.69971	6.94e-22
ENSG00000134070	IRAK2	-1.03105	1.61e-27
ENSG00000134086	VHL	-1.13728	1.98e-39
ENSG00000134152	KATNBL1	-1.06997	2.2e-29
ENSG00000134153	EMC7	1.02145	2.97e-20
ENSG00000134242	PTPN22	5.30987	1.22e-15
ENSG00000134256	CD101	2.23653	6.76e-18
ENSG00000134258	VTCN1	3.29972	2.5e-07
ENSG00000134321	RSAD2	9.06042	2.97e-145
ENSG00000134326	CMPK2	7.64438	1.45e-144
ENSG00000134470	IL15RA	2.66738	7.12e-48
ENSG00000134489	HRH4	3.53374	6.92e-08
ENSG00000134684	YARS	1.38614	1.09e-72
ENSG00000134698	AGO4	-1.07316	2.12e-19
ENSG00000134716	CYP2J2	3.19665	1.08e-07
ENSG00000134817	APLNR	2.73127	8.25e-08
ENSG00000134827	TCN1	1.20406	1.67e-06
ENSG00000134830	C5AR2	-1.74085	0.0257523
ENSG00000135047	CTSL	1.31377	1.47e-40
ENSG00000135069	PSAT1	2.05246	1.76e-121
ENSG00000135083	CCNJL	-1.22842	2.68e-40
ENSG00000135094	SDS	3.58928	5.75e-07
ENSG00000135114	OASL	8.63239	2.1e-303
ENSG00000135116	HRK	1.96707	0.000605525
ENSG00000135205	CCDC146	-1.5019	6.88e-14
ENSG00000135220	UGT2A3	1.38465	4.72e-05
ENSG00000135226	UGT2B28	1.88486	0.00656652
ENSG00000135245	HILPDA	-2.23915	1.78e-132
ENSG00000135362	PRR5L	-1.22323	4.39e-21
ENSG00000135363	LMO2	5.89487	1.55e-48
ENSG00000135406	PRPH	5.27858	6.8e-229
ENSG00000135407	AVIL	3.1817	1.29e-222
ENSG00000135409	AMHR2	4.55983	2.13e-24
ENSG00000135424	ITGA7	2.66735	2.92e-76
ENSG00000135439	AGAP2	-1.74403	0.00284393
ENSG00000135447	PPP1R1A	1.29129	0.0138254
ENSG00000135472	FAIM2	-1.41682	0.00156272
ENSG00000135473	PAN2	1.04485	5.06e-38
ENSG00000135482	ZC3H10	-1.37548	2.41e-19
ENSG00000135503	ACVR1B	-1.00452	5.74e-23
ENSG00000135605	TEC	-1.46168	2.45e-10
ENSG00000135631	RAB11FIP5	-1.08107	1.31e-36
ENSG00000135678	CPM	1.19797	3.92e-18
ENSG00000135740	SLC9A5	1.04928	2.68e-17
ENSG00000135744	AGT	1.95098	3.96e-13
ENSG00000135763	URB2	-1.04155	3.29e-25
ENSG00000135766	EGLN1	-1.05902	5.69e-43
ENSG00000135821	GLUL	-1.31858	1.01e-44
ENSG00000135823	STX6	-1.06122	3.56e-28
ENSG00000135842	FAM129A	1.38828	2.47e-14
ENSG00000135899	SP110	3.73394	1.62e-247
ENSG00000135912	TTLL4	-1.42508	3.01e-46
ENSG00000135914	HTR2B	1.12672	0.000308657
ENSG00000135929	CYP27A1	2.15227	0.000115217
ENSG00000135974	C2orf49	-1.13535	2.27e-27
ENSG00000136010	ALDH1L2	1.73877	9.04e-33
ENSG00000136059	VILL	1.33593	0.00103665
ENSG00000136141	LRCH1	-1.40503	6.32e-42
ENSG00000136147	PHF11	1.669	6.01e-53
ENSG00000136158	SPRY2	-2.13155	1.81e-85
ENSG00000136167	LCP1	1.2117	0.0103924
ENSG00000136240	KDELR2	1.07959	4.65e-19
ENSG00000136244	IL6	3.09307	1.04e-05
ENSG00000136286	MYO1G	1.49174	0.0224382
ENSG00000136404	TM6SF1	2.89625	5.81e-17
ENSG00000136504	KAT7	-1.6209	3.87e-69
ENSG00000136535	TBR1	6.17279	8.94e-30
ENSG00000136628	EPRS	1.1242	1.56e-50
ENSG00000136630	HLX	-1.31306	9.32e-06
ENSG00000136807	CDK9	-1.46195	1.03e-55
ENSG00000136870	ZNF189	-1.27223	1.9e-34
ENSG00000136943	CTSV	1.3808	1.97e-35
ENSG00000136999	NOV	1.81688	1.42e-22
ENSG00000137094	DNAJB5	-1.81081	4.69e-12
ENSG00000137185	ZSCAN9	-1.23433	9.31e-21
ENSG00000137193	PIM1	-1.15095	6.23e-31
ENSG00000137198	GMPR	2.41367	1.85e-09
ENSG00000137265	IRF4	5.18518	4.2e-13
ENSG00000137270	GCM1	4.53674	2.68e-09
ENSG00000137434	C6orf52	1.99643	7.48e-23
ENSG00000137440	FGFBP1	-1.29688	8.73e-07
ENSG00000137460	FHDC1	4.15439	5.13e-154
ENSG00000137463	MGARP	1.82051	0.00384895
ENSG00000137474	MYO7A	-1.17334	1.42e-14
ENSG00000137486	ARRB1	-1.63992	6.99e-57
ENSG00000137491	SLCO2B1	1.00582	1.68e-18
ENSG00000137504	CREBZF	-1.14026	3.07e-23
ENSG00000137507	LRRC32	1.00807	5e-06
ENSG00000137563	GGH	1.07672	9.05e-44
ENSG00000137628	DDX60	3.55536	1.43e-238
ENSG00000137656	BUD13	-1.52144	1.35e-31
ENSG00000137699	TRIM29	2.00232	1.31e-05
ENSG00000137731	FXYD2	-1.17628	8.99e-11
ENSG00000137752	CASP1	2.61708	5.88e-10
ENSG00000137843	PAK6	7.23978	6.63e-25
ENSG00000137860	SLC28A2	-1.45051	0.00316659
ENSG00000137869	CYP19A1	2.63995	0.000813506
ENSG00000137875	BCL2L10	2.16414	1.76e-12
ENSG00000137877	SPTBN5	1.72436	6.41e-08
ENSG00000137936	BCAR3	-1.26083	2.07e-40
ENSG00000137955	RABGGTB	-1.01584	1.55e-31
ENSG00000137959	IFI44L	8.12866	2.35e-127
ENSG00000137962	ARHGAP29	-1.55169	1.41e-52
ENSG00000137965	IFI44	8.59436	1.17e-147
ENSG00000138035	PNPT1	2.29544	1.09e-164
ENSG00000138061	CYP1B1	2.39979	1.13e-149
ENSG00000138085	ATRAID	1.22268	1.75e-25
ENSG00000138115	CYP2C8	4.74793	6.61e-10
ENSG00000138152	BTBD16	1.36703	5.07e-10
ENSG00000138166	DUSP5	-1.5296	5.63e-53
ENSG00000138311	ZNF365	-1.49605	2.19e-06
ENSG00000138315	OIT3	3.24382	4.47e-17
ENSG00000138336	TET1	-2.00929	1.28e-15
ENSG00000138356	AOX1	1.56827	1.79e-06
ENSG00000138378	STAT4	1.52236	4.56e-22
ENSG00000138379	MSTN	2.47926	1.8e-08
ENSG00000138411	HECW2	1.016	1.06e-12
ENSG00000138449	SLC40A1	-1.06582	1.05e-34
ENSG00000138496	PARP9	3.57569	0
ENSG00000138606	SHF	-1.42871	1.02e-09
ENSG00000138615	CILP	2.70765	1.47e-21
ENSG00000138617	PARP16	-1.04157	1.57e-20
ENSG00000138623	SEMA7A	1.2928	0.000192233
ENSG00000138642	HERC6	3.55277	0
ENSG00000138646	HERC5	4.76502	2.03e-197
ENSG00000138696	BMPR1B	-1.12991	1.17e-34
ENSG00000138760	SCARB2	1.15041	2.49e-42
ENSG00000138764	CCNG2	-1.30172	6.06e-27
ENSG00000138771	SHROOM3	-1.11293	3.43e-27
ENSG00000138802	SEC24B	-1.062	5.45e-30
ENSG00000138823	MTTP	4.90556	3.34e-12
ENSG00000139132	FGD4	-1.03186	1.6e-13
ENSG00000139146	SINHCAF	-1.02646	1.44e-34
ENSG00000139154	AEBP2	-1.22754	1.01e-33
ENSG00000139155	SLCO1C1	3.83258	2.7e-08
ENSG00000139174	PRICKLE1	-1.08126	3.78e-06
ENSG00000139192	TAPBPL	1.21186	4.81e-15
ENSG00000139219	COL2A1	7.82672	3.08e-87
ENSG00000139269	INHBE	1.05782	0.000307663
ENSG00000139278	GLIPR1	1.1892	1.4e-30
ENSG00000139289	PHLDA1	-1.27113	5.63e-54
ENSG00000139318	DUSP6	-1.00801	9.39e-28
ENSG00000139351	SYCP3	3.13372	6.61e-06
ENSG00000139410	SDSL	1.12303	5.05e-29
ENSG00000139517	LNX2	-1.17329	7.04e-15
ENSG00000139540	SLC39A5	1.09374	0.0185683
ENSG00000139547	RDH16	1.22922	0.00116456
ENSG00000139597	N4BP2L1	1.47309	3.12e-07
ENSG00000139625	MAP3K12	-1.21698	7.13e-43
ENSG00000139626	ITGB7	2.44033	1.79e-08
ENSG00000139636	LMBR1L	-1.01586	7.06e-24
ENSG00000139644	TMBIM6	1.05534	1.91e-22
ENSG00000139651	ZNF740	-1.36852	1.62e-54
ENSG00000139722	VPS37B	-1.46684	3.24e-46
ENSG00000139737	SLAIN1	-1.27237	3.96e-09
ENSG00000139832	RAB20	-1.11962	0.000642181
ENSG00000139890	REM2	3.26846	1.44e-76
ENSG00000139914	FITM1	2.83401	8.3e-06
ENSG00000140057	AK7	-1.04995	4.31e-19
ENSG00000140092	FBLN5	1.1315	4.32e-23
ENSG00000140105	WARS	2.03402	1.54e-43
ENSG00000140279	DUOX2	3.08717	1.41e-07
ENSG00000140285	FGF7	7.64618	1.18e-22
ENSG00000140320	BAHD1	-1.02697	1.27e-20
ENSG00000140332	TLE3	-1.17584	3.85e-25
ENSG00000140406	TLNRD1	-1.3301	2.99e-36
ENSG00000140464	PML	1.97222	7.68e-101
ENSG00000140465	CYP1A1	6.65277	5.52e-107
ENSG00000140471	LINS1	-1.0585	9.47e-19
ENSG00000140511	HAPLN3	1.86142	4.33e-76
ENSG00000140519	RHCG	1.7875	2.22e-20
ENSG00000140534	TICRR	-1.02208	1.96e-26
ENSG00000140548	ZNF710	-1.05235	6.76e-21
ENSG00000140807	NKD1	-1.26823	9.7e-08
ENSG00000140853	NLRC5	3.65306	0
ENSG00000140932	CMTM2	3.41854	1.06e-09
ENSG00000140937	CDH11	2.56049	9.59e-07
ENSG00000140950	TLDC1	-1.18829	6.41e-34
ENSG00000140961	OSGIN1	-1.24324	9.56e-37
ENSG00000140968	IRF8	1.89476	4.62e-11
ENSG00000141026	MED9	-1.65432	1.01e-47
ENSG00000141034	GID4	-1.12494	6.98e-24
ENSG00000141150	NA	2.39325	1.08e-07
ENSG00000141349	G6PC3	1.15115	5.44e-15
ENSG00000141469	SLC14A1	-2.9032	3.5e-06
ENSG00000141497	ZMYND15	2.17704	9.66e-11
ENSG00000141505	ASGR1	1.00981	3.61e-10
ENSG00000141524	TMC6	-1.10588	3.71e-21
ENSG00000141540	TTYH2	1.18104	1.5e-11
ENSG00000141574	SECTM1	3.00238	6.56e-46
ENSG00000141577	CEP131	-1.29174	4.05e-25
ENSG00000141655	TNFRSF11A	1.38039	4.12e-28
ENSG00000141682	PMAIP1	1.21942	1.06e-09
ENSG00000141738	GRB7	-1.08102	3.03e-24
ENSG00000141965	FEM1A	-1.27266	1.27e-32
ENSG00000142089	IFITM3	2.53106	4.11e-103
ENSG00000142149	HUNK	-1.39229	2.42e-23
ENSG00000142319	SLC6A3	6.68836	1.55e-11
ENSG00000142408	CACNG8	1.42385	3.88e-39
ENSG00000142444	TIMM29	-1.09127	1.08e-16
ENSG00000142583	SLC2A5	4.03732	7.56e-24
ENSG00000142675	CNKSR1	2.00791	8.68e-12
ENSG00000143028	SYPL2	2.20986	0.000738603
ENSG00000143067	ZNF697	-1.89274	2.66e-16
ENSG00000143079	CTTNBP2NL	-1.6098	1.36e-42
ENSG00000143093	STRIP1	-1.00548	1.33e-22
ENSG00000143107	FNDC7	7.27736	4.64e-34
ENSG00000143110	C1orf162	4.57887	4.75e-50
ENSG00000143162	CREG1	1.031	1.6e-22
ENSG00000143183	TMCO1	1.1137	4.09e-20
ENSG00000143199	ADCY10	3.27708	1.16e-22
ENSG00000143248	RGS5	1.04003	0.000662019
ENSG00000143278	F13B	2.47004	2.75e-24
ENSG00000143319	ISG20L2	-1.35639	1.66e-48
ENSG00000143320	CRABP2	2.45702	3.2e-44
ENSG00000143344	RGL1	-1.08797	5.84e-12
ENSG00000143355	LHX9	2.97433	7.9e-16
ENSG00000143369	ECM1	1.36145	1.04e-11
ENSG00000143373	ZNF687	-1.37426	6.73e-48
ENSG00000143409	MINDY1	-1.18113	1.05e-15
ENSG00000143437	ARNT	-1.31173	2.15e-44
ENSG00000143476	DTL	-1.12896	7.62e-31
ENSG00000143479	DYRK3	-1.35823	3.22e-17
ENSG00000143507	DUSP10	-1.94137	7.13e-19
ENSG00000143514	TP53BP2	-1.01928	5.15e-28
ENSG00000143554	SLC27A3	2.04115	1.42e-58
ENSG00000143575	HAX1	1.16487	1.61e-39
ENSG00000143632	ACTA1	5.75217	2.75e-111
ENSG00000143641	GALNT2	1.02983	1.9e-24
ENSG00000143816	WNT9A	-1.0579	2.15e-06
ENSG00000143842	SOX13	-1.60606	8.77e-47
ENSG00000143847	PPFIA4	1.6992	2.18e-07
ENSG00000143862	ARL8A	-1.09757	6.27e-31
ENSG00000143867	OSR1	-2.01256	2.1e-19
ENSG00000143878	RHOB	-2.22044	3.68e-132
ENSG00000143889	HNRNPLL	-1.27207	3.59e-48
ENSG00000143971	ETAA1	-1.42729	7.74e-45
ENSG00000144045	DQX1	3.96239	1.23e-48
ENSG00000144048	DUSP11	-1.11754	3.62e-19
ENSG00000144120	TMEM177	-1.54109	1.01e-24
ENSG00000144339	TMEFF2	1.68808	5.39e-06
ENSG00000144354	CDCA7	-1.12368	2.8e-39
ENSG00000144355	DLX1	1.38188	1.53e-16
ENSG00000144362	PHOSPHO2	-1.16254	6.1e-06
ENSG00000144452	ABCA12	1.63046	1.92e-10
ENSG00000144481	TRPM8	1.04131	0.0481046
ENSG00000144488	ESPNL	1.74847	1.81e-17
ENSG00000144550	CPNE9	3.8531	2.28e-20
ENSG00000144668	ITGA9	1.85103	0.00651704
ENSG00000144677	CTDSPL	-1.13951	1.17e-41
ENSG00000144712	CAND2	-1.29304	0.000669681
ENSG00000144837	PLA1A	1.78135	6.22e-11
ENSG00000145198	VWA5B2	-1.05393	4.19e-08
ENSG00000145241	CENPC	-1.53448	5.48e-26
ENSG00000145244	CORIN	3.7831	5.67e-09
ENSG00000145246	ATP10D	1.09405	9.61e-23
ENSG00000145358	DDIT4L	-1.31072	6.35e-13
ENSG00000145362	ANK2	1.52219	7.07e-23
ENSG00000145365	TIFA	-1.0611	2.81e-13
ENSG00000145388	METTL14	-1.33917	1.92e-32
ENSG00000145390	USP53	-1.24922	6.14e-17
ENSG00000145536	ADAMTS16	2.01117	3.87e-17
ENSG00000145569	OTULINL	1.02281	5.15e-09
ENSG00000145632	PLK2	-1.85575	7.14e-120
ENSG00000145700	ANKRD31	1.11036	0.0336487
ENSG00000145723	GIN1	-1.00713	1.32e-10
ENSG00000145861	C1QTNF2	2.81745	2.22e-13
ENSG00000145911	N4BP3	-1.3844	0.00036224
ENSG00000146094	DOK3	2.12332	1.52e-70
ENSG00000146221	TCTE1	2.24337	2.74e-05
ENSG00000146243	IRAK1BP1	-1.30349	2.71e-09
ENSG00000146376	ARHGAP18	-1.6653	1.46e-85
ENSG00000146453	PNLDC1	2.74954	1.81e-08
ENSG00000146826	C7orf43	-1.40736	4.39e-21
ENSG00000146834	MEPCE	-1.14926	4.08e-33
ENSG00000146859	TMEM140	3.93199	1.21e-68
ENSG00000146872	TLK2	-1.00968	2.05e-27
ENSG00000146950	SHROOM2	-1.12297	1.19e-06
ENSG00000147082	CCNB3	1.1417	4.11e-07
ENSG00000147166	ITGB1BP2	1.23566	2.83e-10
ENSG00000147174	GCNA	2.61983	2.01e-54
ENSG00000147255	IGSF1	1.46438	5.66e-27
ENSG00000147383	NSDHL	-1.04154	2.85e-31
ENSG00000147573	TRIM55	3.84967	3.16e-19
ENSG00000147642	SYBU	-1.25249	4.09e-18
ENSG00000147649	MTDH	1.00121	1.26e-23
ENSG00000147676	MAL2	2.53287	1.94e-07
ENSG00000147684	NDUFB9	1.01344	3.92e-39
ENSG00000147697	GSDMC	3.68689	3.37e-09
ENSG00000147852	VLDLR	1.17877	1.05e-23
ENSG00000147873	IFNA5	8.77364	5.48e-60
ENSG00000148123	PLPPR1	-1.1395	1.57e-05
ENSG00000148175	STOM	1.0159	1.64e-20
ENSG00000148200	NR6A1	-1.39888	1.81e-15
ENSG00000148331	ASB6	-1.04203	2.22e-21
ENSG00000148677	ANKRD1	-1.8744	2.83e-08
ENSG00000148702	HABP2	-1.09143	1.58e-09
ENSG00000148735	PLEKHS1	4.43231	8.73e-57
ENSG00000148832	PAOX	-1.88556	2.08e-19
ENSG00000148848	ADAM12	1.01839	1.54e-13
ENSG00000149131	SERPING1	4.26452	5.84e-51
ENSG00000149289	ZC3H12C	-1.09685	6.39e-11
ENSG00000149308	NPAT	-1.24862	1.79e-24
ENSG00000149328	GLB1L2	1.03197	9.48e-06
ENSG00000149418	ST14	1.35384	0.0433199
ENSG00000149564	ESAM	1.1631	2.15e-12
ENSG00000149582	TMEM25	1.48385	1.8e-05
ENSG00000149591	TAGLN	1.31646	1.1e-34
ENSG00000149596	JPH2	-1.53114	5.7e-10
ENSG00000149781	FERMT3	3.8096	2.51e-213
ENSG00000149798	CDC42EP2	-1.65265	5.98e-41
ENSG00000149970	CNKSR2	-1.34937	6.73e-34
ENSG00000150093	ITGB1	1.02655	3.68e-45
ENSG00000150165	NA	1.31558	3.68e-09
ENSG00000150347	ARID5B	-1.72517	5.46e-23
ENSG00000150510	FAM124A	-1.1253	1.34e-05
ENSG00000150540	HNMT	-1.19274	1.38e-10
ENSG00000150594	ADRA2A	-1.10335	0.00859849
ENSG00000150636	CCDC102B	1.45895	2.31e-05
ENSG00000150667	FSIP1	-1.49152	1.05e-05
ENSG00000150764	DIXDC1	-1.18126	8.52e-19
ENSG00000150907	FOXO1	-1.48756	5.19e-22
ENSG00000150961	SEC24D	1.19172	5.34e-46
ENSG00000151023	ENKUR	2.4286	5.07e-08
ENSG00000151065	DCP1B	-1.06537	5.22e-15
ENSG00000151090	THRB	-1.04609	1.29e-08
ENSG00000151164	RAD9B	1.18338	0.00729301
ENSG00000151304	SRFBP1	-1.34029	4.94e-23
ENSG00000151360	ALLC	5.1674	8.9e-07
ENSG00000151458	ANKRD50	-2.08251	2.71e-92
ENSG00000151631	AKR1C6P	7.8657	1.83e-20
ENSG00000151651	ADAM8	1.15059	1.69e-26
ENSG00000151790	TDO2	1.83557	2.65e-15
ENSG00000151881	TMEM267	1.14414	5.87e-35
ENSG00000151882	CCL28	1.03179	0.0458241
ENSG00000151917	BEND6	1.12029	6.63e-07
ENSG00000151929	BAG3	1.06777	7.66e-31
ENSG00000152076	CCDC74B	1.7794	7.35e-37
ENSG00000152133	GPATCH11	-1.60011	2.25e-38
ENSG00000152154	TMEM178A	1.63685	0.00108656
ENSG00000152229	PSTPIP2	3.65553	3.63e-13
ENSG00000152315	KCNK13	4.54279	2.03e-09
ENSG00000152359	POC5	-1.48684	5.41e-26
ENSG00000152377	SPOCK1	1.18361	7.03e-43
ENSG00000152382	TADA1	-1.03219	2.1e-17
ENSG00000152433	ZNF547	3.12455	3.78e-34
ENSG00000152464	RPP38	-1.14364	1.35e-25
ENSG00000152503	TRIM36	2.10397	1.93e-07
ENSG00000152689	RASGRP3	2.15334	1.54e-45
ENSG00000152749	GPR180	1.00011	6.35e-14
ENSG00000152766	ANKRD22	-1.31106	0.00188013
ENSG00000152778	IFIT5	1.58088	2.13e-69
ENSG00000152804	HHEX	-1.13358	4.97e-37
ENSG00000152926	ZNF117	1.3693	4.01e-09
ENSG00000153234	NR4A2	-1.12254	2.72e-30
ENSG00000153294	ADGRF4	1.74245	2.26e-58
ENSG00000153363	LINC00467	1.52163	1.18e-22
ENSG00000153495	TEX29	3.68321	7.07e-10
ENSG00000153666	NA	3.01639	0.00459413
ENSG00000153714	LURAP1L	-1.08791	8.83e-23
ENSG00000153721	CNKSR3	-1.24958	3.29e-17
ENSG00000153814	JAZF1	-1.08544	3.43e-09
ENSG00000153975	ZUP1	-1.05924	3.73e-14
ENSG00000153993	SEMA3D	3.2263	3.62e-06
ENSG00000154035	NA	-1.55153	5.66e-36
ENSG00000154124	OTULIN	-1.04635	3.81e-27
ENSG00000154175	ABI3BP	2.97818	4.58e-18
ENSG00000154258	ABCA9	4.14797	7.12e-08
ENSG00000154263	ABCA10	1.47443	0.000349155
ENSG00000154310	TNIK	-1.19676	2.04e-11
ENSG00000154447	SH3RF1	-1.33725	5.06e-36
ENSG00000154556	SORBS2	1.56974	6.17e-07
ENSG00000154589	LY96	2.24662	4.51e-05
ENSG00000154768	NA	1.5278	0.00140144
ENSG00000154781	CCDC174	-1.88075	1.05e-48
ENSG00000154783	FGD5	1.13229	0.0157504
ENSG00000154822	PLCL2	-1.34982	6.38e-24
ENSG00000155034	FBXL18	-1.5178	5.55e-32
ENSG00000155093	PTPRN2	1.17896	4.85e-18
ENSG00000155099	PIP4P2	-1.28208	2e-16
ENSG00000155252	PI4K2A	-1.15904	4.81e-33
ENSG00000155304	HSPA13	1.00905	3.81e-28
ENSG00000155307	SAMSN1	4.86292	3.46e-05
ENSG00000155330	C16orf87	-1.06577	6.63e-15
ENSG00000155629	PIK3AP1	2.04165	9.9e-13
ENSG00000155640	NA	-1.11309	5.66e-09
ENSG00000155749	ALS2CR12	1.71383	0.00228793
ENSG00000155868	MED7	-1.20987	2.5e-21
ENSG00000155961	RAB39B	1.54284	1.28e-22
ENSG00000155962	CLIC2	2.95255	2.99e-08
ENSG00000155970	MICU3	-1.15001	1.63e-07
ENSG00000155980	KIF5A	1.05859	1.4e-06
ENSG00000156050	FAM161B	-1.35601	1.3e-10
ENSG00000156194	PPEF2	8.06952	1.08e-25
ENSG00000156273	BACH1	-1.64761	7.22e-58
ENSG00000156427	FGF18	3.83981	9.33e-23
ENSG00000156509	FBXO43	-1.09658	3.56e-12
ENSG00000156587	UBE2L6	1.97094	6.26e-40
ENSG00000157017	GHRL	1.72547	0.00322611
ENSG00000157227	MMP14	1.63968	8.64e-48
ENSG00000157315	TMED6	3.0084	0.000161084
ENSG00000157540	DYRK1A	-1.06669	8.29e-30
ENSG00000157601	MX1	9.0374	0
ENSG00000157680	DGKI	5.39512	2.67e-10
ENSG00000157851	DPYSL5	-1.51724	3.68e-35
ENSG00000157856	DRC1	1.86633	5.62e-06
ENSG00000157881	PANK4	-1.00619	5.91e-17
ENSG00000157884	CIB4	3.11495	1.6e-06
ENSG00000157927	RADIL	-1.00293	4.37e-06
ENSG00000158023	WDR66	1.66093	2.21e-11
ENSG00000158050	DUSP2	2.55819	4.08e-05
ENSG00000158055	GRHL3	-1.67294	2.58e-11
ENSG00000158092	NCK1	-1.20817	3.5e-24
ENSG00000158163	DZIP1L	-1.13628	1.7e-10
ENSG00000158292	GPR153	-1.084	2.05e-07
ENSG00000158517	NCF1	2.31041	0.00157094
ENSG00000158571	PFKFB1	2.09887	6.4e-05
ENSG00000158615	PPP1R15B	-1.07088	1.6e-31
ENSG00000158792	SPATA2L	-2.34955	2.63e-62
ENSG00000158869	FCER1G	3.98576	2.93e-09
ENSG00000158882	TOMM40L	-1.23058	2.72e-18
ENSG00000159164	SV2A	6.11717	3.52e-96
ENSG00000159167	STC1	-1.4836	2.32e-28
ENSG00000159182	PRAC1	3.41897	5.88e-05
ENSG00000159208	CIART	-1.06739	0.0486278
ENSG00000159251	ACTC1	9.1172	3.24e-112
ENSG00000159314	ARHGAP27	-1.04767	1.29e-26
ENSG00000159399	HK2	1.1298	0.0042107
ENSG00000159403	C1R	2.33391	3.58e-97
ENSG00000159433	STARD9	-1.77732	6.1e-31
ENSG00000159556	ISL2	-1.0102	1.22e-07
ENSG00000159625	DRC7	1.86231	3.63e-08
ENSG00000159708	LRRC36	-1.35431	0.0185618
ENSG00000159753	CARMIL2	1.02361	6.56e-09
ENSG00000159788	RGS12	-1.205	2.98e-31
ENSG00000159792	PSKH1	-1.05949	4.05e-30
ENSG00000159899	NPR2	1.82039	8.59e-45
ENSG00000159921	GNE	-1.28104	5.9e-51
ENSG00000160050	CCDC28B	1.33221	9.51e-10
ENSG00000160161	CILP2	1.38671	4.07e-08
ENSG00000160179	ABCG1	-1.46554	3.01e-38
ENSG00000160182	TFF1	1.50867	4.59e-12
ENSG00000160188	RSPH1	1.19022	0.000467936
ENSG00000160200	CBS	1.44386	1.31e-65
ENSG00000160214	RRP1	-1.068	2.58e-27
ENSG00000160233	LRRC3	-1.62768	7.12e-07
ENSG00000160285	LSS	-1.35441	1.44e-62
ENSG00000160318	CLDND2	1.1673	1.04e-11
ENSG00000160392	C19orf47	-1.32521	1.85e-33
ENSG00000160396	HIPK4	-1.21299	0.0141394
ENSG00000160439	RDH13	-1.07012	2.38e-12
ENSG00000160469	BRSK1	-1.80917	1.78e-27
ENSG00000160710	ADAR	1.39695	2.56e-78
ENSG00000160716	CHRNB2	1.06905	0.000129358
ENSG00000160799	CCDC12	-1.25529	2.21e-29
ENSG00000160801	PTH1R	-2.27374	0.00232416
ENSG00000160908	ZNF394	-1.05313	7.19e-18
ENSG00000160932	LY6E	1.13697	7.28e-28
ENSG00000160951	PTGER1	3.96349	7.31e-05
ENSG00000160993	ALKBH4	-1.10981	1.7e-16
ENSG00000161021	MAML1	-1.21841	8.85e-43
ENSG00000161048	NAPEPLD	-1.21329	1.92e-15
ENSG00000161082	CELF5	-1.07139	2.61e-05
ENSG00000161180	CCDC116	3.73652	2.13e-07
ENSG00000161243	FBXO27	-1.04186	5.2e-06
ENSG00000161395	PGAP3	1.07942	1.29e-10
ENSG00000161509	GRIN2C	2.25241	3.67e-18
ENSG00000161570	NA	9.25557	9.05e-172
ENSG00000161649	CD300LG	5.64233	6.09e-20
ENSG00000161653	NAGS	-1.42421	0.000530413
ENSG00000161681	SHANK1	2.4639	2.89e-05
ENSG00000161791	FMNL3	-1.0602	3.06e-12
ENSG00000161860	SYCE2	2.1098	6.73e-07
ENSG00000161944	ASGR2	1.52111	0.0216252
ENSG00000162009	SSTR5	-2.10325	1.05e-13
ENSG00000162139	NEU3	-1.05959	2.25e-09
ENSG00000162241	SLC25A45	-1.16665	1.03e-24
ENSG00000162366	PDZK1IP1	1.50299	3.23e-20
ENSG00000162377	COA7	-1.31633	5.68e-26
ENSG00000162396	PARS2	-1.56752	3.39e-15
ENSG00000162409	PRKAA2	-1.13888	4.95e-31
ENSG00000162413	KLHL21	-1.20993	1.84e-38
ENSG00000162438	CTRC	1.90168	0.00172095
ENSG00000162461	SLC25A34	3.06825	1.81e-55
ENSG00000162576	MXRA8	5.0511	1.55e-06
ENSG00000162595	DIRAS3	1.25181	0.000565539
ENSG00000162624	LHX8	-1.35544	1.39e-11
ENSG00000162669	HFM1	1.01926	0.0327019
ENSG00000162702	ZNF281	-1.60973	7.15e-83
ENSG00000162733	DDR2	2.42011	4.77e-17
ENSG00000162757	C1orf74	-1.55754	9.31e-09
ENSG00000162775	RBM15	-1.50228	1.29e-35
ENSG00000162840	MT2P1	1.6742	8.34e-10
ENSG00000162878	PKDCC	-1.09323	7.19e-24
ENSG00000162924	REL	-1.37375	3.12e-14
ENSG00000162946	DISC1	-1.07459	1.04e-05
ENSG00000162975	KCNF1	-1.01701	2.42e-05
ENSG00000162998	FRZB	6.08747	1.46e-57
ENSG00000163016	ALMS1P1	2.21137	0.00149855
ENSG00000163026	WDCP	-1.28228	2.41e-35
ENSG00000163053	SLC16A14	1.12874	4.46e-05
ENSG00000163072	NOSTRIN	-1.77617	6.46e-50
ENSG00000163075	CFAP221	2.37144	0.00291639
ENSG00000163113	NA	-1.39134	1.85e-39
ENSG00000163125	RPRD2	-1.0204	3.02e-28
ENSG00000163141	BNIPL	1.96886	3.55e-11
ENSG00000163155	LYSMD1	-1.34192	4.76e-11
ENSG00000163263	C1orf189	3.8945	1.03e-06
ENSG00000163283	ALPP	4.19013	1.73e-11
ENSG00000163312	HELQ	-1.14425	2.53e-14
ENSG00000163359	COL6A3	4.74447	2.5e-92
ENSG00000163362	INAVA	-1.17509	7.29e-44
ENSG00000163378	EOGT	1.0072	5.8e-23
ENSG00000163406	SLC15A2	1.08558	0.000628092
ENSG00000163430	FSTL1	1.24577	6.12e-55
ENSG00000163453	IGFBP7	1.05811	1.62e-32
ENSG00000163479	SSR2	1.17525	3.04e-16
ENSG00000163485	ADORA1	-1.71464	0.0027055
ENSG00000163508	EOMES	-1.51984	6.42e-05
ENSG00000163513	TGFBR2	-1.15466	5.35e-44
ENSG00000163517	HDAC11	-1.22729	6.98e-26
ENSG00000163520	FBLN2	2.26048	1.22e-11
ENSG00000163536	SERPINI1	1.72159	8.15e-21
ENSG00000163565	IFI16	4.33926	3.18e-126
ENSG00000163584	RPL22L1	1.08	4.6e-14
ENSG00000163606	CD200R1	6.97764	4.1e-30
ENSG00000163611	SPICE1	-1.28934	4.13e-28
ENSG00000163631	ALB	4.40953	3.32e-41
ENSG00000163637	PRICKLE2	-1.04577	2.29e-23
ENSG00000163644	PPM1K	3.69335	2.89e-161
ENSG00000163645	ERICH6	1.75411	0.0117795
ENSG00000163661	PTX3	1.43914	0.0365297
ENSG00000163701	IL17RE	1.92907	6.78e-18
ENSG00000163736	PPBP	6.64968	2.52e-41
ENSG00000163737	PF4	1.95317	7.57e-10
ENSG00000163746	PLSCR2	5.32146	3.64e-29
ENSG00000163803	PLB1	1.22219	0.00108257
ENSG00000163806	SPDYA	3.5814	6.16e-25
ENSG00000163840	DTX3L	3.54637	0
ENSG00000163909	HEYL	-1.41241	1.14e-17
ENSG00000163914	RHO	2.16255	0.00218208
ENSG00000163961	RNF168	-1.41221	2.8e-28
ENSG00000163993	S100P	1.49546	8.01e-27
ENSG00000163995	ABLIM2	-1.76368	1.04e-05
ENSG00000164002	EXO5	-1.18772	2.56e-09
ENSG00000164010	ERMAP	1.10803	5.8e-30
ENSG00000164011	ZNF691	-1.12477	6.53e-16
ENSG00000164056	SPRY1	-1.16987	6.81e-10
ENSG00000164076	CAMKV	-1.3026	0.0169521
ENSG00000164082	GRM2	7.49965	5.66e-122
ENSG00000164122	ASB5	6.27068	2.78e-18
ENSG00000164175	SLC45A2	5.70944	1.36e-08
ENSG00000164220	F2RL2	1.45658	5.15e-13
ENSG00000164294	GPX8	1.69225	4.38e-100
ENSG00000164296	TIGD6	-1.65278	3.36e-23
ENSG00000164308	ERAP2	2.23064	4.52e-26
ENSG00000164309	CMYA5	2.79978	2.42e-09
ENSG00000164338	UTP15	-1.01488	4.51e-21
ENSG00000164342	TLR3	3.75053	3.51e-108
ENSG00000164344	KLKB1	3.62293	2.73e-12
ENSG00000164379	FOXQ1	-2.31923	4.39e-28
ENSG00000164404	GDF9	3.00471	7.83e-38
ENSG00000164488	DACT2	-1.38435	1.57e-07
ENSG00000164543	STK17A	-1.04903	8.21e-26
ENSG00000164556	FAM183BP	6.89422	8.18e-40
ENSG00000164591	MYOZ3	2.73055	6.28e-07
ENSG00000164626	KCNK5	-2.45303	2.02e-69
ENSG00000164683	HEY1	1.5633	1.34e-13
ENSG00000164733	CTSB	1.34252	3.05e-24
ENSG00000164776	PHKG1	1.70691	0.000115607
ENSG00000164823	OSGIN2	-1.11858	2.76e-44
ENSG00000164825	DEFB1	1.9862	4.39e-12
ENSG00000164920	OSR2	-1.1997	5.82e-06
ENSG00000164938	TP53INP1	-1.01668	4.19e-23
ENSG00000164951	PDP1	-1.15202	1.23e-19
ENSG00000164972	C9orf24	1.5772	8.08e-05
ENSG00000165025	SYK	1.20303	0.0306231
ENSG00000165030	NFIL3	-1.29716	1.58e-09
ENSG00000165188	RNF183	2.30819	1.21e-06
ENSG00000165197	VEGFD	2.48254	2.44e-57
ENSG00000165323	FAT3	1.10149	1.46e-09
ENSG00000165355	FBXO33	-1.10163	1.37e-20
ENSG00000165388	NA	-1.43964	3.86e-14
ENSG00000165424	ZCCHC24	-1.04344	9.33e-19
ENSG00000165449	SLC16A9	1.54975	5.37e-06
ENSG00000165507	DEPP1	-2.35715	7.03e-07
ENSG00000165526	RPUSD4	-1.03829	9.38e-26
ENSG00000165527	ARF6	-1.16321	6.56e-42
ENSG00000165794	SLC39A2	5.63962	6.71e-16
ENSG00000165805	C12orf50	6.10236	1.28e-09
ENSG00000165821	SALL2	-1.47955	3.36e-22
ENSG00000165861	ZFYVE1	-1.71234	3.32e-47
ENSG00000165863	C10orf82	2.77332	2.84e-10
ENSG00000165879	FRAT1	-2.07285	4.33e-33
ENSG00000165886	UBTD1	-1.21429	1.65e-24
ENSG00000165887	ANKRD2	2.78855	1.38e-12
ENSG00000165895	ARHGAP42	-1.09319	4.03e-20
ENSG00000165912	PACSIN3	-1.14649	2.43e-29
ENSG00000165917	RAPSN	1.15239	0.00604945
ENSG00000165949	IFI27	4.78638	7.48e-207
ENSG00000165972	CCDC38	2.34481	2.92e-09
ENSG00000165996	HACD1	1.10334	1.89e-35
ENSG00000166016	ABTB2	-1.11605	9.28e-33
ENSG00000166024	R3HCC1L	-1.0922	2.93e-22
ENSG00000166068	SPRED1	-1.18557	2.2e-33
ENSG00000166143	PPP1R14D	2.00846	0.0497509
ENSG00000166169	POLL	-1.05828	1.16e-27
ENSG00000166188	ZNF319	-1.3559	5.32e-38
ENSG00000166189	HPS6	-1.6655	1.35e-60
ENSG00000166224	SGPL1	1.00952	7.69e-29
ENSG00000166268	MYRFL	4.04086	3.01e-19
ENSG00000166278	C2	1.80582	0.000346303
ENSG00000166289	PLEKHF1	-1.61842	3.54e-16
ENSG00000166341	DCHS1	2.222	4.58e-26
ENSG00000166343	MSS51	1.62082	1.03e-08
ENSG00000166359	WDR88	1.53631	0.000446624
ENSG00000166387	PPFIBP2	-1.41177	1.92e-52
ENSG00000166396	SERPINB7	1.84895	5.48e-16
ENSG00000166439	RNF169	-1.57682	4.45e-48
ENSG00000166446	CDYL2	-1.06853	0.0157024
ENSG00000166473	PKD1L2	-1.23634	5.04e-28
ENSG00000166484	MAPK7	-1.43148	9.4e-38
ENSG00000166523	CLEC4E	1.79225	4.58e-05
ENSG00000166529	ZSCAN21	-1.29574	2.86e-22
ENSG00000166562	SEC11C	1.16791	6.73e-13
ENSG00000166569	CPLX4	8.62971	3.89e-43
ENSG00000166589	CDH16	1.49532	5.87e-12
ENSG00000166592	RRAD	4.56576	1.67e-65
ENSG00000166710	B2M	1.97107	3.89e-53
ENSG00000166743	ACSM1	5.33538	4.22e-07
ENSG00000166793	YPEL4	-2.6602	0.000488723
ENSG00000166794	PPIB	1.39915	2.29e-14
ENSG00000166796	LDHC	5.44114	3.99e-10
ENSG00000166816	LDHD	-1.26113	4.27e-06
ENSG00000166823	MESP1	-1.06474	4.53e-07
ENSG00000166831	RBPMS2	-1.17919	2.44e-15
ENSG00000166860	ZBTB39	-1.46598	1.35e-34
ENSG00000166863	TAC3	3.57119	1.88e-21
ENSG00000166886	NAB2	-1.32203	1.71e-29
ENSG00000166900	STX3	-1.14957	2.85e-29
ENSG00000166917	MIR202HG	6.08351	2.21e-09
ENSG00000166920	C15orf48	2.38669	3.25e-16
ENSG00000166923	GREM1	1.1253	5.96e-28
ENSG00000166924	NYAP1	-1.66481	6.05e-07
ENSG00000166979	EVA1C	-1.33366	4.24e-41
ENSG00000167004	PDIA3	1.11737	2.08e-14
ENSG00000167037	SGSM1	-1.38685	7.44e-12
ENSG00000167065	DUSP18	-1.01282	1.82e-06
ENSG00000167080	B4GALNT2	1.36517	0.000743607
ENSG00000167103	PIP5KL1	1.50202	3.41e-09
ENSG00000167173	C15orf39	-1.81104	1.46e-89
ENSG00000167183	PRR15L	-1.53013	1.95e-05
ENSG00000167207	NOD2	4.17718	6.91e-08
ENSG00000167258	CDK12	-1.24889	1.02e-51
ENSG00000167311	ART5	1.54773	0.0080844
ENSG00000167395	ZNF646	-1.22111	1.56e-35
ENSG00000167487	KLHL26	-1.45266	1.09e-16
ENSG00000167508	MVD	-2.24875	2.8e-135
ENSG00000167528	ZNF641	-1.00001	3.87e-21
ENSG00000167535	CACNB3	-1.07524	5.82e-29
ENSG00000167566	NCKAP5L	-1.65129	5.06e-61
ENSG00000167588	GPD1	1.94539	3.72e-17
ENSG00000167595	PROSER3	-1.03184	3.52e-25
ENSG00000167604	NFKBID	-1.65077	8.07e-17
ENSG00000167625	ZNF526	-1.58503	4.05e-49
ENSG00000167637	ZNF283	-1.1039	3.77e-09
ENSG00000167644	C19orf33	1.12425	5.11e-06
ENSG00000167657	DAPK3	-1.16173	2.09e-27
ENSG00000167674	HDGFL2	-1.11232	4.13e-34
ENSG00000167701	GPT	1.22924	8.65e-06
ENSG00000167771	RCOR2	-1.59711	1.61e-10
ENSG00000167775	CD320	1.01131	3.13e-08
ENSG00000167779	IGFBP6	1.16	2.29e-14
ENSG00000167780	SOAT2	3.99387	4.7e-27
ENSG00000167800	TBX10	3.82181	0.00080879
ENSG00000167840	ZNF232	-1.09555	1.36e-12
ENSG00000167851	CD300A	3.78029	5.71e-09
ENSG00000167880	EVPL	-1.79249	3.07e-69
ENSG00000167895	TMC8	-1.21053	0.0190103
ENSG00000167941	SOST	3.87707	1.05e-06
ENSG00000168000	BSCL2	1.67412	2.81e-19
ENSG00000168003	SLC3A2	1.98824	3.37e-21
ENSG00000168010	ATG16L2	-1.1599	2.15e-24
ENSG00000168016	TRANK1	2.55996	1.03e-162
ENSG00000168040	FADD	-1.11558	1.41e-34
ENSG00000168062	BATF2	5.53925	0
ENSG00000168067	MAP4K2	-1.008	2.85e-20
ENSG00000168116	KIAA1586	-1.81263	2.31e-22
ENSG00000168140	VASN	-1.01167	1.03e-22
ENSG00000168264	IRF2BP2	-1.61215	4.66e-95
ENSG00000168314	MOBP	6.42708	2.32e-09
ENSG00000168329	CX3CR1	3.47975	1.44e-31
ENSG00000168386	FILIP1L	-3.09827	8.76e-06
ENSG00000168394	TAP1	3.20012	9.98e-250
ENSG00000168398	BDKRB2	-1.26513	7.7e-50
ENSG00000168404	MLKL	1.4268	1.17e-52
ENSG00000168412	MTNR1A	1.39685	0.00910866
ENSG00000168421	RHOH	3.51787	3.1e-20
ENSG00000168497	CAVIN2	1.12803	6.81e-33
ENSG00000168505	GBX2	-1.35978	4.54e-05
ENSG00000168517	HEXIM2	-1.34936	1.09e-33
ENSG00000168546	GFRA2	2.74838	1.88e-08
ENSG00000168564	CDKN2AIP	-1.37396	2.93e-28
ENSG00000168612	ZSWIM1	-1.36126	9.28e-19
ENSG00000168672	FAM84B	1.2707	5.5e-25
ENSG00000168676	KCTD19	-1.62992	7.62e-06
ENSG00000168743	NPNT	1.14104	1.8e-05
ENSG00000168806	LCMT2	-1.10067	3.13e-16
ENSG00000168874	ATOH8	-1.27246	2.4e-12
ENSG00000168918	INPP5D	1.33884	1.01e-05
ENSG00000168961	LGALS9	3.33648	1.47e-49
ENSG00000168993	CPLX1	1.64326	0.00411213
ENSG00000169020	ATP5ME	1.00458	3.02e-14
ENSG00000169047	IRS1	-1.11358	1.13e-42
ENSG00000169085	VXN	2.63407	2.22e-21
ENSG00000169122	FAM110B	-1.39683	0.00643363
ENSG00000169174	PCSK9	-1.65558	1.08e-91
ENSG00000169194	IL13	7.23561	6.39e-67
ENSG00000169220	RGS14	-1.56358	9.34e-21
ENSG00000169223	LMAN2	1.04237	7.75e-17
ENSG00000169245	CXCL10	9.44189	3.11e-93
ENSG00000169251	NMD3	-1.14401	1.15e-37
ENSG00000169253	ENSG00000169253	1.34506	0.00550681
ENSG00000169258	GPRIN1	-1.54789	2.28e-32
ENSG00000169403	PTAFR	2.47358	2.01e-21
ENSG00000169418	NPR1	-1.02683	0.000235163
ENSG00000169499	PLEKHA2	-1.00746	1.29e-16
ENSG00000169507	SLC38A11	-1.28722	0.0210561
ENSG00000169635	HIC2	-1.35507	8.96e-18
ENSG00000169641	LUZP1	-1.25644	2.98e-45
ENSG00000169710	FASN	-1.82764	1.1e-127
ENSG00000169750	RAC3	1.21211	1.48e-31
ENSG00000169891	REPS2	-1.33549	2.15e-15
ENSG00000169896	ITGAM	1.26281	2.12e-13
ENSG00000169951	ZNF764	-1.42513	1.1e-17
ENSG00000169981	ZNF35	-1.16621	8.26e-08
ENSG00000170049	KCNAB3	1.17614	2.24e-18
ENSG00000170099	SERPINA6	1.08211	7.86e-05
ENSG00000170100	ZNF778	-1.25952	1.21e-11
ENSG00000170122	FOXD4	2.35274	3.35e-23
ENSG00000170191	NANP	-1.41721	1.5e-36
ENSG00000170231	FABP6	1.52007	0.0128337
ENSG00000170234	PWWP2A	-1.22293	5.73e-27
ENSG00000170265	ZNF282	-1.27829	1.45e-42
ENSG00000170271	FAXDC2	1.19448	8.34e-05
ENSG00000170290	SLN	1.24658	0.00590219
ENSG00000170348	TMED10	1.26681	1.17e-28
ENSG00000170374	SP7	2.12772	2.24e-09
ENSG00000170379	TCAF2	1.98279	0.00238291
ENSG00000170442	KRT86	1.05755	8.53e-32
ENSG00000170458	CD14	2.31522	3.37e-56
ENSG00000170498	KISS1	1.95962	9.74e-05
ENSG00000170581	STAT2	2.65707	7.53e-240
ENSG00000170608	FOXA3	-1.31142	1.25e-20
ENSG00000170631	ZNF16	-1.04256	8.07e-12
ENSG00000170647	NA	-1.0755	3.4e-12
ENSG00000170677	SOCS6	-1.50978	1.11e-50
ENSG00000170779	CDCA4	-1.45371	4.34e-49
ENSG00000170801	HTRA3	1.67234	1.23e-29
ENSG00000170835	CEL	1.47223	2.55e-12
ENSG00000170837	GPR27	1.21837	2.94e-13
ENSG00000170903	MSANTD4	-1.15442	6.47e-25
ENSG00000170965	PLAC1	2.92048	3.55e-22
ENSG00000171017	LRRC8E	-1.41878	3.36e-21
ENSG00000171115	GIMAP8	6.90431	5.94e-13
ENSG00000171150	SOCS5	-1.81813	2.71e-88
ENSG00000171161	ZNF672	-1.29705	6.95e-34
ENSG00000171206	TRIM8	-1.04472	2.05e-31
ENSG00000171224	FAM241B	-1.28255	4.18e-25
ENSG00000171227	TMEM37	-1.1417	1.83e-28
ENSG00000171234	UGT2B7	1.06681	0.000359371
ENSG00000171236	LRG1	1.55777	8.56e-05
ENSG00000171246	NPTX1	1.06395	7.12e-37
ENSG00000171316	CHD7	-1.11869	1.33e-26
ENSG00000171425	ZNF581	-1.21579	5.19e-20
ENSG00000171446	KRT27	3.88737	0.00139813
ENSG00000171453	POLR1C	-1.20212	2.62e-28
ENSG00000171466	ZNF562	-1.04891	7.38e-17
ENSG00000171540	OTP	2.40237	4.54e-05
ENSG00000171552	BCL2L1	-1.17503	1.06e-53
ENSG00000171557	FGG	1.81604	5.02e-29
ENSG00000171560	FGA	1.01632	4.81e-11
ENSG00000171564	FGB	1.54244	5.76e-39
ENSG00000171574	ZNF584	-1.4837	5.85e-35
ENSG00000171604	CXXC5	-1.74136	7.41e-75
ENSG00000171608	PIK3CD	-1.25921	7.94e-25
ENSG00000171621	SPSB1	-1.114	4.06e-34
ENSG00000171747	LGALS4	2.12919	6.45e-44
ENSG00000171786	NHLH1	2.98353	4.5e-41
ENSG00000171813	PWWP2B	-1.14413	1.86e-18
ENSG00000171840	NINJ2	1.0969	0.0058779
ENSG00000171843	MLLT3	-1.11572	6.3e-33
ENSG00000171847	FAM90A1	2.95005	1.67e-06
ENSG00000171848	RRM2	-1.17991	9.27e-50
ENSG00000171867	PRNP	1.17567	2.53e-21
ENSG00000171872	KLF17	4.31798	2.42e-08
ENSG00000171877	FRMD5	-1.10377	9.09e-09
ENSG00000171931	FBXW10	2.8912	1.79e-233
ENSG00000171960	PPIH	1.10649	1.44e-19
ENSG00000171992	SYNPO	-1.11601	2.73e-43
ENSG00000172031	EPHX4	1.13685	0.00433252
ENSG00000172061	LRRC15	3.21589	0.00591747
ENSG00000172137	CALB2	1.10266	8.06e-07
ENSG00000172159	FRMD3	-1.03566	5.42e-08
ENSG00000172175	MALT1	-1.11013	4.13e-34
ENSG00000172183	ISG20	1.24607	4.52e-40
ENSG00000172216	CEBPB	-1.54973	8.67e-78
ENSG00000172232	AZU1	2.02044	1.01e-22
ENSG00000172270	BSG	1.00426	4.19e-12
ENSG00000172315	TP53RK	-1.61048	7.13e-41
ENSG00000172339	ALG14	1.08059	4.19e-24
ENSG00000172349	IL16	5.02592	2.09e-14
ENSG00000172458	IL17D	1.01595	0.00206818
ENSG00000172543	CTSW	5.20558	2.47e-08
ENSG00000172748	ZNF596	3.37573	2.37e-120
ENSG00000172771	EFCAB12	-1.37024	1.45e-08
ENSG00000172794	RAB37	-1.11843	4.22e-40
ENSG00000172818	OVOL1	5.2233	9.01e-14
ENSG00000172840	PDP2	-1.535	8.22e-28
ENSG00000172845	SP3	-1.11101	2.12e-42
ENSG00000172901	LVRN	3.42294	1.94e-05
ENSG00000172936	MYD88	1.84617	1.47e-97
ENSG00000173013	CCDC96	-1.85178	1.49e-08
ENSG00000173041	ZNF680	-1.01668	2.38e-08
ENSG00000173065	FAM222B	-1.81584	3.94e-66
ENSG00000173085	COQ2	1.10623	5.49e-20
ENSG00000173110	HSPA6	7.24425	3.35e-94
ENSG00000173114	LRRN3	3.68575	9.11e-06
ENSG00000173166	RAPH1	-1.97571	1.44e-88
ENSG00000173175	ADCY5	-1.06373	6.02e-17
ENSG00000173193	PARP14	2.95039	1.62e-164
ENSG00000173200	PARP15	7.93311	4.62e-100
ENSG00000173237	C11orf86	-1.79845	1.23e-13
ENSG00000173261	PLAC8L1	2.40221	9.09e-13
ENSG00000173281	PPP1R3B	-1.85909	2.45e-53
ENSG00000173451	THAP2	1.40356	6.68e-09
ENSG00000173517	PEAK1	-1.16347	6.05e-31
ENSG00000173530	TNFRSF10D	1.03544	1.06e-11
ENSG00000173545	ZNF622	-1.13868	1.6e-31
ENSG00000173548	SNX33	-1.70634	1.22e-81
ENSG00000173566	NA	-1.66321	3.22e-31
ENSG00000173698	ADGRG2	1.4677	1.13e-28
ENSG00000173705	SUSD5	1.02331	1.27e-07
ENSG00000173714	WFIKKN2	8.5463	1.3e-19
ENSG00000173727	ENSG00000173727	-1.18361	5.17e-07
ENSG00000173762	CD7	3.80241	9.49e-11
ENSG00000173801	JUP	-1.44439	5.45e-85
ENSG00000173809	TDRD12	2.11249	1.61e-09
ENSG00000173825	TIGD3	1.1659	9.86e-08
ENSG00000173846	PLK3	-1.84333	1.78e-40
ENSG00000173848	NET1	-1.14429	5.76e-50
ENSG00000173908	KRT28	7.11036	2.04e-13
ENSG00000173917	HOXB2	1.46312	3.6e-19
ENSG00000173928	SWSAP1	-1.14179	1.08e-06
ENSG00000173991	TCAP	1.6406	9.55e-19
ENSG00000174123	TLR10	3.3928	1.24e-19
ENSG00000174276	ZNHIT2	-1.08835	3.96e-15
ENSG00000174292	TNK1	-1.17884	2.93e-07
ENSG00000174306	ZHX3	-1.28616	1.92e-18
ENSG00000174327	SLC16A13	-1.35315	2.55e-40
ENSG00000174371	EXO1	-1.05983	1.49e-22
ENSG00000174460	ZCCHC12	2.87165	4.55e-08
ENSG00000174473	GALNTL6	-1.22681	7.12e-06
ENSG00000174498	IGDCC3	4.47743	7.47e-13
ENSG00000174502	SLC26A9	-1.72948	1.4e-24
ENSG00000174516	PELI3	-2.00225	1.3e-35
ENSG00000174521	TTC9B	5.13727	7.95e-13
ENSG00000174529	TMEM81	1.1594	1.12e-07
ENSG00000174564	IL20RB	1.40451	6.37e-06
ENSG00000174574	AKIRIN1	-1.22749	2.94e-43
ENSG00000174579	MSL2	-1.02336	9.83e-19
ENSG00000174599	TRAM1L1	1.51112	2.61e-10
ENSG00000174669	SLC29A2	-1.99702	1.36e-70
ENSG00000174672	BRSK2	-1.64728	1.74e-24
ENSG00000174705	SH3PXD2B	-1.2137	6.29e-42
ENSG00000174792	ODAPH	3.37525	2.27e-06
ENSG00000174808	BTC	2.01911	3.2e-49
ENSG00000174837	ADGRE1	1.52851	2.02e-35
ENSG00000174871	CNIH2	1.26799	1.1e-05
ENSG00000175003	SLC22A1	1.49589	2.95e-05
ENSG00000175104	TRAF6	-1.21545	3.29e-19
ENSG00000175155	YPEL2	-1.41924	8.59e-23
ENSG00000175170	FAM182B	1.3979	0.00872032
ENSG00000175182	FAM131A	-1.23058	1.6e-17
ENSG00000175264	CHST1	1.71487	3.53e-08
ENSG00000175267	VWA3A	3.78578	3.33e-09
ENSG00000175305	CCNE2	-1.03274	7.67e-08
ENSG00000175311	ANKS4B	-2.55153	1.49e-34
ENSG00000175318	GRAMD2A	5.35817	1.28e-34
ENSG00000175356	SCUBE2	1.79036	2.62e-12
ENSG00000175376	EIF1AD	-1.13389	3.21e-29
ENSG00000175505	CLCF1	-1.05936	1.09e-27
ENSG00000175518	UBQLNL	1.62391	0.0205601
ENSG00000175536	LIPT2	-1.14229	4.09e-07
ENSG00000175538	KCNE3	-2.05502	0.00127827
ENSG00000175564	UCP3	1.50578	2.99e-25
ENSG00000175591	P2RY2	-1.18964	1.3e-07
ENSG00000175697	GPR156	1.53006	0.00128126
ENSG00000175730	BAK1P1	-1.21327	3.97e-07
ENSG00000175832	ETV4	-1.11996	4.1e-48
ENSG00000175911	NA	-1.70496	7.75e-12
ENSG00000175920	DOK7	-1.0199	0.00281751
ENSG00000176024	ZNF613	-1.08934	3.2e-05
ENSG00000176046	NUPR1	1.25808	6.56e-34
ENSG00000176054	RPL23P2	1.78128	0.00064071
ENSG00000176092	CRYBG2	-2.0468	6.42e-06
ENSG00000176222	ZNF404	1.03655	0.00386451
ENSG00000176244	ACBD7	-1.37471	0.000418337
ENSG00000176381	PRR18	1.77059	0.000173619
ENSG00000176399	DMRTA1	-1.8551	1.61e-15
ENSG00000176428	VPS37D	-1.96245	3.38e-34
ENSG00000176438	SYNE3	2.07672	1.75e-06
ENSG00000176595	KBTBD11	-1.01638	2.57e-18
ENSG00000176692	FOXC2	-1.40637	0.00986714
ENSG00000176697	BDNF	-1.37987	5.25e-45
ENSG00000176714	CCDC121	-1.07514	2.84e-10
ENSG00000176723	ZNF843	1.90562	1.35e-05
ENSG00000176749	CDK5R1	2.7302	2.02e-143
ENSG00000176771	NCKAP5	-1.04335	5.41e-13
ENSG00000176826	FKBP9P1	1.19006	1.25e-07
ENSG00000176845	METRNL	-1.41267	1.61e-09
ENSG00000176907	TCIM	-1.63319	9.14e-101
ENSG00000176909	MAMSTR	-1.38175	0.0146958
ENSG00000176919	C8G	1.05953	0.00315527
ENSG00000176928	GCNT4	2.16112	7.53e-12
ENSG00000176994	SMCR8	-1.31399	1.82e-24
ENSG00000177025	C19orf18	3.26011	9e-06
ENSG00000177051	FBXO46	-1.40804	1.2e-40
ENSG00000177181	RIMKLA	-1.33714	5.82e-29
ENSG00000177283	FZD8	-1.30113	1.6e-36
ENSG00000177291	GJD4	3.55291	0.000454105
ENSG00000177303	CASKIN2	-1.26681	7.16e-37
ENSG00000177352	CCDC71	-2.18503	2.31e-38
ENSG00000177359	ENSG00000177359	1.91754	2.55e-06
ENSG00000177363	LRRN4CL	4.83146	1.92e-77
ENSG00000177409	SAMD9L	4.93807	0
ENSG00000177426	TGIF1	-1.13602	7.48e-49
ENSG00000177427	MIEF2	-1.62153	1.37e-37
ENSG00000177483	RBM44	2.13428	5.32e-19
ENSG00000177602	HASPIN	-1.95391	6.11e-43
ENSG00000177613	CSTF2T	-1.01745	5.99e-28
ENSG00000177669	MBOAT4	2.87123	7.81e-15
ENSG00000177679	SRRM3	-1.04738	6.72e-14
ENSG00000177721	ANXA2R	1.48731	4.82e-19
ENSG00000177788	ENSG00000177788	-1.41344	0.0090499
ENSG00000177830	CHID1	1.14843	3.93e-14
ENSG00000177839	PCDHB9	2.52545	0.000707676
ENSG00000177875	CCDC184	-1.57425	5.92e-22
ENSG00000177943	MAMDC4	1.03668	2.82e-25
ENSG00000177946	CENPBD1	-1.39164	2.79e-29
ENSG00000177989	ODF3B	2.02247	6.96e-68
ENSG00000178033	CALHM5	1.58357	0.00115417
ENSG00000178127	NDUFV2	1.16501	1.08e-10
ENSG00000178163	ZNF518B	-1.38128	7.34e-28
ENSG00000178199	ZC3H12D	1.30329	0.022414
ENSG00000178202	KDELC2	1.03884	1.8e-33
ENSG00000178233	TMEM151B	3.60586	5.96e-07
ENSG00000178338	ZNF354B	-1.12813	6.65e-17
ENSG00000178385	PLEKHM3	-1.39805	3.75e-09
ENSG00000178429	RPS3AP5	1.01206	2.3e-09
ENSG00000178462	TUBAL3	-1.83696	0.000141993
ENSG00000178573	MAF	-1.36027	1.85e-05
ENSG00000178662	CSRNP3	1.96762	0.0187443
ENSG00000178685	PARP10	4.72688	8.54e-237
ENSG00000178722	C5orf64	-2.27824	0.00292531
ENSG00000178750	STX19	3.45682	9.67e-10
ENSG00000178764	ZHX2	-1.11207	1.74e-19
ENSG00000178821	TMEM52	-1.38766	0.019405
ENSG00000178826	TMEM139	1.05173	0.000650163
ENSG00000178919	FOXE1	-1.28136	1.97e-13
ENSG00000178935	ZNF552	-1.26357	8.25e-16
ENSG00000178971	CTC1	-1.23324	1.67e-35
ENSG00000178974	FBXO34	-1.05874	6.45e-28
ENSG00000178977	LINC00324	1.09738	0.000848956
ENSG00000179044	EXOC3L1	7.32965	1.57e-17
ENSG00000179046	TRIML2	1.06454	6.49e-14
ENSG00000179148	ALOXE3	1.5304	0.00628015
ENSG00000179168	GGN	-1.75591	0.00579503
ENSG00000179335	CLK3	-1.04583	3.16e-28
ENSG00000179361	ARID3B	-1.62787	7e-19
ENSG00000179363	TMEM31	4.38265	5.12e-15
ENSG00000179409	GEMIN4	-1.43366	5.15e-40
ENSG00000179520	SLC17A8	5.71963	3.44e-21
ENSG00000179546	HTR1D	-1.29893	6.57e-22
ENSG00000179562	GCC1	-1.34556	4.21e-23
ENSG00000179564	LSMEM2	4.99257	1.75e-35
ENSG00000179598	PLD6	-1.44125	3.75e-14
ENSG00000179604	CDC42EP4	-1.31718	7.82e-58
ENSG00000179772	FOXS1	-2.57912	1.19e-18
ENSG00000179774	ATOH7	1.61893	0.00854231
ENSG00000179833	SERTAD2	-1.10364	2.42e-28
ENSG00000179841	AKAP5	1.21687	4.18e-10
ENSG00000179855	GIPC3	2.08404	1.54e-07
ENSG00000179859	RNF227	-1.0782	5.87e-08
ENSG00000179862	CITED4	-1.61209	3.37e-45
ENSG00000179886	TIGD5	-1.83424	1.97e-49
ENSG00000179921	GPBAR1	6.19267	7.4e-77
ENSG00000179922	ZNF784	-1.14069	9.41e-12
ENSG00000180035	ZNF48	-1.15177	3.8e-29
ENSG00000180044	C3orf80	-1.01394	5.18e-07
ENSG00000180066	C10orf91	-1.96096	1.3e-36
ENSG00000180071	ANKRD18A	-1.12771	2.83e-14
ENSG00000180139	ACTA2-AS1	1.92476	3.06e-06
ENSG00000180210	F2	1.23524	2.4e-14
ENSG00000180245	RRH	3.77388	9.57e-09
ENSG00000180318	ALX1	-1.52553	1.13e-17
ENSG00000180336	MEIOC	-1.02408	2.8e-10
ENSG00000180346	TIGD2	-2.22475	1.43e-40
ENSG00000180353	HCLS1	5.32724	2.91e-144
ENSG00000180357	ZNF609	-1.27174	8.89e-47
ENSG00000180423	HARBI1	-1.03576	8.02e-05
ENSG00000180447	GAS1	3.01586	1.63e-05
ENSG00000180481	GLIPR1L2	1.46808	0.00358269
ENSG00000180525	PRR26	-1.16338	4.16e-05
ENSG00000180530	NRIP1	-1.11789	1.72e-43
ENSG00000180537	RNF182	-1.55143	1.69e-05
ENSG00000180549	FUT7	2.58826	5.07e-06
ENSG00000180638	SLC47A2	3.74512	4.97e-24
ENSG00000180667	YOD1	-1.2206	4.88e-24
ENSG00000180739	S1PR5	-1.67532	3.35e-18
ENSG00000180758	GPR157	-1.51794	3.37e-34
ENSG00000180785	OR51E1	-1.75654	2.98e-08
ENSG00000180787	ZFP3	-1.13113	6.07e-09
ENSG00000180855	ZNF443	-1.36275	8.24e-07
ENSG00000180861	LINC01559	-1.53616	0.00236428
ENSG00000180867	PDIA3P1	1.05273	3.12e-14
ENSG00000180869	LINC01555	5.15996	4.58e-07
ENSG00000180884	ZNF792	-1.55021	1.37e-18
ENSG00000181004	BBS12	-1.50537	1.28e-15
ENSG00000181016	LSMEM1	2.19178	4.25e-37
ENSG00000181026	AEN	-1.18435	3.56e-46
ENSG00000181097	ENSG00000181097	1.06538	0.00505119
ENSG00000181104	F2R	1.03073	8.8e-40
ENSG00000181274	FRAT2	-1.68709	8.53e-37
ENSG00000181284	TMEM102	-1.40091	5.39e-23
ENSG00000181350	LRRC75A	-1.38	1.92e-06
ENSG00000181378	CFAP65	1.87762	0.000359366
ENSG00000181381	DDX60L	2.9594	3.02e-137
ENSG00000181418	DDN	5.88507	2.75e-274
ENSG00000181458	TMEM45A	1.13077	2.26e-10
ENSG00000181467	RAP2B	-1.80832	5.56e-65
ENSG00000181577	C6orf223	-1.53943	0.00210429
ENSG00000181754	AMIGO1	-1.04216	1.39e-09
ENSG00000181819	KCTD9P2	-1.14738	0.000343152
ENSG00000181873	IBA57	-1.08046	6.4e-14
ENSG00000181885	CLDN7	2.4119	3.3e-08
ENSG00000182022	CHST15	-1.13434	3.45e-22
ENSG00000182118	FAM89A	-1.34105	1.11e-24
ENSG00000182141	ZNF708	-1.04443	1.75e-05
ENSG00000182179	UBA7	3.2635	3.99e-41
ENSG00000182196	ARL6IP4	-2.13302	1.64e-05
ENSG00000182263	FIGN	-1.11509	3.67e-14
ENSG00000182308	DCAF4L1	5.05222	4.57e-26
ENSG00000182319	NA	-1.24149	2.39e-49
ENSG00000182326	C1S	1.76451	5.24e-34
ENSG00000182351	CRIP1P4	1.56652	0.0115692
ENSG00000182379	NXPH4	1.04728	1.59e-13
ENSG00000182393	IFNL1	10.3957	5.73e-66
ENSG00000182405	PGBD4	-2.06212	1.2e-22
ENSG00000182459	TEX19	1.06803	3.46e-05
ENSG00000182472	CAPN12	-1.6098	1.53e-24
ENSG00000182489	XKRX	-1.45703	1.38e-06
ENSG00000182511	FES	1.62584	3.4e-11
ENSG00000182580	EPHB3	-1.13308	2.8e-07
ENSG00000182585	EPGN	5.97222	9.24e-07
ENSG00000182648	LINC01006	1.45058	0.000417719
ENSG00000182676	PPP1R27	7.1505	1.08e-28
ENSG00000182700	IGIP	1.30451	8.71e-11
ENSG00000182742	HOXB4	2.12906	1.09e-26
ENSG00000182782	HCAR2	5.95712	5.28e-16
ENSG00000182791	CCDC87	-2.56409	8.77e-09
ENSG00000182810	DDX28	-1.62119	3.79e-41
ENSG00000182831	C16orf72	-1.06014	4.71e-30
ENSG00000182885	ADGRG3	3.32454	1.92e-17
ENSG00000182909	NA	-1.83957	4.55e-32
ENSG00000182963	GJC1	-1.19858	3.34e-19
ENSG00000182985	CADM1	1.13811	1.12e-46
ENSG00000183010	PYCR1	1.01727	4e-39
ENSG00000183032	SLC25A21	1.3131	1.28e-07
ENSG00000183060	LYSMD4	-1.1603	8.4e-18
ENSG00000183114	FAM43B	-1.48143	9.63e-09
ENSG00000183150	GPR19	1.01282	1.26e-05
ENSG00000183186	C2CD4C	-1.80464	9.35e-08
ENSG00000183248	PRR36	-1.56167	1.05e-12
ENSG00000183287	CCBE1	1.25671	4.38e-09
ENSG00000183291	SELENOF	1.12425	1.12e-36
ENSG00000183307	TMEM121B	2.38551	6.79e-08
ENSG00000183309	ZNF623	-1.00536	1.68e-25
ENSG00000183346	CABCOCO1	1.9275	3.53e-05
ENSG00000183354	KIAA2026	-1.2948	3.05e-25
ENSG00000183386	FHL3	-1.19507	5.83e-15
ENSG00000183423	LRIT3	5.42202	2.68e-47
ENSG00000183444	OR7E38P	1.11323	1.52e-13
ENSG00000183484	GPR132	1.97904	6e-27
ENSG00000183486	MX2	9.9173	1.71e-177
ENSG00000183508	TENT5C	1.0309	0.0127804
ENSG00000183655	KLHL25	-1.69857	1.03e-39
ENSG00000183657	NA	-1.86382	0.00934217
ENSG00000183665	TRMT12	-1.34792	5.44e-24
ENSG00000183709	IFNL2	11.1096	5.14e-93
ENSG00000183718	TRIM52	-1.22702	7.03e-29
ENSG00000183778	B3GALT5	-1.54412	3.26e-10
ENSG00000183779	ZNF703	-1.62954	1.88e-49
ENSG00000183864	TOB2	-1.0616	2.71e-31
ENSG00000183963	SMTN	-1.03133	1.09e-17
ENSG00000183979	NPB	-1.84172	0.0151207
ENSG00000184058	TBX1	-1.19044	5.85e-06
ENSG00000184156	KCNQ3	1.06703	0.01299
ENSG00000184260	HIST2H2AC	1.27594	1.49e-05
ENSG00000184270	HIST2H2AB	3.33484	1.66e-08
ENSG00000184361	SPATA32	2.50631	0.000109565
ENSG00000184371	CSF1	1.2478	4.54e-55
ENSG00000184454	NCMAP	-1.57087	7.96e-19
ENSG00000184492	FOXD4L1	2.76416	9.79e-37
ENSG00000184497	TMEM255B	2.0501	0.00168739
ENSG00000184502	GAST	5.79438	4.06e-09
ENSG00000184545	DUSP8	1.11376	1.08e-08
ENSG00000184557	SOCS3	1.52157	2.54e-13
ENSG00000184564	SLITRK6	-1.60787	1.32e-29
ENSG00000184575	XPOT	1.12632	3.37e-50
ENSG00000184584	TMEM173	1.2676	2.37e-09
ENSG00000184602	SNN	-1.41076	6.59e-28
ENSG00000184661	CDCA2	-1.18575	1.05e-33
ENSG00000184675	AMER1	-1.01796	9.5e-13
ENSG00000184697	CLDN6	2.88735	1.06e-06
ENSG00000184702	2020-09-05	-1.02901	1.09e-13
ENSG00000184716	SERINC4	3.78381	2.11e-20
ENSG00000184840	TMED9	1.20428	7.8e-14
ENSG00000184860	SDR42E1	-1.22763	1.5e-05
ENSG00000184886	NA	1.42804	2.78e-62
ENSG00000184898	RBM43	1.07154	3.37e-21
ENSG00000184979	USP18	3.52376	2.51e-121
ENSG00000184986	TMEM121	-1.36407	1.62e-07
ENSG00000185019	UBOX5	-1.07002	5.77e-15
ENSG00000185022	MAFF	-1.31485	1.59e-07
ENSG00000185024	BRF1	-1.14962	6.15e-34
ENSG00000185046	ANKS1B	-1.44522	0.0040423
ENSG00000185055	EFCAB10	1.36778	5.5e-05
ENSG00000185069	KRT76	6.52408	8.47e-13
ENSG00000185085	INTS5	-1.24305	7.81e-32
ENSG00000185112	FAM43A	-1.20969	2.23e-06
ENSG00000185201	IFITM2	1.31144	3.05e-38
ENSG00000185219	ZNF445	-1.12171	2.67e-25
ENSG00000185269	NOTUM	-1.18996	0.0105371
ENSG00000185338	SOCS1	2.57271	9.51e-14
ENSG00000185347	TEDC1	-1.06594	3.89e-19
ENSG00000185361	TNFAIP8L1	-2.14557	1.26e-65
ENSG00000185404	SP140L	1.98132	9.14e-29
ENSG00000185432	METTL7A	-1.32111	0.0100887
ENSG00000185437	SH3BGR	1.07061	0.000367421
ENSG00000185467	KPNA7	1.02546	0.0166772
ENSG00000185482	STAC3	1.30983	1.32e-11
ENSG00000185507	IRF7	5.18167	0
ENSG00000185527	PDE6G	3.42604	6.1e-37
ENSG00000185551	NR2F2	-1.06534	5.5e-33
ENSG00000185615	PDIA2	1.54723	6.71e-07
ENSG00000185621	LMLN	1.12566	9.21e-23
ENSG00000185633	NDUFA4L2	2.11744	1.26e-14
ENSG00000185640	KRT79	2.96893	8.19e-06
ENSG00000185664	PMEL	1.03731	6.83e-07
ENSG00000185670	ZBTB3	-1.71799	4.67e-13
ENSG00000185730	ZNF696	-1.53575	4.97e-25
ENSG00000185745	IFIT1	8.24273	0
ENSG00000185880	TRIM69	2.78642	1.29e-183
ENSG00000185885	IFITM1	4.64458	8.21e-39
ENSG00000185909	KLHDC8B	-1.3434	1.35e-22
ENSG00000185924	RTN4RL1	-1.10864	4.95e-08
ENSG00000185955	C7orf61	2.90013	6.1e-18
ENSG00000185989	RASA3	-1.00176	1.75e-20
ENSG00000186051	TAL2	3.5518	4.96e-06
ENSG00000186056	MATN1-AS1	-1.46027	2.9e-08
ENSG00000186174	BCL9L	-1.25045	2.78e-57
ENSG00000186197	EDARADD	-1.32203	2.17e-19
ENSG00000186198	SLC51B	1.09804	1.87e-11
ENSG00000186212	SOWAHB	-1.70759	0.00306528
ENSG00000186272	ZNF17	-1.19476	1.16e-08
ENSG00000186280	KDM4D	2.86889	1.86e-34
ENSG00000186297	GABRA5	1.0045	4.08e-37
ENSG00000186326	RGS9BP	-3.09245	1.3e-06
ENSG00000186352	ANKRD37	-1.29925	1.09e-05
ENSG00000186399	GOLGA8R	1.10194	0.0214622
ENSG00000186442	KRT3	4.21035	5.48e-09
ENSG00000186446	ZNF501	4.80925	3.45e-15
ENSG00000186448	ZNF197	-1.35957	8.02e-08
ENSG00000186517	ARHGAP30	6.11477	6.59e-41
ENSG00000186564	FOXD2	-2.08966	5.84e-09
ENSG00000186642	PDE2A	1.5276	3.92e-08
ENSG00000186666	BCDIN3D	-1.07905	1.04e-17
ENSG00000186704	DTX2P1	-1.36344	0.001415
ENSG00000186807	NA	1.33501	1.36e-10
[truncated: 1,376 more rows]

## Sheet: DE_12HPI
ensembl_gene_id	hgnc_symbol	log2FoldChange	pval
ENSG00000000003	TSPAN6	1.32014	2.28e-20
ENSG00000000419	DPM1	-1.17984	4.63e-29
ENSG00000000460	C1orf112	-1.36625	4.36e-21
ENSG00000000971	CFH	1.51208	4.71e-93
ENSG00000001036	FUCA2	1.44149	4.47e-36
ENSG00000001460	STPG1	-1.455	4.14e-13
ENSG00000001626	CFTR	1.2216	0.00370516
ENSG00000001631	KRIT1	-1.14189	7.61e-26
ENSG00000002016	RAD52	-1.63204	4.3e-25
ENSG00000002549	LAP3	3.67129	6.55e-153
ENSG00000002822	MAD1L1	-1.40166	3.92e-21
ENSG00000002919	SNX11	-1.44039	1.03e-32
ENSG00000003056	M6PR	1.00108	3.79e-24
ENSG00000003096	KLHL13	-1.86369	0.00045624
ENSG00000003137	CYP26B1	1.80702	9.3e-65
ENSG00000003400	CASP10	1.12612	1.73e-17
ENSG00000003509	NDUFAF7	-1.20383	5.61e-26
ENSG00000003989	SLC7A2	-1.03212	1.86e-17
ENSG00000004139	SARM1	-1.3043	1.45e-22
ENSG00000004468	CD38	3.70621	0
ENSG00000004487	KDM1A	-1.05935	5.94e-36
ENSG00000004660	CAMKK1	-1.59281	6.33e-25
ENSG00000004799	PDK4	1.42514	5.24e-51
ENSG00000004838	ZMYND10	5.90188	1.55e-73
ENSG00000004939	SLC4A1	5.4157	3.14e-06
ENSG00000004948	CALCR	4.67494	8.69e-10
ENSG00000004961	HCCS	1.77426	1.12e-54
ENSG00000004975	DVL2	-2.13937	1.34e-103
ENSG00000005073	HOXA11	2.18853	1.4e-10
ENSG00000005100	DHX33	1.69193	4.13e-108
ENSG00000005156	LIG3	-1.56945	7.57e-46
ENSG00000005175	RPAP3	-1.14296	2.3e-28
ENSG00000005194	CIAPIN1	-1.01947	1.41e-29
ENSG00000005243	COPZ2	1.33484	7.57e-18
ENSG00000005302	MSL3	1.00007	1.83e-28
ENSG00000005379	TSPOAP1	9.28069	6.41e-53
ENSG00000005471	ABCB4	-2.38808	0.0292055
ENSG00000005801	ZNF195	-1.47201	1.53e-32
ENSG00000005812	FBXL3	1.08009	2.92e-28
ENSG00000005844	ITGAL	-2.44891	9.63e-06
ENSG00000005882	PDK2	-1.58611	5.2e-37
ENSG00000005961	ITGA2B	2.38001	6.95e-50
ENSG00000006016	CRLF1	1.12408	0.00172784
ENSG00000006025	OSBPL7	-1.33623	8.11e-24
ENSG00000006042	TMEM98	1.24551	4.15e-19
ENSG00000006210	CX3CL1	2.79915	2.7e-34
ENSG00000006459	KDM7A	1.30254	1.17e-29
ENSG00000006606	CCL26	3.14991	1.15e-12
ENSG00000006607	FARP2	-1.41764	1.29e-44
ENSG00000006611	USH1C	-1.17119	2.89e-14
ENSG00000006695	COX10	-1.83287	9.23e-37
ENSG00000006704	GTF2IRD1	-1.70846	1.01e-36
ENSG00000006831	ADIPOR2	1.36579	4.9e-15
ENSG00000006837	CDKL3	2.32199	7.95e-15
ENSG00000007047	MARK4	-1.57034	2.11e-26
ENSG00000007062	PROM1	3.54095	3.79e-08
ENSG00000007312	CD79B	3.79446	5.42e-07
ENSG00000007314	SCN4A	2.19404	0.000164362
ENSG00000007376	RPUSD1	-1.07059	1.98e-21
ENSG00000007392	LUC7L	-1.36016	3.12e-43
ENSG00000007516	BAIAP3	2.47943	4.89e-37
ENSG00000007541	PIGQ	-1.21425	5.72e-35
ENSG00000007866	TEAD3	-1.59292	8.55e-19
ENSG00000007944	MYLIP	1.09362	1.81e-17
ENSG00000008056	SYN1	6.83482	4e-40
ENSG00000008128	CDK11A	1.22227	0.00106591
ENSG00000008256	CYTH3	-1.34792	3.8e-36
ENSG00000008283	CYB561	-1.14948	3.17e-31
ENSG00000008394	MGST1	1.89235	5.15e-123
ENSG00000008516	MMP25	3.02223	9.32e-09
ENSG00000008517	IL32	1.78009	1.59e-16
ENSG00000008735	MAPK8IP2	1.40576	1.12e-16
ENSG00000008853	RHOBTB2	-1.71348	3.03e-63
ENSG00000008952	SEC62	1.37815	3.4e-48
ENSG00000008988	RPS20	1.66908	5.21e-69
ENSG00000009413	REV3L	1.97789	2.43e-69
ENSG00000009724	MASP2	2.98248	3.49e-05
ENSG00000009950	MLXIPL	-2.11974	3.97e-28
ENSG00000010030	ETV7	6.40987	2.6e-34
ENSG00000010165	METTL13	-1.53851	2.65e-58
ENSG00000010244	ZNF207	-1.25225	1.03e-61
ENSG00000010295	IFFO1	2.30202	4.52e-16
ENSG00000010310	GIPR	-3.1075	1.31e-17
ENSG00000010327	STAB1	6.49604	1.08e-38
ENSG00000010361	FUZ	-1.53162	3.82e-23
ENSG00000010379	SLC6A13	3.96767	1.29e-17
ENSG00000010404	IDS	1.15364	2.9e-57
ENSG00000010438	PRSS3	1.16414	3.39e-08
ENSG00000010610	CD4	8.08441	6.92e-30
ENSG00000010671	BTK	5.80286	6.41e-07
ENSG00000010818	HIVEP2	1.45535	1.35e-44
ENSG00000011007	ELOA	1.48008	3.27e-65
ENSG00000011009	LYPLA2	-1.34615	5.57e-32
ENSG00000011021	CLCN6	-1.19494	6.29e-24
ENSG00000011114	BTBD7	1.04157	1.44e-32
ENSG00000011132	APBA3	-1.06854	1.27e-11
ENSG00000011143	MKS1	-1.6296	2.26e-25
ENSG00000011243	AKAP8L	1.85989	7.58e-124
ENSG00000011260	UTP18	-1.18959	1.9e-44
ENSG00000011275	RNF216	-1.29655	6.01e-46
ENSG00000011332	DPF1	-1.23715	0.00092062
ENSG00000011422	PLAUR	2.66268	1.41e-138
ENSG00000011478	QPCTL	-1.68773	1.44e-34
ENSG00000011485	PPP5C	-1.38577	2.17e-57
ENSG00000011523	CEP68	-2.78655	3.72e-99
ENSG00000011677	GABRA3	1.44338	0.000132121
ENSG00000012048	BRCA1	-1.54588	1.39e-58
ENSG00000012124	CD22	1.45096	0.00662733
ENSG00000012211	PRICKLE3	-1.06487	2.89e-15
ENSG00000012232	EXTL3	-1.074	5.42e-32
ENSG00000012817	KDM5D	-1.17577	5.11e-27
ENSG00000013016	EHD3	-1.40921	2.81e-23
ENSG00000013297	CLDN11	2.61344	5.56e-14
ENSG00000013392	RWDD2A	-2.59483	6.67e-29
ENSG00000013441	CLK1	1.67956	2.21e-91
ENSG00000013523	ANGEL1	-1.76413	7.81e-45
ENSG00000013561	RNF14	-1.61286	1.54e-49
ENSG00000013810	TACC3	-1.43462	1.04e-53
ENSG00000014123	UFL1	-1.09681	2.85e-19
ENSG00000014138	POLA2	-1.69754	1.63e-39
ENSG00000014216	CAPN1	-1.27028	2.26e-64
ENSG00000014919	COX15	-1.32379	6.28e-42
ENSG00000015285	WAS	2.47257	1.11e-11
ENSG00000015413	DPEP1	2.16989	1.05e-13
ENSG00000015520	NPC1L1	5.24029	4.5e-152
ENSG00000015532	XYLT2	-1.56884	2.34e-43
ENSG00000015676	NUDCD3	-1.39015	1.49e-56
ENSG00000016391	CHDH	-2.78475	1.29e-45
ENSG00000017373	NA	-2.14836	5.32e-21
ENSG00000017483	SLC38A5	2.81815	1.13e-07
ENSG00000018610	CXorf56	-1.20197	1.92e-22
ENSG00000018699	TTC27	-1.11194	1.17e-25
ENSG00000019144	PHLDB1	-2.4034	4.02e-49
ENSG00000019186	CYP24A1	-1.00986	1.48e-56
ENSG00000020129	NCDN	-1.10181	1.23e-18
ENSG00000020922	MRE11	-1.12143	1.34e-21
ENSG00000021488	SLC7A9	2.10149	1.64e-20
ENSG00000021762	OSBPL5	-1.57815	1.8e-25
ENSG00000021776	AQR	-1.24518	3.92e-46
ENSG00000022556	NLRP2	-1.8826	5.81e-90
ENSG00000022567	SLC45A4	-2.05455	1.56e-118
ENSG00000022976	ZNF839	-1.8885	5.64e-29
ENSG00000023191	RNH1	-1.08878	7.53e-35
ENSG00000023445	BIRC3	1.74302	5.28e-32
ENSG00000023516	AKAP11	-1.38442	3.1e-26
ENSG00000023697	DERA	-1.13783	1.24e-26
ENSG00000023892	DEF6	1.29169	0.0475504
ENSG00000023902	PLEKHO1	-1.13441	2.89e-08
ENSG00000023909	GCLM	-1.30516	8.33e-70
ENSG00000024422	EHD2	-2.25338	1.4e-126
ENSG00000025708	TYMP	3.36831	0
ENSG00000025796	SEC63	1.18942	5.13e-54
ENSG00000026036	RTEL1-TNFRSF6B	-2.49168	0.000853581
ENSG00000026103	FAS	2.08128	7.35e-72
ENSG00000026297	RNASET2	1.34094	2e-21
ENSG00000026652	AGPAT4	-1.34636	1.24e-12
ENSG00000026751	SLAMF7	2.5727	0.000568496
ENSG00000026950	BTN3A1	2.2365	8.97e-97
ENSG00000027697	IFNGR1	1.031	4.4e-35
ENSG00000027869	SH2D2A	-2.16803	0.00290824
ENSG00000028137	TNFRSF1B	3.28379	5.57e-11
ENSG00000028277	POU2F2	4.17121	6.06e-70
ENSG00000028310	BRD9	-1.7613	4.6e-40
ENSG00000029639	TFB1M	-1.96497	3.58e-18
ENSG00000031081	ARHGAP31	-1.95084	1.21e-07
ENSG00000031544	NA	-2.44535	1.41e-06
ENSG00000031691	CENPQ	-1.04681	1.29e-07
ENSG00000031823	RANBP3	-1.57769	1.06e-44
ENSG00000032389	EIPR1	-1.26627	8.91e-34
ENSG00000032742	IFT88	-1.12177	1.08e-15
ENSG00000033030	ZCCHC8	1.12319	1.86e-26
ENSG00000033050	ABCF2	-1.05888	7.84e-38
ENSG00000033327	GAB2	-2.44002	1.68e-40
ENSG00000033800	PIAS1	-1.05391	8.08e-24
ENSG00000034063	NA	-1.28221	3.57e-24
ENSG00000034152	MAP2K3	1.91707	1.19e-133
ENSG00000034510	TMSB10	1.58517	1.75e-102
ENSG00000034533	ASTE1	-2.14918	2.06e-14
ENSG00000034677	RNF19A	-1.60979	1.54e-31
ENSG00000035687	ADSS	-1.01708	7.68e-28
ENSG00000035862	TIMP2	1.16386	6.31e-15
ENSG00000037042	TUBG2	-1.37202	5.01e-27
ENSG00000037241	RPL26L1	1.72688	6.26e-71
ENSG00000037637	FBXO42	-1.0438	2.44e-15
ENSG00000037757	MRI1	-1.18338	5.62e-20
ENSG00000037897	METTL1	-1.53927	2.92e-24
ENSG00000037965	HOXC8	2.55722	6.32e-59
ENSG00000038002	AGA	1.16951	7.68e-16
ENSG00000038210	PI4K2B	1.07196	4.17e-07
ENSG00000039123	MTREX	-1.86398	1.89e-89
ENSG00000039139	DNAH5	-1.44349	1.48e-15
ENSG00000039523	RIPOR1	-1.45626	5.51e-41
ENSG00000039650	PNKP	-1.2565	2.58e-33
ENSG00000039987	BEST2	7.44173	1.02e-15
ENSG00000040275	SPDL1	1.33203	2.03e-59
ENSG00000040341	STAU2	-1.35125	4.82e-39
ENSG00000040487	PQLC2	-2.06703	6.73e-35
ENSG00000040531	CTNS	-2.24414	1.15e-56
ENSG00000040608	RTN4R	-1.86858	1.26e-14
ENSG00000040933	INPP4A	-1.03747	1.43e-21
ENSG00000042088	TDP1	-1.61365	2.31e-27
ENSG00000042317	SPATA7	-2.34793	4.68e-33
ENSG00000042493	CAPG	1.35246	1.86e-60
ENSG00000042832	TG	5.12844	9.87e-31
ENSG00000043143	JADE2	1.71002	1.62e-121
ENSG00000043355	ZIC2	1.95195	2.59e-50
ENSG00000043514	TRIT1	-1.569	1.82e-27
ENSG00000044090	CUL7	-1.43965	1.67e-37
ENSG00000044446	PHKA2	-1.17665	1.09e-31
ENSG00000044459	CNTLN	-1.17547	5.23e-10
ENSG00000044574	HSPA5	1.64163	3.42e-29
ENSG00000046647	GEMIN8	-2.18972	2.99e-31
ENSG00000047056	WDR37	1.32371	6.48e-33
ENSG00000047230	CTPS2	-1.37696	2.8e-34
ENSG00000047346	FAM214A	1.01904	2.84e-17
ENSG00000047410	TPR	-1.36429	4.9e-75
ENSG00000047578	KIAA0556	-1.31738	2.02e-37
ENSG00000047579	DTNBP1	-1.59575	1.05e-13
ENSG00000047597	XK	-1.34782	0.000997614
ENSG00000047634	SCML1	3.34358	1.76e-105
ENSG00000047662	FAM184B	8.07339	5.03e-47
ENSG00000048342	CC2D2A	-1.42683	1.24e-20
ENSG00000048471	SNX29	-1.65316	2.38e-19
ENSG00000048649	RSF1	1.4557	9.67e-69
ENSG00000048707	VPS13D	-1.06279	3.08e-24
ENSG00000049192	ADAMTS6	2.16177	1.43e-21
ENSG00000049239	H6PD	-1.0405	1.49e-33
ENSG00000049245	VAMP3	1.20084	1.04e-55
ENSG00000049249	TNFRSF9	1.80177	1.46e-05
ENSG00000049283	EPN3	4.14446	6.58e-08
ENSG00000049449	RCN1	1.85044	1.75e-59
ENSG00000049540	ELN	-3.03148	2.92e-05
ENSG00000049541	RFC2	-1.04881	2.87e-18
ENSG00000049618	ARID1B	-1.14354	4.77e-29
ENSG00000049656	CLPTM1L	1.45117	4.48e-58
ENSG00000049769	PPP1R3F	1.03349	1.7e-15
ENSG00000049860	HEXB	1.08687	1.51e-37
ENSG00000049883	PTCD2	-1.70158	1.24e-17
ENSG00000050130	JKAMP	1.47264	2.2e-51
ENSG00000050165	DKK3	1.0601	6.2e-28
ENSG00000050327	ARHGEF5	-1.2811	0.0130445
ENSG00000050344	NFE2L3	1.25411	9.54e-27
ENSG00000050628	PTGER3	9.21006	1.81e-28
ENSG00000050820	BCAR1	-1.49888	1.32e-60
ENSG00000051009	FAM160A2	-1.33115	1.82e-32
ENSG00000051180	RAD51	-1.5546	5.88e-14
ENSG00000051341	POLQ	-1.03235	1.82e-15
ENSG00000051382	PIK3CB	-1.44838	1.08e-37
ENSG00000051523	CYBA	1.41855	1.57e-27
ENSG00000052126	PLEKHA5	-1.17058	1.2e-23
ENSG00000052749	RRP12	-1.13064	5.54e-35
ENSG00000052850	ALX4	-1.52633	1.58e-05
ENSG00000053108	FSTL4	-1.08177	1.6e-12
ENSG00000053770	AP5M1	-1.295	2.51e-28
ENSG00000053900	ANAPC4	-1.65113	1.61e-29
ENSG00000053918	KCNQ1	1.01849	1.13e-05
ENSG00000054148	PHPT1	1.58936	4.97e-99
ENSG00000054219	LY75	4.66201	3.89e-11
ENSG00000054267	ARID4B	1.29048	2.12e-55
ENSG00000054356	PTPRN	1.80845	0.0096335
ENSG00000054611	TBC1D22A	-1.93574	5.54e-41
ENSG00000054938	CHRDL2	3.48286	3.68e-10
ENSG00000054965	FAM168A	-1.0801	1.4e-36
ENSG00000054967	RELT	-1.52895	3.23e-15
ENSG00000054983	GALC	1.23019	4.9e-19
ENSG00000055118	KCNH2	-1.58596	0.000151366
ENSG00000055332	EIF2AK2	1.54963	1.01e-97
ENSG00000056050	HPF1	-1.95135	1.27e-30
ENSG00000056736	IL17RB	-1.15486	0.000794712
ENSG00000056972	TRAF3IP2	-1.21432	1.01e-10
ENSG00000056998	GYG2	-2.17893	3.07e-57
ENSG00000057468	MSH4	5.77113	7.2e-32
ENSG00000057657	PRDM1	2.21389	3.66e-88
ENSG00000057935	MTA3	-1.07274	7.63e-29
ENSG00000058056	USP13	-2.23847	4.81e-61
ENSG00000058453	CROCC	-1.63422	3.9e-26
ENSG00000058600	POLR3E	-1.23666	2.58e-38
ENSG00000058866	DGKG	-1.12802	6.44e-11
ENSG00000059122	FLYWCH1	-1.18644	6.09e-32
ENSG00000059378	PARP12	3.38139	4.66e-186
ENSG00000059588	TARBP1	-1.15483	9.05e-32
ENSG00000059728	MXD1	4.7949	1.36e-242
ENSG00000059769	DNAJC25	2.53383	3.57e-39
ENSG00000059804	SLC2A3	1.46414	1.98e-57
ENSG00000060140	STYK1	2.84775	1.24e-12
ENSG00000060491	OGFR	1.61448	7.25e-92
ENSG00000060558	GNA15	4.60476	3.66e-05
ENSG00000060642	PIGV	-1.44515	3e-24
ENSG00000060982	BCAT1	1.82314	5.5e-72
ENSG00000061273	HDAC7	-1.62353	1.04e-79
ENSG00000061455	PRDM6	1.55467	0.000970064
ENSG00000061938	TNK2	-1.08753	2.6e-21
ENSG00000061987	MON2	-1.2217	1.98e-41
ENSG00000062282	DGAT2	-2.59604	7.4e-07
ENSG00000062370	ZNF112	-1.54559	8.62e-12
ENSG00000062524	LTK	1.86095	3.84e-06
ENSG00000062650	WAPL	1.3115	1.16e-56
ENSG00000063176	SPHK2	-1.38576	3.92e-23
ENSG00000063177	RPL18	1.52992	2.62e-116
ENSG00000063322	MED29	-1.44887	4.01e-73
ENSG00000063438	AHRR	2.61795	2.37e-53
ENSG00000063761	ADCK1	-1.68557	2.7e-19
ENSG00000064012	CASP8	1.06576	4.78e-38
ENSG00000064102	INTS13	-1.7173	1.63e-46
ENSG00000064115	TM7SF3	1.33176	2.78e-48
ENSG00000064205	WISP2	1.97997	1.94e-33
ENSG00000064225	ST3GAL6	-1.23122	0.00808879
ENSG00000064300	NGFR	2.38796	1.76e-07
ENSG00000064309	CDON	-1.21676	1.02e-12
ENSG00000064490	RFXANK	-1.10439	9.57e-17
ENSG00000064547	LPAR2	-1.12873	5.44e-05
ENSG00000064651	SLC12A2	-1.34748	5.25e-87
ENSG00000064655	EYA2	-2.27188	3.33e-17
ENSG00000064687	ABCA7	-1.16719	8.11e-27
ENSG00000064726	BTBD1	1.41026	3.86e-77
ENSG00000064763	FAR2	3.86463	0.00257879
ENSG00000064787	BCAS1	-1.47291	7.2e-22
ENSG00000064886	CHI3L2	3.76331	6.58e-06
ENSG00000064933	PMS1	-1.37227	1.29e-25
ENSG00000064989	CALCRL	3.66289	2.67e-38
ENSG00000064995	TAF11	-2.02306	6.31e-38
ENSG00000065029	ZNF76	-1.07909	2.5e-13
ENSG00000065328	MCM10	-1.4443	5.77e-32
ENSG00000065618	COL17A1	2.6404	2.2e-05
ENSG00000065621	GSTO2	2.0683	3.69e-15
ENSG00000065978	YBX1	1.25189	8.84e-33
ENSG00000065989	PDE4A	-1.95249	1.21e-19
ENSG00000066136	NFYC	-1.02141	8.01e-21
ENSG00000066279	ASPM	-1.8765	4.03e-103
ENSG00000066336	SPI1	6.32187	1.61e-18
ENSG00000066422	ZBTB11	1.40225	1.67e-59
ENSG00000066629	EML1	-1.32767	4.55e-37
ENSG00000066651	TRMT11	-1.18163	1.24e-14
ENSG00000066735	KIF26A	-2.38964	1.77e-24
ENSG00000066777	ARFGEF1	-1.36597	7.41e-51
ENSG00000066813	ACSM2B	6.58803	2.96e-32
ENSG00000066827	ZFAT	-1.54718	2.03e-15
ENSG00000067048	DDX3Y	1.74198	2.88e-116
ENSG00000067066	SP100	2.86573	2.67e-175
ENSG00000067082	KLF6	1.5457	3.46e-84
ENSG00000067167	TRAM1	1.55077	4.32e-79
ENSG00000067182	TNFRSF1A	-1.75828	2.78e-140
ENSG00000067601	PMS2P4	1.30763	5.03e-05
ENSG00000067606	PRKCZ	-2.0562	3.18e-36
ENSG00000067836	ROGDI	-1.01625	3.52e-11
ENSG00000068001	HYAL2	-1.31375	2.76e-22
ENSG00000068078	FGFR3	-1.07731	4.5e-13
ENSG00000068079	IFI35	3.43861	6.94e-107
ENSG00000068097	HEATR6	-1.08057	4.82e-21
ENSG00000068323	TFE3	-1.03149	1.59e-40
ENSG00000068354	TBC1D25	-1.68756	9.35e-32
ENSG00000068394	GPKOW	-1.11448	5.4e-23
ENSG00000068489	PRR11	-1.2204	2.19e-29
ENSG00000068654	POLR1A	-1.16533	1.34e-45
ENSG00000068697	LAPTM4A	1.88641	1.56e-58
ENSG00000068724	TTC7A	-1.10179	1.91e-35
ENSG00000068784	SRBD1	-1.22691	1.74e-17
ENSG00000068831	RASGRP2	5.89009	1.46e-174
ENSG00000068885	IFT80	-1.04359	3.18e-17
ENSG00000068976	PYGM	7.39297	0
ENSG00000069188	SDK2	-1.06953	2.3e-05
ENSG00000069482	GAL	1.78838	2.08e-12
ENSG00000069535	MAOB	1.08207	0.0435994
ENSG00000069712	NA	-1.00848	3.58e-05
ENSG00000069849	ATP1B3	1.29109	2.56e-69
ENSG00000070019	GUCY2C	7.08598	4.04e-54
ENSG00000070047	PHRF1	-1.56589	7.84e-60
ENSG00000070081	NUCB2	1.57632	2.45e-89
ENSG00000070182	SPTB	-1.30644	2.95e-10
ENSG00000070214	SLC44A1	1.08978	5.07e-47
ENSG00000070366	SMG6	-1.14736	8.18e-35
ENSG00000070413	DGCR2	-1.1439	1.91e-31
ENSG00000070444	MNT	-1.31665	2.09e-31
ENSG00000070476	ZXDC	-1.41382	1.61e-22
ENSG00000070495	JMJD6	2.55555	2.33e-118
ENSG00000070540	WIPI1	-1.445	1.91e-27
ENSG00000070669	ASNS	2.4126	4.43e-238
ENSG00000070718	AP3M2	-1.47777	1.77e-34
ENSG00000070759	TESK2	1.4928	4.84e-10
ENSG00000070761	CFAP20	1.82711	3.11e-95
ENSG00000070785	EIF2B3	-1.54881	9.37e-22
ENSG00000070808	CAMK2A	3.01701	0.000159564
ENSG00000070814	TCOF1	-1.21445	6.79e-49
ENSG00000070882	OSBPL3	-1.38423	1.29e-32
ENSG00000070886	EPHA8	4.48237	4.04e-06
ENSG00000070915	SLC12A3	7.50084	2.22e-08
ENSG00000070950	RAD18	-1.94775	7.82e-38
ENSG00000070961	ATP2B1	-1.70136	2.5e-98
ENSG00000071082	RPL31	1.52443	4.83e-81
ENSG00000071189	SNX13	-1.02338	6.22e-23
ENSG00000071205	ARHGAP10	-1.85108	6.28e-23
ENSG00000071242	RPS6KA2	2.51118	3.67e-08
ENSG00000071243	ING3	1.51583	1.03e-28
ENSG00000071246	VASH1	-1.22341	1.84e-19
ENSG00000071462	BUD23	1.2387	7.82e-62
ENSG00000071539	TRIP13	-1.52269	1.67e-39
ENSG00000071575	TRIB2	1.97488	0.00017798
ENSG00000071677	PRLH	8.69175	2.73e-22
ENSG00000071967	CYBRD1	1.26514	9.26e-22
ENSG00000072134	EPN2	-2.21113	3.51e-105
ENSG00000072182	ASIC4	2.71908	1.08e-12
ENSG00000072210	ALDH3A2	-1.38518	7.46e-89
ENSG00000072364	AFF4	1.24059	2.09e-40
ENSG00000072415	MPP5	1.06203	1.33e-36
ENSG00000072422	RHOBTB1	-2.01909	5.24e-93
ENSG00000072609	CHFR	-1.17141	2.55e-24
ENSG00000072818	ACAP1	2.39572	2.64e-06
ENSG00000072832	CRMP1	-1.92678	2.07e-09
ENSG00000072849	DERL2	1.59368	9.95e-101
ENSG00000072858	SIDT1	1.60828	9.28e-28
ENSG00000072864	NDE1	-1.44988	9.13e-37
ENSG00000072958	AP1M1	-1.2625	2.43e-37
ENSG00000073009	NA	-1.80671	5.63e-21
ENSG00000073050	XRCC1	-1.25906	1.43e-32
ENSG00000073282	TP63	-1.37275	4.52e-21
ENSG00000073584	SMARCE1	2.09676	1.84e-169
ENSG00000073614	KDM5A	-1.29473	3.52e-48
ENSG00000073711	PPP2R3A	-2.30889	2.82e-23
ENSG00000073712	FERMT2	1.74877	4.22e-101
ENSG00000073756	PTGS2	2.33056	2.31e-29
ENSG00000073861	TBX21	6.55543	6.48e-25
ENSG00000073910	FRY	-1.95364	0.00149103
ENSG00000074047	GLI2	-2.56174	3.89e-99
ENSG00000074266	EED	-1.1434	2.38e-18
ENSG00000074319	TSG101	-1.07918	1.24e-36
ENSG00000074356	NCBP3	-1.01653	5.92e-24
ENSG00000074527	NTN4	1.14618	7.21e-16
ENSG00000074590	NUAK1	1.82492	1.67e-107
ENSG00000074660	SCARF1	4.15949	6.22e-27
ENSG00000074695	LMAN1	1.08464	1.58e-50
ENSG00000074706	IPCEF1	5.17599	2.17e-12
ENSG00000074842	MYDGF	1.21731	3.65e-25
ENSG00000074855	ANO8	-1.10017	8.55e-12
ENSG00000074964	ARHGEF10L	-1.22067	7.52e-23
ENSG00000074966	TXK	2.55467	5.72e-07
ENSG00000075043	KCNQ2	2.56992	0.00153109
ENSG00000075142	SRI	-1.04417	6.81e-23
ENSG00000075240	GRAMD4	-1.47389	1.02e-28
ENSG00000075303	SLC25A40	-1.3405	6.95e-17
ENSG00000075340	ADD2	-1.34103	6.06e-49
ENSG00000075391	RASAL2	-1.39632	2.99e-26
ENSG00000075413	MARK3	-1.30114	3.04e-47
ENSG00000075618	FSCN1	-1.03552	1.46e-24
ENSG00000075651	PLD1	-2.07726	2.2e-77
ENSG00000075702	WDR62	-1.45852	1.52e-48
ENSG00000075711	DLG1	-1.25896	1.87e-30
ENSG00000075891	PAX2	3.57912	6.02e-20
ENSG00000075914	EXOSC7	-1.23307	3.59e-19
ENSG00000075975	MKRN2	-1.89228	5.44e-52
ENSG00000076003	MCM6	-1.27034	3.06e-53
ENSG00000076053	RBM7	1.15722	1.25e-16
ENSG00000076067	RBMS2	1.63817	2.36e-30
ENSG00000076201	PTPN23	-1.44781	6.48e-44
ENSG00000076351	SLC46A1	-1.66825	2.61e-67
ENSG00000076555	ACACB	-1.60864	9.35e-31
ENSG00000076650	GPATCH1	-1.19387	2.29e-21
ENSG00000076924	XAB2	-1.03899	1.26e-21
ENSG00000076928	ARHGEF1	-1.54356	6.06e-86
ENSG00000077044	DGKD	-1.30285	3.17e-71
ENSG00000077157	PPP1R12B	-1.34775	1.47e-23
ENSG00000077232	DNAJC10	1.49187	1.33e-71
ENSG00000077235	GTF3C1	-1.19021	2.16e-52
ENSG00000077264	PAK3	4.24874	1.5e-22
ENSG00000077327	SPAG6	6.71148	7.49e-33
ENSG00000077380	DYNC1I2	-1.04634	9.58e-33
ENSG00000077454	LRCH4	-1.26137	3.44e-19
ENSG00000077458	FAM76B	1.5591	5.56e-44
ENSG00000077514	POLD3	-1.67891	1.79e-39
ENSG00000078018	MAP2	2.51623	1.04e-64
ENSG00000078043	PIAS2	-1.16504	2.08e-13
ENSG00000078081	LAMP3	8.27078	0
ENSG00000078098	FAP	12.4518	0
ENSG00000078142	PIK3C3	-1.31433	2.21e-21
ENSG00000078237	TIGAR	-1.04923	9.8e-17
ENSG00000078246	TULP3	-1.13357	1.56e-23
ENSG00000078269	SYNJ2	-1.36692	2.72e-52
ENSG00000078319	PMS2P1	1.19479	4.88e-15
ENSG00000078399	HOXA9	3.58985	4.49e-27
ENSG00000078401	EDN1	2.13615	1.62e-98
ENSG00000078596	ITM2A	1.32305	0.000442831
ENSG00000078747	ITCH	-1.57635	3.42e-63
ENSG00000078804	TP53INP2	-1.69259	5.88e-19
ENSG00000078808	SDF4	1.41323	2.55e-56
ENSG00000079134	THOC1	-1.41845	3.67e-29
ENSG00000079150	FKBP7	1.52789	3.74e-41
ENSG00000079263	SP140	3.89911	3.41e-06
ENSG00000079308	TNS1	-1.58137	2.47e-32
ENSG00000079335	CDC14A	2.03641	2.1e-17
ENSG00000079385	CEACAM1	3.97601	0
ENSG00000079435	LIPE	-1.53368	8.88e-07
ENSG00000079459	FDFT1	-1.74805	1.65e-130
ENSG00000079482	OPHN1	-2.04757	2.46e-44
ENSG00000079689	SCGN	1.84078	0.000912571
ENSG00000079691	CARMIL1	-1.74966	2.41e-46
ENSG00000079805	DNM2	-1.51224	1.21e-75
ENSG00000079931	MOXD1	1.66008	8.38e-09
ENSG00000079950	STX7	-1.61861	1.05e-37
ENSG00000079999	KEAP1	-1.37047	1.94e-56
ENSG00000080031	PTPRH	1.63708	1.14e-23
ENSG00000080166	DCT	4.33074	0.000125283
ENSG00000080200	CRYBG3	-1.27517	5.36e-24
ENSG00000080546	SESN1	1.62779	7.26e-26
ENSG00000080561	MID2	-1.20968	8.33e-08
ENSG00000080573	COL5A3	2.44929	9.57e-15
ENSG00000080608	PUM3	-1.73708	5.08e-56
ENSG00000080819	CPOX	-1.14016	2.42e-25
ENSG00000080824	HSP90AA1	2.314	0
ENSG00000080839	RBL1	-1.66325	1.47e-40
ENSG00000080845	DLGAP4	-1.25955	1.88e-41
ENSG00000080947	CROCCP3	-1.28452	1.77e-06
ENSG00000081019	RSBN1	1.5754	1.07e-16
ENSG00000081026	MAGI3	-1.50529	1.07e-24
ENSG00000081041	CXCL2	4.92297	1.85e-133
ENSG00000081059	TCF7	-1.32886	2.78e-15
ENSG00000081087	OSTM1	1.04016	5.12e-32
ENSG00000081148	IMPG2	5.73748	4.15e-41
ENSG00000081320	STK17B	1.55696	1.26e-41
ENSG00000081479	LRP2	6.36767	8.42e-24
ENSG00000081692	JMJD4	-2.17656	1.96e-42
ENSG00000081803	CADPS2	2.52611	9.38e-05
ENSG00000082068	WDR70	-1.38085	4.57e-25
ENSG00000082126	MPP4	6.74458	2.46e-55
ENSG00000082146	STRADB	-1.16614	7.14e-22
ENSG00000082153	BZW1	1.34732	1.49e-64
ENSG00000082196	C1QTNF3	-2.99923	0.0234539
ENSG00000082258	CCNT2	1.88842	2.03e-21
ENSG00000082269	FAM135A	1.11552	1.16e-27
ENSG00000082438	COBLL1	-1.06695	2.87e-07
ENSG00000082512	TRAF5	-1.55309	4.62e-37
ENSG00000082516	GEMIN5	-1.06765	4.45e-25
ENSG00000082805	ERC1	-1.3888	7e-49
ENSG00000082898	XPO1	1.15171	3.51e-63
ENSG00000083168	KAT6A	1.23991	1.62e-51
ENSG00000083457	ITGAE	1.12018	1.97e-33
ENSG00000083635	NUFIP1	1.335	5.97e-25
ENSG00000083720	OXCT1	1.20994	1.69e-06
ENSG00000083750	RRAGB	-1.02388	2.92e-13
ENSG00000083799	CYLD	2.11622	1.47e-118
ENSG00000083807	SLC27A5	1.21851	1.83e-23
ENSG00000083812	ZNF324	-1.18207	1.56e-10
ENSG00000083838	ZNF446	-2.26824	1.58e-55
ENSG00000083844	ZNF264	1.84554	8.03e-34
ENSG00000083845	RPS5	1.68873	5.93e-122
ENSG00000083896	YTHDC1	2.02497	6.42e-152
ENSG00000084070	SMAP2	-1.28829	2.74e-14
ENSG00000084073	ZMPSTE24	1.33792	2.42e-51
ENSG00000084092	NOA1	-1.41606	6.66e-36
ENSG00000084110	HAL	3.09837	2.92e-26
ENSG00000084207	GSTP1	1.31405	3.3e-44
ENSG00000084234	APLP2	1.12352	3.14e-27
ENSG00000084636	COL16A1	1.23728	1.57e-09
ENSG00000084710	EFR3B	-1.48179	3.53e-14
ENSG00000084731	KIF3C	-1.51572	1.13e-76
ENSG00000084774	CAD	-1.05865	3.06e-43
ENSG00000085433	WDR47	1.97003	3.84e-72
ENSG00000085465	OVGP1	1.09096	4.04e-11
ENSG00000085662	AKR1B1	1.25594	3.51e-80
ENSG00000085721	RRN3	1.88484	1.54e-132
ENSG00000085871	MGST2	1.19009	4.37e-45
ENSG00000085999	RAD54L	-1.95553	3.5e-21
ENSG00000086015	MAST2	-1.42975	4.2e-51
ENSG00000086061	DNAJA1	3.29822	0
ENSG00000086062	B4GALT1	1.49096	5.1e-28
ENSG00000086065	CHMP5	2.01943	2.27e-163
ENSG00000086159	AQP6	-2.35307	0.00437742
ENSG00000086189	DIMT1	-1.7574	3.87e-41
ENSG00000086200	IPO11	-1.17433	2.12e-21
ENSG00000086544	ITPKC	-1.15203	2.38e-25
ENSG00000086548	CEACAM6	1.78893	2.97e-47
ENSG00000086598	TMED2	2.04512	5e-38
ENSG00000086619	ERO1B	1.02895	5.51e-29
ENSG00000086730	LAT2	3.01289	2.52e-48
ENSG00000086848	ALG9	-1.06766	2.07e-06
ENSG00000086967	MYBPC2	3.87419	0.00426921
ENSG00000087008	ACOX3	-1.59446	1.05e-14
ENSG00000087074	PPP1R15A	1.27698	2.73e-19
ENSG00000087085	ACHE	2.69194	1.15e-07
ENSG00000087086	FTL	1.57136	3.7e-27
ENSG00000087087	SRRT	1.58987	1.27e-105
ENSG00000087157	PGS1	-1.52038	2.1e-42
ENSG00000087206	UIMC1	-1.48075	2.06e-44
ENSG00000087237	CETP	9.90115	1.23e-36
ENSG00000087245	MMP2	1.17715	4.36e-09
ENSG00000087266	SH3BP2	-1.41013	1.61e-18
ENSG00000087269	NOP14	1.14203	4.56e-12
ENSG00000087460	GNAS	1.72642	2.66e-143
ENSG00000087494	PTHLH	2.07101	4.68e-110
ENSG00000087586	AURKA	1.28234	9.76e-67
ENSG00000087589	CASS4	6.49907	6.02e-36
ENSG00000087903	RFX2	-1.65803	6.57e-16
ENSG00000088053	GP6	1.78956	0.0265242
ENSG00000088179	PTPN4	-1.14223	6.33e-19
ENSG00000088280	ASAP3	-1.59901	1.08e-18
ENSG00000088305	DNMT3B	-1.51711	2.52e-14
ENSG00000088325	TPX2	-1.93396	5.57e-123
ENSG00000088367	EPB41L1	-1.11624	1.84e-42
ENSG00000088448	ANKRD10	1.8198	1.39e-127
ENSG00000088543	C3orf18	-1.50721	2.5e-12
ENSG00000088682	COQ9	-1.92733	4.69e-69
ENSG00000088808	PPP1R13B	-1.79688	4.3e-25
ENSG00000088832	FKBP1A	1.73594	5.26e-137
ENSG00000088888	MAVS	-1.66405	1.23e-57
ENSG00000088926	F11	4.47827	9.93e-06
ENSG00000088970	KIZ	-1.28338	1.19e-17
ENSG00000088986	DYNLL1	1.25847	6.99e-72
ENSG00000089009	RPL6	1.29007	1.18e-45
ENSG00000089050	RBBP9	-1.01474	2.27e-20
ENSG00000089060	SLC8B1	-1.03538	2.58e-12
ENSG00000089063	TMEM230	1.00785	6.28e-46
ENSG00000089094	KDM2B	-1.21733	1.63e-26
ENSG00000089123	TASP1	-1.24174	6.77e-13
ENSG00000089127	OAS1	4.44494	1.09e-227
ENSG00000089157	RPLP0	1.49258	4.91e-36
ENSG00000089163	SIRT4	-1.11917	0.027086
ENSG00000089177	KIF16B	-1.57886	4.5e-44
ENSG00000089248	ERP29	1.36151	2.65e-53
ENSG00000089327	FXYD5	1.61065	7.73e-92
ENSG00000089486	CDIP1	-1.28715	1.14e-08
ENSG00000089558	KCNH4	1.96509	3.22e-06
ENSG00000089639	GMIP	-1.16955	7.92e-09
ENSG00000089692	LAG3	5.39892	1.54e-144
ENSG00000089723	OTUB2	-2.95432	1.09e-12
ENSG00000089775	ZBTB25	-1.06365	5.13e-12
ENSG00000089876	DHX32	-1.12944	2.43e-32
ENSG00000089902	RCOR1	-1.14419	2.04e-27
ENSG00000089916	GPATCH2L	-1.53875	1.86e-37
ENSG00000090054	SPTLC1	1.1432	1.45e-15
ENSG00000090266	NDUFB2	1.64181	2.74e-104
ENSG00000090339	ICAM1	4.45725	6.96e-191
ENSG00000090382	LYZ	3.23279	2.91e-09
ENSG00000090470	PDCD7	-1.31157	9.45e-33
ENSG00000090512	FETUB	4.99658	1.01e-05
ENSG00000090520	DNAJB11	1.68248	1.31e-31
ENSG00000090565	RAB11FIP3	-1.11437	1.56e-30
ENSG00000090661	CERS4	-1.97893	2.56e-23
ENSG00000090889	KIF4A	-1.54016	1.11e-56
ENSG00000090905	TNRC6A	1.01813	1.84e-39
ENSG00000090924	PLEKHG2	-1.58458	4.33e-80
ENSG00000090971	NAT14	-1.00821	7.48e-23
ENSG00000090989	EXOC1	-1.33313	2.86e-29
ENSG00000091128	LAMB4	2.19248	2.72e-05
ENSG00000091137	SLC26A4	4.05705	8.31e-43
ENSG00000091140	DLD	-1.218	9.97e-48
ENSG00000091157	WDR7	-1.5357	1.44e-18
ENSG00000091262	ABCC6	-1.30728	3.67e-07
ENSG00000091490	SEL1L3	1.0338	3.48e-22
ENSG00000091536	MYO15A	3.0246	2.16e-29
ENSG00000091879	ANGPT2	4.78925	8.79e-05
ENSG00000091947	TMEM101	-1.76944	1.86e-60
ENSG00000092010	PSME1	1.90692	5.9e-60
ENSG00000092140	G2E3	1.0066	1.79e-16
ENSG00000092200	RPGRIP1	-1.78267	0.00307678
ENSG00000092208	GEMIN2	-1.19398	1.48e-13
ENSG00000092295	TGM1	1.81377	1.41e-05
ENSG00000092330	TINF2	-1.24048	1.95e-32
ENSG00000092445	TYRO3	-1.38812	1.25e-24
ENSG00000092470	WDR76	-1.63907	1.04e-27
ENSG00000092621	PHGDH	1.54623	1.14e-93
ENSG00000092758	COL9A3	6.58933	1.47e-256
ENSG00000092841	MYL6	1.09745	1.87e-58
ENSG00000092847	AGO1	-1.08571	2.03e-20
ENSG00000092850	TEKT2	3.32947	0.00720177
ENSG00000092853	CLSPN	-1.32985	5.91e-16
ENSG00000092871	RFFL	-1.30499	2.62e-33
ENSG00000093000	NUP50	1.30183	3.38e-55
ENSG00000093010	COMT	1.13121	6.39e-12
ENSG00000094804	CDC6	-1.81606	2.79e-80
ENSG00000094841	UPRT	-1.75651	2.83e-20
ENSG00000094880	CDC23	-1.14288	3.93e-32
ENSG00000094975	SUCO	1.68507	1.75e-25
ENSG00000095002	MSH2	-2.18416	2.95e-110
ENSG00000095015	MAP3K1	2.16713	4.7e-74
ENSG00000095066	HOOK2	-1.27478	1.37e-16
ENSG00000095203	EPB41L4B	-1.25187	3.55e-23
ENSG00000095209	TMEM38B	1.8275	8.01e-76
ENSG00000095303	PTGS1	1.9945	1.21e-08
ENSG00000095319	NUP188	-1.15226	1.26e-37
ENSG00000095383	TBC1D2	-2.93875	1.51e-18
ENSG00000095485	CWF19L1	1.30435	2.23e-13
ENSG00000095574	IKZF5	2.8431	5.34e-208
ENSG00000095587	TLL2	6.63779	3.63e-209
ENSG00000095596	CYP26A1	3.79882	1.06e-25
ENSG00000095637	SORBS1	2.12863	1.02e-19
ENSG00000095713	CRTAC1	1.70089	0.0107523
ENSG00000095794	CREM	2.30813	9.46e-34
ENSG00000095932	SMIM24	2.25298	0.000598286
ENSG00000096070	BRPF3	-1.51253	1.47e-36
ENSG00000096080	MRPS18A	-1.09529	1.44e-19
ENSG00000096088	PGC	6.36033	5.53e-41
ENSG00000096092	TMEM14A	1.50165	1.66e-53
ENSG00000096093	EFHC1	-1.61946	1.51e-34
ENSG00000096384	HSP90AB1	2.68481	0
ENSG00000096654	ZNF184	-1.28777	9.26e-08
ENSG00000096696	DSP	1.20469	7.99e-63
ENSG00000096746	HNRNPH3	2.91256	0
ENSG00000096872	IFT74	-1.75847	2.29e-34
ENSG00000096968	JAK2	1.25415	1.25e-18
ENSG00000097007	ABL1	-1.24283	2.67e-58
ENSG00000097033	SH3GLB1	1.27233	1.42e-42
ENSG00000097046	CDC7	-1.5949	8.34e-14
ENSG00000099250	NRP1	1.16997	4.65e-65
ENSG00000099251	HSD17B7P2	-1.37889	6.91e-10
ENSG00000099260	PALMD	-1.65327	0.00287267
ENSG00000099284	H2AFY2	-1.61713	8.04e-45
ENSG00000099308	MAST3	-1.72584	1.09e-19
ENSG00000099330	OCEL1	-1.75232	2.07e-24
ENSG00000099331	MYO9B	-1.19278	1.84e-38
ENSG00000099338	CATSPERG	1.49642	1.12e-10
ENSG00000099364	FBXL19	-1.08786	5.33e-20
ENSG00000099377	HSD3B7	1.0995	3.16e-27
ENSG00000099617	EFNA2	3.65058	3.1e-117
ENSG00000099622	CIRBP	-1.44163	7.19e-51
ENSG00000099625	CBARP	-2.43681	7.12e-08
ENSG00000099725	PRKY	1.04561	3.08e-14
ENSG00000099783	HNRNPM	1.04631	1.9e-51
ENSG00000099795	NDUFB7	1.42146	5.69e-64
ENSG00000099797	TECR	1.22746	2.06e-44
ENSG00000099804	CDC34	-1.58097	1.26e-59
ENSG00000099821	POLRMT	-1.43574	3.67e-44
ENSG00000099834	CDHR5	3.47912	8.84e-08
ENSG00000099849	RASSF7	-1.80734	3.49e-67
ENSG00000099860	GADD45B	1.93295	7.61e-55
ENSG00000099889	ARVCF	-3.23232	4.33e-21
ENSG00000099899	TRMT2A	-2.28947	5.1e-52
ENSG00000099901	RANBP1	1.02378	9.68e-23
ENSG00000099910	KLHL22	-1.50411	2.25e-24
ENSG00000099942	CRKL	1.52435	6.3e-85
ENSG00000099949	LZTR1	-1.09455	1.1e-25
ENSG00000099956	SMARCB1	-1.22677	4.55e-32
ENSG00000099977	DDT	1.13133	2.36e-28
ENSG00000099985	OSM	8.5503	4.53e-67
ENSG00000099991	CABIN1	-1.20341	1.08e-35
ENSG00000099994	SUSD2	1.21582	1.81e-23
ENSG00000099999	RNF215	-1.03771	7.12e-17
ENSG00000100003	SEC14L2	-1.45594	1.12e-13
ENSG00000100014	SPECC1L	-1.68986	3.64e-37
ENSG00000100027	YPEL1	-1.61406	1.17e-07
ENSG00000100030	MAPK1	-1.26982	2.02e-52
ENSG00000100033	PRODH	-2.35105	2.58e-29
ENSG00000100034	PPM1F	-1.1713	3.89e-27
ENSG00000100036	SLC35E4	-1.60004	4.65e-12
ENSG00000100038	TOP3B	-1.49376	1.62e-25
ENSG00000100056	ESS2	-1.39934	1.71e-19
ENSG00000100065	CARD10	-2.11454	1.21e-75
ENSG00000100068	LRP5L	-1.14528	1.14e-06
ENSG00000100075	SLC25A1	-1.0794	8.37e-16
ENSG00000100092	SH3BP1	1.90648	2.82e-37
ENSG00000100097	LGALS1	1.57735	2.84e-112
ENSG00000100099	HPS4	-1.39684	9.64e-31
ENSG00000100100	PIK3IP1	-1.62332	1.6e-06
ENSG00000100104	SRRD	-1.23252	2.52e-17
ENSG00000100124	ANKRD54	-1.64592	4.85e-32
ENSG00000100138	SNU13	1.11396	4.79e-45
ENSG00000100139	MICALL1	-1.19859	3.22e-22
ENSG00000100150	DEPDC5	-1.55675	1.1e-14
ENSG00000100151	PICK1	-1.99169	1.15e-30
ENSG00000100154	TTC28	-1.17487	6.28e-23
ENSG00000100167	2019-09-03	-1.74028	7.17e-10
ENSG00000100170	SLC5A1	5.36491	3.62e-29
ENSG00000100211	CBY1	-1.54714	2.68e-21
ENSG00000100226	GTPBP1	1.08998	1.01e-22
ENSG00000100228	RAB36	-2.56125	2.92e-33
ENSG00000100239	PPP6R2	-1.00097	6.46e-22
ENSG00000100242	SUN2	-1.2809	4.88e-47
ENSG00000100253	MIOX	1.7002	0.0131774
ENSG00000100266	PACSIN2	-1.2911	7.59e-55
ENSG00000100276	RASL10A	3.04038	0.00029358
ENSG00000100284	TOM1	-2.13216	2.54e-50
ENSG00000100285	NEFH	4.17904	5.13e-06
ENSG00000100294	MCAT	-1.75815	5.22e-24
ENSG00000100297	MCM5	-1.41993	2.33e-26
ENSG00000100298	APOBEC3H	4.55473	6.89e-05
ENSG00000100300	TSPO	1.17784	7.72e-52
ENSG00000100304	TTLL12	-1.70404	1.91e-41
ENSG00000100307	CBX7	-2.35816	5.03e-24
ENSG00000100316	RPL3	1.31727	3.3e-40
ENSG00000100324	TAB1	-1.71256	5.56e-41
ENSG00000100330	MTMR3	-1.69309	1.03e-45
ENSG00000100342	APOL1	5.17716	0
ENSG00000100344	PNPLA3	-2.71183	4.77e-13
ENSG00000100345	MYH9	-1.38757	4.64e-90
ENSG00000100346	CACNA1I	3.12719	3.22e-21
ENSG00000100347	SAMM50	-1.12508	1.06e-25
ENSG00000100372	SLC25A17	1.1035	4.26e-23
ENSG00000100376	FAM118A	-1.21996	4.12e-17
ENSG00000100385	IL2RB	3.96323	2.46e-08
ENSG00000100387	RBX1	1.56633	4.58e-33
ENSG00000100413	POLR3H	-1.93324	1.47e-62
ENSG00000100417	PMM1	-1.0214	3.71e-22
ENSG00000100425	BRD1	1.81057	5.63e-99
ENSG00000100426	ZBED4	-1.99984	6.02e-63
ENSG00000100479	POLE2	-1.57762	4.61e-17
ENSG00000100485	SOS2	-1.28443	5.49e-32
ENSG00000100505	TRIM9	-1.31979	2.21e-22
ENSG00000100523	DDHD1	-1.44542	1.07e-24
ENSG00000100528	CNIH1	1.40096	6.12e-69
ENSG00000100557	CCDC198	-1.06923	2.96e-13
ENSG00000100567	PSMA3	1.36495	3.98e-76
ENSG00000100583	SAMD15	-2.95427	4.9e-11
ENSG00000100591	AHSA1	2.8425	0
ENSG00000100600	LGMN	1.38467	7.16e-64
ENSG00000100625	SIX4	2.99615	7.95e-125
ENSG00000100628	ASB2	2.64814	0.000772942
ENSG00000100629	CEP128	-2.03801	7.97e-20
ENSG00000100632	ERH	1.27981	3.44e-68
ENSG00000100650	SRSF5	-1.48828	2.3e-87
ENSG00000100697	DICER1	1.26248	3.52e-26
ENSG00000100711	ZFYVE21	-1.46789	5.08e-31
ENSG00000100722	ZC3H14	-1.62532	1.03e-75
ENSG00000100726	TELO2	-1.44615	7.4e-39
ENSG00000100739	BDKRB1	-1.44216	3.57e-07
ENSG00000100767	PAPLN	-1.31348	2.85e-21
ENSG00000100796	PPP4R3A	2.33889	6.22e-222
ENSG00000100811	YY1	2.12053	5.17e-192
ENSG00000100823	APEX1	-1.05591	2.08e-49
ENSG00000100867	DHRS2	1.25696	7.71e-05
ENSG00000100888	CHD8	1.44459	4.52e-85
ENSG00000100889	PCK2	1.60611	1.03e-66
ENSG00000100902	PSMA6	1.0105	5.95e-16
ENSG00000100906	NFKBIA	2.01715	2.05e-169
ENSG00000100911	PSME2	2.34606	9.59e-186
ENSG00000100916	BRMS1L	-1.2459	6.3e-16
ENSG00000100918	REC8	3.10827	8.85e-58
ENSG00000100982	PCIF1	-1.5681	6.89e-42
ENSG00000100987	VSX1	-1.08977	0.0180237
ENSG00000100991	TRPC4AP	-1.64383	6.37e-87
ENSG00000100994	PYGB	-1.23635	7.03e-72
ENSG00000101049	SGK2	-1.06	3.06e-07
ENSG00000101076	HNF4A	-1.98946	6.85e-90
ENSG00000101104	PABPC1L	-1.49442	1.82e-37
ENSG00000101109	STK4	-1.90799	1.04e-75
ENSG00000101115	SALL4	-1.36566	4.51e-09
ENSG00000101138	CSTF1	-1.28924	1.47e-30
ENSG00000101152	DNAJC5	-1.74434	1.03e-82
ENSG00000101160	CTSZ	1.53239	9.03e-19
ENSG00000101161	PRPF6	-1.32812	2.61e-53
ENSG00000101182	PSMA7	1.17859	5.15e-65
ENSG00000101187	SLCO4A1	-1.09281	2.67e-08
ENSG00000101191	DIDO1	1.35024	4.56e-31
ENSG00000101194	SLC17A9	8.13871	4.68e-39
ENSG00000101198	NKAIN4	1.07053	2.03e-12
ENSG00000101199	ARFGAP1	-1.83154	6.05e-102
ENSG00000101203	COL20A1	2.0963	1.2e-13
ENSG00000101216	GMEB2	-1.55632	2.8e-27
ENSG00000101222	SPEF1	5.08274	1.3e-72
ENSG00000101224	CDC25B	-1.55425	1.52e-109
ENSG00000101230	ISM1	1.48267	0.0106734
ENSG00000101246	ARFRP1	-1.81741	2.32e-32
ENSG00000101276	SLC52A3	-1.39888	0.00488019
ENSG00000101298	SNPH	-1.10744	2.62e-15
ENSG00000101306	MYLK2	1.22237	0.0232384
ENSG00000101311	FERMT1	-1.21294	3.48e-20
ENSG00000101333	PLCB4	-1.17641	9.34e-29
ENSG00000101335	MYL9	1.40514	4.27e-05
ENSG00000101347	SAMHD1	3.88332	4.14e-239
ENSG00000101350	KIF3B	-1.22026	5.71e-48
ENSG00000101353	MROH8	1.22441	4.88e-06
ENSG00000101384	JAG1	1.47334	8.18e-33
ENSG00000101391	CDK5RAP1	-1.25794	6.92e-28
ENSG00000101405	OXT	8.67073	1.94e-91
ENSG00000101407	TTI1	-1.43234	9.67e-38
ENSG00000101417	PXMP4	-2.49953	1.44e-19
ENSG00000101439	CST3	2.0874	1.93e-33
ENSG00000101442	ACTR5	-1.2334	1.96e-15
ENSG00000101445	PPP1R16B	-2.41824	1.85e-06
ENSG00000101463	SYNDIG1	-1.55319	0.00071215
ENSG00000101493	ZNF516	-1.46545	1.08e-16
ENSG00000101544	ADNP2	-1.6935	2.44e-52
ENSG00000101577	LPIN2	-1.61707	2.52e-61
ENSG00000101596	SMCHD1	1.39591	8.87e-67
ENSG00000101605	MYOM1	1.03197	0.00264188
ENSG00000101608	MYL12A	1.6275	5.34e-117
ENSG00000101639	CEP192	-1.56601	3.43e-36
ENSG00000101665	SMAD7	1.24	2.21e-31
ENSG00000101745	ANKRD12	1.85289	2.45e-68
ENSG00000101751	POLI	-1.15394	5.09e-18
ENSG00000101782	RIOK3	3.18294	3.66e-151
ENSG00000101843	PSMD10	1.27314	3.54e-57
ENSG00000101846	STS	2.23991	2.71e-103
ENSG00000101882	NKAP	-1.11742	2.06e-21
ENSG00000101888	NXT2	2.69066	1.41e-176
ENSG00000101928	MOSPD1	-1.36141	1.71e-17
ENSG00000101945	SUV39H1	-1.62869	2.99e-34
ENSG00000101977	MCF2	3.74734	7.24e-06
ENSG00000101997	CCDC22	-1.13122	2.04e-16
ENSG00000102001	CACNA1F	5.33544	1.59e-06
ENSG00000102003	SYP	1.61617	1.34e-20
ENSG00000102007	PLP2	1.2185	4.89e-68
ENSG00000102032	RENBP	4.62762	9.56e-18
ENSG00000102034	ELF4	-1.13026	8.34e-26
ENSG00000102038	SMARCA1	-1.15254	1.08e-52
ENSG00000102057	KCND1	1.5316	3.39e-36
ENSG00000102081	FMR1	1.71984	7.86e-98
ENSG00000102103	PQBP1	-1.16078	1.91e-35
ENSG00000102109	PCSK1N	1.74407	2.09e-11
ENSG00000102178	UBL4A	1.29776	9.08e-63
ENSG00000102218	RP2	2.38884	8.45e-149
ENSG00000102265	TIMP1	2.0215	7.41e-59
ENSG00000102287	GABRE	2.3021	6.42e-36
ENSG00000102302	FGD1	-1.79921	6.42e-35
ENSG00000102317	RBM3	1.71075	1.45e-119
ENSG00000102362	SYTL4	-1.5515	2.55e-14
ENSG00000102384	CENPI	-2.52088	6.92e-63
ENSG00000102387	TAF7L	5.67919	7.78e-19
ENSG00000102390	PBDC1	-1.95632	2.48e-39
ENSG00000102409	BEX4	1.04994	0.0104785
ENSG00000102452	NALCN	1.19144	2.99e-12
ENSG00000102524	TNFSF13B	6.18264	9.57e-25
ENSG00000102531	FNDC3A	1.13098	1.84e-47
ENSG00000102547	CAB39L	-1.25224	4.93e-07
ENSG00000102554	KLF5	1.32953	2.29e-72
ENSG00000102606	ARHGEF7	-1.31407	4.4e-34
ENSG00000102738	MRPS31	-1.11899	1.75e-12
ENSG00000102743	SLC25A15	-1.41182	7.28e-11
ENSG00000102760	RGCC	-1.01246	0.0200436
ENSG00000102763	VWA8	-1.08857	1.04e-18
ENSG00000102781	KATNAL1	-1.226	1.39e-16
ENSG00000102805	CLN5	1.12525	4.72e-29
ENSG00000102854	MSLN	1.61874	4.21e-05
ENSG00000102870	ZNF629	-1.31685	1.19e-35
ENSG00000102901	CENPT	-1.44846	2.2e-41
ENSG00000102904	TSNAXIP1	-1.53054	0.000507317
ENSG00000102910	LONP2	-1.26313	2.1e-50
ENSG00000102934	PLLP	-2.30553	8.05e-10
ENSG00000102977	ACD	-1.08229	3.57e-16
ENSG00000102981	PARD6A	-1.00704	9.17e-05
ENSG00000102984	ZNF821	1.96894	2.12e-46
ENSG00000103018	CYB5B	-1.35888	3.02e-76
ENSG00000103021	CCDC113	-1.40026	5.54e-12
ENSG00000103034	NDRG4	-1.94887	6.06e-55
ENSG00000103037	SETD6	-2.20331	1.17e-41
ENSG00000103042	SLC38A7	-1.1714	1.48e-23
ENSG00000103047	TANGO6	-1.64574	6.16e-35
ENSG00000103051	COG4	-1.34217	1.02e-49
ENSG00000103056	SMPD3	1.96633	0.015407
ENSG00000103091	WDR59	-1.22619	2.49e-39
ENSG00000103111	MON1B	-1.00388	7.47e-32
ENSG00000103145	HCFC1R1	1.14465	2.31e-40
ENSG00000103150	MLYCD	-1.82176	2.65e-20
ENSG00000103168	TAF1C	-1.20611	2.85e-32
ENSG00000103187	COTL1	1.23017	8.03e-58
ENSG00000103196	CRISPLD2	6.2855	0
ENSG00000103199	ZNF500	-1.21977	7.94e-16
ENSG00000103202	NME4	1.37567	2.09e-84
ENSG00000103245	NARFL	-1.74198	1.54e-41
ENSG00000103248	MTHFSD	-1.16055	1.36e-13
ENSG00000103260	METRN	1.13626	4.84e-24
ENSG00000103269	RHBDL1	1.63285	1.15e-16
ENSG00000103313	MEFV	5.04613	1.44e-06
ENSG00000103319	EEF2K	-1.54858	1.97e-48
ENSG00000103351	CLUAP1	-1.8492	5.7e-23
ENSG00000103363	ELOB	2.03977	7.22e-175
ENSG00000103365	GGA2	-1.4106	2.63e-56
ENSG00000103375	AQP8	5.43961	1.3e-08
ENSG00000103381	CPPED1	-1.08097	1.58e-30
ENSG00000103415	HMOX2	-1.89206	1.96e-49
ENSG00000103423	DNAJA3	-1.33836	1.48e-55
ENSG00000103460	TOX3	-1.72977	8e-17
ENSG00000103494	RPGRIP1L	-1.36454	5.55e-23
ENSG00000103496	STX4	-1.06571	2.79e-24
ENSG00000103507	BCKDK	-1.03286	4.35e-18
ENSG00000103510	KAT8	-1.16649	2.62e-26
ENSG00000103528	SYT17	-1.137	2.28e-21
ENSG00000103534	TMC5	-2.20671	1.82e-49
ENSG00000103549	RNF40	-1.21594	5.1e-49
ENSG00000103550	KNOP1	-1.29009	6.83e-34
ENSG00000103647	CORO2B	-1.21699	2.51e-06
ENSG00000103653	CSK	-1.30122	1.14e-43
ENSG00000103671	TRIP4	-1.21871	1.43e-26
ENSG00000103707	MTFMT	-1.50167	6.88e-28
ENSG00000103710	RASL12	4.33886	3.99e-25
ENSG00000103740	ACSBG1	3.23023	4.24e-05
ENSG00000103811	CTSH	1.36943	4.44e-34
ENSG00000103932	RPAP1	-1.23277	9.12e-21
ENSG00000103966	EHD4	1.19277	2.94e-24
ENSG00000103995	CEP152	-1.39729	1.22e-13
ENSG00000104047	DTWD1	-1.87574	1.72e-23
ENSG00000104064	GABPB1	1.98442	7.3e-57
ENSG00000104129	DNAJC17	-1.88513	5.43e-15
ENSG00000104131	EIF3J	-1.14825	1.45e-36
ENSG00000104140	RHOV	-1.21337	3.26e-12
ENSG00000104142	VPS18	-1.49286	1.18e-27
ENSG00000104147	OIP5	-1.56643	4.48e-18
ENSG00000104221	BRF2	-1.47192	1.02e-15
ENSG00000104228	TRIM35	-1.95734	2.54e-38
ENSG00000104324	CPQ	1.05286	5.86e-07
ENSG00000104331	IMPAD1	1.90089	7.73e-155
ENSG00000104332	SFRP1	1.22439	3.95e-54
ENSG00000104341	LAPTM4B	1.42833	1e-33
ENSG00000104361	NIPAL2	1.27996	3.7e-17
ENSG00000104365	IKBKB	-1.30607	8.16e-45
ENSG00000104412	EMC2	-1.01507	7.81e-16
ENSG00000104415	WISP1	2.29887	0.00542736
ENSG00000104419	NDRG1	-1.24658	3.06e-44
ENSG00000104427	ZC2HC1A	-1.6883	1.41e-17
ENSG00000104432	IL7	4.97665	2.11e-10
ENSG00000104442	ARMC1	-1.15549	3.46e-34
ENSG00000104490	NCALD	-2.80663	1.34e-65
ENSG00000104497	SNX16	2.41916	2.08e-57
ENSG00000104524	PYCR3	-2.4262	8.75e-31
ENSG00000104529	EEF1D	1.16302	2.33e-25
ENSG00000104611	SH2D4A	-1.07868	1.82e-31
ENSG00000104660	LEPROTL1	1.43746	4.03e-23
ENSG00000104679	R3HCC1	-1.41722	7.36e-34
ENSG00000104687	GSR	-1.02115	2.29e-50
ENSG00000104689	TNFRSF10A	2.31238	1.01e-45
ENSG00000104691	UBXN8	1.2715	6.58e-10
ENSG00000104714	ERICH1	-1.34558	1.44e-23
ENSG00000104723	TUSC3	1.15849	1.23e-33
ENSG00000104725	NA	2.74101	9.58e-36
ENSG00000104738	MCM4	-1.44958	5.41e-76
ENSG00000104760	FGL1	1.24844	5.85e-62
ENSG00000104763	ASAH1	1.28581	7.37e-21
ENSG00000104783	KCNN4	-1.69471	1.91e-40
ENSG00000104808	DHDH	1.97709	6.55e-12
ENSG00000104812	GYS1	-1.70373	1.77e-46
ENSG00000104818	CGB2	6.91313	1.04e-08
ENSG00000104833	TUBB4A	-2.22299	6.12e-26
ENSG00000104835	SARS2	-1.44657	9.89e-10
ENSG00000104853	CLPTM1	1.01677	4.19e-21
ENSG00000104856	RELB	1.03594	1.37e-27
ENSG00000104859	CLASRP	1.17898	1.3e-49
ENSG00000104866	PPP1R37	-1.03318	1.08e-26
ENSG00000104870	FCGRT	1.02652	2.01e-36
ENSG00000104880	ARHGEF18	-1.19186	2.54e-24
ENSG00000104883	PEX11G	-2.24421	1.56e-08
ENSG00000104884	ERCC2	-1.93075	7.16e-53
ENSG00000104886	PLEKHJ1	-1.6306	5.68e-40
ENSG00000104888	SLC17A7	1.40028	4.54e-05
ENSG00000104901	DKKL1	1.77004	9.67e-05
ENSG00000104903	LYL1	3.22617	0.000132566
ENSG00000104904	OAZ1	1.9652	1.08e-92
ENSG00000104941	RSPH6A	7.44926	9.49e-46
ENSG00000104946	TBC1D17	-1.53674	7.25e-54
ENSG00000104951	IL4I1	6.85259	1.04e-100
ENSG00000104957	CCDC130	-1.03088	1.9e-13
ENSG00000104967	NOVA2	-2.67506	2.32e-05
ENSG00000104976	SNAPC2	-1.04023	1.55e-14
ENSG00000104983	CCDC61	-1.74955	2.84e-09
ENSG00000105011	ASF1B	-1.93371	3.49e-51
ENSG00000105048	TNNT1	1.06883	2.72e-40
ENSG00000105053	VRK3	-1.15254	8.87e-28
ENSG00000105063	PPP6R1	-1.01789	9.99e-40
ENSG00000105072	C19orf44	-1.67653	1.54e-15
ENSG00000105085	MED26	2.21782	1.11e-49
ENSG00000105131	EPHX3	3.43349	2.67e-09
ENSG00000105135	ILVBL	-1.03985	1.88e-27
ENSG00000105146	AURKC	5.97975	5.71e-73
ENSG00000105173	CCNE1	-1.3811	2.28e-16
ENSG00000105186	ANKRD27	-1.09054	3.66e-33
ENSG00000105193	RPS16	1.60313	9.56e-48
ENSG00000105204	DYRK1B	-1.15971	1e-26
ENSG00000105219	CNTD2	4.24109	7.55e-52
ENSG00000105245	NUMBL	-1.36132	1.09e-42
ENSG00000105246	EBI3	1.2722	0.000145849
ENSG00000105248	YJU2	-1.38577	7.09e-16
ENSG00000105254	TBCB	1.11204	8.59e-55
ENSG00000105255	FSD1	-1.10694	6.98e-08
ENSG00000105261	OVOL3	1.93584	1.37e-05
ENSG00000105287	PRKD2	1.79355	1.17e-107
ENSG00000105289	TJP3	-1.24057	4.34e-11
ENSG00000105290	APLP1	1.26469	6.15e-39
ENSG00000105325	FZR1	-1.93943	6.65e-58
ENSG00000105327	BBC3	3.67499	0
ENSG00000105357	MYH14	-1.43957	4.71e-30
ENSG00000105369	CD79A	6.41984	1e-212
ENSG00000105371	ICAM4	11.4599	3.41e-188
ENSG00000105372	RPS19	1.91036	6.09e-134
ENSG00000105376	ICAM5	2.6406	2.46e-09
ENSG00000105388	CEACAM5	2.01483	0.0138995
ENSG00000105402	NAPA	1.44777	5.86e-52
ENSG00000105404	RABAC1	1.29414	2.08e-37
ENSG00000105427	CNFN	1.88397	9.15e-16
ENSG00000105438	KDELR1	1.00667	1.25e-49
ENSG00000105443	CYTH2	-1.89831	1.06e-93
ENSG00000105447	GRWD1	-1.16256	2.19e-41
ENSG00000105467	SYNGR4	1.03834	0.0015325
ENSG00000105472	CLEC11A	1.43088	9.65e-21
ENSG00000105479	CCDC114	-1.70148	0.0111855
ENSG00000105499	PLA2G4C	2.01237	1.21e-23
ENSG00000105514	RAB3D	-2.06995	2.64e-59
ENSG00000105516	DBP	-1.57932	5.88e-10
ENSG00000105519	CAPS	-1.17979	1.19e-09
ENSG00000105523	FAM83E	7.01088	0
ENSG00000105556	MIER2	-1.41918	2.42e-21
ENSG00000105559	PLEKHA4	5.70779	1.68e-158
ENSG00000105583	WDR83OS	1.35239	9.55e-58
ENSG00000105612	DNASE2	1.02989	2.78e-20
ENSG00000105613	MAST1	1.89774	2.56e-23
ENSG00000105617	LENG1	-1.83647	2.31e-23
ENSG00000105639	JAK3	-1.85584	4.44e-11
ENSG00000105640	RPL18A	1.56415	4.49e-86
ENSG00000105641	SLC5A5	3.43999	3.79e-09
ENSG00000105642	KCNN1	1.40462	3.07e-05
ENSG00000105649	RAB3A	1.63645	1.47e-05
ENSG00000105650	PDE4C	2.21111	2.86e-17
ENSG00000105655	ISYNA1	-1.10721	6.36e-24
ENSG00000105668	UPK1A	1.14325	0.00291104
ENSG00000105672	ETV2	1.56455	4.56e-09
ENSG00000105675	ATP4A	7.0021	2.5e-09
ENSG00000105676	ARMC6	-1.55448	2.24e-33
ENSG00000105677	TMEM147	1.31109	6.22e-19
ENSG00000105696	TMEM59L	1.30688	5.19e-06
ENSG00000105698	USF2	1.25167	7.22e-67
ENSG00000105699	LSR	1.15383	8.88e-17
ENSG00000105705	SUGP1	-1.31479	2.14e-21
ENSG00000105707	HPN	7.41462	1.36e-172
ENSG00000105711	SCN1B	1.04109	8.62e-17
ENSG00000105737	GRIK5	1.56268	1.12e-07
ENSG00000105738	SIPA1L3	-1.79624	9.11e-114
ENSG00000105767	CADM4	1.17783	3.58e-20
ENSG00000105771	SMG9	-1.52521	8e-49
ENSG00000105808	RASA4	-2.28388	0.0118377
ENSG00000105825	TFPI2	1.20067	1.25e-24
ENSG00000105849	TWISTNB	2.42771	1.36e-185
ENSG00000105852	PON3	1.53285	1.71e-86
ENSG00000105854	PON2	1.45804	7.49e-47
ENSG00000105856	HBP1	-1.18156	3.72e-29
ENSG00000105875	WDR91	-1.95284	5.15e-26
ENSG00000105887	MTPN	1.1437	7.78e-57
ENSG00000105926	MPP6	-1.83387	1.35e-43
ENSG00000105929	ATP6V0A4	4.15656	5.43e-24
ENSG00000105939	ZC3HAV1	3.77955	0
ENSG00000105953	OGDH	-1.08587	9.71e-35
ENSG00000105974	CAV1	1.30292	8.94e-74
ENSG00000105982	RNF32	1.65944	9.76e-07
ENSG00000105988	NHP2P1	1.14238	3.05e-07
ENSG00000105991	HOXA1	1.68784	1.2e-19
ENSG00000105996	HOXA2	4.91954	9.15e-232
ENSG00000105997	HOXA3	1.13809	1.28e-19
ENSG00000106003	LFNG	-3.02644	1.1e-67
ENSG00000106004	HOXA5	1.73041	9.35e-20
ENSG00000106006	HOXA6	1.30662	0.00221805
ENSG00000106009	BRAT1	-1.7164	8.94e-72
ENSG00000106025	TSPAN12	1.04259	0.00022116
ENSG00000106031	HOXA13	-1.21313	5.09e-07
ENSG00000106034	CPED1	6.94657	4.12e-05
ENSG00000106077	ABHD11	-1.67154	2.07e-20
ENSG00000106123	EPHB6	-1.51877	0.000233584
ENSG00000106153	CHCHD2	1.43193	2.06e-95
ENSG00000106178	CCL24	2.49448	0.0358512
ENSG00000106211	HSPB1	1.64887	3.86e-105
ENSG00000106266	SNX8	-1.27482	7.31e-28
ENSG00000106268	NUDT1	1.31073	4.97e-38
ENSG00000106299	WASL	-1.88431	4.6e-54
ENSG00000106305	AIMP2	-2.02008	2.26e-69
ENSG00000106328	FSCN3	4.19798	1.53e-18
ENSG00000106344	RBM28	-1.448	3.55e-49
ENSG00000106346	USP42	1.82169	1.08e-84
ENSG00000106351	AGFG2	-2.17575	6.57e-58
ENSG00000106366	SERPINE1	3.8854	1.21e-47
ENSG00000106384	MOGAT3	4.27885	5.02e-09
ENSG00000106460	TMEM106B	1.01073	2.43e-39
ENSG00000106462	EZH2	-1.23371	5.82e-35
ENSG00000106537	TSPAN13	1.21686	2.47e-22
ENSG00000106541	AGR2	2.10174	2.04e-194
ENSG00000106560	GIMAP2	4.82749	1.16e-13
ENSG00000106571	GLI3	4.98956	1.36e-19
ENSG00000106605	BLVRA	-1.3308	1.03e-46
ENSG00000106608	URGCP	1.206	2.55e-43
ENSG00000106624	AEBP1	7.5854	6.03e-21
ENSG00000106665	CLIP2	-1.95682	1.57e-89
ENSG00000106683	LIMK1	-1.3584	6.85e-53
ENSG00000106785	TRIM14	2.83625	2.57e-135
ENSG00000106803	SEC61B	1.05563	1.15e-42
ENSG00000106829	TLE4	1.90168	2.66e-74
ENSG00000106852	LHX6	3.43328	6.65e-13
ENSG00000106868	SUSD1	1.18088	1.54e-30
ENSG00000106948	AKNA	-1.8723	3.99e-26
ENSG00000106991	ENG	6.12318	1.02e-10
ENSG00000107021	TBC1D13	-1.7808	5.64e-56
ENSG00000107036	RIC1	-1.32245	6.95e-34
ENSG00000107077	KDM4C	-1.03849	4.09e-16
ENSG00000107104	KANK1	-1.68435	5.46e-44
ENSG00000107105	ELAVL2	4.05143	0.00290889
ENSG00000107140	TESK1	-1.16337	4.39e-24
ENSG00000107185	RGP1	-1.59573	3.15e-55
ENSG00000107187	LHX3	8.88661	4.92e-18
ENSG00000107201	DDX58	4.9313	2.24e-134
ENSG00000107242	PIP5K1B	4.6465	1.6e-11
ENSG00000107249	GLIS3	-1.94387	3.12e-58
ENSG00000107295	SH3GL2	4.33434	1.22e-09
ENSG00000107317	PTGDS	2.57689	2.02e-05
ENSG00000107338	SHB	-1.13165	1.71e-12
ENSG00000107341	UBE2R2	-1.02208	5.51e-37
ENSG00000107371	EXOSC3	-1.46445	1.06e-24
ENSG00000107485	GATA3	2.86654	2.45e-73
ENSG00000107551	RASSF4	-1.73031	1.25e-10
ENSG00000107611	CUBN	1.32428	0.0426729
ENSG00000107625	DDX50	-1.31172	1.39e-31
ENSG00000107651	SEC23IP	-1.12607	1.22e-37
ENSG00000107672	NSMCE4A	-1.30053	5.34e-54
ENSG00000107719	PALD1	-1.97504	1.86e-27
ENSG00000107742	SPOCK2	3.84254	3.09e-90
ENSG00000107771	CCSER2	-1.16845	2.61e-20
ENSG00000107798	LIPA	2.48256	2.37e-61
ENSG00000107831	FGF8	5.29079	3.58e-16
ENSG00000107864	CPEB3	2.98122	1.07e-50
ENSG00000107872	FBXL15	-1.2242	3.13e-10
ENSG00000107882	SUFU	-1.47017	2.48e-24
ENSG00000107954	NEURL1	-1.65362	2.24e-05
ENSG00000107957	SH3PXD2A	-1.5774	2.6e-35
ENSG00000107960	STN1	-1.42219	1.29e-23
ENSG00000107968	MAP3K8	2.56252	1.19e-224
ENSG00000107984	DKK1	-1.62733	3.33e-70
ENSG00000108061	SHOC2	-1.17175	3.73e-27
ENSG00000108107	RPL28	1.18245	2.74e-17
ENSG00000108175	ZMIZ1	-1.38508	8.41e-63
ENSG00000108219	TSPAN14	-1.51702	2.04e-100
ENSG00000108294	NA	1.00534	3.33e-44
ENSG00000108296	NA	1.5146	6.68e-72
ENSG00000108298	RPL19	1.59459	1.72e-110
ENSG00000108306	FBXL20	-1.57658	3.45e-23
ENSG00000108309	RUNDC3A	1.64882	0.008687
ENSG00000108342	CSF3	6.1454	1e-20
ENSG00000108352	RAPGEFL1	1.99086	3.99e-43
ENSG00000108379	WNT3	-1.60401	1.57e-28
ENSG00000108387	2019-09-04	1.4514	2.01e-07
ENSG00000108389	MTMR4	-2.1195	2.47e-32
ENSG00000108433	GOSR2	-1.20115	2.96e-16
ENSG00000108439	PNPO	-1.25909	3.21e-21
ENSG00000108448	TRIM16L	-1.98972	8.69e-181
ENSG00000108469	RECQL5	-1.52383	2.05e-47
ENSG00000108479	GALK1	-1.1576	1.38e-21
ENSG00000108518	PFN1	1.36747	1.15e-94
ENSG00000108528	SLC25A11	-1.33744	3.32e-45
ENSG00000108557	RAI1	-1.46272	9e-71
ENSG00000108559	NUP88	-1.21291	1.26e-43
ENSG00000108576	SLC6A4	5.67005	2.01e-30
ENSG00000108587	GOSR1	1.003	5.91e-37
ENSG00000108588	CCDC47	1.2372	6.28e-24
ENSG00000108592	FTSJ3	-1.09198	1.93e-39
ENSG00000108599	AKAP10	-1.24083	1.12e-34
ENSG00000108604	SMARCD2	-1.03839	8.48e-34
ENSG00000108679	LGALS3BP	2.6309	0
ENSG00000108684	ASIC2	1.33149	0.0470679
ENSG00000108688	CCL7	5.09122	1.24e-05
ENSG00000108691	CCL2	5.72866	5.41e-114
ENSG00000108733	PEX12	2.03358	5.39e-68
ENSG00000108771	DHX58	8.94345	5.02e-270
ENSG00000108788	MLX	-1.23014	1.36e-40
ENSG00000108799	EZH1	-1.5082	7.98e-40
ENSG00000108826	MRPL27	-1.44928	3.17e-33
ENSG00000108830	RND2	1.35504	0.00412299
ENSG00000108840	HDAC5	-1.32264	6.57e-31
ENSG00000108852	MPP2	-2.66523	6.62e-21
ENSG00000108883	EFTUD2	-1.2883	4.6e-69
ENSG00000108924	HLF	-2.27306	1.22e-05
ENSG00000108932	SLC16A6	2.50406	1.18e-13
ENSG00000108958	ENSG00000108958	1.37038	5.54e-19
ENSG00000108963	DPH1	-1.64789	1.3e-44
ENSG00000109062	SLC9A3R1	-1.16751	3.2e-43
ENSG00000109063	MYH3	4.21273	3.34e-167
ENSG00000109065	NAT9	-1.7192	3.17e-66
ENSG00000109066	TMEM104	-1.3947	2.16e-39
ENSG00000109072	VTN	1.19625	4.75e-08
ENSG00000109079	TNFAIP1	-1.24542	4.35e-48
ENSG00000109107	ALDOC	2.63892	1.77e-123
ENSG00000109118	PHF12	1.23311	9.55e-53
ENSG00000109180	OCIAD1	1.58638	8.54e-80
ENSG00000109265	KIAA1211	-2.51811	1.49e-14
ENSG00000109320	NFKB1	1.14102	1.04e-41
ENSG00000109321	AREG	1.71406	4.03e-05
ENSG00000109323	MANBA	1.8826	1.6e-97
ENSG00000109390	NDUFC1	1.01912	6.51e-23
ENSG00000109445	ZNF330	1.08043	1.85e-24
ENSG00000109452	INPP4B	-1.25966	1.94e-20
ENSG00000109472	CPE	1.4978	1.27e-08
ENSG00000109475	RPL34	1.2581	4.66e-72
ENSG00000109501	WFS1	-1.10907	3.65e-12
ENSG00000109511	ANXA10	1.41852	0.00701069
ENSG00000109534	GAR1	-1.09382	3.44e-14
ENSG00000109667	SLC2A9	5.16408	3.58e-104
ENSG00000109670	FBXW7	1.35745	4.4e-33
ENSG00000109674	NEIL3	-2.54922	3.36e-78
ENSG00000109686	SH3D19	-1.96142	6.15e-66
ENSG00000109743	BST1	1.6584	9.28e-23
ENSG00000109771	LRP2BP	2.44107	3.68e-08
ENSG00000109775	UFSP2	-1.20508	1.17e-10
ENSG00000109794	FAM149A	1.01937	2.05e-05
ENSG00000109805	NCAPG	-1.85245	9.46e-68
ENSG00000109819	PPARGC1A	-3.1104	0.000155718
ENSG00000109846	CRYAB	1.58649	0.00016336
ENSG00000109911	ELP4	-1.36924	2.93e-19
ENSG00000109927	TECTA	5.11917	8.5e-96
ENSG00000110011	DNAJC4	1.47687	9.15e-43
ENSG00000110013	SIAE	1.17821	3.45e-21
ENSG00000110042	DTX4	-1.01598	5.17e-11
ENSG00000110046	ATG2A	-1.71855	2e-49
ENSG00000110060	PUS3	1.58462	9.14e-24
ENSG00000110076	NRXN2	4.84895	6.78e-50
ENSG00000110169	HPX	1.59483	0.000188117
ENSG00000110171	TRIM3	-1.27973	1.08e-21
ENSG00000110200	ANAPC15	1.76757	2.03e-86
ENSG00000110237	ARHGEF17	-1.75108	5.66e-55
ENSG00000110274	CEP164	-1.15261	1.57e-22
ENSG00000110318	CEP126	-1.26341	1.11e-14
ENSG00000110321	EIF4G2	1.72925	3.06e-145
ENSG00000110375	UPK2	2.11014	0.0230052
ENSG00000110422	HIPK3	1.77914	2.82e-97
ENSG00000110455	ACCS	-1.16776	7.86e-28
ENSG00000110492	MDK	2.98764	5.33e-177
ENSG00000110497	AMBRA1	1.23155	4.66e-47
ENSG00000110583	NAA40	-2.30805	3.99e-76
ENSG00000110700	RPS13	1.81594	2.51e-83
ENSG00000110713	NUP98	-1.04936	5e-39
ENSG00000110852	CLEC2B	2.62838	1.54e-28
ENSG00000110876	SELPLG	4.99693	4.5e-97
ENSG00000110880	CORO1C	-1.33831	1.14e-66
ENSG00000110921	MVK	-2.64492	1.79e-113
ENSG00000110931	CAMKK2	-1.29539	4.19e-40
ENSG00000111011	RSRC2	2.54067	3.5e-237
ENSG00000111012	CYP27B1	1.05756	3.68e-06
ENSG00000111052	LIN7A	-1.39816	9.65e-09
ENSG00000111077	TNS2	-2.08387	4.61e-92
ENSG00000111110	PPM1H	-1.1861	1.77e-20
ENSG00000111181	SLC6A12	3.15686	5.55e-09
ENSG00000111186	WNT5B	-1.69472	3.83e-10
ENSG00000111224	PARP11	-1.01241	2.45e-05
ENSG00000111229	ARPC3	1.49138	1.28e-61
ENSG00000111254	AKAP3	2.90298	8.9e-07
ENSG00000111266	DUSP16	1.36597	1.04e-50
ENSG00000111271	ACAD10	-1.11803	7.88e-25
ENSG00000111276	CDKN1B	2.32924	1.83e-207
ENSG00000111300	NAA25	1.08746	2.75e-41
ENSG00000111325	OGFOD2	-1.63005	5.45e-06
ENSG00000111331	OAS3	3.7453	0
ENSG00000111335	OAS2	10.6376	0
ENSG00000111405	ENDOU	8.5561	4.57e-20
ENSG00000111445	RFC5	-1.99935	3.22e-63
ENSG00000111490	TBC1D30	-2.17911	6.57e-14
ENSG00000111540	RAB5B	-1.65793	2.16e-33
ENSG00000111554	MDM1	-1.21709	2.6e-15
ENSG00000111640	GAPDH	1.29548	7.63e-87
ENSG00000111647	UHRF1BP1L	-1.53116	7.08e-33
ENSG00000111653	ING4	-1.38671	2.66e-30
ENSG00000111664	GNB3	2.01435	1.47e-20
ENSG00000111666	CHPT1	1.52353	1.67e-44
ENSG00000111671	SPSB2	-2.21771	7.29e-66
ENSG00000111674	ENO2	-1.15093	6.82e-38
ENSG00000111678	C12orf57	1.47461	1.08e-88
ENSG00000111679	PTPN6	1.508	7.78e-66
ENSG00000111696	NT5DC3	-1.88985	2.43e-34
ENSG00000111711	GOLT1B	1.13452	4.94e-31
ENSG00000111713	GYS2	4.27583	1.72e-73
ENSG00000111725	PRKAB1	-1.28077	5.66e-33
ENSG00000111728	ST8SIA1	2.36861	2.38e-07
ENSG00000111729	CLEC4A	3.57467	6.56e-09
ENSG00000111737	RAB35	-1.28908	2e-46
ENSG00000111775	COX6A1	2.06957	6.13e-50
ENSG00000111790	FGFR1OP2	1.79351	4.77e-61
ENSG00000111801	BTN3A3	1.9252	3.88e-32
ENSG00000111834	RSPH4A	3.52379	9.91e-27
ENSG00000111837	MAK	3.57884	2.76e-10
ENSG00000111843	TMEM14C	1.6892	1.52e-63
ENSG00000111850	SMIM8	-1.3199	0.000125285
ENSG00000111877	MCM9	-1.7864	3.37e-29
ENSG00000111886	GABRR2	3.83219	2.76e-27
ENSG00000111912	NCOA7	4.04748	0
ENSG00000111961	SASH1	1.16909	6.37e-26
ENSG00000111962	UST	-1.05109	8.37e-09
ENSG00000111981	ULBP1	1.77024	1.69e-24
ENSG00000112029	FBXO5	1.2815	1.62e-36
ENSG00000112031	MTRF1L	1.21996	4.49e-32
ENSG00000112039	FANCE	-1.00793	3.85e-05
ENSG00000112062	MAPK14	-1.99701	1.92e-75
ENSG00000112110	MRPL18	-1.05093	4.41e-26
ENSG00000112130	RNF8	-1.16971	1.17e-16
ENSG00000112139	MDGA1	1.61913	2.08e-36
ENSG00000112144	ICK	1.58708	1.8e-48
ENSG00000112149	CD83	3.14865	1.08e-81
ENSG00000112167	SAYSD1	-1.26423	1.06e-13
ENSG00000112218	GPR63	-1.42047	0.00011729
ENSG00000112234	FBXL4	-1.92009	5.9e-48
ENSG00000112242	E2F3	1.22249	4.96e-43
ENSG00000112245	PTP4A1	1.87778	2.02e-162
ENSG00000112246	SIM1	5.87793	3.02e-11
ENSG00000112297	CRYBG1	3.6417	4.52e-19
ENSG00000112303	VNN2	2.15921	0.0193716
ENSG00000112306	RPS12	1.92218	1.37e-48
ENSG00000112319	EYA4	-1.63223	1.79e-51
ENSG00000112343	TRIM38	1.53136	6e-22
ENSG00000112378	PERP	1.1513	2.17e-39
ENSG00000112394	SLC16A10	3.65241	5.66e-47
ENSG00000112425	EPM2A	-1.05772	0.000174149
ENSG00000112514	CUTA	1.22052	2.42e-58
ENSG00000112584	FAM120B	-1.71557	3.29e-40
ENSG00000112599	GUCA1B	1.31115	0.00130521
ENSG00000112651	MRPL2	-1.07526	1.63e-15
ENSG00000112659	CUL9	1.58868	2.27e-29
ENSG00000112667	DNPH1	1.40344	7.52e-56
ENSG00000112695	COX7A2	1.47655	1.13e-88
ENSG00000112697	TMEM30A	1.04567	7.89e-50
ENSG00000112715	VEGFA	2.53721	2.98e-31
ENSG00000112742	TTK	-1.25276	1.63e-24
ENSG00000112759	SLC29A1	-1.35711	1.61e-58
ENSG00000112763	BTN2A1	1.19095	4.87e-36
ENSG00000112769	LAMA4	1.19094	0.0259526
ENSG00000112773	TENT5A	4.09054	0
ENSG00000112837	TBX18	-1.63886	9.55e-68
ENSG00000112851	ERBIN	-1.1264	1.34e-38
ENSG00000112874	NUDT12	-1.81561	5.1e-08
ENSG00000112877	CEP72	-2.15729	2.59e-26
ENSG00000112983	BRD8	-1.58578	1.31e-69
ENSG00000112996	MRPS30	-1.51344	1.45e-39
ENSG00000113048	MRPS27	-1.31274	1.2e-60
ENSG00000113070	HBEGF	3.58424	5.81e-122
ENSG00000113108	APBB3	-1.58969	6.78e-17
ENSG00000113119	TMCO6	-1.67105	3.27e-24
ENSG00000113140	SPARC	2.13407	3.01e-12
ENSG00000113161	HMGCR	1.4086	1.94e-32
ENSG00000113272	THG1L	-1.21873	1.66e-24
ENSG00000113300	CNOT6	1.33872	2.04e-61
ENSG00000113318	MSH3	-1.56864	1.62e-28
ENSG00000113368	LMNB1	-1.24191	1.27e-41
ENSG00000113369	ARRDC3	3.06209	0
ENSG00000113456	RAD1	-1.20281	1.82e-25
ENSG00000113460	BRIX1	1.55002	5.55e-75
ENSG00000113520	IL4	8.74988	6.34e-40
ENSG00000113522	RAD50	-1.06008	2.06e-31
ENSG00000113525	IL5	6.74558	1.09e-09
ENSG00000113532	ST8SIA4	1.22075	4.64e-42
ENSG00000113558	SKP1	1.24834	1.23e-24
ENSG00000113583	C5orf15	1.72131	4.58e-123
ENSG00000113593	PPWD1	-1.09715	8.84e-19
ENSG00000113594	LIFR	2.83931	3.65e-120
ENSG00000113615	SEC24A	1.20766	1.21e-29
ENSG00000113638	TTC33	1.47383	2.33e-21
ENSG00000113643	RARS	-1.39469	2.36e-61
ENSG00000113645	WWC1	-1.57355	4.59e-86
ENSG00000113658	SMAD5	-1.5056	1.42e-35
ENSG00000113719	ERGIC1	1.24771	9.24e-23
ENSG00000113732	ATP6V0E1	1.07047	3.73e-50
ENSG00000113739	STC2	1.06719	0.00123651
ENSG00000113742	CPEB4	1.26825	1.83e-20
ENSG00000113749	HRH2	1.09796	0.0147606
ENSG00000113758	DBN1	-1.1338	6.89e-43
ENSG00000113761	ZNF346	-1.49755	1.56e-22
ENSG00000113811	SELENOK	1.79455	4.46e-82
ENSG00000113851	CRBN	-1.1534	5.74e-23
ENSG00000113905	HRG	5.44136	2.44e-23
ENSG00000113916	BCL6	2.06662	6.24e-136
ENSG00000113924	HGD	-1.07739	4.18e-42
ENSG00000113966	ARL6	-2.13212	5.01e-14
ENSG00000114019	AMOTL2	1.67249	5.33e-34
ENSG00000114023	FAM162A	1.04694	8.95e-21
ENSG00000114098	ARMC8	-1.16	2.21e-20
ENSG00000114115	RBP1	1.40105	0.000590137
ENSG00000114120	SLC25A36	1.20015	7.32e-46
ENSG00000114124	GRK7	5.10731	1.18e-11
ENSG00000114126	TFDP2	-1.44837	8.45e-32
ENSG00000114200	BCHE	2.07035	6.49e-35
ENSG00000114209	PDCD10	-1.87796	4.87e-50
ENSG00000114268	PFKFB4	1.01842	1.87e-18
ENSG00000114279	FGF12	-1.2549	0.0398822
ENSG00000114346	ECT2	-1.17776	4.68e-50
ENSG00000114374	USP9Y	1.02556	9.01e-29
ENSG00000114378	HYAL1	-1.19076	0.000475794
ENSG00000114391	RPL24	1.37836	1.08e-61
ENSG00000114395	CYB561D2	-1.25065	5.76e-12
ENSG00000114491	UMPS	-2.40242	2.19e-84
ENSG00000114503	NCBP2	-1.02555	7.36e-29
ENSG00000114544	SLC41A3	1.05795	9.74e-33
ENSG00000114573	ATP6V1A	1.35963	1.39e-67
ENSG00000114626	ABTB1	-1.83429	2.11e-57
ENSG00000114631	PODXL2	1.12402	3.21e-23
ENSG00000114638	UPK1B	1.41129	1.9e-37
ENSG00000114646	CSPG5	2.30164	1.47e-22
ENSG00000114735	HEMK1	-1.72831	5.68e-22
ENSG00000114737	CISH	-1.56708	0.00123387
ENSG00000114744	COMMD2	-1.3458	2.93e-33
ENSG00000114745	GORASP1	-1.40145	3.28e-41
ENSG00000114767	RRP9	-1.56195	3.93e-32
ENSG00000114812	VIPR1	2.06531	6.95e-08
ENSG00000114853	ZBTB47	-1.57141	2.44e-15
ENSG00000114854	TNNC1	2.34108	9.24e-06
ENSG00000114859	CLCN2	-1.65717	3.64e-14
ENSG00000114902	SPCS1	1.50484	5.64e-41
ENSG00000114942	EEF1B2	1.78844	1.05e-147
ENSG00000114956	DGUOK	1.43642	5.94e-76
ENSG00000114982	KANSL3	-1.19432	2.91e-38
ENSG00000114993	RTKN	-2.08327	3.47e-53
ENSG00000115008	IL1A	6.9626	1.04e-86
ENSG00000115009	CCL20	5.08624	3.87e-57
ENSG00000115107	STEAP3	-1.21637	3.1e-46
ENSG00000115109	EPB41L5	-1.01968	7.02e-24
ENSG00000115112	TFCP2L1	-1.33058	3.61e-24
ENSG00000115128	SF3B6	1.52108	6.83e-86
ENSG00000115145	STAM2	-1.28082	6.62e-30
ENSG00000115155	OTOF	1.88782	0.000584277
ENSG00000115163	CENPA	-1.58026	4.02e-39
ENSG00000115165	CYTIP	1.76473	0.00136494
ENSG00000115183	TANC1	-1.41893	1.82e-28
ENSG00000115194	SLC30A3	-2.08044	2.5e-16
ENSG00000115216	NRBP1	-1.11151	1.56e-50
ENSG00000115221	ITGB6	1.05917	1.8e-10
ENSG00000115232	ITGA4	1.77878	0.000253249
ENSG00000115252	PDE1A	-1.2131	7.22e-05
ENSG00000115257	PCSK4	-1.22247	2.48e-05
ENSG00000115263	GCG	11.8988	2.15e-246
ENSG00000115266	APC2	2.54947	6.1e-40
ENSG00000115267	IFIH1	6.78096	5.11e-162
ENSG00000115268	RPS15	1.75257	5.75e-70
ENSG00000115271	GCA	1.53898	1.7e-45
ENSG00000115274	INO80B	-1.29531	3.13e-32
ENSG00000115282	TTC31	-1.33652	3.1e-34
ENSG00000115286	NDUFS7	1.35126	9.02e-52
ENSG00000115289	PCGF1	2.12992	1.47e-102
ENSG00000115290	GRB14	-1.27589	2.67e-27
ENSG00000115317	HTRA2	-1.65234	1.12e-40
ENSG00000115318	LOXL3	-2.68623	0.0138637
ENSG00000115325	DOK1	-1.2715	6.31e-12
ENSG00000115339	GALNT3	4.81455	1.77e-29
ENSG00000115350	POLE4	1.77632	5.43e-53
ENSG00000115353	TACR1	-4.76012	3.56e-05
ENSG00000115363	EVA1A	1.11545	0.0263028
ENSG00000115380	EFEMP1	1.97321	2.86e-41
ENSG00000115392	FANCL	-1.33381	6.64e-36
ENSG00000115415	STAT1	2.55661	9.87e-85
ENSG00000115421	PAPOLG	1.39273	2.19e-47
ENSG00000115423	DNAH6	1.41661	0.0417538
ENSG00000115507	OTX1	1.88899	1.4e-32
ENSG00000115514	TXNDC9	-1.8556	8.7e-55
ENSG00000115523	GNLY	8.05079	1.81e-68
ENSG00000115526	CHST10	-1.39745	9.64e-26
ENSG00000115561	CHMP3	1.04025	5.71e-43
ENSG00000115568	ZNF142	-1.23199	1.11e-20
ENSG00000115598	IL1RL2	9.11693	2.08e-51
ENSG00000115604	IL18R1	1.25491	2.83e-11
ENSG00000115607	IL18RAP	7.86491	2.29e-46
ENSG00000115648	MLPH	-1.3631	2.24e-89
ENSG00000115649	CNPPD1	-1.83406	4.6e-64
ENSG00000115652	UXS1	1.57504	4.26e-89
ENSG00000115657	ABCB6	-1.82229	5.06e-13
ENSG00000115718	PROC	-2.34422	6.98e-20
ENSG00000115738	ID2	3.65827	0
ENSG00000115762	PLEKHB2	1.33876	3.25e-74
ENSG00000115806	GORASP2	-1.31615	1.35e-58
ENSG00000115828	QPCT	1.02784	2.44e-15
ENSG00000115844	DLX2	4.27502	3.66e-43
ENSG00000115850	LCT	3.98889	1.04e-05
ENSG00000115875	SRSF7	1.02776	6.69e-48
ENSG00000115919	KYNU	-1.42616	9.81e-97
ENSG00000115942	ORC2	-1.08164	2.07e-29
ENSG00000115956	PLEK	6.9583	5.1e-09
ENSG00000115963	RND3	3.87053	0
ENSG00000115970	THADA	-1.21487	2.74e-45
ENSG00000115998	C2orf42	2.28169	4.92e-113
ENSG00000116014	KISS1R	-1.89766	0.0471299
ENSG00000116062	MSH6	-1.69273	5.59e-98
ENSG00000116095	PLEKHA3	-1.02287	1.05e-13
ENSG00000116133	DHCR24	-1.65329	8.97e-121
ENSG00000116138	DNAJC16	-1.00855	6.93e-16
ENSG00000116161	CACYBP	2.10442	5.09e-183
ENSG00000116191	RALGPS2	-1.39324	1.59e-29
ENSG00000116194	ANGPTL1	6.15548	1.11e-25
ENSG00000116205	TCEANC2	-1.53828	2.99e-10
ENSG00000116209	TMEM59	1.43992	9.08e-57
ENSG00000116213	WRAP73	-1.2463	8.1e-21
ENSG00000116251	RPL22	1.47683	6.3e-52
ENSG00000116254	CHD5	5.77854	4.56e-153
ENSG00000116288	PARK7	1.12617	1.3e-56
ENSG00000116396	KCNC4	-1.36326	2.93e-06
ENSG00000116406	EDEM3	1.26517	1.6e-21
ENSG00000116473	RAP1A	1.44554	5.51e-49
ENSG00000116514	RNF19B	1.3435	7.6e-44
ENSG00000116525	TRIM62	-1.84295	9.22e-08
ENSG00000116580	GON4L	-1.15381	2.41e-26
ENSG00000116663	FBXO6	1.42345	1.39e-19
ENSG00000116667	C1orf21	-1.09892	1.32e-07
ENSG00000116668	SWT1	-1.3381	1.45e-07
ENSG00000116675	DNAJC6	-1.41675	2.3e-11
ENSG00000116678	LEPR	1.09155	3.36e-08
ENSG00000116679	IVNS1ABP	-1.0289	4.16e-33
ENSG00000116690	PRG4	1.37285	1.2e-07
ENSG00000116717	GADD45A	3.7331	0
ENSG00000116741	RGS2	3.23224	1.52e-242
ENSG00000116745	RPE65	8.7075	1.4e-45
ENSG00000116752	BCAS2	-1.31189	1.09e-17
ENSG00000116761	CTH	-1.13684	1.15e-05
ENSG00000116785	CFHR3	1.18209	0.000328902
ENSG00000116809	ZBTB17	-1.52166	8.42e-22
ENSG00000116852	KIF21B	-1.22232	9.16e-11
ENSG00000116857	TMEM9	1.05186	9.38e-30
ENSG00000116871	MAP7D1	-1.42746	2.84e-59
ENSG00000116874	WARS2	-1.69486	3.02e-15
ENSG00000116922	C1orf109	1.70949	1.45e-65
ENSG00000116954	RRAGC	1.6215	6.07e-71
ENSG00000116984	MTR	-1.86001	7.72e-55
ENSG00000116990	MYCL	-1.6754	9.65e-05
ENSG00000117000	RLF	1.46982	1.34e-36
ENSG00000117009	KMO	3.04311	1.77e-06
ENSG00000117013	KCNQ4	1.43425	0.00646909
ENSG00000117016	RIMS3	-1.72025	2.97e-17
ENSG00000117036	ETV3	3.4766	1.39e-240
ENSG00000117133	RPF1	-1.14246	2.13e-19
ENSG00000117139	KDM5B	1.05099	1.44e-41
ENSG00000117143	UAP1	-1.52349	1.68e-30
ENSG00000117151	CTBS	1.60837	2.35e-39
ENSG00000117153	KLHL12	-1.46831	1.22e-40
ENSG00000117174	ZNHIT6	-1.47672	2.3e-33
ENSG00000117226	GBP3	4.69839	6.84e-134
ENSG00000117228	GBP1	8.51364	1.71e-175
ENSG00000117245	KIF17	2.05059	2.81e-16
ENSG00000117266	CDK18	1.31608	5.66e-15
ENSG00000117289	NA	4.30335	1.37e-154
ENSG00000117305	HMGCL	-1.3476	2.4e-24
ENSG00000117308	GALE	-1.48635	1.59e-44
ENSG00000117335	CD46	1.19989	1.59e-42
ENSG00000117410	ATP6V0B	2.36632	1.76e-37
ENSG00000117472	TSPAN1	1.05402	0.00753193
ENSG00000117481	NSUN4	-1.63252	1.72e-32
ENSG00000117560	FASLG	7.17681	1.96e-13
ENSG00000117586	TNFSF4	2.8949	0.0003608
ENSG00000117601	SERPINC1	5.98538	9.86e-52
ENSG00000117643	MAN1C1	-2.03304	0.00382742
ENSG00000117676	RPS6KA1	-2.15063	8.55e-46
ENSG00000117682	DHDDS	-1.22675	9.33e-15
ENSG00000117691	NENF	2.02026	3.76e-35
ENSG00000117707	PROX1	4.38332	1.55e-23
ENSG00000117724	CENPF	-2.18945	2.84e-164
ENSG00000117748	RPA2	-1.12317	3.54e-21
ENSG00000117751	PPP1R8	-1.30662	9.15e-32
ENSG00000117862	TXNDC12	1.65376	3.88e-77
ENSG00000117906	RCN2	1.32684	1.95e-42
ENSG00000117971	CHRNB4	-1.09313	0.0493211
ENSG00000117983	MUC5B	-1.39501	1.29e-47
ENSG00000118004	COLEC11	2.35154	1.65e-09
ENSG00000118096	IFT46	-1.73323	3.69e-20
ENSG00000118137	APOA1	4.86722	1.8e-17
ENSG00000118160	SLC8A2	3.91001	1.79e-53
ENSG00000118181	RPS25	1.3425	7.26e-84
ENSG00000118246	FASTKD2	-1.41491	6.93e-39
ENSG00000118257	NRP2	1.62908	7.09e-47
ENSG00000118260	CREB1	1.19063	3.28e-41
ENSG00000118263	KLF7	1.27463	7.74e-51
ENSG00000118271	TTR	1.91587	0.00445534
ENSG00000118369	USP35	-2.25353	3.33e-33
ENSG00000118407	FILIP1	-2.5349	4.14e-93
ENSG00000118420	UBE3D	-1.2263	2.17e-07
ENSG00000118432	CNR1	1.47273	0.000123397
ENSG00000118482	PHF3	-2.03456	8.02e-62
ENSG00000118496	FBXO30	1.02898	3.09e-29
ENSG00000118503	TNFAIP3	4.00784	0
ENSG00000118513	MYB	-2.1584	0.0288941
ENSG00000118514	ALDH8A1	3.19385	2.71e-20
ENSG00000118515	SGK1	2.41822	1.77e-87
ENSG00000118523	CTGF	3.29504	8.08e-56
ENSG00000118526	TCF21	-3.09917	2.02e-06
ENSG00000118579	MED28	-1.08891	6.13e-20
ENSG00000118655	DCLRE1B	-1.12221	1.46e-09
ENSG00000118680	MYL12B	1.16696	1.22e-62
ENSG00000118690	ARMC2	-1.21079	0.00729223
ENSG00000118705	RPN2	1.39624	7.26e-51
ENSG00000118785	SPP1	1.58362	7.4e-46
ENSG00000118804	STBD1	1.57669	7.84e-08
ENSG00000118849	RARRES1	2.30696	1.51e-104
ENSG00000118855	MFSD1	1.17927	6.92e-21
ENSG00000118894	EEF2KMT	-1.3638	4.04e-18
ENSG00000118898	PPL	-2.80478	5.91e-34
ENSG00000118900	UBN1	-1.37687	4.62e-49
ENSG00000118922	KLF12	-1.97342	6.81e-34
ENSG00000118946	PCDH17	-1.27559	0.0283969
ENSG00000118960	HS1BP3	-1.54051	4.57e-52
ENSG00000118961	LDAH	-1.04598	2.07e-24
ENSG00000118965	WDR35	1.47615	9.08e-64
ENSG00000118976	OTUD4P1	1.20563	1.77e-05
ENSG00000119013	NDUFB3	1.46784	5.13e-64
ENSG00000119041	GTF3C3	-1.21691	5.24e-40
ENSG00000119042	SATB2	1.29383	7.02e-23
ENSG00000119203	CPSF3	-1.28811	4.18e-48
ENSG00000119283	TRIM67	-1.45457	1.39e-05
ENSG00000119285	HEATR1	-1.04788	3.71e-35
ENSG00000119321	FKBP15	-1.08753	5.09e-26
ENSG00000119335	SET	1.31212	8.88e-83
ENSG00000119396	RAB14	1.37047	1.87e-76
ENSG00000119397	CNTRL	-1.50109	8.76e-31
ENSG00000119401	TRIM32	-1.31206	7.28e-30
ENSG00000119431	HDHD3	-1.9221	1.26e-50
ENSG00000119508	NR4A3	1.0716	9.66e-06
ENSG00000119509	INVS	-1.54571	1.71e-30
ENSG00000119522	DENND1A	-1.07367	5.47e-25
ENSG00000119547	ONECUT2	-1.60238	3.67e-13
ENSG00000119559	C19orf25	-1.13058	1.44e-10
ENSG00000119574	ZBTB45	-2.10558	1.63e-31
ENSG00000119596	YLPM1	-1.58337	7.44e-68
ENSG00000119599	DCAF4	-2.01626	8.96e-40
ENSG00000119630	PGF	3.4434	1.27e-15
ENSG00000119632	IFI27L2	1.42807	2.5e-31
ENSG00000119655	NPC2	1.47183	2.57e-81
ENSG00000119682	AREL1	-1.58834	7.5e-59
ENSG00000119684	MLH3	-1.33127	1.96e-33
ENSG00000119685	TTLL5	-1.40324	2.29e-31
ENSG00000119686	FLVCR2	-1.80155	7.85e-11
ENSG00000119703	ZC2HC1C	-1.72322	5.9e-06
ENSG00000119705	SLIRP	1.17286	2.57e-42
ENSG00000119714	GPR68	2.01917	0.000273875
ENSG00000119725	ZNF410	1.60347	0.000769718
ENSG00000119737	GPR75	1.35153	4.74e-07
ENSG00000119760	SUPT7L	-1.31931	5.45e-51
ENSG00000119771	KLHL29	-1.4084	4.15e-12
ENSG00000119772	DNMT3A	-1.38085	1.05e-24
ENSG00000119777	TMEM214	-1.05909	3.17e-39
ENSG00000119778	ATAD2B	-1.12856	1.56e-18
ENSG00000119812	FAM98A	-1.24665	8.22e-38
ENSG00000119844	AFTPH	1.51955	4.65e-87
ENSG00000119862	LGALSL	1.72484	5.07e-59
ENSG00000119878	CRIPT	-1.15047	7.38e-22
ENSG00000119912	IDE	-1.14494	8.36e-41
ENSG00000119915	ELOVL3	6.34864	0
ENSG00000119917	IFIT3	7.54372	2.33e-200
ENSG00000119922	IFIT2	11.0708	0
ENSG00000119927	GPAM	-1.54252	8.56e-28
ENSG00000119929	CUTC	-2.27116	4.6e-66
ENSG00000119938	PPP1R3C	-1.35998	1.74e-13
ENSG00000119946	CNNM1	-1.79623	2.85e-66
ENSG00000120029	ARMH3	-1.27762	7.12e-28
ENSG00000120053	GOT1	-1.25202	1.21e-32
ENSG00000120063	GNA13	1.52977	7.19e-96
ENSG00000120068	HOXB8	2.79708	1.48e-222
ENSG00000120075	HOXB5	1.4934	9.09e-40
ENSG00000120093	HOXB3	1.97453	8.08e-99
ENSG00000120149	MSX2	1.09503	6.31e-07
ENSG00000120156	TEK	6.92641	4.12e-67
ENSG00000120158	RCL1	-1.47665	2.71e-35
ENSG00000120211	INSL4	1.54707	6.35e-97
ENSG00000120217	CD274	6.68566	0
ENSG00000120306	CYSTM1	1.6083	3.71e-98
ENSG00000120314	WDR55	-1.0444	1.55e-29
ENSG00000120327	PCDHB14	1.32795	0.0266662
ENSG00000120332	TNN	8.17	4.07e-34
ENSG00000120341	SEC16B	2.04253	0.00496473
ENSG00000120438	TCP1	1.53589	3.5e-109
ENSG00000120471	TP53AIP1	3.56562	4.21e-05
ENSG00000120509	PDZD11	1.1248	7.55e-40
ENSG00000120533	ENY2	1.40967	1.5e-75
ENSG00000120549	KIAA1217	1.56779	4.38e-30
ENSG00000120616	EPC1	1.65275	1.79e-57
ENSG00000120658	ENOX1	1.2748	0.0142774
ENSG00000120662	MTRF1	-1.24862	1.26e-13
ENSG00000120675	DNAJC15	1.79919	0.00537487
ENSG00000120685	PROSER1	1.16104	3.25e-35
ENSG00000120694	HSPH1	2.89777	4.21e-207
ENSG00000120697	ALG5	1.07833	1.97e-30
ENSG00000120705	ETF1	1.42225	3.42e-55
ENSG00000120738	EGR1	4.81039	1.16e-175
ENSG00000120784	ZFP30	2.12081	1.02e-49
ENSG00000120820	GLT8D2	3.31777	0.000123205
ENSG00000120832	MTERF2	-2.30832	6.19e-37
ENSG00000120868	APAF1	1.5907	6.57e-26
ENSG00000120910	PPP3CC	-1.30281	2.32e-14
ENSG00000120942	UBIAD1	-1.62324	4e-36
ENSG00000121057	AKAP1	-1.16613	1.3e-47
ENSG00000121060	TRIM25	1.78198	3.34e-129
ENSG00000121064	SCPEP1	1.53085	2.23e-84
ENSG00000121073	SLC35B1	1.35227	2.88e-69
ENSG00000121075	TBX4	-1.64745	0.0366122
ENSG00000121089	NACA3P	1.32255	2.43e-09
ENSG00000121104	FAM117A	-1.38309	4.38e-07
ENSG00000121274	TENT4B	2.23434	1.06e-131
ENSG00000121297	TSHZ3	-1.03495	4.13e-07
ENSG00000121316	PLBD1	1.51015	1.14e-15
ENSG00000121380	BCL2L14	2.89137	0.000713703
ENSG00000121413	ZSCAN18	-1.29153	0.00023811
ENSG00000121417	ZNF211	2.17515	1.18e-87
ENSG00000121542	SEC22A	-1.47489	5.68e-16
ENSG00000121552	CSTA	2.67014	1.55e-13
ENSG00000121577	POPDC2	3.93088	5.25e-15
ENSG00000121621	KIF18A	-1.35373	1.12e-31
ENSG00000121653	MAPK8IP1	-1.43072	1.66e-14
ENSG00000121671	CRY2	-2.0809	4.24e-27
ENSG00000121680	PEX16	-1.58572	7.03e-19
ENSG00000121690	DEPDC7	1.92955	1.01e-47
ENSG00000121716	PILRB	-1.45023	2.55e-25
ENSG00000121743	GJA3	-2.57926	0.0184717
ENSG00000121766	ZCCHC17	-1.71206	1.06e-29
ENSG00000121858	TNFSF10	7.96052	0
ENSG00000121897	LIAS	-1.15099	1.34e-10
ENSG00000121966	CXCR4	6.75748	4.7e-127
ENSG00000121989	ACVR2A	1.78629	2.11e-18
ENSG00000122008	POLK	-1.08132	9.28e-18
ENSG00000122026	RPL21	1.57735	1.39e-27
ENSG00000122034	GTF3A	1.17036	9.22e-49
ENSG00000122035	RASL11A	4.88166	6.64e-54
ENSG00000122068	FYTTD1	1.19557	1.49e-37
ENSG00000122085	MTERF4	-1.15927	1.99e-23
ENSG00000122224	LY9	-2.13981	0.0168683
ENSG00000122257	RBBP6	3.09881	0
ENSG00000122335	SERAC1	-1.5583	1.21e-15
ENSG00000122376	SHLD2	-1.4375	8.85e-45
ENSG00000122406	RPL5	1.44781	7.29e-98
ENSG00000122432	SPATA1	2.69293	3.31e-10
ENSG00000122477	LRRC39	1.45138	0.00851091
ENSG00000122490	PQLC1	-1.12406	1.03e-15
ENSG00000122497	NA	2.03727	9.23e-45
ENSG00000122507	BBS9	-1.47199	5.05e-18
ENSG00000122512	PMS2	-1.18405	3.08e-16
ENSG00000122547	EEPD1	-2.83237	3.02e-54
ENSG00000122557	HERPUD2	-1.26509	7.76e-26
ENSG00000122574	WIPF3	-1.25946	0.0475746
ENSG00000122592	HOXA7	1.59388	1.88e-26
ENSG00000122641	INHBA	5.18263	2.1e-24
ENSG00000122642	FKBP9	1.20197	3.39e-16
ENSG00000122643	NT5C3A	3.3849	4.57e-72
ENSG00000122678	POLM	-1.98286	9.28e-30
ENSG00000122691	TWIST1	-1.24811	0.00446013
ENSG00000122729	ACO1	-2.16413	2.96e-108
ENSG00000122741	DCAF10	-1.03945	3.37e-11
ENSG00000122778	KIAA1549	-1.19009	6.46e-36
ENSG00000122783	CYREN	-1.72372	3.18e-60
ENSG00000122786	CALD1	1.00681	9.04e-45
ENSG00000122861	PLAU	2.14906	1.48e-60
ENSG00000122862	SRGN	2.05966	7.37e-41
ENSG00000122863	CHST3	-1.15931	5.34e-29
ENSG00000122877	EGR2	5.16067	1.11e-27
ENSG00000122882	ECD	-1.30207	2.19e-33
ENSG00000122912	SLC25A16	-1.10265	6.11e-13
ENSG00000122966	CIT	-1.88034	5.11e-64
ENSG00000122970	IFT81	-1.22085	2.54e-32
ENSG00000122986	HVCN1	2.62455	6.82e-34
ENSG00000123009	NME2P1	1.65619	1.39e-41
ENSG00000123064	DDX54	-1.09495	1.09e-41
ENSG00000123066	MED13L	-1.06122	1.23e-12
ENSG00000123080	CDKN2C	2.1144	2.53e-123
ENSG00000123096	SSPN	1.04279	0.047686
ENSG00000123131	PRDX4	2.022	8.27e-77
ENSG00000123136	DDX39A	1.19475	8.01e-56
ENSG00000123146	ADGRE5	-1.13312	6.22e-32
ENSG00000123154	WDR83	-1.13656	1.38e-08
ENSG00000123159	GIPC1	-1.45999	2.03e-66
ENSG00000123178	SPRYD7	-1.09552	5.02e-11
ENSG00000123191	ATP7B	-1.38046	6.8e-15
ENSG00000123213	NLN	-1.46965	1.26e-73
ENSG00000123240	OPTN	1.29422	1.87e-28
ENSG00000123329	ARHGAP9	2.37343	0.00904276
ENSG00000123342	MMP19	5.18227	3.47e-09
ENSG00000123349	PFDN5	1.48044	2.99e-97
ENSG00000123352	SPATS2	-1.33731	3.03e-54
ENSG00000123358	NR4A1	1.20205	3.07e-46
ENSG00000123360	PDE1B	8.1461	3.98e-26
ENSG00000123364	HOXC13	1.41499	1.67e-25
ENSG00000123395	ATG101	-1.08947	1.75e-32
ENSG00000123411	IKZF4	1.90671	1.63e-37
ENSG00000123562	MORF4L2	1.9965	6.27e-184
ENSG00000123600	METTL8	-1.67343	7.13e-36
ENSG00000123607	TTC21B	-1.11157	3.13e-19
ENSG00000123609	NMI	1.82901	1.97e-22
ENSG00000123610	TNFAIP6	1.57109	2.07e-07
ENSG00000123612	ACVR1C	4.70361	1.03e-25
ENSG00000123689	G0S2	1.18246	0.00412496
ENSG00000123815	COQ8B	-1.1305	2.68e-36
ENSG00000123838	C4BPA	1.02634	4.34e-07
ENSG00000123892	RAB38	-1.8765	4.82e-05
ENSG00000123901	GPR83	5.662	1.26e-49
ENSG00000123933	MXD4	-1.17851	1.49e-34
ENSG00000124006	OBSL1	-1.12408	8.6e-31
ENSG00000124067	SLC12A4	-1.60933	5.62e-47
ENSG00000124092	CTCFL	5.42558	1.69e-06
ENSG00000124102	PI3	3.50332	4.33e-05
ENSG00000124103	FAM209A	1.6932	0.000483759
ENSG00000124104	SNX21	-1.93014	1.12e-21
ENSG00000124107	SLPI	2.59052	4.64e-28
ENSG00000124120	TTPAL	-1.6996	1.52e-38
ENSG00000124140	SLC12A5	1.46527	2.21e-08
ENSG00000124145	SDC4	3.21928	7.12e-85
ENSG00000124151	NCOA3	-1.51464	2.04e-26
ENSG00000124155	PIGT	1.27116	4.33e-46
ENSG00000124159	MATN4	5.87893	5.43e-47
ENSG00000124171	PARD6B	1.49089	6.68e-28
ENSG00000124172	ATP5F1E	1.86293	1.74e-150
ENSG00000124181	PLCG1	-1.55771	1.31e-70
ENSG00000124191	TOX2	-3.27418	8.68e-34
ENSG00000124201	ZNFX1	2.4602	8.96e-229
ENSG00000124205	EDN3	-2.55731	0.00258761
ENSG00000124207	CSE1L	-1.11693	4.15e-50
ENSG00000124209	RAB22A	1.06552	3.05e-34
ENSG00000124212	PTGIS	6.1018	4.93e-29
ENSG00000124216	SNAI1	3.37816	5.47e-128
ENSG00000124217	MOCS3	-1.42723	1.3e-18
ENSG00000124224	PPP4R1L	1.10819	2.44e-12
ENSG00000124225	PMEPA1	-1.1575	5.19e-51
ENSG00000124228	DDX27	-1.67724	3.86e-78
ENSG00000124249	KCNK15	1.61907	0.0118573
ENSG00000124253	PCK1	2.57161	0.0383512
ENSG00000124256	ZBP1	10.1658	3.67e-103
ENSG00000124257	NEURL2	-1.53364	0.000531315
ENSG00000124275	MTRR	-1.03979	8.76e-23
ENSG00000124357	NAGK	-1.06996	7.67e-26
ENSG00000124374	PAIP2B	-1.80204	7.19e-09
ENSG00000124383	MPHOSPH10	1.31864	5.13e-57
ENSG00000124391	IL17C	6.27403	3.74e-07
ENSG00000124444	ZNF576	-1.9001	1.46e-20
ENSG00000124466	LYPD3	6.02057	3.99e-202
ENSG00000124507	PACSIN1	-2.80513	3.37e-09
ENSG00000124541	RRP36	-1.17887	1.65e-26
ENSG00000124562	SNRPC	1.61699	1.4e-74
ENSG00000124568	SLC17A1	-1.35831	0.00384074
ENSG00000124574	ABCC10	-1.93444	1.38e-33
ENSG00000124593	ENSG00000124593	-1.68299	4.53e-30
ENSG00000124602	UNC5CL	-1.45609	3e-07
ENSG00000124614	RPS10	1.27746	4.32e-09
ENSG00000124615	MOCS1	-1.98992	1.72e-10
ENSG00000124641	MED20	-1.62735	1.87e-26
ENSG00000124664	SPDEF	-2.85672	1.67e-125
ENSG00000124713	GNMT	1.47191	0.0428528
ENSG00000124743	KLHL31	1.57379	0.000163184
ENSG00000124762	CDKN1A	3.9371	0
ENSG00000124784	RIOK1	1.1202	4.12e-14
ENSG00000124787	RPP40	-2.13665	4.84e-22
ENSG00000124788	ATXN1	-1.60798	9.66e-34
ENSG00000124789	NUP153	1.30394	3.08e-64
ENSG00000124813	RUNX2	1.43181	0.0018123
ENSG00000124839	RAB17	-2.56473	9.69e-05
ENSG00000124882	EREG	5.00588	1.29e-179
ENSG00000125037	EMC3	1.1766	1.72e-25
ENSG00000125122	LRRC29	-1.87064	0.000459749
ENSG00000125148	MT2A	3.04299	2.58e-94
ENSG00000125266	EFNB2	4.25022	4.41e-125
ENSG00000125304	TM9SF2	1.06838	4.81e-38
ENSG00000125319	C17orf53	-1.34854	5.2e-11
ENSG00000125347	IRF1	3.62027	0
ENSG00000125351	UPF3B	-1.24899	3.64e-20
ENSG00000125356	NDUFA1	2.13793	6.77e-190
ENSG00000125384	PTGER2	-2.51438	9.04e-09
ENSG00000125386	FAM193A	-1.05915	3.62e-15
ENSG00000125398	SOX9	2.49598	4.98e-224
ENSG00000125409	TEKT3	2.03219	0.00494189
ENSG00000125430	HS3ST3B1	1.97209	1.04e-08
ENSG00000125434	SLC25A35	-1.14194	1.35e-11
ENSG00000125447	GGA3	-1.56533	1.46e-52
ENSG00000125449	ARMC7	-1.98932	3.74e-37
ENSG00000125450	NUP85	-1.33965	2.64e-54
ENSG00000125454	SLC25A19	-1.14782	8.7e-11
ENSG00000125458	NT5C	-1.02067	3.18e-24
ENSG00000125459	MSTO1	-1.60574	1.52e-27
ENSG00000125484	GTF3C4	2.54365	0
ENSG00000125508	SRMS	9.01907	3.12e-23
ENSG00000125510	OPRL1	-1.00546	0.000205609
ENSG00000125534	PPDPF	1.41	7.19e-20
ENSG00000125618	PAX8	-3.01465	2.72e-06
ENSG00000125630	POLR1B	1.15155	5.27e-41
ENSG00000125637	PSD4	-2.16271	2.25e-45
ENSG00000125703	ATG4C	-1.66818	5.43e-17
ENSG00000125730	C3	1.76515	2.35e-115
ENSG00000125731	SH2D3A	-2.39444	1.34e-33
ENSG00000125735	TNFSF14	4.79931	2.79e-129
ENSG00000125740	FOSB	6.06317	5.89e-71
ENSG00000125741	OPA3	-1.678	8.12e-66
ENSG00000125743	SNRPD2	1.56249	2.77e-111
ENSG00000125753	VASP	-1.94551	8.74e-123
ENSG00000125775	SDCBP2	1.55504	0.00170237
ENSG00000125780	TGM3	1.08863	0.0493719
ENSG00000125787	GNRH2	5.40213	7.61e-70
ENSG00000125817	CENPB	-1.08648	3.07e-45
ENSG00000125843	AP5S1	-1.18419	7.66e-15
ENSG00000125848	FLRT3	2.07856	4.5e-147
ENSG00000125868	DSTN	1.18194	2.03e-44
ENSG00000125869	LAMP5	1.98499	8.14e-05
ENSG00000125875	TBC1D20	-1.12716	1.7e-40
ENSG00000125885	MCM8	-1.01797	3.08e-27
ENSG00000125898	FAM110A	-2.27058	8.87e-23
ENSG00000125901	MRPS26	-1.01135	8.86e-24
ENSG00000125931	CITED1	1.88306	0.00376448
ENSG00000125952	MAX	1.28421	3.44e-50
ENSG00000125962	ARMCX5	-1.76363	4.21e-20
ENSG00000125967	NECAB3	-1.72735	1.12e-34
ENSG00000125991	ERGIC3	1.12483	9.95e-59
ENSG00000125995	ROMO1	1.692	6.43e-103
ENSG00000126001	CEP250	-1.50784	9.16e-41
ENSG00000126005	MMP24OS	1.38731	7.56e-48
ENSG00000126107	HECTD3	-1.45216	1.05e-34
ENSG00000126214	KLC1	-1.7134	9.32e-41
ENSG00000126215	XRCC3	-1.52746	5.21e-40
ENSG00000126216	TUBGCP3	-1.37923	4.16e-25
ENSG00000126217	MCF2L	-3.21487	1.48e-38
ENSG00000126218	F10	1.27126	0.0147257
ENSG00000126243	LRFN3	-1.96197	3.48e-50
ENSG00000126259	KIRREL2	1.0029	0.0167901
ENSG00000126267	COX6B1	1.53879	2.64e-65
ENSG00000126368	NR1D1	1.99873	4.58e-75
ENSG00000126391	FRMD8	-1.97289	1.36e-78
ENSG00000126464	PRR12	-1.34439	5.88e-43
ENSG00000126500	FLRT1	1.73137	0.000876246
ENSG00000126524	SBDS	1.04422	5.74e-35
ENSG00000126562	WNK4	1.10538	1.5e-18
ENSG00000126583	PRKCG	1.83383	2.06e-35
ENSG00000126705	AHDC1	-1.64588	8.34e-27
ENSG00000126709	IFI6	8.32785	6.38e-252
ENSG00000126749	ENSG00000126749	-1.1117	2.82e-20
ENSG00000126756	UXT	1.18382	1.5e-26
ENSG00000126759	CFP	3.0527	1.2e-26
ENSG00000126767	ELK1	-1.2126	4.69e-29
ENSG00000126775	ATG14	-1.153	1.31e-18
ENSG00000126778	SIX1	1.18226	3.01e-18
ENSG00000126787	DLGAP5	-2.48514	3.89e-116
ENSG00000126803	HSPA2	-1.26726	8.81e-33
ENSG00000126822	PLEKHG3	-1.87078	1.97e-57
ENSG00000126870	WDR60	-1.77242	5.27e-35
ENSG00000126882	FAM78A	-1.95658	2.28e-15
[truncated: 6,186 more rows]

## Sheet: DE_shHNRNPK
ensembl_gene_id	hgnc_symbol	log2FoldChange	pval
ENSG00000228463	AP006222.2	1.40104	0.0143764
ENSG00000225972	MTND1P23	1.07068	9e-05
ENSG00000187634	SAMD11	-1.80348	1.24e-35
ENSG00000187608	ISG15	1.47813	5.52e-08
ENSG00000230415	RP5-902P8.10	1.32699	0.00815996
ENSG00000268575	RP1-283E3.8	-1.1231	0.00204832
ENSG00000187730	GABRD	1.36278	0.000579
ENSG00000182873	RP11-181G12.2	2.26251	5.08e-11
ENSG00000269896	RP4-740C4.6	-2.73218	1.12e-05
ENSG00000142611	PRDM16	1.35693	0.0174987
ENSG00000162591	MEGF6	-2.09334	5.55e-23
ENSG00000116254	CHD5	-1.03316	0.024919
ENSG00000187017	ESPN	2.96832	0.0020409
ENSG00000049249	TNFRSF9	3.27177	0.00156907
ENSG00000230679	ENO1-AS1	1.2158	0.0299324
ENSG00000232208	RP3-477M7.5	-2.19887	0.00256488
ENSG00000049239	H6PD	-1.40957	1.05e-34
ENSG00000178585	CTNNBIP1	-1.01013	5.67e-11
ENSG00000009724	MASP2	2.51699	0.00351571
ENSG00000271895	RP4-635E18.8	1.27735	2.65e-05
ENSG00000116661	FBXO2	1.33954	1.28e-05
ENSG00000242349	NPPA-AS1	1.37481	0.00848583
ENSG00000028137	TNFRSF1B	2.9769	0.00220042
ENSG00000162460	TMEM82	3.64144	0.000151
ENSG00000117115	PADI2	-1.07547	5.05e-05
ENSG00000142623	PADI1	-1.45247	1.63e-05
ENSG00000162543	UBXN10	4.39472	0.0489479
ENSG00000158825	CDA	-2.22579	1.11e-31
ENSG00000117298	ECE1	-1.42779	3.9e-27
ENSG00000231105	RP5-1071N3.1	-1.47266	0.00397054
ENSG00000142798	HSPG2	1.3212	2.18e-36
ENSG00000228397	RP1-224A6.3	3.54358	9.38e-05
ENSG00000133216	EPHB2	-1.99383	2.98e-64
ENSG00000272796	RP1-74M1.3	-3.5941	5.01e-56
ENSG00000235052	RP1-150O5.3	2.67663	1.7e-07
ENSG00000117305	HMGCL	1.8861	3.9e-15
ENSG00000142661	MYOM3	-2.71172	1.34e-10
ENSG00000142675	CNKSR1	1.36831	0.0141896
ENSG00000260063	RP5-968P14.2	1.0859	0.0348033
ENSG00000158246	FAM46B	1.77386	0.000261
ENSG00000186501	TMEM222	-1.0571	1.51e-07
ENSG00000126709	IFI6	1.84832	0.00171211
ENSG00000270605	RP5-1092A3.4	1.58181	3.43e-12
ENSG00000130766	SESN2	1.17111	1.09e-18
ENSG00000180198	RCC1	-1.04687	4.61e-22
ENSG00000200087	SNORA73B	2.06981	1.7e-07
ENSG00000188060	RAB42	-1.93571	0.00706547
ENSG00000134668	SPOCD1	1.58589	0.00424076
ENSG00000224066	RP4-622L5.7	1.16317	0.0360962
ENSG00000160055	TMEM234	1.41873	2.18e-17
ENSG00000162520	SYNC	-1.20658	5.68e-10
ENSG00000116885	OSCP1	-1.3606	2.32e-08
ENSG00000196449	YRDC	1.00442	1.06e-13
ENSG00000158315	RHBDL2	1.47317	0.00054
ENSG00000116983	HPCAL4	1.55	0.0486441
ENSG00000116985	BMP8B	-1.06386	1.03e-13
ENSG00000168389	MFSD2A	1.03498	1.49e-06
ENSG00000117013	KCNQ4	1.11869	0.0344676
ENSG00000204060	FOXO6	-1.25893	0.00555453
ENSG00000127129	EDN2	-1.25072	0.02514
ENSG00000164010	ERMAP	-1.43521	3.68e-19
ENSG00000228192	RP11-342M1.3	1.27685	0.0251792
ENSG00000234694	RP1-92O14.3	1.74532	0.000582
ENSG00000178922	HYI	-2.09458	0.00035
ENSG00000236200	KDM4A-AS1	-1.1598	0.0163839
ENSG00000159588	CCDC17	1.52476	6.92e-08
ENSG00000117480	FAAH	1.90875	0.0100039
ENSG00000162366	PDZK1IP1	-2.55585	1.52e-23
ENSG00000117834	SLC5A9	1.96083	0.0260765
ENSG00000142700	DMRTA2	3.39895	0.0195657
ENSG00000169213	RAB3B	-1.06545	6.24e-14
ENSG00000203985	LDLRAD1	3.17922	0.00597491
ENSG00000116133	DHCR24	1.07893	6.96e-07
ENSG00000143001	TMEM61	1.54087	0.0158546
ENSG00000132854	KANK4	-2.182	0.000976
ENSG00000162607	USP1	-1.00774	1.04e-15
ENSG00000185483	ROR1	-2.05275	5.86e-26
ENSG00000116704	SLC35D1	1.14991	0.00108132
ENSG00000162594	IL23R	7.79761	1.17e-06
ENSG00000232284	GNG12-AS1	-2.31652	0.00477976
ENSG00000116761	CTH	1.28381	1.22e-05
ENSG00000259030	FPGT-TNNI3K	1.35774	0.0247746
ENSG00000162624	LHX8	-1.67124	0.0269166
ENSG00000137955	RABGGTB	1.34947	1.98e-21
ENSG00000154027	AK5	-3.12176	1.1e-30
ENSG00000117114	LPHN2	-1.73129	0.00614084
ENSG00000065243	PKN2	-1.09187	6.41e-14
ENSG00000117226	GBP3	2.16758	0.0200559
ENSG00000162645	GBP2	2.07548	0.0136866
ENSG00000171488	LRRC8C	-1.21885	2.51e-12
ENSG00000251795	SNORA66	1.02748	0.0243517
ENSG00000230439	RP11-488P3.1	-1.52832	0.0399884
ENSG00000224081	LINC01057	1.10682	0.00486245
ENSG00000156869	FRRS1	1.21887	4.22e-08
ENSG00000228084	RP5-884G6.2	1.6333	0.000329
ENSG00000060718	COL11A1	-8.82269	1.46e-82
ENSG00000143126	CELSR2	-1.63307	3.23e-44
ENSG00000198758	EPS8L3	1.03723	0.0334603
ENSG00000258673	RP4-773N10.6	2.64848	0.00514083
ENSG00000227963	RP5-1074L1.1	-1.33506	0.0263635
ENSG00000085465	OVGP1	1.12451	3.94e-07
ENSG00000236480	PKMP1	1.2049	1.63e-07
ENSG00000134198	TSPAN2	-2.78439	8.18e-10
ENSG00000273131	RP6-42F4.1	1.38107	5.88e-07
ENSG00000171943	SRGAP2C	-1.00161	0.000417
ENSG00000203849	RP11-417J8.6	2.18803	1.43e-05
ENSG00000225015	SNX18P15	1.35148	0.0178869
ENSG00000232274	RP11-782C8.2	1.20861	7.27e-05
ENSG00000236943	RP11-640M9.1	2.31571	0.00077
ENSG00000117289	TXNIP	1.48488	0.0158381
ENSG00000211451	GNRHR2	-1.27045	0.0470944
ENSG00000225603	RP11-325P15.1	-1.88817	0.0360595
ENSG00000231196	RP11-495P10.8	2.97662	0.000974
ENSG00000143369	ECM1	1.04662	0.00139546
ENSG00000237781	RP11-54A4.2	2.57333	0.00284794
ENSG00000143412	ANXA9	1.21268	2.77e-10
ENSG00000143434	SEMA6C	1.31841	2.22e-05
ENSG00000143375	CGN	2.16649	0.00029
ENSG00000249602	RP11-98D18.3	1.4432	9.8e-05
ENSG00000237975	FLG-AS1	2.00316	3e-06
ENSG00000188015	S100A3	-1.33607	1.57e-16
ENSG00000143554	SLC27A3	1.79055	1.68e-06
ENSG00000169241	SLC50A1	1.34627	1.95e-09
ENSG00000173080	RXFP4	1.98523	0.022649
ENSG00000273002	RP11-336K24.12	2.14312	0.00375833
ENSG00000160781	PAQR6	-1.53911	4.61e-22
ENSG00000198715	C1orf85	1.09566	1.1e-21
ENSG00000163467	TSACC	1.2983	0.000482
ENSG00000125462	C1orf61	1.04271	5.39e-06
ENSG00000236947	RP11-98G7.1	1.00171	0.0224553
ENSG00000163382	APOA1BP	1.02381	1.77e-21
ENSG00000132688	NES	1.93772	2.75e-30
ENSG00000027869	SH2D2A	1.38028	2.21e-06
ENSG00000198400	NTRK1	2.75419	0.000203
ENSG00000187800	PEAR1	-1.77663	3.23e-07
ENSG00000183853	KIRREL	-1.26707	3.74e-30
ENSG00000213085	CCDC19	1.22684	0.0279648
ENSG00000085552	IGSF9	1.10497	0.030664
ENSG00000224259	LINC01133	3.51535	2.84e-11
ENSG00000122224	LY9	1.35431	0.030985
ENSG00000158769	F11R	1.00184	8.92e-05
ENSG00000143217	PVRL4	-1.36919	0.00757979
ENSG00000162755	KLHDC9	-1.20624	0.000672
ENSG00000158887	MPZ	1.36263	0.00349314
ENSG00000173110	HSPA6	2.06641	0.000109
ENSG00000143248	RGS5	1.18803	0.00475922
ENSG00000269887	RP11-477H21.2	-1.86915	0.0042589
ENSG00000143147	GPR161	-1.21632	1.76e-12
ENSG00000143178	TBX19	1.09298	1.08e-07
ENSG00000188404	SELL	2.74209	0.00699944
ENSG00000076258	FMO4	1.34692	0.000621
ENSG00000203739	RP11-296O14.3	1.23463	0.00327385
ENSG00000270084	GAS5-AS1	-1.82939	0.000612
ENSG00000234741	GAS5	1.29445	9.53e-32
ENSG00000208317	SNORD78	1.65062	1.6e-06
ENSG00000120341	SEC16B	2.59184	0.000357
ENSG00000213057	C1orf220	2.24217	0.000834
ENSG00000273384	RP5-1098D14.1	2.85156	0.01119
ENSG00000273062	RP11-428K3.1	3.90263	6.96e-05
ENSG00000121454	LHX4	-1.22288	4.41e-09
ENSG00000143333	RGS16	1.95395	1.23e-05
ENSG00000058085	LAMC2	-1.40435	2.22e-21
ENSG00000116701	NCF2	-3.60612	2.03e-15
ENSG00000143344	RGL1	-1.09143	7.03e-08
ENSG00000135842	FAM129A	1.09398	3.57e-05
ENSG00000116679	IVNS1ABP	-1.54219	6.87e-23
ENSG00000273129	RP5-973M2.2	-1.26829	0.0495512
ENSG00000116785	CFHR3	1.01605	0.00412675
ENSG00000244414	CFHR1	1.25907	0.000354
ENSG00000235748	RP11-32D17.4	1.22993	0.0327571
ENSG00000134376	CRB1	2.66352	0.0014723
ENSG00000134369	NAV1	-1.42571	2.13e-25
ENSG00000223774	RP11-307B6.3	1.59614	6.41e-05
ENSG00000133067	LGR6	-1.3835	0.000223
ENSG00000228288	PCAT6	1.08669	3.76e-06
ENSG00000233791	LINC01136	3.72933	5.03e-06
ENSG00000257315	ZBED6	-2.2695	6.49e-20
ENSG00000170498	KISS1	2.88011	0.000646
ENSG00000240219	RP11-430C7.5	2.10787	0.00208039
ENSG00000163531	NFASC	2.3916	2.44e-14
ENSG00000162873	KLHDC8A	1.02888	0.0358317
ENSG00000162894	FAIM3	-2.19337	0.000259
ENSG00000123838	C4BPA	1.98897	2.08e-31
ENSG00000196352	CD55	1.06727	3.42e-23
ENSG00000196878	LAMB3	1.1303	0.00144374
ENSG00000203706	SERTAD4-AS1	-1.1533	0.0060843
ENSG00000082497	SERTAD4	-1.92981	6.46e-07
ENSG00000143473	KCNH1	-5.85042	1.81e-21
ENSG00000153363	LINC00467	1.02488	0.00923314
ENSG00000162772	ATF3	1.72448	0.000398
ENSG00000123685	BATF3	-1.77325	1.01e-17
ENSG00000143494	VASH2	-1.0732	1.8e-10
ENSG00000092969	TGFB2	-1.41158	1.68e-12
ENSG00000136630	HLX	-1.51251	8.89e-06
ENSG00000143512	HHIPL2	1.23304	0.000906
ENSG00000225265	RP11-378J18.3	-1.35055	0.00189014
ENSG00000187554	TLR5	1.00178	0.0441569
ENSG00000143786	CNIH3	1.45567	0.00929587
ENSG00000143816	WNT9A	-1.55454	1.68e-09
ENSG00000154342	WNT3A	4.79154	9.98e-06
ENSG00000203684	IBA57-AS1	1.84554	0.0205189
ENSG00000183929	DUSP5P1	-1.26881	0.00205176
ENSG00000226920	RP5-1068B5.3	1.1517	0.00619362
ENSG00000183780	SLC35F3	-1.21322	3.94e-15
ENSG00000168243	GNG4	-1.33912	3.51e-17
ENSG00000116962	NID1	-1.24808	0.000329
ENSG00000186197	EDARADD	-1.23744	4.56e-09
ENSG00000155816	FMN2	-1.52319	2.85e-15
ENSG00000117009	KMO	2.73864	0.00224239
ENSG00000054277	OPN3	1.69937	0.0065157
ENSG00000197769	MAP1LC3C	1.78117	0.00705271
ENSG00000180287	PLD5	-1.62603	3.9e-16
ENSG00000253326	RP11-261C10.7	1.29409	0.00034
ENSG00000117020	AKT3	-1.1709	3.25e-24
ENSG00000272195	RP11-156E8.1	1.28779	0.00755276
ENSG00000260698	RP11-439E19.9	2.41002	0.000349
ENSG00000227953	RP11-439E19.3	1.10914	0.0353151
ENSG00000232694	XX-CR54.3	3.6154	0.0373692
ENSG00000171163	ZNF692	1.17823	1.36e-24
ENSG00000151240	DIP2C	-1.05358	1.11e-15
ENSG00000229869	RP11-363N22.2	2.8281	0.0242846
ENSG00000224034	RP11-445P17.8	-1.57145	8.64e-06
ENSG00000178462	TUBAL3	2.66716	1.26e-31
ENSG00000170525	PFKFB3	-1.16622	2.75e-29
ENSG00000238266	LINC00707	-2.92368	1.39e-56
ENSG00000183049	CAMK1D	-1.50161	4.36e-08
ENSG00000107611	CUBN	1.69104	0.00339527
ENSG00000165995	CACNB2	2.81313	0.00203574
ENSG00000231920	NEBL-AS1	1.10911	0.027025
ENSG00000150054	MPP7	1.44404	0.00187945
ENSG00000148513	ANKRD30A	-1.78824	0.00015
ENSG00000165731	RET	-2.03623	0.000452
ENSG00000273008	RP11-351D16.3	1.30198	0.000433
ENSG00000165507	C10orf10	1.76809	0.0013532
ENSG00000231187	RP11-38L15.3	1.07983	0.00108793
ENSG00000204176	SYT15	-1.23112	2.54e-08
ENSG00000204174	NPY4R	-2.49597	7.46e-108
ENSG00000213412	HNRNPA1P33	-1.37558	1.92e-07
ENSG00000150165	ANXA8L1	-2.61964	2.59e-13
ENSG00000259942	RP11-292F22.7	-1.93571	7.62e-06
ENSG00000186807	ANXA8L2	-2.45194	1.77e-13
ENSG00000138293	NCOA4	1.16323	0.00483829
ENSG00000148584	A1CF	1.75371	9.41e-17
ENSG00000236671	PRKG1-AS1	-1.23729	3.97e-06
ENSG00000107984	DKK1	-1.30983	6.02e-36
ENSG00000231131	RP11-346D6.6	-5.06785	5.38e-93
ENSG00000165449	SLC16A9	1.9098	0.000401
ENSG00000138311	ZNF365	-3.24838	1.13e-10
ENSG00000272892	RP11-57G10.8	1.33084	0.0200182
ENSG00000122862	SRGN	1.66349	6.61e-31
ENSG00000197604	AC022532.1	2.32121	6.79e-08
ENSG00000107738	C10orf54	1.49106	1.51e-12
ENSG00000079393	DUSP13	2.62053	1.82e-11
ENSG00000156113	KCNMA1	-2.97912	3.89e-39
ENSG00000108179	PPIF	1.18615	2.73e-14
ENSG00000151224	MAT1A	3.23091	0.0101671
ENSG00000178217	SH2D4B	3.15587	0.0182181
ENSG00000229404	LINC00858	1.68891	3.27e-09
ENSG00000173269	MMRN2	2.01803	0.0162216
ENSG00000272734	ADIRF-AS1	1.05759	4.74e-05
ENSG00000148672	GLUD1	1.24372	7.27e-05
ENSG00000214562	NUTM2D	1.5143	0.0196549
ENSG00000227268	KLLN	1.23791	0.000248
ENSG00000185745	IFIT1	1.41343	7.49e-14
ENSG00000152779	SLC16A12	2.44866	0.00280369
ENSG00000232936	RP11-80H5.2	1.59247	0.00317946
ENSG00000228701	TNKS2-AS1	1.14669	0.0486954
ENSG00000186188	FFAR4	-1.09996	0.00353683
ENSG00000138185	ENTPD1	2.85326	0.00603076
ENSG00000165887	ANKRD2	1.37114	1.7e-05
ENSG00000120057	SFRP5	-2.21078	0.000579
ENSG00000138131	LOXL4	1.2407	1.46e-12
ENSG00000075891	PAX2	1.11604	0.00546145
ENSG00000107819	SFXN3	-1.0754	7.07e-20
ENSG00000120049	KCNIP2	1.08977	0.000216
ENSG00000119915	ELOVL3	2.7579	6.87e-09
ENSG00000138172	CALHM2	-3.66669	1.69e-19
ENSG00000065621	GSTO2	1.86308	0.000526
ENSG00000203497	PDCD4-AS1	1.33881	3.43e-08
ENSG00000150594	ADRA2A	-2.13398	0.0030527
ENSG00000233547	RP11-57H14.2	1.69326	0.0103552
ENSG00000169129	AFAP1L2	-1.62582	3.39e-38
ENSG00000151892	GFRA1	-3.63675	3.6e-49
ENSG00000165868	HSPA12A	-1.3612	1.22e-21
ENSG00000188316	ENO4	-1.84242	0.0413516
ENSG00000148704	VAX1	1.19642	0.0059894
ENSG00000165646	SLC18A2	3.65673	1.39e-06
ENSG00000198873	GRK5	-1.29632	4.99e-14
ENSG00000066468	FGFR2	-1.8389	5.9e-09
ENSG00000138152	BTBD16	1.0706	0.000968
ENSG00000229544	NKX1-2	2.50649	0.00955624
ENSG00000203780	FANK1	-1.63058	3.92e-06
ENSG00000180745	CLRN3	4.3556	0.0325813
ENSG00000068383	INPP5A	-1.33155	2.14e-08
ENSG00000148803	FUOM	1.13253	2.83e-08
ENSG00000214279	RP11-108K14.4	1.83626	1.27e-12
ENSG00000130649	CYP2E1	3.79668	1.4e-08
ENSG00000177951	BET1L	1.14726	3.61e-24
ENSG00000177963	RIC8A	1.00274	8.15e-21
ENSG00000254910	RP11-326C3.7	1.16542	1.02e-07
ENSG00000185885	IFITM1	-1.07769	0.0498434
ENSG00000185507	IRF7	1.84039	0.000538
ENSG00000255284	AP006621.5	-1.40657	1.18e-10
ENSG00000255142	AP006621.6	-2.10894	8.29e-05
ENSG00000177666	PNPLA2	1.04065	1.39e-05
ENSG00000250397	RP11-1391J7.1	-1.15939	0.0146411
ENSG00000198788	MUC2	-3.55099	8.12e-12
ENSG00000215182	MUC5AC	-4.01509	1.8e-75
ENSG00000117983	MUC5B	-2.2019	1.62e-65
ENSG00000184545	DUSP8	1.37011	1.21e-07
ENSG00000229512	AC068580.5	1.49439	0.0094312
ENSG00000053918	KCNQ1	-1.67168	7.95e-06
ENSG00000228661	AC090587.5	1.01803	0.0324685
ENSG00000213931	HBE1	4.38334	0.00708437
ENSG00000170955	PRKCDBP	-3.56328	1.05e-35
ENSG00000166311	SMPD1	1.20627	3.34e-20
ENSG00000110169	HPX	1.67246	0.00949662
ENSG00000166407	LMO1	-1.48423	0.000639
ENSG00000212607	SNORA45	1.74079	0.000298
ENSG00000184014	DENND5A	-1.14493	1.41e-23
ENSG00000148926	ADM	1.45792	2.17e-28
ENSG00000177112	MRVI1-AS1	2.82796	0.012365
ENSG00000247271	ZBED5-AS1	-1.46682	7.03e-22
ENSG00000110328	GALNT18	-1.53667	4.44e-11
ENSG00000133816	MICAL2	-1.93449	1.96e-57
ENSG00000189431	RASSF10	-2.78546	5.53e-49
ENSG00000175868	CALCB	3.13423	0.000167
ENSG00000166689	PLEKHA7	-1.04478	2.31e-16
ENSG00000272034	SNORD14A	1.49711	2.73e-10
ENSG00000260196	RP1-239B22.5	1.02863	0.000116
ENSG00000166833	NAV2	-1.74378	4.6e-06
ENSG00000245573	BDNF-AS	1.66877	0.0167203
ENSG00000184937	WT1	1.15838	5.67e-09
ENSG00000183242	WT1-AS	1.9157	1.03e-06
ENSG00000110427	KIAA1549L	-1.288	5.88e-07
ENSG00000135373	EHF	-1.06348	0.000146
ENSG00000110436	SLC1A2	1.84904	0.0270823
ENSG00000135362	PRR5L	-1.04974	8.68e-07
ENSG00000019505	SYT13	-3.95831	2.2e-167
ENSG00000254639	CTD-2589M5.5	1.84499	0.00249486
ENSG00000180210	F2	-1.09808	1.54e-07
ENSG00000134569	LRP4	-1.10941	1.52e-21
ENSG00000134571	MYBPC3	-2.57687	0.0242466
ENSG00000165917	RAPSN	1.92705	0.029492
ENSG00000255433	AP000479.1	-4.43967	2.87e-05
ENSG00000149131	SERPING1	3.44777	1.21e-09
ENSG00000254602	AP000662.4	2.09056	3.13e-09
ENSG00000166889	PATL1	-1.0029	4.47e-19
ENSG00000134827	TCN1	-1.32737	0.00535119
ENSG00000006118	TMEM132A	-1.1074	3.66e-08
ENSG00000013725	CD6	2.53773	0.0283004
ENSG00000167992	VWCE	1.11218	0.0253483
ENSG00000124915	RP11-467L20.10	-1.92957	4.93e-05
ENSG00000167995	BEST1	1.49645	0.0210106
ENSG00000255717	SNHG1	1.1742	4.12e-28
ENSG00000168004	HRASLS5	2.34326	6.52e-07
ENSG00000255651	RP11-466C23.4	5.403	0.00122021
ENSG00000256116	RP11-783K16.14	1.47259	0.00537613
ENSG00000168071	CCDC88B	1.36543	1.49e-20
ENSG00000181908	AP003774.4	2.67635	2.08e-05
ENSG00000168065	SLC22A11	1.31258	0.0289453
ENSG00000068831	RASGRP2	1.73624	1.1e-05
ENSG00000168070	C11orf85	2.12541	0.00297911
ENSG00000110025	SNX15	1.11499	0.0159359
ENSG00000197847	SLC22A20	-1.51345	0.000722
ENSG00000245532	NEAT1	1.09719	2.93e-07
ENSG00000173727	AP000769.1	1.08452	2.15e-06
ENSG00000173465	SSSCA1	1.0383	3.7e-15
ENSG00000172638	EFEMP2	4.66719	0.00991369
ENSG00000175115	PACS1	-1.34232	6.24e-35
ENSG00000173237	C11orf86	1.44934	0.0489274
ENSG00000006534	ALDH3B1	-2.12808	5.83e-92
ENSG00000255031	RP11-802E16.3	-3.19416	1.23e-62
ENSG00000260877	RP11-211G23.2	-1.01502	0.00107522
ENSG00000131620	ANO1	-2.8349	0.00515762
ENSG00000158483	FAM86C1	-1.2952	1.47e-09
ENSG00000110195	FOLR1	2.34019	9.79e-05
ENSG00000110237	ARHGEF17	-1.19746	4.07e-13
ENSG00000187726	DNAJB13	2.19748	3.83e-05
ENSG00000175564	UCP3	-1.80013	1.2e-06
ENSG00000149380	P4HA3	-1.84207	3.61e-23
ENSG00000165434	PGM2L1	-1.514	9.08e-22
ENSG00000175538	KCNE3	1.30747	0.0370966
ENSG00000241170	RP11-147I3.1	1.25355	0.0200182
ENSG00000207445	SNORD15B	1.65959	0.00286438
ENSG00000062282	DGAT2	1.48115	5.09e-15
ENSG00000204529	GUCY2EP	-1.25065	0.00457761
ENSG00000254761	RP11-672A2.1	-1.51903	0.00239208
ENSG00000254632	RP11-21L23.4	-1.20789	1.12e-05
ENSG00000261578	RP11-21L23.2	1.27215	0.000338
ENSG00000174804	FZD4	-1.2708	7.7e-09
ENSG00000165323	FAT3	-2.78325	4.15e-31
ENSG00000149212	SESN3	1.84262	4.34e-21
ENSG00000137672	TRPC6	-3.19613	8.37e-19
ENSG00000187240	DYNC2H1	-1.18435	3.62e-17
ENSG00000170290	SLN	-3.36151	3.51e-06
ENSG00000137714	FDX1	1.04811	4.47e-17
ENSG00000110777	POU2AF1	2.27582	0.040794
ENSG00000137707	BTG4	4.19717	0.00297322
ENSG00000204381	LAYN	-1.34985	0.000784
ENSG00000109846	CRYAB	-1.13632	0.0283004
ENSG00000197580	BCO2	1.26324	0.000481
ENSG00000250303	RP11-356J5.12	1.85984	0.00977765
ENSG00000177103	DSCAML1	-1.02887	5.97e-05
ENSG00000137726	FXYD6	-1.64171	2.32e-06
ENSG00000160588	MPZL3	2.57588	2.19e-10
ENSG00000149573	MPZL2	4.62205	0.00242306
ENSG00000255121	RP11-110I1.12	-1.03059	0.0274407
ENSG00000172367	PDZD3	1.62633	1.38e-06
ENSG00000076706	MCAM	-1.91705	1.39e-07
ENSG00000036672	USP2	1.36213	0.000706
ENSG00000154096	THY1	-1.85993	1.87e-05
ENSG00000137699	TRIM29	-1.21707	0.0437839
ENSG00000149403	GRIK4	2.66383	0.0128063
ENSG00000109927	TECTA	1.28041	0.0152262
ENSG00000109929	SC5D	1.39835	2.63e-15
ENSG00000200879	SNORD14E	2.44394	0.00592927
ENSG00000064199	SPA17	-1.87991	4.6e-24
ENSG00000255045	RP11-677M14.2	2.68962	0.00182404
ENSG00000149564	ESAM	-2.94104	1.2e-26
ENSG00000250073	RP11-677M14.3	-2.15545	0.0011774
ENSG00000154134	ROBO3	2.21218	7.3e-22
ENSG00000134955	SLC37A2	1.70574	0.00107494
ENSG00000203306	AP001007.1	1.81693	0.00927645
ENSG00000149557	FEZ1	1.24278	0.00210431
ENSG00000149571	KIRREL3	-6.34742	3.72e-124
ENSG00000151715	TMEM45B	2.15601	0.00432181
ENSG00000149418	ST14	1.59821	0.0339996
ENSG00000134917	ADAMTS8	-1.73238	0.00679839
ENSG00000010379	SLC6A13	2.70713	0.000183
ENSG00000177406	RP11-218M22.1	1.08001	6.26e-09
ENSG00000111186	WNT5B	-2.30114	3.1e-15
ENSG00000139190	VAMP1	1.78768	5.55e-55
ENSG00000184574	LPAR5	-1.87054	4.65e-07
ENSG00000139200	PIANP	-1.97443	1.8e-07
ENSG00000111674	ENO2	-1.12662	2.89e-23
ENSG00000173262	SLC2A14	1.22878	0.0281431
ENSG00000171847	FAM90A1	2.51104	2.19e-05
ENSG00000164845	FAM86FP	-2.03828	4.05e-16
ENSG00000226091	LINC00937	1.32892	0.00543313
ENSG00000256594	RP11-705C15.2	-1.02995	0.000175
ENSG00000139112	GABARAPL1	1.26093	1.37e-11
ENSG00000205809	KLRC2	3.48621	0.000179
ENSG00000060140	STYK1	2.78137	1.24e-15
ENSG00000180861	C12orf36	-2.00052	0.00559981
ENSG00000121316	PLBD1	1.33514	1.47e-05
ENSG00000111348	ARHGDIB	-1.52793	0.015958
ENSG00000134533	RERG	-2.11986	0.0043496
ENSG00000256238	RP11-473N11.2	-1.1035	2.67e-07
ENSG00000211455	STK38L	-1.22427	8.54e-06
ENSG00000029153	ARNTL2	-1.52754	5.48e-20
ENSG00000087494	PTHLH	-2.56033	1.56e-33
ENSG00000133704	IPO8	-1.23467	1.72e-27
ENSG00000018236	CNTN1	1.30262	8.27e-37
ENSG00000139174	PRICKLE1	-1.1604	7.77e-05
ENSG00000257261	RP11-96H19.1	-1.0381	0.0258767
ENSG00000179715	PCED1B	-1.01862	6.76e-20
ENSG00000247774	PCED1B-AS1	-2.08719	0.00830155
ENSG00000079337	RAPGEF3	1.32358	0.0463094
ENSG00000257660	RP11-579D7.4	2.74218	8.75e-11
ENSG00000169884	WNT10B	1.63432	1.12e-08
ENSG00000167588	GPD1	2.11775	0.00616531
ENSG00000050405	LIMA1	1.67969	0.00391286
ENSG00000185432	METTL7A	2.45429	6.34e-15
ENSG00000110934	BIN2	2.19736	5.35e-06
ENSG00000161835	GRASP	2.00607	2.28e-05
ENSG00000167767	KRT80	-1.01	4.7e-09
ENSG00000123405	NFE2	1.1183	0.027897
ENSG00000123338	NCKAP1L	3.10951	0.00142614
ENSG00000123360	PDE1B	4.57995	0.000337
ENSG00000170439	METTL7B	1.13367	4.75e-19
ENSG00000135424	ITGA7	1.35462	0.000271
ENSG00000182796	TMEM198B	1.11605	1.56e-08
ENSG00000197728	RPS26	1.0266	1.93e-11
ENSG00000139540	SLC39A5	1.29325	0.000932
ENSG00000170426	SDR9C7	4.25002	0.000233
ENSG00000139547	RDH16	3.29982	9.31e-32
ENSG00000166863	TAC3	4.67766	3.31e-06
ENSG00000166866	MYO1A	1.38682	0.0209281
ENSG00000185482	STAC3	1.32419	2.73e-05
ENSG00000139269	INHBE	2.10429	0.0360473
ENSG00000175197	DDIT3	1.27835	8.02e-05
ENSG00000208028	MIR616	1.7559	0.000643
ENSG00000135407	AVIL	-1.67556	0.000115
ENSG00000118596	SLC16A7	-2.08994	0.00726222
ENSG00000149948	HMGA2	-2.13489	3.96e-05
ENSG00000239335	RP11-745O10.2	1.58018	0.000195
ENSG00000247363	RP11-637A17.2	1.44023	0.0176688
ENSG00000127324	TSPAN8	-6.07811	4.88e-08
ENSG00000257497	RP11-585P4.5	1.66247	4.45e-06
ENSG00000067798	NAV3	-1.14981	3.52e-07
ENSG00000133640	LRRIQ1	-1.29249	0.00328923
ENSG00000270344	RP11-734K2.4	1.40073	3.27e-05
ENSG00000165972	CCDC38	1.57319	0.0474642
ENSG00000188596	C12orf55	-2.01879	9.9e-05
ENSG00000212443	SNORA53	1.89663	0.00251456
ENSG00000221625	AC013283.1	-1.8852	0.000565
ENSG00000255150	EID3	1.60927	0.0205592
ENSG00000074590	NUAK1	-1.7968	9.44e-46
ENSG00000151136	BTBD11	-1.25283	1.73e-29
ENSG00000256139	RP11-968O1.5	-1.60055	0.0275586
ENSG00000200274	RNU4-32P	2.83516	0.00144228
ENSG00000111344	RASAL1	2.13201	7.9e-10
ENSG00000135094	SDS	1.34529	0.00650991
ENSG00000139410	SDSL	1.12201	4.67e-20
ENSG00000135111	TBX3	-1.16005	3.86e-17
ENSG00000196668	LINC00173	1.70224	4.19e-08
ENSG00000258102	RP11-809C9.2	1.57578	0.0387588
ENSG00000088992	TESC	-1.29728	3.83e-09
ENSG00000089250	NOS1	-5.62308	3.9e-18
ENSG00000171435	KSR2	-2.58233	1.67e-15
ENSG00000135127	CCDC64	1.31832	8.13e-19
ENSG00000089163	SIRT4	1.00538	0.00178291
ENSG00000272214	AC079602.1	-1.3905	0.0204356
ENSG00000158104	HPD	1.8304	4.94e-06
ENSG00000256546	AC156455.1	1.04669	0.00901525
ENSG00000256304	RP11-512M8.3	-1.53518	0.000216
ENSG00000197653	DNAH10	2.22364	9.65e-08
ENSG00000119242	CCDC92	-1.39512	1.67e-24
ENSG00000150991	UBC	2.15146	6.59e-07
ENSG00000249196	RP11-669N7.2	4.43973	0.000536
ENSG00000111450	STX2	-1.07753	2.42e-07
ENSG00000182870	GALNT9	-1.69507	0.0089044
ENSG00000256943	RP13-895J2.2	1.9449	0.000223
ENSG00000256542	RP13-895J2.3	1.32111	0.0470944
ENSG00000032742	IFT88	-1.30516	8.55e-12
ENSG00000075673	ATP12A	2.85811	0.0189397
ENSG00000253771	TPTE2P1	1.71749	4.35e-06
ENSG00000122026	RPL21	1.19334	9.94e-17
ENSG00000139515	PDX1	1.78816	0.0259934
ENSG00000139597	N4BP2L1	-1.78213	0.047819
ENSG00000120693	SMAD9	1.69453	0.00785234
ENSG00000102780	DGKH	-1.12358	1.84e-09
ENSG00000120658	ENOX1	3.25028	6.64e-20
ENSG00000253051	SNORA31	-2.1008	0.0325547
ENSG00000136167	LCP1	2.81549	0.0037565
ENSG00000231665	OGFOD1P1	2.89416	0.00255115
ENSG00000270101	RP11-24B19.3	1.14657	8.55e-06
ENSG00000118946	PCDH17	-4.76281	7.18e-13
ENSG00000118922	KLF12	-1.20156	9.46e-10
ENSG00000136155	SCEL	2.31323	0.000587
ENSG00000139737	SLAIN1	-1.13395	2.01e-05
ENSG00000184564	SLITRK6	-2.96494	1.37e-23
ENSG00000088387	DOCK9	-1.07012	4.76e-18
ENSG00000260992	DOCK9-AS2	-1.4301	0.0490756
ENSG00000125246	CLYBL	-1.4939	4.96e-10
ENSG00000102452	NALCN	-1.1688	2.43e-08
ENSG00000125266	EFNB2	-1.53257	0.0030674
ENSG00000187498	COL4A1	-1.00366	8.1e-06
ENSG00000057593	F7	1.06492	0.00353485
ENSG00000139835	GRTP1	1.00159	1.36e-06
ENSG00000258027	RP11-597A11.1	4.21174	0.00672444
ENSG00000258818	RNASE4	2.3402	0.00380386
ENSG00000214274	ANG	1.08091	1.31e-16
ENSG00000155465	SLC7A7	1.14889	0.0108226
ENSG00000157227	MMP14	1.6614	8.57e-11
ENSG00000258727	RP11-66N24.3	1.03882	1.05e-07
ENSG00000186648	LRRC16B	1.3231	1.08e-05
ENSG00000259321	RP11-468E2.5	-2.96502	0.00593852
ENSG00000136305	CIDEB	4.19181	0.00692266
ENSG00000213903	LTB4R	1.17431	4.3e-24
ENSG00000100968	NFATC4	1.11775	0.0494247
ENSG00000258744	RP11-80A15.1	3.24343	0.000163
ENSG00000183032	SLC25A21	1.0641	0.00198983
ENSG00000150526	MIA2	1.52521	0.00478182
ENSG00000259000	CTD-2373J19.1	-3.29411	0.0154506
ENSG00000198718	FAM179B	-1.01964	6.24e-10
ENSG00000197776	KLHDC1	-1.21328	0.0325656
ENSG00000214900	C14orf182	-1.06008	0.00590286
ENSG00000258711	RP11-218E20.3	-1.11448	0.000618
ENSG00000139926	FRMD6	-1.58115	3.61e-24
ENSG00000087303	NID2	2.48763	0.0186767
ENSG00000087301	TXNDC16	-1.04036	5.23e-07
ENSG00000165617	DACT1	-1.9901	0.0165386
ENSG00000258777	HIF1A-AS1	-1.83658	0.0106892
ENSG00000258824	CTD-2555O16.2	-1.35608	0.0206336
ENSG00000070182	SPTB	-1.34549	4.25e-14
ENSG00000198133	TMEM229B	1.33595	0.00686834
ENSG00000081181	ARG2	2.24281	3.87e-09
ENSG00000139988	RDH12	3.44516	0.00582528
ENSG00000185650	ZFP36L1	-1.41564	3.74e-09
ENSG00000100626	GALNT16	1.2687	1.64e-13
ENSG00000139985	ADAM21	3.24225	5.09e-08
ENSG00000100767	PAPLN	-2.58413	1.28e-23
ENSG00000119636	CCDC176	-2.0963	5.21e-09
ENSG00000198208	RPS6KL1	2.09194	1.05e-08
ENSG00000119630	PGF	1.48638	1.6e-07
ENSG00000170345	FOS	1.8136	3.81e-05
ENSG00000119685	TTLL5	-1.03097	3.52e-15
ENSG00000119715	ESRRB	3.25099	9.83e-11
ENSG00000165548	TMEM63C	1.33753	2.5e-07
ENSG00000100583	SAMD15	-1.02052	0.00619362
ENSG00000021645	NRXN3	-3.54471	7.75e-11
ENSG00000185070	FLRT2	-4.0685	1.81e-49
ENSG00000165521	EML5	-1.75213	1.16e-07
ENSG00000100784	RPS6KA5	-1.12655	5.04e-08
ENSG00000100604	CHGA	1.76146	8.7e-08
ENSG00000165949	IFI27	2.79165	1.12e-24
ENSG00000133937	GSC	1.21126	0.0437381
ENSG00000176438	SYNE3	1.19226	0.0244603
ENSG00000227051	C14orf132	-1.33741	6.4e-20
ENSG00000168398	BDKRB2	-1.26107	3.95e-24
ENSG00000140057	AK7	-2.489	7.33e-45
ENSG00000258702	RP11-433J8.1	1.08448	0.00336601
ENSG00000066629	EML1	-1.28516	5.72e-27
ENSG00000259230	CTD-2555C10.3	2.99226	0.010585
ENSG00000205436	EXOC3L4	1.10047	2.24e-09
ENSG00000256050	RP11-982M15.6	-2.06158	0.0123832
ENSG00000185100	ADSSL1	-1.25943	1.37e-20
ENSG00000183484	GPR132	-2.66911	1.18e-06
ENSG00000226174	TEX22	1.16482	0.00483641
ENSG00000182809	CRIP2	-2.18258	3.64e-17
ENSG00000259344	RP11-566K19.6	1.58502	0.0325431
ENSG00000104044	OCA2	1.45102	0.0131548
ENSG00000256802	RP11-680F8.1	-1.27221	2.81e-25
ENSG00000178081	ULK4P3	-1.39324	0.00140724
ENSG00000261794	GOLGA8H	-1.11319	0.00449294
ENSG00000166923	GREM1	-5.6494	1.74e-52
ENSG00000134153	EMC7	1.02964	2.69e-22
ENSG00000261559	RP11-1H8.3	-1.22945	0.00968072
ENSG00000172575	RASGRP1	-1.08182	0.0432551
ENSG00000166073	GPR176	-1.02434	0.00127455
ENSG00000166143	PPP1R14D	1.05511	0.0303212
ENSG00000166145	SPINT1	1.31175	0.00392993
ENSG00000104140	RHOV	1.10185	0.00225561
ENSG00000128965	CHAC1	1.73565	1.45e-09
ENSG00000178997	EXD1	2.4574	0.00154509
ENSG00000137806	NDUFAF1	1.03979	5.29e-15
ENSG00000092445	TYRO3	-1.14759	1.01e-16
ENSG00000137877	SPTBN5	2.60375	1.1e-07
ENSG00000272003	RP11-23P13.7	1.56075	0.00056
ENSG00000237289	CKMT1B	1.0355	0.00191763
ENSG00000242866	STRC	3.17767	0.0035672
ENSG00000223572	CKMT1A	1.12782	0.000516
ENSG00000171877	FRMD5	-1.44351	4.97e-06
ENSG00000229474	PATL2	2.03533	0.00857299
ENSG00000137860	SLC28A2	1.05352	0.0138987
ENSG00000166920	C15orf48	1.96259	3.8e-05
ENSG00000207484	Y_RNA	3.52798	0.000244
ENSG00000128833	MYO5C	-1.29373	7.36e-27
ENSG00000169856	ONECUT1	-1.50667	0.0162552
ENSG00000171016	PYGO1	-1.02087	8.54e-06
ENSG00000140416	TPM1	-1.23067	5.06e-33
ENSG00000259248	USP3-AS1	1.37243	0.00224766
ENSG00000186198	SLC51B	1.81727	4.47e-07
ENSG00000103742	IGDCC4	-1.23948	1.02e-09
ENSG00000261318	RP11-653J6.1	1.92224	0.0262202
ENSG00000103599	IQCH	-1.46752	2.46e-06
ENSG00000128973	CLN6	-1.07465	7.61e-11
ENSG00000137809	ITGA11	-3.97342	6.29e-80
ENSG00000103647	CORO2B	-2.9137	2.81e-12
ENSG00000137819	PAQR5	-1.26865	2.95e-29
ENSG00000187720	THSD4	-1.09712	1.15e-24
ENSG00000031544	NR2E3	1.19431	0.000185
ENSG00000260037	CTD-2524L6.3	1.46687	0.000568
ENSG00000261423	RP11-1007O24.3	1.29531	0.000102
ENSG00000260144	RP11-361M10.3	1.76968	0.00973293
ENSG00000260898	ADPGK-AS1	2.44101	0.0299214
ENSG00000138623	SEMA7A	1.29691	0.00439198
ENSG00000140465	CYP1A1	2.36059	0.00449601
ENSG00000203392	AC105020.1	1.27529	0.00457761
ENSG00000246877	DNM1P35	1.62831	0.0008
ENSG00000169752	NRG4	2.19873	1.82e-25
ENSG00000169758	C15orf27	2.53814	0.00155572
ENSG00000269951	RP11-797A18.6	1.92802	9.24e-06
ENSG00000166426	CRABP1	1.18964	0.000526
ENSG00000140379	BCL2A1	-1.14044	0.0242679
ENSG00000172379	ARNT2	-1.37485	1.2e-26
ENSG00000103888	KIAA1199	-1.84019	5.98e-08
ENSG00000259343	RP11-761I4.3	1.85135	0.0186837
ENSG00000103723	AP3B2	1.67139	0.000487
ENSG00000259315	RP11-752G15.9	1.25278	0.0091267
ENSG00000156218	ADAMTSL3	1.47961	0.0218149
ENSG00000259728	LINC00933	-2.14253	0.00952529
ENSG00000140538	NTRK3	-3.24118	1.8e-43
ENSG00000172183	ISG20	1.13023	1.51e-16
ENSG00000255571	LINC00925	2.10148	0.000123
ENSG00000188095	MESP2	1.04312	0.00980238
ENSG00000242498	C15orf38	-1.19962	2.44e-18
ENSG00000259291	RP11-617F23.1	-1.51782	2.91e-05
ENSG00000228998	RP11-697E2.7	-1.15324	3.79e-11
ENSG00000182511	FES	1.46781	0.0182793
ENSG00000224441	AC068831.3	-2.32622	0.0219797
ENSG00000140450	ARRDC4	1.10394	9.11e-05
ENSG00000259583	RP11-66B24.4	-1.10363	0.00105148
ENSG00000242173	ARHGDIG	-1.00058	0.0220032
ENSG00000228201	AL022341.3	2.76549	0.00649053
ENSG00000261713	SSTR5-AS1	-2.91476	8.56e-08
ENSG00000196557	CACNA1H	-1.27675	1.5e-13
ENSG00000197599	CCDC154	-1.08239	0.0151394
ENSG00000065054	SLC9A3R2	-1.15857	4.16e-25
ENSG00000182685	BRICD5	-2.01976	7.6e-26
ENSG00000259780	RP11-304L19.12	2.00865	0.000417
ENSG00000167968	DNASE1L2	-1.17828	0.000744
ENSG00000167972	ABCA3	-1.92943	2.04e-59
ENSG00000172382	PRSS27	-2.82927	7.8e-13
ENSG00000205913	SRRM2-AS1	1.12447	0.00644831
ENSG00000162073	PAQR4	-1.08984	2.81e-19
ENSG00000008517	IL32	1.47779	7.56e-07
ENSG00000183044	ABAT	1.372	0.000318
ENSG00000260276	RP11-77H9.2	1.68605	9.16e-09
ENSG00000259939	RP11-77H9.5	1.37529	0.0180718
ENSG00000263013	RP11-876N24.5	1.49065	2.17e-05
ENSG00000262454	RP11-65J21.3	-1.22663	0.000844
ENSG00000166780	C16orf45	-1.59028	1.35e-32
ENSG00000072864	NDE1	-1.07971	1.14e-17
ENSG00000103489	XYLT1	-1.55587	1.22e-07
ENSG00000103534	TMC5	-1.45801	2.95e-25
ENSG00000103540	CCP110	-1.1746	1.83e-18
ENSG00000175311	ANKS4B	1.21647	0.000324
ENSG00000168447	SCNN1B	-2.77598	1.07e-10
ENSG00000260448	RP11-449H11.1	1.07624	0.0126578
ENSG00000259940	CTD-3203P2.1	2.91431	1.53e-10
ENSG00000103522	IL21R	2.94846	0.000551
ENSG00000196502	SULT1A1	1.61159	0.00830155
ENSG00000196993	NPIPB9	-1.54758	0.00985254
ENSG00000103485	QPRT	1.91373	2.79e-14
ENSG00000261840	RP11-146F11.1	1.35272	0.00231265
ENSG00000103490	PYCARD	-1.76099	2e-09
ENSG00000140675	SLC5A2	1.27228	0.0114101
ENSG00000121281	ADCY7	-1.33331	1.24e-29
ENSG00000261685	RP11-401P9.4	-3.04067	2.07e-05
ENSG00000103449	SALL1	1.31635	0.0252804
ENSG00000103460	TOX3	-1.50633	7.39e-10
ENSG00000087245	MMP2	-1.48207	1.06e-09
ENSG00000125148	MT2A	-2.04454	1.14e-20
ENSG00000187193	MT1X	-1.03836	0.00234311
ENSG00000140848	CPNE2	-1.57121	5.89e-39
ENSG00000205336	GPR56	-1.182	5.41e-26
ENSG00000166546	BEAN1	-3.02343	5.61e-19
ENSG00000217555	CKLF	1.00448	0.00103777
ENSG00000089505	CMTM1	-1.65061	0.0020708
ENSG00000172828	CES3	1.20753	4.26e-05
ENSG00000125122	LRRC29	1.80573	1.37e-10
ENSG00000159713	TPPP3	-3.40328	2.24e-40
ENSG00000102981	PARD6A	-1.08378	0.000216
ENSG00000102901	CENPT	1.09117	2.57e-22
ENSG00000261556	RP11-296I10.6	-1.03471	6.09e-06
ENSG00000261777	RP11-529K1.2	-1.20837	0.0335445
ENSG00000214331	RP11-252A24.2	-1.00494	0.00111282
ENSG00000103089	FA2H	-1.89657	1.37e-12
ENSG00000178573	MAF	-5.6266	2.32e-16
ENSG00000103154	NECAB2	-3.50446	5.21e-44
ENSG00000064270	ATP2C2	1.66273	0.0365249
ENSG00000176678	FOXL1	-1.73978	4.47e-10
ENSG00000154118	JPH3	-1.43274	1.57e-05
ENSG00000225614	ZNF469	-2.53287	5.01e-56
ENSG00000141012	GALNS	-1.07825	1.62e-06
ENSG00000129993	CBFA2T3	-2.3949	0.012466
ENSG00000180422	LINC00304	3.42082	2.09e-05
ENSG00000167523	SPATA33	-1.19965	1.8e-11
ENSG00000158805	ZNF276	1.07024	0.000182
ENSG00000258947	TUBB3	1.26544	0.00124068
ENSG00000260528	FAM157C	2.87982	0.0252808
ENSG00000272636	DOC2B	-1.23103	0.00683031
ENSG00000187624	C17orf97	-2.96483	1.47e-29
ENSG00000231784	DBIL5P	1.38948	0.00266228
ENSG00000074660	SCARF1	-3.46528	0.002533
ENSG00000167705	RILP	1.11948	4.49e-10
ENSG00000186594	MIR22HG	1.25348	0.0206431
ENSG00000132386	SERPINF1	1.12787	0.000301
ENSG00000185924	RTN4RL1	-2.3444	6.52e-14
ENSG00000167720	SRR	-1.46731	1.45e-21
ENSG00000262884	CTD-3060P21.1	-1.44304	0.00401079
ENSG00000167723	TRPV3	1.52334	0.000109
ENSG00000262194	CTD-3195I5.5	1.2488	6.26e-05
ENSG00000004660	CAMKK1	-1.5674	4.28e-17
ENSG00000141497	ZMYND15	1.69151	5.15e-05
ENSG00000142484	TM4SF5	2.79067	5.47e-07
ENSG00000182853	VMO1	-1.60659	1.99e-06
ENSG00000182327	GLTPD2	3.90043	0.00297309
ENSG00000108556	CHRNE	2.74351	0.000166
ENSG00000205710	C17orf107	-1.74576	0.0208208
ENSG00000132517	SLC52A1	1.25076	7.54e-06
ENSG00000141485	SLC13A5	2.79942	2.01e-09
ENSG00000262943	ALOX12P2	1.05571	4.58e-07
ENSG00000219200	RNASEK	1.23234	1.01e-09
ENSG00000141505	ASGR1	2.30185	7.17e-05
ENSG00000181885	CLDN7	2.05203	0.0145031
ENSG00000181856	SLC2A4	1.1667	0.00136459
ENSG00000006047	YBX2	1.48576	2.31e-16
ENSG00000161960	EIF4A1	1.56659	4.85e-06
ENSG00000129214	SHBG	1.47118	0.00823044
ENSG00000129244	ATP1B2	11.4068	3.74e-13
ENSG00000262251	RP11-199F11.2	1.51021	1.22e-21
ENSG00000108947	EFNB3	-1.29412	3.41e-06
ENSG00000132518	GUCY2D	2.04606	0.00944331
ENSG00000179148	ALOXE3	1.89511	9.9e-05
ENSG00000179111	HES7	1.04649	2.96e-07
ENSG00000065320	NTN1	2.48035	3.22e-05
ENSG00000065325	GLP2R	-2.13159	6.63e-59
ENSG00000109063	MYH3	1.32506	1e-10
ENSG00000141052	MYOCD	-1.54885	3.63e-09
ENSG00000266709	RP11-214O1.2	2.93677	0.000102
ENSG00000125409	TEKT3	1.39656	0.0342403
ENSG00000251537	RP11-385D13.1	-1.03733	0.0331707
ENSG00000214946	TBC1D26	2.56934	0.00724698
ENSG00000170160	CCDC144A	-1.14621	6.78e-06
ENSG00000205309	NT5M	-3.78613	1.02e-69
ENSG00000171962	LRRC48	-1.25436	0.000275
ENSG00000171931	FBXW10	-1.36135	4.3e-06
ENSG00000154025	SLC5A10	-1.24259	0.00849673
ENSG00000265263	RP11-135L13.4	-1.02636	0.00700318
ENSG00000128482	RNF112	1.32712	1.69e-07
ENSG00000108602	ALDH3A1	-1.21977	2.94e-17
ENSG00000214832	UPF3AP2	-1.13514	0.00405855
ENSG00000189423	USP32P3	-1.21409	0.00106927
ENSG00000168961	LGALS9	1.88451	3.39e-05
ENSG00000007171	NOS2	1.5601	0.0104233
ENSG00000237575	PYY2	2.08104	4.68e-07
ENSG00000260777	CTD-2008P7.1	1.75204	0.0392145
ENSG00000109072	VTN	2.21793	0.00901452
ENSG00000238578	SNORD4A	1.10468	1.59e-05
ENSG00000179761	PIPOX	1.75983	0.00170911
ENSG00000264808	MIR4523	1.7462	0.0282385
ENSG00000266876	RP11-1148O4.1	-1.33042	0.0010737
ENSG00000264743	DPRXP4	1.39367	0.00586014
ENSG00000141314	RHBDL3	-2.56106	4.6e-32
ENSG00000108691	CCL2	1.33919	9.63e-05
ENSG00000166750	SLFN5	-1.35453	1.05e-20
ENSG00000154768	C17orf50	1.57753	0.0489274
ENSG00000237805	AC015849.2	2.90001	1.82e-07
ENSG00000197681	TBC1D3	1.62477	0.000496
ENSG00000225485	ARHGAP23	-1.34247	9.68e-26
ENSG00000161381	PLXDC1	2.53423	5.84e-06
ENSG00000141750	STAC2	1.52173	0.028328
ENSG00000264655	CTD-2267D19.4	-4.14687	0.00284583
ENSG00000131746	TNS4	-2.50242	1.14e-58
ENSG00000266088	RP5-1028K7.2	-2.91906	2.21e-21
ENSG00000126353	CCR7	-1.15728	0.00600668
ENSG00000198443	KRTAP4-1	-2.03214	0.00754432
ENSG00000248807	KRTAP9-12P	-1.75634	0.00173851
ENSG00000204815	TTC25	-1.32629	1.64e-05
ENSG00000187595	ZNF385C	1.09769	0.0325053
ENSG00000033627	ATP6V0A1	1.09627	4.6e-24
ENSG00000126562	WNK4	1.51207	1.7e-05
ENSG00000131480	AOC2	1.77505	5.17e-24
ENSG00000131471	AOC3	2.40126	9.72e-46
ENSG00000260105	AOC4P	4.90968	0.00430874
ENSG00000068079	IFI35	1.32017	0.000124
ENSG00000261514	RP11-527L4.2	1.83108	0.00223791
ENSG00000108309	RUNDC3A	1.29741	0.0426467
ENSG00000172992	DCAKD	-1.13253	1.83e-18
ENSG00000167183	PRR15L	1.4311	0.00113641
ENSG00000262745	CTD-2377D24.8	-2.16284	1.79e-10
ENSG00000244649	CTD-2377D24.6	-2.01379	4.13e-25
ENSG00000173868	PHOSPHO1	1.21738	0.0431904
ENSG00000064300	NGFR	3.01666	1.9e-13
ENSG00000204584	RP11-304F15.3	2.33743	4.59e-21
ENSG00000253730	RP11-893F2.13	1.92753	0.00294463
ENSG00000250286	RP11-94C24.8	1.51947	4.63e-06
ENSG00000006283	CACNA1G	-1.38921	7.39e-11
ENSG00000153930	ANKFN1	3.37083	0.000375
ENSG00000267248	CTD-2319I12.4	1.09002	0.00496829
ENSG00000173838	2020-03-10	-1.16771	0.0440116
ENSG00000240280	TCAM1P	2.39832	0.00526402
ENSG00000224383	C17orf72	-1.28036	0.0218284
ENSG00000266402	SNORA76	1.38691	4.34e-12
ENSG00000199753	SNORD104	1.30937	1.59e-14
ENSG00000108370	RGS9	1.46893	0.00114025
ENSG00000168646	AXIN2	-1.084	4.8e-06
ENSG00000075461	CACNG4	-2.58264	5.33e-56
ENSG00000256124	LINC01152	2.29365	0.000291
ENSG00000234899	SOX9-AS1	1.40172	0.0106426
ENSG00000267893	AC007461.1	2.58023	0.0140758
ENSG00000227036	LINC00511	-1.03807	6.31e-16
ENSG00000187959	CPSF4L	2.5856	0.00331731
ENSG00000204323	SMIM5	-2.05556	0.00479969
ENSG00000132470	ITGB4	-1.26316	1.33e-31
ENSG00000204316	MRPL38	1.08036	1.64e-06
ENSG00000267376	ATP5LP6	7.63259	0.00326105
ENSG00000176170	SPHK1	1.19607	0.00334758
ENSG00000070731	ST6GALNAC2	-2.15239	9.56e-06
ENSG00000261335	RP11-318A15.2	1.56608	2.29e-06
ENSG00000266970	RP11-806H10.4	1.98949	1.42e-06
ENSG00000035862	TIMP2	-1.01944	1.01e-21
ENSG00000108679	LGALS3BP	1.01119	0.00255788
ENSG00000167280	ENGASE	1.01618	2.15e-20
ENSG00000262580	RP11-334C17.5	1.24763	3.53e-19
ENSG00000171246	NPTX1	-2.12424	2.8e-06
ENSG00000185168	LINC00482	1.96665	1.52e-05
ENSG00000185332	TMEM105	1.20065	0.00518682
ENSG00000171282	RP11-1055B8.7	-1.42096	1.6e-15
ENSG00000229848	RP13-766D20.2	-1.77713	0.0223264
ENSG00000186765	FSCN2	-1.32367	0.00479759
ENSG00000141526	SLC16A3	-1.09823	0.00233123
ENSG00000141574	SECTM1	-1.61506	0.0303147
ENSG00000266405	CBX3P2	-1.81966	0.00331598
ENSG00000101596	SMCHD1	-1.06159	1.19e-18
ENSG00000101577	LPIN2	-1.07998	1.63e-19
ENSG00000267733	RP11-64C12.3	1.33485	0.00248856
ENSG00000267108	RP11-861E21.1	1.37954	0.0119639
ENSG00000168675	LDLRAD4	-2.0947	3.41e-17
ENSG00000266010	GATA6-AS1	2.06907	0.00124372
ENSG00000154059	IMPACT	-1.0006	4.95e-13
ENSG00000154080	CHST9	4.18447	0.0234543
ENSG00000170558	CDH2	-1.98479	0.00225456
ENSG00000118271	TTR	3.40283	0.000968
ENSG00000265008	RP11-53I6.3	1.33268	0.0380872
ENSG00000134775	FHOD3	-2.2646	1.16e-28
ENSG00000267414	RP11-456K23.1	-1.75842	0.0287683
ENSG00000152217	SETBP1	-1.40256	8.58e-14
ENSG00000267541	RP11-380M21.2	1.02349	4.84e-05
ENSG00000101665	SMAD7	-1.01994	2.9e-13
ENSG00000187323	DCC	2.4878	0.0117678
ENSG00000041353	RAB27B	-1.13101	4.9e-21
ENSG00000166510	CCDC68	-1.03742	4.06e-14
ENSG00000196628	TCF4	-1.23113	8.84e-06
ENSG00000183287	CCBE1	-3.13455	5.2e-23
ENSG00000166396	SERPINB7	-2.83023	3.27e-09
ENSG00000071991	CDH19	-7.10507	6.86e-17
ENSG00000266278	RP11-41O4.2	-1.27316	0.0304103
ENSG00000141668	CBLN2	-1.65256	0.00184582
ENSG00000261780	CTD-2354A18.1	-1.05122	2.88e-05
ENSG00000267655	CTD-2286N8.2	2.09989	0.00391199
ENSG00000129946	SHC2	-1.53444	4.55e-07
ENSG00000099866	MADCAM1	2.14872	0.000501
ENSG00000267530	AC006273.5	-1.04044	4.72e-09
ENSG00000266927	AC006273.7	-1.32661	0.00274458
ENSG00000065268	WDR18	-1.32132	5.2e-26
ENSG00000116032	GRIN3B	-1.17133	1.22e-06
ENSG00000099624	ATP5D	-1.3359	2.53e-08
ENSG00000115266	APC2	1.89896	3.92e-13
ENSG00000181588	MEX3D	-1.1684	6.46e-11
ENSG00000213638	ADAT3	1.0598	0.000458
ENSG00000133243	BTBD2	-1.35303	3.22e-29
ENSG00000104899	AMH	-1.2142	5.2e-18
ENSG00000261342	AC006538.1	1.76227	1.56e-05
ENSG00000183397	C19orf71	2.61116	1.25e-05
ENSG00000267436	AC005786.7	1.81996	0.00882948
ENSG00000064961	HMG20B	-1.43155	1.54e-12
ENSG00000105289	TJP3	1.03938	0.00529421
ENSG00000267030	CTB-50L17.7	-4.19375	2.56e-05
ENSG00000267769	CTB-50L17.9	-2.4195	0.00518156
ENSG00000212123	PRR22	2.35332	4.08e-15
ENSG00000181240	SLC25A41	1.81905	3.4e-06
ENSG00000125657	TNFSF9	1.59784	2.6e-31
ENSG00000198816	ZNF358	-1.13139	1.12e-13
ENSG00000181029	TRAPPC5	1.13745	0.0242428
ENSG00000178531	CTXN1	-1.24712	1.9e-07
ENSG00000186994	KANK3	1.02214	1.55e-05
ENSG00000080573	COL5A3	2.24979	3.74e-11
ENSG00000167798	C3P1	2.43987	0.00326759
ENSG00000130812	ANGPTL6	2.35339	0.0254707
ENSG00000244165	P2RY11	-2.18358	7.88e-09
ENSG00000105518	TMEM205	1.18199	4.07e-28
ENSG00000183401	CCDC159	1.16399	1.37e-08
ENSG00000196361	ELAVL3	4.31539	1.04e-05
ENSG00000196757	ZNF700	-3.96851	8.98e-07
ENSG00000171223	JUNB	-1.53679	1.36e-16
ENSG00000127507	EMR2	2.57088	3.42e-15
ENSG00000011243	AKAP8L	1.03089	3.06e-08
ENSG00000186529	CYP4F3	1.55645	2.15e-05
ENSG00000186204	CYP4F12	1.55026	1.61e-21
ENSG00000186115	CYP4F2	1.99895	0.0327571
ENSG00000127528	KLF2	1.02662	6.67e-05
ENSG00000160117	ANKLE1	-1.13341	0.0105695
ENSG00000130303	BST2	1.47088	0.0424667
ENSG00000105650	PDE4C	2.67019	1.18e-06
ENSG00000264175	MIR3189	1.17047	0.0222396
ENSG00000006016	CRLF1	-2.50145	1.66e-08
ENSG00000254901	MEF2BNB	1.36085	4.08e-14
ENSG00000213996	TM6SF2	1.87152	0.0281976
ENSG00000160161	CILP2	-1.74372	0.0222645
ENSG00000160352	ZNF714	-1.28631	5.1e-08
ENSG00000196081	ZNF724P	-2.2657	0.00171072
ENSG00000169021	UQCRFS1	1.19361	1.47e-28
ENSG00000121297	TSHZ3	-1.67685	1.28e-15
ENSG00000269303	CTD-2527I21.7	2.07947	0.0107462
ENSG00000105711	SCN1B	-1.547	7.38e-23
ENSG00000161249	DMKN	1.37945	2.65e-10
ENSG00000105668	UPK1A	1.26789	0.00223283
ENSG00000226510	UPK1A-AS1	2.04392	0.000443
ENSG00000105663	KMT2B	1.15443	0.0268024
ENSG00000250799	PRODH2	1.26612	3.41e-10
ENSG00000161270	NPHS1	1.3872	0.00104527
ENSG00000126259	KIRREL2	1.88002	0.00276364
ENSG00000232677	LINC00665	1.75773	0.000185
ENSG00000196967	ZNF585A	1.50834	1.25e-06
ENSG00000267473	AC005789.11	1.45983	7.34e-08
ENSG00000171747	LGALS4	1.32917	6.59e-07
ENSG00000262484	CCER2	-1.48735	0.000144
ENSG00000128016	ZFP36	1.01346	0.0152432
ENSG00000090920	FCGBP	-2.22795	3.65e-33
ENSG00000197019	SERTAD1	1.03703	8.97e-10
ENSG00000160460	SPTBN4	1.62561	7.33e-05
ENSG00000204978	C19orf69	2.5301	0.000381
ENSG00000270164	AC006129.4	5.24477	8.01e-12
ENSG00000105409	ATP1A3	2.75487	4.8e-29
ENSG00000105737	GRIK5	1.16731	0.000567
ENSG00000167619	TMEM145	1.26843	4.89e-10
ENSG00000079385	CEACAM1	1.04628	3.16e-12
ENSG00000204941	PSG5	-2.46254	0.00439198
ENSG00000226763	SRRM5	2.03695	4.15e-12
ENSG00000104783	KCNN4	-1.09089	0.000298
ENSG00000204920	ZNF155	1.01687	4.52e-06
ENSG00000159915	ZNF233	1.11787	0.0140141
ENSG00000176395	CEACAM20	5.68722	0.0151084
ENSG00000230666	CEACAM22P	3.89485	0.0342754
ENSG00000186567	CEACAM19	-1.4634	2.89e-09
ENSG00000130203	APOE	2.06624	2.52e-34
ENSG00000130208	APOC1	1.24101	9.45e-26
ENSG00000104892	KLC3	2.56339	1.05e-10
ENSG00000010310	GIPR	1.043	0.000582
ENSG00000268621	AC006262.5	-2.68717	5.79e-28
ENSG00000268460	AC006262.6	-3.56583	0.000277
ENSG00000188293	IGFL1	-5.31382	0.000139
ENSG00000197380	DACT3	2.51349	0.034882
ENSG00000105281	SLC1A5	1.04465	3.21e-24
ENSG00000197405	C5AR1	2.42254	0.000289
ENSG00000134830	C5AR2	2.48467	0.00605446
ENSG00000118160	SLC8A2	1.83604	9.41e-05
ENSG00000105499	PLA2G4C	1.04405	0.0242227
ENSG00000268001	CTC-241F20.3	1.75855	0.0449925
ENSG00000269423	CTC-273B12.6	1.06254	0.0026292
ENSG00000176909	MAMSTR	1.34161	0.00115368
ENSG00000174951	FUT1	2.66743	0.00184841
ENSG00000087076	HSD17B14	1.72991	6.68e-12
ENSG00000105559	PLEKHA4	1.89421	3.99e-11
ENSG00000260366	CTD-2639E6.4	2.64059	0.00845223
ENSG00000225950	NTF4	1.22757	0.00514639
ENSG00000104951	IL4I1	2.35204	0.00386722
ENSG00000131398	KCNC3	2.16993	3.48e-21
ENSG00000131400	NAPSA	1.44528	1.99e-12
ENSG00000269404	SPIB	4.81017	3.56e-12
ENSG00000161681	SHANK1	2.45674	0.0213543
ENSG00000167751	KLK2	3.53821	2.69e-11
ENSG00000129451	KLK10	2.69936	0.0133971
ENSG00000129437	KLK14	1.13593	0.0243396
ENSG00000105383	CD33	3.23642	0.00213416
ENSG00000267905	CTD-2616J11.16	1.24999	0.0328244
ENSG00000269388	AC018755.16	1.01697	0.00317946
ENSG00000204611	ZNF616	1.0944	0.000811
ENSG00000126583	PRKCG	1.199	3.54e-10
ENSG00000130433	CACNG6	-2.30277	8.53e-73
ENSG00000167617	CDC42EP5	3.06965	0.00907208
ENSG00000088053	GP6	1.93174	0.00601923
ENSG00000129990	SYT5	1.63663	0.0263796
ENSG00000095752	IL11	-2.52787	6.14e-68
ENSG00000179954	SSC5D	1.38816	0.00137499
ENSG00000187550	SBK2	-1.31613	9.43e-05
ENSG00000160505	NLRP4	2.63053	0.0373723
ENSG00000240225	ZNF542	1.57642	3.57e-06
ENSG00000018869	ZNF582	2.32923	2.67e-08
ENSG00000198440	ZNF583	1.28431	0.000296
ENSG00000105146	AURKC	1.98251	0.000188
ENSG00000270804	CTD-2583A14.11	1.02681	0.00307246
ENSG00000198131	ZNF544	1.02923	5.94e-11
ENSG00000267216	AC010642.1	1.70672	3.54e-06
ENSG00000130508	PXDN	-3.61606	6.89e-88
ENSG00000271868	RP11-1293J14.1	2.33122	1.04e-06
ENSG00000118004	COLEC11	1.38729	0.0151664
ENSG00000151693	ASAP2	-1.38614	1.03e-32
ENSG00000272275	RP11-791G15.2	2.16061	2.25e-19
ENSG00000230154	AC018463.4	-1.24393	0.0317835
ENSG00000196208	GREB1	1.69008	3.48e-10
ENSG00000170745	KCNS3	-2.78473	1.04e-39
ENSG00000143878	RHOB	1.00427	0.020982
ENSG00000084710	EFR3B	-1.29132	1.46e-13
ENSG00000179061	AC012074.1	3.02224	0.00663495
ENSG00000157851	DPYSL5	-1.44487	1.99e-14
ENSG00000138080	EMILIN1	1.36537	0.0021833
ENSG00000084734	GCKR	2.59802	4.38e-06
ENSG00000205334	AC074091.13	-1.51825	0.035472
ENSG00000213626	LBH	-1.63581	1.95e-45
ENSG00000163171	CDC42EP3	-1.85331	9.04e-50
ENSG00000229692	SOS1-IT1	-1.01055	0.00542707
ENSG00000152154	TMEM178A	1.82491	0.00254871
ENSG00000183023	SLC8A1	-1.09427	0.00971923
ENSG00000234362	AC104654.2	-1.79049	0.00019
ENSG00000162878	PKDCC	-1.5123	5.75e-41
ENSG00000239332	LINC01119	-1.84451	2.09e-05
ENSG00000119888	EPCAM	1.24902	5.6e-14
ENSG00000233230	AC079807.2	1.22482	0.00277098
ENSG00000214595	EML6	-1.02046	3.02e-05
ENSG00000233251	AC007743.1	-2.69334	0.0118316
ENSG00000225889	AC074289.1	2.75575	0.0124587
ENSG00000204929	AC074391.1	3.74008	2.98e-06
ENSG00000188687	SLC4A5	2.17614	1.35e-11
ENSG00000204843	DCTN1	-1.26673	1.34e-10
ENSG00000258821	AC005041.17	3.11166	0.00298902
ENSG00000257702	LBX2-AS1	1.01246	6.2e-08
ENSG00000115297	TLX2	-1.69508	0.0393972
ENSG00000144045	DQX1	2.12283	0.00104527
ENSG00000115318	LOXL3	1.62633	0.00485245
ENSG00000115363	EVA1A	-1.93706	4.59e-06
ENSG00000115423	DNAH6	1.66707	0.000152
ENSG00000118640	VAMP8	1.20754	1.92e-19
ENSG00000153563	CD8A	2.03329	1.37e-05
ENSG00000155066	PROM2	2.19211	0.00228636
ENSG00000115085	ZAP70	3.69094	0.000576
ENSG00000273045	C2ORF15	-1.18074	0.0275494
ENSG00000170485	NPAS2	-1.12193	8.67e-24
ENSG00000175874	CREG2	-1.58049	0.000571
ENSG00000115590	IL1R2	1.1674	0.00122929
ENSG00000144057	ST6GAL2	-2.93021	2.46e-70
ENSG00000238250	ST6GAL2-IT1	-1.44388	0.0238629
ENSG00000198203	SULT1C2	-1.29976	0.0181673
ENSG00000135960	EDAR	-5.33188	3.33e-16
ENSG00000230650	AC112229.1	-1.51357	3.81e-09
ENSG00000153094	BCL2L11	-1.5762	1.42e-34
ENSG00000144152	FBLN7	-1.45792	0.00229336
ENSG00000125538	IL1B	3.07282	0.000223
ENSG00000189223	PAX8-AS1	-1.09517	0.000536
ENSG00000227359	AC017074.2	1.64375	0.02355
ENSG00000171227	TMEM37	-1.00421	1.81e-05
ENSG00000231013	AC013275.2	-4.29081	1.52e-05
ENSG00000074047	GLI2	-1.58511	2.85e-24
ENSG00000271709	RP11-297J22.1	-3.64913	0.000786
ENSG00000213239	NPM1P32	1.77467	1.45e-07
ENSG00000186684	CYP27C1	-3.24738	1.83e-20
ENSG00000236682	AC068282.3	-1.16916	0.000851
ENSG00000169994	MYO7B	1.62608	7.42e-05
ENSG00000072163	LIMS2	-1.10428	5.55e-05
ENSG00000150551	LYPD1	-2.31954	5.56e-07
ENSG00000176771	NCKAP5	-2.36991	3.18e-15
ENSG00000226953	AC010890.1	-1.22636	0.0484971
ENSG00000227347	HNRNPKP2	-2.35975	2.27e-22
ENSG00000150540	HNMT	-1.16257	1.63e-05
ENSG00000169554	ZEB2	-4.86172	7.25e-16
ENSG00000226674	TEX41	-5.13407	1.75e-28
ENSG00000168280	KIF5C	-1.25322	0.00139759
ENSG00000187123	LYPD6	-2.19679	2.43e-07
ENSG00000123610	TNFAIP6	-2.33821	1.25e-06
ENSG00000157827	FMNL2	-1.06679	3.03e-20
ENSG00000177917	ARL6IP6	-1.03006	7.65e-06
ENSG00000144278	GALNT13	-1.31487	2.33e-17
ENSG00000115221	ITGB6	-3.30396	7.3e-35
ENSG00000153253	SCN3A	3.55642	4.63e-06
ENSG00000239467	AC007405.6	2.51538	0.0115108
ENSG00000115844	DLX2	1.30555	0.0480229
ENSG00000231453	AC018470.4	-1.6621	0.00212422
ENSG00000226853	AC010894.3	1.29969	0.0144015
ENSG00000115935	WIPF1	-1.43177	1.03e-32
ENSG00000237380	HOXD-AS2	1.07718	0.00140814
ENSG00000224189	HOXD-AS1	1.37567	0.0285056
ENSG00000128645	HOXD1	2.06836	0.00277644
ENSG00000224577	LINC01117	1.93811	0.000803
ENSG00000222043	AC079305.10	1.04193	0.0480231
ENSG00000270956	RP11-65L3.4	-1.70042	0.0297156
ENSG00000188452	CERKL	-1.48037	0.0213543
ENSG00000150722	PPP1R1C	1.731	0.00715463
ENSG00000115252	PDE1A	-3.06273	1.77e-19
ENSG00000064989	CALCRL	2.46422	5.93e-06
ENSG00000187699	C2orf88	1.64738	0.000104
ENSG00000272979	RP11-647K16.1	2.39334	0.000853
ENSG00000144339	TMEFF2	2.30557	4.78e-11
ENSG00000187944	C2orf66	2.87862	0.000526
ENSG00000138356	AOX1	-2.51388	5.87e-11
ENSG00000163596	ICA1L	-1.03642	4.16e-07
ENSG00000138380	CARF	-1.10397	9.97e-08
ENSG00000118257	NRP2	-1.94486	5.57e-72
ENSG00000180672	AC007362.1	-1.59551	7.3e-24
ENSG00000138400	MDH1B	-1.59538	0.000324
ENSG00000144410	CPO	2.74159	0.00382991
ENSG00000118263	KLF7	-1.43651	2.82e-29
ENSG00000229267	AC072062.1	1.95656	0.0182607
ENSG00000115414	FN1	-1.99275	9.07e-85
ENSG00000144583	2020-03-04	-5.06908	4.41e-64
ENSG00000115461	IGFBP5	-2.11726	6.36e-09
ENSG00000273361	RP11-378A13.2	1.80482	0.0492125
ENSG00000127831	VIL1	1.95191	0.0166318
ENSG00000273466	RP11-548H3.1	1.64637	5.54e-13
ENSG00000115596	WNT6	1.97107	2.76e-08
ENSG00000181378	CCDC108	1.57206	0.0324543
ENSG00000213901	SLC23A3	2.07385	1.68e-11
ENSG00000115657	ABCB6	1.3572	3.54e-17
ENSG00000229525	AC053503.4	1.95758	0.0343
ENSG00000175084	DES	3.66431	0.0067731
ENSG00000123999	INHA	1.08008	0.00337933
ENSG00000116106	EPHA4	-2.41011	3.4e-07
ENSG00000135919	SERPINE2	-1.80869	2.18e-58
ENSG00000135905	DOCK10	-1.59738	3.44e-14
ENSG00000169047	IRS1	-1.53646	6.7e-45
ENSG00000272622	RP11-395N3.2	-2.08813	0.027798
ENSG00000168955	TM4SF20	1.21636	0.0361889
ENSG00000135917	SLC19A3	1.03154	1.89e-11
ENSG00000115009	CCL20	4.40921	0.0107607
ENSG00000185404	SP140L	1.2643	0.000834
ENSG00000238062	SPATA3-AS1	1.86717	0.000301
ENSG00000171551	ECEL1	-1.36738	0.046065
ENSG00000066248	NGEF	-1.52617	1.93e-26
ENSG00000244122	UGT1A7	-1.39128	2.01e-05
ENSG00000167165	UGT1A6	-1.77832	1.8e-06
ENSG00000228445	UGT1A2P	-1.87862	0.0191511
ENSG00000185038	MROH2A	-1.39125	0.000301
ENSG00000188042	ARL4C	-1.47712	3.71e-09
ENSG00000144476	ACKR3	-3.8453	3.04e-48
ENSG00000124839	RAB17	2.45057	0.000231
ENSG00000168427	KLHL30	2.95831	9.2e-06
ENSG00000178752	FAM132B	-1.49839	3.1e-13
ENSG00000178623	GPR35	1.42728	0.00194278
ENSG00000130294	KIF1A	-1.24502	0.0133242
ENSG00000162804	SNED1	-1.15807	0.00132671
ENSG00000146205	ANO7	-1.10414	0.00315166
ENSG00000204099	NEU4	2.65594	1.22e-10
ENSG00000101255	TRIB3	1.27534	5.39e-32
ENSG00000101276	SLC52A3	1.15195	3.34e-05
ENSG00000198053	SIRPA	-1.02178	7.95e-20
ENSG00000226644	RP11-128M1.1	1.54599	0.000422
ENSG00000251806	SNORD119	1.90271	0.00892291
ENSG00000125787	GNRH2	1.72887	0.0363726
ENSG00000230176	RP4-779E11.3	1.41719	0.0195137
ENSG00000101265	RASSF2	-1.71261	1.28e-53
ENSG00000101323	HAO1	1.28842	0.00253514
ENSG00000227906	SNAP25-AS1	-2.03684	0.000486
ENSG00000232448	RP11-416N4.1	-1.86859	0.00811345
ENSG00000132639	SNAP25	-2.22893	2.38e-77
ENSG00000172296	SPTLC3	1.01401	0.0146066
ENSG00000125850	OVOL2	2.17129	0.0234099
ENSG00000212232	SNORD17	1.22026	3.24e-07
ENSG00000233895	RP1-122P22.2	-1.32786	0.0453019
ENSG00000178726	THBD	-1.81047	6.69e-15
ENSG00000232645	RP3-322G13.5	1.19855	0.000452
ENSG00000101463	SYNDIG1	-1.83505	0.000839
ENSG00000175170	FAM182B	1.98485	0.0129272
ENSG00000101306	MYLK2	-1.89783	0.0021867
ENSG00000179772	FOXS1	-4.32063	2.38e-18
ENSG00000235217	TSPY26P	2.52206	5.11e-05
ENSG00000198547	C20orf203	3.57412	0.000612
ENSG00000260257	RP5-1085F17.3	1.32659	5.31e-05
ENSG00000125999	BPIFB1	-1.71305	6.3e-05
ENSG00000078814	MYH7B	1.38008	0.00531977
ENSG00000101000	PROCR	1.2319	2.57e-31
ENSG00000126005	MMP24-AS1	1.27866	3.35e-07
ENSG00000088340	FER1L4	-1.77286	6.06e-09
ENSG00000061656	SPAG4	1.17971	4.12e-10
ENSG00000132821	VSTM2L	1.5266	0.0155899
ENSG00000201512	SNORA71C	1.84298	0.000462
ENSG00000101445	PPP1R16B	-1.27442	6.5e-06
ENSG00000101049	SGK2	1.38883	5.5e-11
ENSG00000101074	R3HDML	-6.52741	1.03e-21
ENSG00000132832	RP11-445H22.3	1.97376	0.0468293
ENSG00000064205	WISP2	-1.13339	5.26e-06
ENSG00000101098	RIMS4	1.35183	6.26e-10
ENSG00000124102	PI3	1.89179	0.00927907
ENSG00000124107	SLPI	2.44623	0.000657
ENSG00000124159	MATN4	2.26919	0.00906952
ENSG00000244274	DBNDD2	1.43476	0.000857
ENSG00000100985	MMP9	2.30337	0.00101817
ENSG00000101017	CD40	1.58889	8.19e-16
ENSG00000196562	SULF2	-1.34397	2.15e-05
ENSG00000124126	PREX1	-2.38343	6.61e-63
ENSG00000177410	ZFAS1	1.2032	7.42e-10
ENSG00000158445	KCNB1	1.21393	0.0119234
ENSG00000231742	RP11-112L6.4	1.19217	1.04e-11
ENSG00000203999	RP11-290F20.1	-1.78987	1.64e-22
ENSG00000042062	FAM65C	3.96855	0.000274
ENSG00000259456	RP5-914P20.5	-1.9985	0.0366272
ENSG00000101096	NFATC2	-1.25977	3.46e-08
ENSG00000019186	CYP24A1	-1.6893	2.58e-60
ENSG00000101134	DOK5	3.63837	0.0108696
ENSG00000087589	CASS4	3.0478	0.016046
ENSG00000124103	FAM209A	1.59179	0.00774693
ENSG00000213714	FAM209B	2.28922	2.38e-06
ENSG00000124092	CTCFL	4.33907	0.000643
ENSG00000124225	PMEPA1	-3.34003	8.74e-198
ENSG00000124215	CDH26	1.20354	0.00577186
ENSG00000179242	CDH4	-3.58853	1.57e-108
ENSG00000225978	HAR1A	1.91164	0.00277644
ENSG00000101198	NKAIN4	-5.30929	7.85e-57
ENSG00000101203	COL20A1	-3.20332	3.24e-19
ENSG00000258366	RTEL1	1.04249	0.0470714
ENSG00000026036	RTEL1-TNFRSF6B	2.39585	1.24e-27
ENSG00000197114	ZGPAT	1.3679	1.18e-19
ENSG00000207554	MIR647	1.15772	0.0201119
ENSG00000264462	MIR3648	2.92554	0.0424704
ENSG00000154734	ADAMTS1	2.18759	0.00652895
ENSG00000232079	AL035610.1	3.54081	0.0457618
ENSG00000142149	HUNK	-1.67126	1.07e-16
ENSG00000166979	EVA1C	-1.18382	2.02e-23
ENSG00000186842	LINC00846	1.81468	0.000771
ENSG00000272659	AP000295.10	2.26954	5.65e-06
ENSG00000236830	CBR3-AS1	-1.43543	0.0136772
ENSG00000142197	DOPEY2	-1.07815	1.44e-13
ENSG00000230479	AP000695.6	-4.49041	1.44e-05
ENSG00000233818	AP000695.4	-3.34583	3.38e-10
ENSG00000159263	SIM2	-1.91916	4.92e-44
ENSG00000157542	KCNJ6	-1.86191	1.75e-11
ENSG00000157557	ETS2	-1.17875	5.91e-25
ENSG00000185437	SH3BGR	1.15155	0.00180677
ENSG00000183778	B3GALT5	-1.02166	0.000575
ENSG00000160182	TFF1	-2.43273	5.04e-13
ENSG00000237864	LINC00322	-2.15729	2.94e-10
ENSG00000142185	TRPM2	1.1337	1.23e-06
ENSG00000235890	TSPEAR-AS1	1.47077	8.95e-05
ENSG00000182912	C21orf90	2.00762	9.87e-13
ENSG00000236519	AL773604.8	1.49022	0.0455701
ENSG00000160255	ITGB2	-1.92665	2.43e-09
ENSG00000182871	COL18A1	-1.7672	4.54e-22
ENSG00000237438	CECR7	1.54225	1.59e-13
ENSG00000273311	DGCR11	1.60639	1.77e-05
ENSG00000070371	CLTCL1	-1.09903	1.42e-12
ENSG00000215012	C22orf29	-1.32298	2.66e-11
ENSG00000183773	AIFM3	1.28016	1.09e-11
ENSG00000099957	P2RX6	2.19612	0.0038851
ENSG00000128266	GNAZ	-1.39382	9.87e-07
ENSG00000215478	CES5AP1	-3.25999	5e-08
ENSG00000234928	AP000344.3	-1.52672	0.00209687
ENSG00000227755	AP000344.4	-1.7966	0.00133197
ENSG00000099953	MMP11	-1.44746	0.00645635
ENSG00000232545	KB-318B8.7	-2.35497	0.0332978
ENSG00000100024	UPB1	4.83722	1.26e-05
ENSG00000215481	BCRP3	-1.94487	9.75e-14
ENSG00000167037	SGSM1	1.49255	2.05e-13
ENSG00000261188	CTA-445C9.14	-1.2909	2.65e-07
ENSG00000100219	XBP1	1.14269	3.75e-08
ENSG00000183762	KREMEN1	-1.03033	1.17e-14
ENSG00000186998	EMID1	-1.02773	0.0137548
ENSG00000100276	RASL10A	2.87298	3.79e-05
ENSG00000273216	AC002059.10	5.37842	2.6e-08
ENSG00000239127	SNORD125	1.15135	0.0397926
ENSG00000225774	SIRPAP1	-1.84223	7.09e-11
ENSG00000185339	TCN2	1.58604	6.5e-12
ENSG00000100234	TIMP3	-3.59623	2.31e-07
ENSG00000133424	LARGE	-1.28894	1.36e-07
ENSG00000100292	HMOX1	-2.16048	8.52e-35
ENSG00000100302	RASD2	-1.65542	1.18e-08
ENSG00000128311	TST	-1.16034	1.13e-20
ENSG00000166897	ELFN2	-1.07502	3.93e-14
ENSG00000100060	MFNG	1.162	5.9e-09
ENSG00000100116	GCAT	1.14868	1.09e-08
ENSG00000184381	PLA2G6	1.44277	6.96e-05
ENSG00000228274	RP3-508I15.9	2.10022	0.000893
ENSG00000100311	PDGFB	-2.2381	2.82e-29
ENSG00000209482	SNORD83A	2.16157	1.09e-08
ENSG00000226085	UQCRFS1P1	1.08417	7.5e-14
ENSG00000172346	CSDC2	-2.52976	3.72e-06
ENSG00000237037	NDUFA6-AS1	1.07975	0.000257
ENSG00000205702	CYP2D7P	-1.13812	0.0465573
ENSG00000186976	EFCAB6	-1.14437	0.0318171
ENSG00000138944	KIAA1644	-2.79292	3.05e-09
ENSG00000241484	ARHGAP8	1.20098	0.0443697
ENSG00000128408	RIBC2	-1.04762	0.000285
ENSG00000235091	WI2-85898F10.1	5.68314	4.95e-05
ENSG00000197182	FLJ27365	1.12479	1.04e-07
ENSG00000075275	CELSR1	-1.03987	4.47e-20
ENSG00000128165	ADM2	1.11251	1.36e-05
ENSG00000025708	TYMP	-1.9033	7.71e-18
ENSG00000134121	CHL1	-5.02056	3.66e-06
ENSG00000235978	AC018816.3	-1.58448	0.0204282
ENSG00000134109	EDEM1	-1.08364	3.66e-13
ENSG00000125046	SSUH2	1.46388	1.37e-05
ENSG00000187288	CIDEC	2.3373	0.00724328
ENSG00000186162	CIDECP	1.06961	2.85e-09
ENSG00000244502	HDAC11-AS1	2.37349	0.0220189
ENSG00000154767	XPC	-1.47395	3.42e-38
ENSG00000131389	SLC6A6	-1.04762	2.33e-23
ENSG00000131379	C3orf20	1.86923	0.00724472
ENSG00000224660	SH3BP5-AS1	1.3859	2.91e-10
ENSG00000206561	COLQ	1.96408	7.21e-21
ENSG00000131378	RFTN1	-2.02543	4.74e-15
ENSG00000197385	ZNF860	-1.54638	0.00138396
ENSG00000144681	STAC	-2.41184	4.66e-10
ENSG00000168016	TRANK1	1.05552	0.0163116
ENSG00000198590	C3orf35	1.26813	0.0356375
ENSG00000144677	CTDSPL	-1.33034	2.04e-28
ENSG00000183873	SCN5A	-1.50956	0.00064
ENSG00000261786	RP4-555D20.2	-1.32216	5.7e-08
ENSG00000272077	RP11-348P10.2	1.41591	0.00104829
ENSG00000163814	CDCP1	-1.0576	3.63e-08
ENSG00000249992	TMEM158	-1.28669	0.0192293
ENSG00000178038	ALS2CL	1.55796	2.5e-05
ENSG00000227398	KIF9-AS1	1.04385	7.26e-05
ENSG00000114270	COL7A1	-1.08238	2.27e-06
ENSG00000178467	P4HTM	-1.36332	2.82e-29
ENSG00000114378	HYAL1	2.97942	0.0249228
ENSG00000088538	DOCK3	1.33627	1.63e-08
ENSG00000243224	RP5-1157M23.2	1.50696	0.000115
ENSG00000168237	GLYCTK	1.71424	3.98e-16
ENSG00000010319	SEMA3G	1.2603	0.0423963
ENSG00000114854	TNNC1	1.74314	0.0122238
ENSG00000163932	PRKCD	1.08431	1.45e-21
ENSG00000114251	WNT5A	-1.69921	0.0002
ENSG00000144730	IL17RD	-1.01905	2.54e-06
ENSG00000189283	FHIT	1.88099	0.000157
ENSG00000163638	ADAMTS9	-1.11724	6.99e-10
ENSG00000187098	MITF	-1.10391	1.14e-15
ENSG00000170837	GPR27	1.2001	3.88e-09
ENSG00000244026	FAM86DP	-1.13872	2.89e-09
ENSG00000242516	LINC00960	1.51364	0.00270353
ENSG00000169855	ROBO1	2.39048	0.0359862
ENSG00000175161	CADM2	-3.89669	6.82e-05
ENSG00000206538	VGLL3	-1.85766	2.5e-17
ENSG00000243547	HNRNPKP4	-2.35621	2.11e-38
ENSG00000064225	ST3GAL6	1.13452	2.61e-05
ENSG00000273488	RP11-114I8.4	1.59879	0.0387543
ENSG00000181458	TMEM45A	1.76766	0.000435
ENSG00000244119	PDCL3P4	1.64961	0.000221
ENSG00000144802	NFKBIZ	-1.12447	3.83e-08
ENSG00000114455	HHLA2	2.69041	0.00247173
ENSG00000241634	RP11-381E24.1	-1.37479	0.036922
ENSG00000177494	ZBED2	-2.79458	0.00592521
ENSG00000272761	RP11-572C15.6	-3.2971	5.12e-71
ENSG00000091986	CCDC80	-2.91968	2.69e-146
ENSG00000144857	BOC	-1.08148	2.46e-06
ENSG00000206530	WDR52	-1.01025	0.000233
ENSG00000072858	SIDT1	-1.65471	1.14e-10
ENSG00000178075	GRAMD1C	1.6721	4.94e-07
ENSG00000185565	LSAMP	-2.32916	4.51e-08
ENSG00000144847	IGSF11	-1.04217	1.17e-12
ENSG00000031081	ARHGAP31	1.42921	2.92e-07
ENSG00000144843	ADPRH	1.80717	3.28e-21
ENSG00000144837	PLA1A	1.01234	0.0485428
ENSG00000183833	MAATS1	3.65421	1.36e-14
ENSG00000175697	GPR156	1.53167	0.0269712
ENSG00000113924	HGD	1.03543	0.00691739
ENSG00000121552	CSTA	2.70291	0.000966
ENSG00000173702	MUC13	1.68422	0.0315558
ENSG00000171084	FAM86JP	-2.02382	4.05e-16
ENSG00000144908	ALDH1L1	-1.44538	0.000118
ENSG00000004399	PLXND1	-1.3806	9.84e-31
ENSG00000253540	FAM86HP	-1.79601	0.0031851
ENSG00000114670	NEK11	-1.05981	1.34e-06
ENSG00000246082	NUDT16P1	-3.62556	2.72e-07
ENSG00000260633	RP11-375I20.6	2.62848	0.000147
ENSG00000158220	ESYT3	1.43722	1.12e-07
ENSG00000114120	SLC25A36	1.05973	1.72e-21
ENSG00000155903	RASA2	-1.03528	6.48e-08
ENSG00000144935	TRPC1	-1.16577	1.18e-08
ENSG00000163710	PCOLCE2	1.08013	1.17e-17
ENSG00000181804	SLC9A9	2.67642	5.45e-05
ENSG00000114698	PLSCR4	-1.01351	7.73e-10
ENSG00000144891	AGTR1	-1.55796	7.53e-13
ENSG00000240541	TM4SF1-AS1	-2.48072	2.01e-13
ENSG00000240137	RP11-103G8.2	1.11722	0.00031
ENSG00000198829	SUCNR1	-3.02641	2.49e-13
ENSG00000243069	ARHGEF26-AS1	1.83535	0.0046507
ENSG00000272990	RP11-305K5.1	1.22524	0.0166056
ENSG00000174899	C3orf55	2.86954	4.65e-13
ENSG00000250588	IQCJ-SCHIP1	1.02309	0.0228646
ENSG00000168811	IL12A	1.31377	0.0114811
ENSG00000180044	C3orf80	-1.01464	0.00284019
ENSG00000244128	RP11-85M11.2	-1.68207	0.00137045
ENSG00000163536	SERPINI1	2.81056	1.14e-13
ENSG00000085276	MECOM	-2.49086	0.00171211
ENSG00000136603	SKIL	-1.13544	0.000213
ENSG00000180834	MAP6D1	-1.0306	0.00113669
ENSG00000272970	RP11-329B9.4	1.51522	0.0283326
ENSG00000073282	TP63	-1.85628	9.84e-31
ENSG00000180611	MB21D2	1.83442	1.19e-35
ENSG00000214145	LINC00887	-1.82751	1.11e-11
ENSG00000189058	APOD	1.37159	0.000517
ENSG00000225770	AC092933.3	1.12772	0.00823358
ENSG00000174007	CEP19	-1.11097	1.72e-06
ENSG00000228109	MFI2-AS1	1.29215	5.32e-10
ENSG00000250312	ZNF718	-1.13749	0.00566761
ENSG00000127419	TMEM175	1.09101	2.03e-15
ENSG00000145214	DGKQ	1.08037	7.66e-19
ENSG00000178222	RNF212	1.5229	0.000688
ENSG00000159674	SPON2	-2.51827	9.87e-05
ENSG00000218422	AC016773.1	1.52737	0.000124
ENSG00000251669	FAM86EP	-1.15245	0.000223
ENSG00000072840	EVC	-1.20514	3.79e-20
ENSG00000072832	CRMP1	-1.78559	2.43e-09
ENSG00000251580	RP11-539L10.3	-1.21002	0.00398628
ENSG00000184985	SORCS2	-2.56253	9.59e-12
ENSG00000170801	HTRA3	-5.64557	5.76e-24
ENSG00000087008	ACOX3	-1.67356	1.45e-18
ENSG00000205959	RP11-689P11.2	1.68609	0.00499466
ENSG00000002587	HS3ST1	-2.23313	1.26e-18
ENSG00000109705	NKX3-2	-1.75058	0.0117502
ENSG00000109680	TBC1D19	-1.2176	2.68e-06
ENSG00000047365	ARAP2	-1.71426	6.75e-06
ENSG00000134962	KLB	2.33652	0.00995641
ENSG00000124406	ATP8A1	-1.42108	0.000127
ENSG00000145246	ATP10D	1.14344	1.46e-13
ENSG00000145248	SLC10A4	1.00918	1.26e-08
ENSG00000188993	LRRC66	1.73689	0.00178945
ENSG00000163069	SGCB	-1.06976	3.3e-12
ENSG00000109265	KIAA1211	-1.22224	3.1e-07
ENSG00000163453	IGFBP7	-2.28452	6.78e-82
ENSG00000162840	MT2P1	-1.87646	2.49e-06
ENSG00000196620	UGT2B15	-1.58119	0.0138498
ENSG00000213759	UGT2B11	-2.34916	0.00631285
ENSG00000163737	PF4	1.99877	3.18e-05
ENSG00000174792	C4orf26	3.71907	0.000416
ENSG00000138759	FRAS1	-1.11769	2.3e-14
ENSG00000173083	HPSE	1.19832	8.37e-10
ENSG00000163629	PTPN13	-1.19397	3.01e-20
ENSG00000198189	HSD17B11	1.34685	9.05e-38
ENSG00000170502	NUDT9	1.80235	1.06e-58
ENSG00000118762	PKD2	-1.40988	2.97e-09
ENSG00000182168	UNC5C	7.03168	2.92e-12
ENSG00000271474	RP11-710C12.1	4.97391	1.45e-05
ENSG00000168785	TSPAN5	-1.30439	1.46e-08
ENSG00000138823	MTTP	4.2595	0.0281513
ENSG00000155016	CYP2U1	-1.05876	8.88e-06
ENSG00000164089	ETNPPL	1.78708	0.00374984
ENSG00000205403	CFI	3.34342	1.46e-15
ENSG00000138798	EGF	3.06411	5.58e-14
ENSG00000138792	ENPEP	1.91685	4.23e-07
ENSG00000145362	ANK2	1.42779	2.13e-10
ENSG00000180801	ARSJ	-1.07543	6.04e-10
ENSG00000174599	TRAM1L1	1.30667	6.8e-06
ENSG00000269893	SNHG8	1.45613	0.000857
ENSG00000164099	PRSS12	3.364	0.0169233
ENSG00000225892	RP11-384K6.2	1.43794	4.89e-05
ENSG00000172403	SYNPO2	1.14347	0.0179433
ENSG00000138735	PDE5A	-1.20319	0.00118291
ENSG00000164056	SPRY1	1.01361	6.9e-07
ENSG00000138650	PCDH10	-4.2907	3.33e-09
ENSG00000085871	MGST2	1.07846	5.29e-06
ENSG00000196951	RP11-425I13.3	1.62831	0.000268
ENSG00000109452	INPP4B	-1.03873	9.58e-07
ENSG00000248890	HHIP-AS1	-1.8972	1.21e-05
ENSG00000164161	HHIP	-4.02557	3.21e-29
ENSG00000270681	RP11-372K14.2	2.3061	0.0371452
ENSG00000171564	FGB	1.39455	0.0126597
ENSG00000171560	FGA	2.49687	0.0153369
ENSG00000171557	FGG	2.36838	0.0027453
ENSG00000121207	LRAT	1.79808	0.00286104
ENSG00000250538	RP11-92A5.2	1.97112	0.0381414
ENSG00000185149	NPY2R	2.15095	0.00401819
ENSG00000061918	GUCY1B3	2.83189	0.028538
ENSG00000109472	CPE	3.05348	3.3e-06
ENSG00000196104	SPOCK3	-4.85672	4.01e-11
ENSG00000174473	GALNTL6	-2.51155	8.55e-12
ENSG00000250708	RP11-161D15.1	2.44633	0.0137872
ENSG00000164120	HPGD	-1.59489	2.42e-46
ENSG00000150625	GPM6A	6.31237	0.000516
ENSG00000150630	VEGFC	1.16356	0.000179
ENSG00000225356	RP11-433O3.1	1.34216	0.0477743
ENSG00000218336	TENM3	-1.44622	1.29e-16
ENSG00000164342	TLR3	2.09826	0.0112031
ENSG00000179046	TRIML2	1.16943	0.000535
ENSG00000249378	LINC01060	2.28715	0.00158129
ENSG00000171368	TPPP	-1.62016	2.71e-19
ENSG00000271781	CTD-2589H19.6	1.52947	0.0262858
ENSG00000206077	ZDHHC11B	-1.02509	0.00726516
ENSG00000071539	TRIP13	-1.26718	2.71e-07
ENSG00000215246	RP11-43F13.3	1.72704	0.0312388
ENSG00000145536	ADAMTS16	-1.02044	0.0192224
ENSG00000145545	SRD5A1	-1.63997	4.8e-17
ENSG00000272520	CTD-2044J15.2	-1.2194	3.13e-07
ENSG00000145491	ROPN1L	-2.42741	0.000447
ENSG00000039139	DNAH5	-1.40015	1.12e-08
ENSG00000038382	TRIO	-1.107	8.1e-18
ENSG00000145569	FAM105A	-1.60119	7.87e-15
ENSG00000261360	CTD-2165H16.4	-2.09175	0.0337016
ENSG00000183580	FBXL7	-1.51102	0.010804
ENSG00000215196	AC091878.1	-1.17231	0.00211994
ENSG00000040731	CDH10	-2.0945	0.0160226
ENSG00000113361	CDH6	-4.97971	1.01e-45
ENSG00000113389	NPR3	-2.05559	5.21e-28
ENSG00000039560	RAI14	-1.65244	1.32e-50
ENSG00000082074	FYB	1.42235	0.0349876
ENSG00000251215	GOLGA5P1	14.2006	1.19e-06
ENSG00000249668	KRT18P56	1.72397	0.0230538
ENSG00000171522	PTGER4	-1.42042	0.00121332
ENSG00000182836	PLCXD3	-2.00326	4e-19
ENSG00000083720	OXCT1	-1.86094	5.54e-06
ENSG00000151876	FBXO4	-1.22698	7.27e-12
ENSG00000250722	SEPP1	4.43651	1.1e-60
ENSG00000112972	HMGCS1	-1.01471	3.66e-20
ENSG00000188850	RP11-159F24.2	-2.40534	0.0142527
ENSG00000170571	EMB	-2.11857	1.62e-05
ENSG00000213949	ITGA1	1.44321	0.0272861
ENSG00000164171	ITGA2	-1.51198	1.13e-07
ENSG00000134363	FST	-2.01898	2.82e-26
ENSG00000152931	PART1	-5.36152	3.99e-08
ENSG00000145700	ANKRD31	1.97154	3.54e-05
ENSG00000164220	F2RL2	2.19156	8.86e-52
ENSG00000113231	PDE8B	-1.43272	7.23e-21
ENSG00000164309	CMYA5	2.38322	8.23e-09
ENSG00000113296	THBS4	3.41	0.000725
ENSG00000113319	RASGRF2	-2.51525	0.000668
ENSG00000038427	VCAN	-6.28298	4.29e-234
ENSG00000185261	KIAA0825	-2.23039	0.0155553
ENSG00000246763	RGMB-AS1	1.90978	0.00176841
ENSG00000173930	SLCO4C1	1.75719	0.0192293
ENSG00000270067	CTC-487M23.5	1.85669	0.000462
ENSG00000145779	TNFAIP8	-1.36783	1.38e-25
ENSG00000250328	CTC-210G5.1	1.86254	0.00061
ENSG00000061455	PRDM6	1.57825	0.00105333
ENSG00000235275	KRT18P16	1.16653	0.00945131
ENSG00000250859	HNRNPKP1	-2.06214	7.84e-08
ENSG00000138829	FBN2	-1.81285	2.28e-12
ENSG00000053108	FSTL4	-2.64714	3.1e-47
ENSG00000081059	TCF7	-1.31417	7.42e-13
ENSG00000270021	CTC-203F4.2	2.40748	0.00462431
ENSG00000164616	FBXL21	1.17736	1.08e-06
ENSG00000152377	SPOCK1	-4.72514	2.19e-110
ENSG00000120725	SIL1	1.05266	1.14e-10
ENSG00000184584	TMEM173	1.21021	0.0300095
ENSG00000171604	CXXC5	-1.40496	4.07e-32
ENSG00000245146	LINC01024	1.29698	2.55e-05
ENSG00000182700	IGIP	-1.05825	3.2e-05
ENSG00000113070	HBEGF	1.45998	1.38e-09
ENSG00000170458	CD14	1.16623	0.00982407
ENSG00000204970	PCDHA1	2.12716	3.87e-10
ENSG00000204965	PCDHA5	1.14066	6.4e-05
ENSG00000113209	PCDHB5	2.01184	5.56e-16
ENSG00000255622	PCDHB17	2.47377	0.000864
ENSG00000120322	PCDHB8	1.56937	0.000121
ENSG00000196963	PCDHB16	2.08851	7.32e-07
ENSG00000187372	PCDHB13	1.8279	0.000205
ENSG00000120327	PCDHB14	1.51114	0.00181564
ENSG00000204956	PCDHGA1	1.44265	0.000589
ENSG00000081853	PCDHGA2	1.84405	4.12e-05
ENSG00000262576	PCDHGA4	1.63381	0.0214853
ENSG00000169302	STK32A	-3.01838	5.42e-07
ENSG00000113657	DPYSL3	-1.63862	0.0259734
ENSG00000169247	SH3TC2	2.08549	0.0160497
ENSG00000145882	PCYOX1L	-1.1208	9.51e-14
ENSG00000164591	MYOZ3	2.22257	0.0311629
ENSG00000211445	GPX3	1.1305	0.0329921
ENSG00000113140	SPARC	-2.92912	3.44e-17
ENSG00000113249	HAVCR1	-1.14088	2.84e-21
ENSG00000135074	ADAM19	-1.18762	2.48e-15
ENSG00000172548	NIPAL4	-1.94785	1.2e-20
ENSG00000039600	SOX30	3.84575	0.00119046
ENSG00000170231	FABP6	2.82918	1.41e-07
ENSG00000221886	C5orf54	-1.57933	6.47e-10
ENSG00000184347	SLIT3	-1.0446	0.0181982
ENSG00000134516	DOCK2	-5.54462	5.83e-30
ENSG00000214357	NEURL1B	-1.0699	2.08e-12
ENSG00000184845	DRD1	-1.92345	0.00116355
ENSG00000113763	UNC5A	-1.64329	0.022157
ENSG00000249684	RP11-423H2.3	1.6825	0.0371932
ENSG00000161021	MAML1	-1.00505	1.63e-16
ENSG00000230438	RP11-420G6.4	-1.59539	0.0292709
ENSG00000272142	RP11-428J1.5	-2.39061	0.000314
ENSG00000124785	NRN1	1.72114	0.00113025
ENSG00000153162	BMP6	-1.79881	3.49e-30
ENSG00000180537	RNF182	-4.02008	1.84e-06
ENSG00000218073	RP1-13D10.2	2.57755	0.00128119
ENSG00000187837	HIST1H1C	1.87915	9.18e-06
ENSG00000196966	HIST1H3E	1.58519	2.52e-05
ENSG00000158406	HIST1H4H	1.34001	0.00608495
ENSG00000261584	RP11-457M11.5	1.7798	0.0310575
ENSG00000197903	HIST1H2BK	1.20836	4.57e-25
ENSG00000158553	POM121L2	2.03424	0.0216288
ENSG00000124613	ZNF391	1.05944	0.00468081
ENSG00000272009	RP1-313I6.12	1.65301	0.00911702
ENSG00000269293	ZSCAN16-AS1	1.0242	4.11e-07
ENSG00000226314	ZNF192P1	1.95719	0.000143
ENSG00000204709	C6orf100	1.56587	0.00750801
ENSG00000227214	HCG15	1.48263	0.00382891
ENSG00000204642	HLA-F	1.16327	0.00772277
ENSG00000204616	TRIM31	3.39272	0.00798639
ENSG00000204614	TRIM40	2.95682	0.0123193
ENSG00000204613	TRIM10	2.22751	0.00325562
ENSG00000204610	TRIM15	3.6633	7.36e-06
ENSG00000204540	PSORS1C1	1.10099	6.65e-05
ENSG00000234745	HLA-B	1.08019	0.00210826
ENSG00000206337	HCP5	2.13109	0.0101962
ENSG00000213760	ATP6V1G2	1.19992	0.00333963
ENSG00000204394	VARS	1.27973	2.47e-21
ENSG00000204387	C6orf48	1.08734	9.57e-23
ENSG00000204386	NEU1	1.07504	8.66e-21
ENSG00000166278	C2	1.80805	0.000602
ENSG00000204366	ZBTB12	-1.26955	1.57e-08
ENSG00000204314	PRRT1	1.29205	1.17e-10
ENSG00000221988	PPT2	1.62913	7.42e-16
ENSG00000204257	HLA-DMA	1.29272	9.36e-12
ENSG00000231389	HLA-DPA1	5.02256	9.5e-06
ENSG00000272217	XXbac-BPG157A10.21	1.85287	0.00271322
ENSG00000096433	ITPR3	-1.07318	2.27e-23
ENSG00000124614	RPS10	1.44177	1.18e-12
ENSG00000124507	PACSIN1	-1.11571	0.00559981
ENSG00000124664	SPDEF	-1.15233	2.39e-05
ENSG00000272374	RP3-329A5.8	-1.9265	0.0140386
ENSG00000157343	ARMC12	1.29241	0.00016
ENSG00000196748	CLPSL2	1.15091	0.0487974
ENSG00000246982	RP1-179N16.6	2.4765	6.68e-10
ENSG00000124762	CDKN1A	1.14627	1.86e-26
ENSG00000112139	MDGA1	-2.99012	3.66e-53
ENSG00000164626	KCNK5	1.21163	2.88e-21
ENSG00000184106	TREML3P	2.24604	0.0335323
ENSG00000112599	GUCA1B	2.17439	0.000164
ENSG00000112624	GLTSCR1L	-1.18843	2.14e-14
ENSG00000231113	RP3-475N16.1	-1.41982	5.42e-05
ENSG00000204052	LRRC73	-1.95986	4.02e-05
ENSG00000271754	RP3-337H4.9	1.06385	0.00224604
ENSG00000001561	ENPP4	1.81965	1.4e-13
ENSG00000146233	CYP39A1	1.98843	8.64e-07
ENSG00000153291	SLC25A27	1.24863	5.53e-11
ENSG00000096006	CRISP3	4.7475	0.000685
ENSG00000244067	GSTA2	2.0322	0.00185084
ENSG00000243955	GSTA1	2.73008	0.00911151
ENSG00000202198	RN7SK	1.50031	0.000691
ENSG00000124749	COL21A1	-1.90418	1.72e-13
ENSG00000218274	RP3-407E4.3	3.40343	2.44e-19
ENSG00000266680	RP5-1148A21.3	1.87812	8.27e-10
ENSG00000236345	RP11-59D5__B.2	1.67867	0.0126189
ENSG00000112309	B3GAT2	3.78822	0.0020442
ENSG00000207827	MIR30A	11.6678	1.83e-36
ENSG00000181514	RP3-474G15.1	-1.47667	0.0347807
ENSG00000185760	KCNQ5	-2.58375	5.14e-06
ENSG00000118402	ELOVL4	1.83828	2.23e-19
ENSG00000146242	TPBG	2.02712	3.12e-09
ENSG00000146250	PRSS35	1.83614	0.0053386
ENSG00000135324	MRAP2	-1.28236	1.61e-08
ENSG00000135318	NT5E	-1.14504	2.22e-23
ENSG00000226524	RP1-102H19.8	2.06298	0.0177623
ENSG00000203871	C6orf164	1.66937	0.040574
ENSG00000118432	CNR1	-2.13889	0.00212904
ENSG00000135333	EPHA7	-5.40556	1.42e-15
ENSG00000164418	GRIK2	-5.86751	2.77e-16
ENSG00000057657	PRDM1	-2.73244	1.31e-31
ENSG00000112320	SOBP	-1.16465	0.00314983
ENSG00000135537	LACE1	1.02671	1.35e-05
ENSG00000203799	CCDC162P	1.55472	5.59e-14
ENSG00000185250	PPIL6	-1.02077	0.00184841
ENSG00000155111	CDK19	-1.35321	1.16e-24
ENSG00000112394	SLC16A10	1.19762	0.00025
ENSG00000272356	RP5-1112D6.8	1.38375	0.00852369
ENSG00000227502	RP1-249H1.4	1.56785	0.00288749
ENSG00000178033	FAM26E	4.118	0.00710485
ENSG00000164465	DCBLD1	-1.29908	7.26e-21
ENSG00000152661	GJA1	-1.22863	2.05e-23
ENSG00000256162	SMLR1	2.37127	0.0334231
ENSG00000118523	CTGF	1.03477	3.5e-19
ENSG00000206754	SNORD101	1.36324	0.033358
ENSG00000221500	SNORD100	1.50141	0.0010792
ENSG00000200534	SNORA33	1.64193	1.08e-06
ENSG00000118514	ALDH8A1	1.14672	0.0353579
ENSG00000118513	MYB	-1.74349	0.00616348
ENSG00000112379	KIAA1244	-1.46876	9.64e-22
ENSG00000164442	CITED2	1.03987	5.69e-06
ENSG00000135604	STX11	2.27874	7.29e-06
ENSG00000203727	SAMD5	-1.42762	7.42e-09
ENSG00000131015	ULBP2	1.0792	6.17e-05
ENSG00000111981	ULBP1	1.23995	4.64e-12
ENSG00000226193	RP3-398G3.5	-1.78624	0.00802383
ENSG00000029639	TFB1M	-1.26188	2.77e-09
ENSG00000078269	SYNJ2	-1.1492	8.61e-24
ENSG00000271913	RP1-111C20.4	2.05055	0.0299398
ENSG00000175003	SLC22A1	1.10679	0.0241818
ENSG00000026652	AGPAT4	1.01183	2.8e-12
ENSG00000112531	QKI	-1.00034	5.31e-13
ENSG00000266896	RP1-266L20.9	1.30027	0.0405294
ENSG00000198719	DLL1	1.31905	0.0313601
ENSG00000223855	AC147651.3	-1.09228	0.00403659
ENSG00000106003	LFNG	-2.05938	2.48e-13
ENSG00000198286	CARD11	-2.77934	5.7e-09
ENSG00000146555	SDK1	-3.894	1.15e-23
ENSG00000157927	RADIL	-1.12148	5.91e-06
ENSG00000236609	ZNF853	-1.33134	8.93e-11
ENSG00000006747	SCIN	-1.33542	0.00285301
ENSG00000048052	HDAC9	-1.21517	0.0196004
ENSG00000122691	TWIST1	-1.2901	0.0361409
ENSG00000105855	ITGB8	-2.01235	0.022471
ENSG00000105889	STEAP1B	2.45612	0.00387718
ENSG00000136235	GPNMB	1.15561	0.000121
ENSG00000273237	CTB-119C2.1	1.81409	0.000163
ENSG00000214870	AC004540.5	1.29458	0.00835539
ENSG00000105996	HOXA2	1.0445	0.00016
ENSG00000005073	HOXA11	1.19397	0.0436953
ENSG00000240990	HOXA11-AS	1.29104	0.00243717
ENSG00000176532	PRR15	-1.04826	0.0204356
ENSG00000180354	MTURN	-1.75612	4.27e-20
ENSG00000154678	PDE1C	-1.09606	2.16e-19
ENSG00000164619	BMPER	2.06621	2.96e-26
ENSG00000239556	AC004951.5	2.55383	0.00110809
ENSG00000232956	SNHG15	1.10074	4.43e-11
ENSG00000201772	SNORA5C	1.5648	0.00136919
ENSG00000272556	RP11-638I8.1	1.98656	5.15e-05
ENSG00000146678	IGFBP1	-2.40604	2.39e-54
ENSG00000146674	IGFBP3	-1.08772	1.04e-06
ENSG00000146666	LINC00525	-1.62177	0.042647
ENSG00000106070	GRB10	-1.11126	2.05e-17
ENSG00000146648	EGFR	-1.15677	1.86e-26
ENSG00000152926	ZNF117	-2.04515	1.26e-06
ENSG00000229180	GS1-124K5.11	1.32794	1.49e-09
ENSG00000158321	AUTS2	-1.6191	6.62e-05
ENSG00000225969	LINC00035	1.58871	0.000683
ENSG00000232415	CTB-51J22.1	-2.08612	0.00495518
ENSG00000086730	LAT2	2.01069	1.57e-09
ENSG00000205583	STAG3L1	1.12249	0.00887713
ENSG00000127946	HIP1	-1.15287	6.47e-26
ENSG00000243566	UPK3B	1.55579	1.93e-21
ENSG00000135205	CCDC146	1.18195	0.000525
ENSG00000075223	SEMA3C	-1.02555	4.85e-08
ENSG00000232019	AC074183.4	1.11123	0.0218783
ENSG00000085563	ABCB1	-2.4255	1.47e-07
ENSG00000105792	C7orf63	-1.28448	0.00105834
ENSG00000105810	CDK6	-1.18291	0.00110997
ENSG00000177409	SAMD9L	1.02516	0.00292559
ENSG00000272377	RP11-682N22.1	1.99523	6.94e-05
ENSG00000238228	OR7E7P	-1.81855	0.00315166
ENSG00000272782	RP4-607J23.2	2.05025	5.05e-05
ENSG00000244219	GS1-259H13.2	2.11788	5.89e-15
ENSG00000176402	GJC3	1.57312	0.025111
ENSG00000160862	AZGP1	2.61612	9.17e-07
ENSG00000214309	MBLAC1	1.13719	7.76e-05
ENSG00000205277	MUC12	-1.57865	0.00474844
ENSG00000227053	RP11-395B7.4	-1.70921	0.000895
ENSG00000260336	RP11-395B7.7	-1.27704	5.05e-18
ENSG00000106366	SERPINE1	-2.57974	5.9e-126
ENSG00000106384	MOGAT3	3.7678	2.44e-06
ENSG00000091137	SLC26A4	3.0974	8.03e-06
ENSG00000091129	NRCAM	-2.11366	6.11e-10
ENSG00000128573	FOXP2	2.13847	0.0370004
ENSG00000105967	TFEC	-2.53605	0.00133522
ENSG00000237813	AC002066.1	-1.95014	0.00148389
ENSG00000105971	CAV2	-1.0458	5.18e-08
ENSG00000008311	AASS	1.07492	0.0212351
ENSG00000224940	PRRT4	1.48802	0.00245002
ENSG00000240204	SMKR1	-1.25274	7.1e-09
ENSG00000128510	CPA4	1.93394	0.00708104
ENSG00000106484	MEST	1.04052	3.25e-20
ENSG00000233559	AC016831.7	-1.23003	0.00276867
ENSG00000128567	PODXL	-1.22082	7.8e-15
ENSG00000236281	AC093106.5	1.09685	0.0171279
ENSG00000221866	PLXNA4	-2.49229	0.00496921
ENSG00000155530	LRGUK	1.1567	0.0463074
ENSG00000272941	RP11-134L10.1	1.69207	0.0145338
ENSG00000105929	ATP6V0A4	1.80754	0.0228635
ENSG00000146966	DENND2A	-2.51561	2.37e-06
ENSG00000127366	TAS2R5	1.12811	0.00411362
ENSG00000257335	MGAM	-1.15624	4.09e-09
ENSG00000159763	PIP	-3.46345	0.000226
ENSG00000178826	TMEM139	1.25857	0.000202
ENSG00000159784	FAM131B	-2.40461	2.23e-11
ENSG00000174469	CNTNAP2	1.46295	0.042721
ENSG00000181652	ATG9B	1.42049	0.033831
ENSG00000244151	RP11-148K1.12	-2.41377	0.000879
ENSG00000239911	PRKAG2-AS1	1.57885	0.000127
ENSG00000253764	RP11-439C15.4	1.03471	0.0256751
ENSG00000183117	CSMD1	7.78366	6.12e-06
ENSG00000246089	RP11-115C21.2	1.17222	0.00403254
ENSG00000215374	FAM66B	1.38618	0.00546145
ENSG00000248538	RP11-10A14.5	2.86936	4.64e-05
ENSG00000183638	RP1L1	3.12677	0.00122021
ENSG00000171056	SOX7	-1.5621	0.00225733
ENSG00000154319	FAM167A	-1.37839	1.76e-24
ENSG00000186523	FAM86B1	-2.08302	5.02e-08
ENSG00000227888	FAM66A	1.17802	0.0294095
ENSG00000155970	MICU3	-1.04001	0.000269
ENSG00000253944	RP11-156K13.1	-1.18478	0.0223162
ENSG00000253671	RP11-806O11.1	-1.36243	2.42e-10
ENSG00000168453	HR	-1.72986	6.73e-18
ENSG00000008853	RHOBTB2	-1.00432	1.03e-09
ENSG00000134013	LOXL2	-2.339	5.37e-91
ENSG00000042980	ADAM28	2.94411	1.18e-07
ENSG00000272163	GS1-72M22.1	2.54567	0.00314208
ENSG00000104725	NEFL	1.64765	1.58e-15
ENSG00000120885	CLU	1.23966	2.5e-34
ENSG00000259366	CTD-2647L4.4	-1.31693	0.0112551
ENSG00000272327	RP11-1002K11.1	-1.28678	8.12e-22
ENSG00000020181	GPR124	-1.67752	4.01e-17
ENSG00000129691	ASH2L	-1.12757	3.12e-19
ENSG00000239218	RPS20P22	-1.75753	0.00495523
ENSG00000176907	C8orf4	-1.24697	0.00311381
ENSG00000165061	ZMAT4	-1.35447	5.63e-08
ENSG00000104332	SFRP1	-1.08422	2.48e-19
ENSG00000029534	ANK1	-1.57455	1.63e-07
ENSG00000176209	SMIM19	-1.49615	2.38e-26
ENSG00000272457	RP11-1070A24.2	2.35767	0.00539777
ENSG00000170786	SDR16C5	-2.33046	0.000207
ENSG00000177182	CLVS1	-5.26395	2.56e-20
ENSG00000222898	RN7SKP97	1.87617	1.6e-09
ENSG00000185697	MYBL1	-1.48985	1.31e-18
ENSG00000271966	RP11-7F18.2	-1.56714	0.0372794
ENSG00000067167	TRAM1	-1.10007	2.1e-07
ENSG00000104321	TRPA1	-3.387	1.59e-48
ENSG00000137558	PI15	6.7046	0.00246147
ENSG00000076641	PAG1	2.4421	0.0035258
ENSG00000185015	CA13	1.8589	0.04273
ENSG00000147606	SLC26A7	4.2203	7.73e-05
ENSG00000253585	KB-1184D12.1	2.32799	0.00575389
ENSG00000253878	RP11-347C18.3	1.41085	1.18e-05
ENSG00000132561	MATN2	-2.04902	2.03e-65
ENSG00000207067	SNORA72	2.08426	1.01e-08
ENSG00000156509	FBXO43	-1.17887	8.47e-12
ENSG00000253666	KB-1615E4.2	-2.83911	0.000935
ENSG00000264991	AP001205.1	1.58755	0.0429374
ENSG00000261670	RP11-1C8.5	2.81032	0.00449294
ENSG00000251003	RP11-152P17.2	1.02298	1.24e-08
ENSG00000104447	TRPS1	-2.0446	0.00973293
ENSG00000147676	MAL2	2.00464	0.0309992
ENSG00000170961	HAS2	-3.76099	2.03e-29
ENSG00000248690	HAS2-AS1	-2.18538	0.000409
ENSG00000156804	FBXO32	-1.2338	3.76e-12
ENSG00000271975	RP11-383J24.6	-1.29944	7.03e-09
ENSG00000170873	MTSS1	-1.35982	9.57e-08
ENSG00000249816	LINC00964	-2.44194	0.00852019
ENSG00000168672	FAM84B	-1.12145	3.87e-10
ENSG00000246228	CASC8	-1.12879	0.00048
ENSG00000147697	GSDMC	1.6613	0.0228229
ENSG00000131773	KHDRBS3	-1.51808	4.35e-06
ENSG00000169436	COL22A1	-3.17065	1.32e-07
ENSG00000169427	KCNK9	1.90068	0.017992
ENSG00000261693	RP13-467H17.1	1.8321	0.000325
ENSG00000198576	ARC	1.73118	0.0114627
ENSG00000247317	RP11-273G15.2	1.57752	3.2e-07
ENSG00000250571	GLI4	1.33618	3.66e-16
ENSG00000179698	KIAA1875	1.21812	3.01e-10
ENSG00000179832	MROH1	-1.03438	5.29e-06
ENSG00000160973	FOXH1	1.58034	0.000102
ENSG00000167701	GPT	1.37057	0.0423381
ENSG00000167700	MFSD3	1.0068	4.34e-12
ENSG00000265393	CTD-2517M22.17	1.61032	3.89e-05
ENSG00000170122	FOXD4	1.72188	0.00101817
ENSG00000107099	DOCK8	1.38012	0.0422934
ENSG00000226403	RP11-31F19.1	1.20944	0.0010364
ENSG00000236404	RP11-125B21.2	1.12616	0.00582902
ENSG00000120211	INSL4	1.50583	3.74e-09
ENSG00000107014	RLN2	3.02399	0.0460376
ENSG00000107018	RLN1	2.35431	0.0224475
ENSG00000153707	PTPRD	-4.52895	3.31e-12
ENSG00000234297	RP11-54D18.4	-1.00257	0.0498399
ENSG00000164985	PSIP1	-1.09595	1.09e-16
ENSG00000241043	GVQW1	-1.8644	0.0472358
ENSG00000107262	BAG1	-1.21907	1.28e-27
ENSG00000165269	AQP7	1.57825	4.33e-07
ENSG00000205274	TRBV20OR9-2	2.2686	0.00121249
ENSG00000164978	NUDT2	1.03529	6.61e-15
ENSG00000164972	C9orf24	1.36255	0.0387491
ENSG00000168913	ENHO	1.62848	4.53e-05
ENSG00000215187	FAM166B	1.43949	0.00225561
ENSG00000137101	CD72	2.32924	0.00131231
ENSG00000159899	NPR2	-1.11412	1.93e-08
ENSG00000196196	HRCT1	1.26123	0.0222572
ENSG00000122694	GLIPR2	-1.04304	0.000759
ENSG00000070601	FRMPD1	2.1994	0.00203357
ENSG00000122741	DCAF10	-1.11947	4.67e-18
ENSG00000237357	RP11-475I24.3	1.05052	4.94e-08
ENSG00000226007	RP11-211N8.2	1.19563	0.00775134
ENSG00000154330	PGM5	-3.10262	1.75e-09
ENSG00000119125	GDA	1.4827	0.00203591
ENSG00000225434	RP11-63P12.6	1.54385	3.49e-11
ENSG00000236849	RP11-151D14.1	-1.51788	2.67e-06
ENSG00000119121	TRPM6	1.03118	0.0388801
ENSG00000156017	C9orf41	-1.00712	2.66e-13
ENSG00000106772	PRUNE2	2.81524	0.00340157
ENSG00000165105	RASEF	-2.52982	3.11e-17
ENSG00000148057	IDNK	-1.0336	2.07e-05
ENSG00000165119	HNRNPK	-1.90634	1.21e-36
ENSG00000187753	C9orf153	2.75187	0.000526
ENSG00000269994	RP11-276H19.2	1.03378	0.00256397
ENSG00000234460	XXyac-YM21GA2.4	-1.72454	1.19e-08
ENSG00000130045	NXNL2	-1.12832	0.0310081
ENSG00000186354	C9orf47	-2.26913	0.00700426
ENSG00000213694	S1PR3	-1.06335	4.4e-09
ENSG00000187984	ANKRD19P	4.42568	0.000121
ENSG00000127084	FGD3	2.44103	2.62e-12
ENSG00000131668	BARX1	-1.97211	2.3e-06
ENSG00000199133	MIRLET7D	1.32871	0.0148618
ENSG00000237857	RP11-435O5.2	-1.07212	0.000447
ENSG00000130948	HSD17B3	3.39518	6.97e-18
ENSG00000136842	TMOD1	-1.16596	0.000399
ENSG00000204291	COL15A1	-2.73571	0.00326059
ENSG00000119508	NR4A3	1.58115	2.98e-15
ENSG00000170681	MURC	1.31087	0.0100948
ENSG00000148123	LPPR1	-1.8957	0.00156129
ENSG00000136881	BAAT	-2.81949	6.04e-40
ENSG00000204173	LRRC37A5P	1.78677	0.00911192
ENSG00000230185	C9orf147	1.35851	0.00434586
ENSG00000165185	KIAA1958	-1.05011	5.39e-12
ENSG00000229314	ORM1	2.95259	0.0311877
ENSG00000181634	TNFSF15	-2.05595	2.73e-14
ENSG00000230894	RP11-67K19.3	-1.63493	0.000545
ENSG00000106852	LHX6	1.89388	0.0168682
ENSG00000201302	SNORA65	1.4315	0.0152647
ENSG00000225032	RP11-228B15.4	2.02417	1.53e-08
ENSG00000148346	LCN2	2.69989	7.59e-05
ENSG00000234705	HMGA1P4	1.50942	0.00138544
ENSG00000233901	RP11-65J3.1	-1.11946	0.00026
ENSG00000227619	RP11-492E3.2	-2.8905	2.19e-32
ENSG00000167157	PRRX2	-1.15059	0.00181664
ENSG00000165695	AK8	-2.01241	2.3e-06
ENSG00000170835	CEL	1.3222	0.000247
ENSG00000148288	GBGT1	1.01397	0.00315395
ENSG00000123453	SARDH	1.68614	0.0198217
ENSG00000160293	VAV2	-1.4787	3.66e-29
ENSG00000235106	LINC00094	-1.15453	3.31e-10
ENSG00000130635	COL5A1	-3.48252	1.11e-188
ENSG00000196366	C9orf163	-2.21573	0.000248
ENSG00000228544	CCDC183-AS1	2.68435	1.81e-18
ENSG00000176919	C8G	1.09192	0.0464816
ENSG00000212864	RNF208	1.14559	0.000158
ENSG00000188833	ENTPD8	1.74143	1.27e-10
ENSG00000203993	C9orf37	1.12384	1.16e-16
ENSG00000148408	CACNA1B	1.55448	0.00334735
ENSG00000159247	TUBBP5	2.36723	0.000328
ENSG00000198840	MT-ND3	1.16106	1.94e-29
ENSG00000047644	WWC3	-1.94233	1.38e-65
ENSG00000169933	FRMPD4	-2.71976	0.0125008
ENSG00000182287	AP1S2	-1.62159	7.21e-27
ENSG00000169891	REPS2	-1.48581	4.96e-11
ENSG00000188158	NHS	-1.39736	1.26e-19
ENSG00000149970	CNKSR2	-1.55403	7.3e-35
ENSG00000233785	RP13-314C10.5	2.88188	7.78e-14
ENSG00000176746	MAGEB6	4.31869	7.99e-05
ENSG00000147041	SYTL5	-1.88437	6.31e-09
ENSG00000069535	MAOB	-1.88797	0.00172377
ENSG00000102057	KCND1	1.11217	1.38e-12
ENSG00000017621	MAGIX	1.2606	1.35e-05
ENSG00000171365	CLCN5	1.04021	1.89e-08
ENSG00000184205	TSPYL2	1.11152	0.00571698
ENSG00000196632	WNK3	2.95019	1.46e-05
ENSG00000187601	MAGEH1	1.20734	0.0015533
ENSG00000247746	USP51	-1.18741	0.0135342
ENSG00000079482	OPHN1	-1.03067	1.01e-10
ENSG00000130054	FAM155B	-1.03678	4.65e-08
ENSG00000196338	NLGN3	1.4128	3.67e-17
[truncated: 42 more rows]
