# Supplementary material for: Viral-induced alternative splicing of host genes promotes influenza replication
Source: eLife. 2020 Dec 3;9:e55500. doi: 10.7554/eLife.55500 (PMC7735754; doi:10.7554/eLife.55500)
Supplement: Supplementary file 2. — Change in splicing (delta percent spliced isoform or dPSI) for specific spliced junctions are given at 6 and 12 hr post infection with IAV (page 1 and 2, WSN_6HPI and WNS_12HPI), or after depletion of hnRNP K by shRNA (page 3, shHNRNPK). [file elife-55500-supp2.xlsx]

## Sheet: WSN_6HPI
GeneName	GeneID	Splice Junction Coords	dPSI
ACOX1	ENSG00000161533	chr17:73974774-73975046	-0.172188
NADK	ENSG00000008130	chr1:1696885-1709728	-0.285352
LUC7L3	ENSG00000108848	chr17:48828055-48828056	-0.231458
SYNJ2	ENSG00000078269	chr6:158450058-158451440	0.19513
VARS2	ENSG00000137411	chr6:30885583-30886604	-0.120858
PHF14	ENSG00000106443	chr7:11014572-11021999	0.181669
VEZF1	ENSG00000136451	chr17:56060754-56065440	-0.13389
SUN1	ENSG00000164828	chr7:889240-889560	-0.346136
LRRC45	ENSG00000169683	chr17:79987061-79987419	-0.161701
MEF2D	ENSG00000116604	chr1:156449588-156450626	-0.131521
AKR1B15	ENSG00000227471	chr7:134234001-134249350	-0.601793
SYNJ2	ENSG00000078269	chr6:158438322-158449788	0.193127
C9orf152	ENSG00000188959	chr9:112963754-112969667	-0.259646
GABRE	ENSG00000102287	chrX:151124332-151125755	0.351833
RAP1B	ENSG00000127314	chr12:69004823-69042479	-0.194235
RP11-66N24.3	ENSG00000258727	chr14:24036631-24036898	-0.431599
NPIPP1	ENSG00000188599	chr16:15198615-15199972	-0.380053
LARP1B	ENSG00000138709	chr4:129028468-129029038	0.400363
SYVN1	ENSG00000162298	chr11:64896186-64897723	0.222735
NCOA7	ENSG00000111912	chr6:126211956-126236479	-0.134973
PDGFA	ENSG00000197461	chr7:540136-540753	0.154107
DNAJC9	ENSG00000213551	chr10:75007262-75007263	-0.281797
JMJD1C	ENSG00000171988	chr10:64979743-65024411	0.106596
CDK16	ENSG00000102225	chrX:47078504-47082951	-0.12069
ALKBH1	ENSG00000100601	chr14:78146313-78161081	-0.324861
UBR5	ENSG00000104517	chr8:103312379-103316271	-0.218903
YAE1D1	ENSG00000241127	chr7:39610226-39611876	-0.319081
SCD	ENSG00000099194	chr10:102114389-102116289	-0.113676
GSK3A	ENSG00000105723	chr19:42734543-42734544	-0.107919
PRKAG1	ENSG00000181929	chr12:49399635-49406845	-0.124803
NRG1	ENSG00000157168	chr8:32474403-32585467	-0.239452
TNRC6A	ENSG00000090905	chr16:24803138-24804794	0.219905
ENSG00000269751	ENSG00000269751	chr19:48984006-48984007	-0.228144
CTD-2600O9.1	ENSG00000187185	chr16:57832544-57841515	0.220276
ALPK2	ENSG00000198796	chr18:56149271-56165281	-0.204036
ACAD8	ENSG00000151498	chr11:134129639-134130938	-0.114602
KIF12	ENSG00000136883	chr9:116854922-116855509	0.194474
EPB41L1	ENSG00000088367	chr20:34785963-34797410	0.137997
EPC1	ENSG00000120616	chr10:32562209-32573626	-0.276163
ZBTB38	ENSG00000177311	chr3:141105779-141122769	-0.254543
SNRNP27	ENSG00000124380	chr2:70131557-70131644	0.158515
RECQL5	ENSG00000108469	chr17:73654540-73657035	-0.207104
LURAP1L	ENSG00000153714	chr9:12776026-12821385	-0.263644
RP11-44N21.1	ENSG00000257556	chr14:105561779-105561877	0.266441
PPP3CB	ENSG00000107758	chr10:75199659-75204483	0.193068
E2F6	ENSG00000169016	chr2:11595600-11597305	0.255722
B4GALT3	ENSG00000158850	chr1:161145885-161146224	0.216407
CCDC106	ENSG00000173581	chr19:56159643-56160368	-0.222796
HEATR5B	ENSG00000008869	chr2:37234447-37235754	-0.139861
SNAP25	ENSG00000132639	chr20:10258374-10265372	0.106006
ZNF254	ENSG00000213096	chr19:24289445-24290018	0.526701
RCAN1	ENSG00000159200	chr21:35896008-35898961	0.18052
TPM2	ENSG00000198467	chr9:35685136-35685266	-0.21711
MROH6	ENSG00000204839	chr8:144648687-144649956	0.197961
LINC-PINT	ENSG00000231721	chr7:130629206-130630479	0.211864
SNHG8	ENSG00000269893	chr4:119200032-119200033	-0.16049
PCNT	ENSG00000160299	chr21:47851892-47855817	0.235942
EID2B	ENSG00000176401	chr19:40023379-40023380	-0.192118
RP11-231C14.4	ENSG00000169203	chr16:29498720-29502788	-0.259236
MAP4K5	ENSG00000012983	chr14:50915550-50923234	-0.176858
ADAR	ENSG00000160710	chr1:154575102-154600331	-0.229439
SPIN2B	ENSG00000186787	chrX:57146534-57146838	0.130293
PCM1	ENSG00000078674	chr8:17838264-17842956	-0.199541
AGAP3	ENSG00000133612	chr7:150831655-150837066	0.133189
FNBP4	ENSG00000109920	chr11:47746330-47747289	0.273996
CWF19L1	ENSG00000095485	chr10:102006692-102010005	-0.128818
DENR	ENSG00000139726	chr12:123238354-123246734	-0.415993
TRIM13	ENSG00000204977	chr13:50571267-50571803	-0.237058
UGCG	ENSG00000148154	chr9:114688776-114689753	0.293091
MISP	ENSG00000099812	chr19:751171-756890	-0.192889
SMEK1	ENSG00000100796	chr14:91939714-91942194	-0.186359
RNF145	ENSG00000145860	chr5:158585434-158585435	-0.179796
NF1	ENSG00000196712	chr17:29576137-29579956	-0.252782
HERC4	ENSG00000148634	chr10:69797926-69804161	-0.113973
DAZAP1	ENSG00000071626	chr19:1416702-1417499	0.12898
RIPK4	ENSG00000183421	chr21:43166022-43166773	-0.214452
BCL2L12	ENSG00000126453	chr19:50173745-50176955	-0.170283
AKR1B15	ENSG00000227471	chr7:134250298-134252665	0.412029
MAFK	ENSG00000198517	chr7:1581934-1581935	-0.241059
SMC4	ENSG00000113810	chr3:160117537-160118610	-0.236834
MYO18A	ENSG00000196535	chr17:27412666-27413456	0.101464
PHF12	ENSG00000109118	chr17:27237387-27238130	-0.163178
GRB7	ENSG00000141738	chr17:37902041-37902166	-0.229087
BCL2L11	ENSG00000153094	chr2:111907724-111921710	-0.109422
TCFL5	ENSG00000101190	chr20:61473449-61485368	-0.244096
ACYP1	ENSG00000119640	chr14:75520362-75530173	-0.262456
HMGB1	ENSG00000189403	chr13:31035670-31035671	-0.230642
GLYR1	ENSG00000140632	chr16:4854522-4854523	-0.14214
DTX2P1	ENSG00000186704	chr7:76633624-76634867	-0.514409
ARHGAP12	ENSG00000165322	chr10:32141525-32150323	-0.212589
GAK	ENSG00000178950	chr4:860322-860744	-0.217589
SPRED2	ENSG00000198369	chr2:65571728-65571853	0.296885
LINC00473	ENSG00000223414	chr6:166354254-166401017	-0.407413
UVRAG	ENSG00000198382	chr11:75827059-75851755	-0.125605
ATPAF1	ENSG00000123472	chr1:47100750-47100751	-0.236137
RPL7L1	ENSG00000146223	chr6:42854897-42854898	-0.223827
NADK	ENSG00000008130	chr1:1684499-1685006	-0.14164
AKR1B15	ENSG00000227471	chr7:134252729-134252910	0.345989
TAB3	ENSG00000157625	chrX:30873679-30877604	-0.163571
FBL	ENSG00000105202	chr19:40331155-40336931	0.342606
RP11-155G14.6	ENSG00000240758	chr7:128103542-128106617	0.26523
DMPK	ENSG00000104936	chr19:46283639-46285451	0.245287
APOBEC3F	ENSG00000128394	chr22:39439095-39440088	-0.186903
BCS1L	ENSG00000074582	chr2:219524466-219525662	-0.235711
PARP6	ENSG00000137817	chr15:72559369-72559370	-0.211768
NPIPA1	ENSG00000183426	chr16:15044112-15045472	-0.35888
C8orf44	ENSG00000213865	chr8:67579936-67589877	-0.113165
HNRNPDL	ENSG00000152795	chr4:83346715-83346716	-0.212602
ZNF580	ENSG00000213015	chr19:56152549-56153863	-0.117442
MTCL1	ENSG00000168502	chr18:8813231-8818961	-0.156059
NCAPD2	ENSG00000010292	chr12:6602669-6603282	0.275327
ORMDL1	ENSG00000128699	chr2:190647849-190648995	0.23367
TMEM256-PLSCR3	ENSG00000187838	chr17:7297155-7297423	-0.175276
MROH6	ENSG00000204839	chr8:144649846-144649956	-0.304522
CYLD	ENSG00000083799	chr16:50776752-50783487	-0.26818
ROGDI	ENSG00000067836	chr16:4850579-4851268	0.10212
PTPRJ	ENSG00000149177	chr11:48152268-48153063	0.397376
PAXBP1	ENSG00000159086	chr21:34127664-34127665	-0.393241
ECHDC2	ENSG00000121310	chr1:53377693-53379567	0.235623
RP11-163E9.2	ENSG00000239969	chr7:102004858-102006421	-0.127629
LINC01184	ENSG00000245937	chr5:127396936-127418662	0.194878
TARBP2	ENSG00000139546	chr12:53895245-53895799	-0.176129
TMEM11	ENSG00000178307	chr17:21102153-21117404	-0.134493
ZNF821	ENSG00000102984	chr16:71913926-71917114	-0.347168
TP53I11	ENSG00000175274	chr11:44958240-44958354	0.227717
CCDC14	ENSG00000175455	chr3:123634565-123649949	-0.12078
COL4A3BP	ENSG00000113163	chr5:74695212-74696030	0.134994
C17orf61-PLSCR3	ENSG00000262481	chr17:7296683-7296786	-0.236005
ZNF530	ENSG00000183647	chr19:58115774-58117054	-0.592199
CUEDC1	ENSG00000180891	chr17:55943905-55944718	0.141989
B9D2	ENSG00000123810	chr19:41867108-41869337	0.328002
FAM133B	ENSG00000234545	chr7:92210917-92219582	-0.161736
SPDL1	ENSG00000040275	chr5:169015579-169018052	-0.1893
BRIP1	ENSG00000136492	chr17:59853923-59857622	-0.27452
OAS1	ENSG00000089127	chr12:113355505-113356402	-0.289291
TRAPPC10	ENSG00000160218	chr21:45503183-45504003	-0.12599
YY1AP1	ENSG00000163374	chr1:155640255-155642351	-0.113925
TPCN1	ENSG00000186815	chr12:113726039-113726563	0.118125
TRAFD1	ENSG00000135148	chr12:112563953-112568315	0.197655
CHD2	ENSG00000173575	chr15:93518180-93521464	-0.136168
RBM39	ENSG00000131051	chr20:34317449-34319863	-0.110108
RILPL1	ENSG00000188026	chr12:124008192-124017721	-0.271362
MIR22HG	ENSG00000186594	chr17:1615693-1615694	-0.386685
RTN2	ENSG00000125744	chr19:45992811-45996418	0.15791
HSF4	ENSG00000102878	chr16:67201125-67201206	-0.24502
MRE11A	ENSG00000020922	chr11:94204925-94209455	-0.277417
BTN2A2	ENSG00000124508	chr6:26383527-26384020	0.2738
RSRP1	ENSG00000117616	chr1:25569028-25569029	-0.247326
MIB2	ENSG00000197530	chr1:1552454-1552455	-0.399114
HIPK3	ENSG00000110422	chr11:33369559-33369712	0.227104
ST7L	ENSG00000007341	chr1:113150219-113153463	0.126689
BRD1	ENSG00000100425	chr22:50181142-50181225	0.229203
BBIP1	ENSG00000214413	chr10:112661370-112677879	0.106519
CLK1	ENSG00000013441	chr2:201724938-201725961	0.432576
ATF7	ENSG00000170653	chr12:53910432-53910433	-0.471644
RBM5	ENSG00000003756	chr3:50137484-50137965	0.145952
ASXL1	ENSG00000171456	chr20:31017234-31017704	-0.203808
MAP4K4	ENSG00000071054	chr2:102476326-102481392	0.109139
COASY	ENSG00000068120	chr17:40714287-40714288	-0.145775
RNH1	ENSG00000023191	chr11:502249-504824	-0.151067
OGFOD3	ENSG00000181396	chr17:80352419-80356072	-0.2385
DDX5	ENSG00000108654	chr17:62496891-62496892	-0.134072
RASSF1	ENSG00000068028	chr3:50369585-50374604	-0.223723
HNRNPA2B1	ENSG00000122566	chr7:26230356-26230357	-0.196982
PCNP	ENSG00000081154	chr3:101293123-101298686	0.159621
C1orf86	ENSG00000162585	chr1:2121220-2124284	0.239313
FNDC3B	ENSG00000075420	chr3:171851336-171944661	-0.286528
NPIPP1	ENSG00000188599	chr16:15198615-15199972	-0.338275
AP006621.5	ENSG00000255284	chr11:783889-783890	-0.21243
ENSG00000138041	ENSG00000138041	chr2:55816092-55825552	-0.10728
TECR	ENSG00000099797	chr19:14675670-14675878	0.119638
AKR1C2	ENSG00000151632	chr10:5042102-5042103	-0.217842
C11orf24	ENSG00000171067	chr11:68029270-68029271	-0.302472
CPEB2	ENSG00000137449	chr4:15034835-15054038	-0.158313
POLR2B	ENSG00000047315	chr4:57876366-57876367	-0.565756
RBM5	ENSG00000003756	chr3:50137484-50137965	0.11073
HNRNPA2B1	ENSG00000122566	chr7:26230080-26232115	0.227664
GLIS2	ENSG00000126603	chr16:4382453-4383348	-0.220972
CCS	ENSG00000173992	chr11:66366724-66366930	0.194691
HERC2	ENSG00000128731	chr15:28424176-28424288	-0.167932
TPM2	ENSG00000198467	chr9:35684804-35685266	0.161584
ASB1	ENSG00000065802	chr2:239342336-239344352	-0.201079
STAG2	ENSG00000101972	chrX:123224614-123224704	0.112916
NAB2	ENSG00000166886	chr12:57486978-57487190	-0.406105
LDLR	ENSG00000130164	chr19:11234020-11238684	-0.215867
CCBL2	ENSG00000137944	chr1:89454034-89458268	-0.274087
MYO18A	ENSG00000196535	chr17:27409456-27412622	0.110059
CRNDE	ENSG00000245694	chr16:54957562-54959013	-0.147019
DNAJB6	ENSG00000105993	chr7:157178305-157202489	-0.190518
HGS	ENSG00000185359	chr17:79651133-79652635	-0.116182
ENSG00000140181	ENSG00000140181	chr15:23318711-23326007	0.245257
AOC3	ENSG00000131471	chr17:41006750-41007461	-0.188526
MAP3K10	ENSG00000130758	chr19:40720128-40720877	-0.245554
CXCL2	ENSG00000081041	chr4:74964401-74964516	0.171426
AGAP3	ENSG00000133612	chr7:150837963-150838985	0.167707
SURF2	ENSG00000148291	chr9:136224690-136226826	-0.146475
SFPQ	ENSG00000116560	chr1:35643637-35644266	0.151868
NR2F1-AS1	ENSG00000237187	chr5:92747215-92889467	-0.175866
STRN3	ENSG00000196792	chr14:31382863-31388172	0.224607
NADK	ENSG00000008130	chr1:1685647-1685723	-0.16531
MTFR2	ENSG00000146410	chr6:136570291-136571114	-0.422573
GIT1	ENSG00000108262	chr17:27910634-27916345	-0.176582
SUN1	ENSG00000164828	chr7:889670-891021	-0.331994
TMUB2	ENSG00000168591	chr17:42264934-42264935	-0.287659
GRAMD1A	ENSG00000089351	chr19:35491390-35500023	-0.236181
ARGLU1	ENSG00000134884	chr13:107209852-107209853	-0.210801
CTDSPL2	ENSG00000137770	chr15:44792011-44806796	-0.156195
KCTD9	ENSG00000104756	chr8:25303766-25315715	-0.223046
AGAP3	ENSG00000133612	chr7:150831655-150837066	0.101873
WHSC1L1	ENSG00000147548	chr8:38157108-38162105	-0.100263
PYGO2	ENSG00000163348	chr1:154935070-154935995	-0.141882
ZNF302	ENSG00000089335	chr19:35169008-35169642	0.368438
C12orf76	ENSG00000174456	chr12:110466394-110486168	0.324131
FLRT3	ENSG00000125848	chr20:14309973-14318050	0.313154
ITGB3BP	ENSG00000142856	chr1:63912527-63919589	-0.185113
CCNT2	ENSG00000082258	chr2:135700244-135703671	-0.257821
RBM28	ENSG00000106344	chr7:127975733-127975901	0.175122
RBM41	ENSG00000089682	chrX:106359284-106359880	-0.210457
MBD1	ENSG00000141644	chr18:47796188-47797839	-0.193456
ENSG00000185020	ENSG00000185020	chr9:40324600-40325171	0.296455
PEX1	ENSG00000127980	chr7:92134216-92135562	-0.104099
MAFK	ENSG00000198517	chr7:1578093-1578785	0.231999
MADD	ENSG00000110514	chr11:47306745-47307002	-0.21987
VEGFA	ENSG00000112715	chr6:43746655-43752278	-0.182907
LETMD1	ENSG00000050426	chr12:51450028-51450133	0.22212
CASK	ENSG00000147044	chrX:41416353-41419032	0.10069
ZNF777	ENSG00000196453	chr7:149153128-149163634	0.542648
NPIPP1	ENSG00000188599	chr16:15212911-15219548	-0.151613
WDR20	ENSG00000140153	chr14:102687995-102689167	0.449699
HNRNPA1	ENSG00000135486	chr12:54675578-54675579	-0.415725
PCGF5	ENSG00000180628	chr10:92982740-92987094	0.24702
MTCL1	ENSG00000168502	chr18:8786089-8796230	-0.275246
PVT1	ENSG00000249859	chr8:129001537-129021836	-0.465133
C1orf52	ENSG00000162642	chr1:85724405-85725041	0.206087
FTCDNL1	ENSG00000226124	chr2:200684480-200710798	-0.213284
TMEM107	ENSG00000179029	chr17:8077590-8079518	-0.258478
PLCXD2	ENSG00000240891	chr3:111451550-111564668	-0.330853
SUMO1	ENSG00000116030	chr2:203079157-203103163	-0.212272
ZNF765	ENSG00000196417	chr19:53905444-53957904	0.144765
LDLR	ENSG00000130164	chr19:11231198-11233850	-0.116504
PWWP2B	ENSG00000171813	chr10:134219793-134230565	-0.141823
RP11-112J3.16	ENSG00000227388	chr9:35786320-35786644	0.207723
SNHG1	ENSG00000255717	chr11:62622410-62622605	-0.220172
BBIP1	ENSG00000214413	chr10:112677971-112678879	0.189191
GABPB1	ENSG00000104064	chr15:50593099-50593454	-0.216109
BPTF	ENSG00000171634	chr17:65972074-65977552	0.176822
CD44	ENSG00000026508	chr11:35211612-35232793	-0.351078
ATF2	ENSG00000115966	chr2:175945493-175957789	-0.150013
IP6K2	ENSG00000068745	chr3:48731673-48732127	-0.165024
ZSCAN32	ENSG00000140987	chr16:3433711-3434459	0.30114
ANKRD28	ENSG00000206560	chr3:15709812-15711617	0.152641
SNX14	ENSG00000135317	chr6:86246642-86251703	-0.125101
IFNAR2	ENSG00000159110	chr21:34633032-34634866	0.373382
TMEM248	ENSG00000106609	chr7:66386448-66406835	-0.203848
KMT2D	ENSG00000167548	chr12:49416658-49418361	-0.190451
C8orf58	ENSG00000241852	chr8:22459825-22460708	0.15532
ZC3H11A	ENSG00000058673	chr1:203771389-203771390	-0.378841
IL4R	ENSG00000077238	chr16:27351594-27353442	-0.10576
HAPLN3	ENSG00000140511	chr15:89422500-89424588	0.405635
PTPN3	ENSG00000070159	chr9:112216854-112219572	0.125559
TMEM198B	ENSG00000182796	chr12:56227230-56227231	-0.170892
BAAT	ENSG00000136881	chr9:104133745-104145752	-0.336233
TRIM13	ENSG00000204977	chr13:50571352-50571803	0.266673
KMT2E	ENSG00000005483	chr7:104654982-104681286	-0.361163
SRSF10	ENSG00000188529	chr1:24297929-24298063	-0.183185
RHOBTB1	ENSG00000072422	chr10:62631201-62631202	-0.138957
SPACA6P	ENSG00000182310	chr19:52205905-52206070	0.29284
UBTF	ENSG00000108312	chr17:42287841-42288407	0.100306
SESN2	ENSG00000130766	chr1:28599304-28599869	-0.284413
AHNAK	ENSG00000124942	chr11:62301546-62302475	-0.103682
ANKRD10	ENSG00000088448	chr13:111545610-111558380	-0.395461
SRSF5	ENSG00000100650	chr14:70235968-70237184	-0.157951
RIC8B	ENSG00000111785	chr12:107254190-107279682	-0.150162
PREP	ENSG00000085377	chr6:105736769-105771540	-0.107063
EEF1D	ENSG00000104529	chr8:144672251-144674817	0.277388
DICER1	ENSG00000100697	chr14:95555345-95556850	0.35464
SNRNP27	ENSG00000124380	chr2:70131557-70131558	-0.193759
AP1G1	ENSG00000166747	chr16:71823385-71842666	-0.132241
BCL2L2-PABPN1	ENSG00000258643	chr14:23777408-23780182	-0.101782
ENC1	ENSG00000171617	chr5:73932323-73936132	-0.255485
ZC3H11A	ENSG00000058673	chr1:203771779-203771780	-0.303842
RP11-159D12.2	ENSG00000264112	chr17:56067009-56067010	-0.339263
ZNF821	ENSG00000102984	chr16:71895845-71898041	-0.123743
MUC13	ENSG00000173702	chr3:124646837-124653505	0.112456
LRP8	ENSG00000157193	chr1:53712224-53712225	-0.2554
VHL	ENSG00000134086	chr3:10183871-10188198	-0.136475
PRPF3	ENSG00000117360	chr1:150302967-150305155	0.12433
GABPB1	ENSG00000104064	chr15:50593099-50593454	-0.21637
FAM107B	ENSG00000065809	chr10:14572514-14646239	-0.104622
AKR1B10	ENSG00000198074	chr7:134220415-134221461	0.223225
SLC25A26	ENSG00000144741	chr3:66271553-66286968	-0.231222
RBM39	ENSG00000131051	chr20:34326939-34328447	-0.264037
CENPV	ENSG00000166582	chr17:16252337-16252338	-0.114427
ECHDC2	ENSG00000121310	chr1:53377693-53379567	0.266817
UNKL	ENSG00000059145	chr16:1414999-1415000	-0.268912
DPH5	ENSG00000117543	chr1:101479374-101487197	-0.176057
ITGB4	ENSG00000132470	chr17:73751931-73752510	-0.148556
BSCL2	ENSG00000168000	chr11:62474796-62476619	-0.250176
BAZ1B	ENSG00000009954	chr7:72856023-72856024	-0.120554
VEZF1	ENSG00000136451	chr17:56060754-56065440	-0.41761
MTSS1L	ENSG00000132613	chr16:70699443-70708209	-0.2187
NAPRT	ENSG00000147813	chr8:144660113-144661949	0.294804
COX11	ENSG00000166260	chr17:53029473-53031022	0.199547
SRSF5	ENSG00000100650	chr14:70235968-70236228	0.172341
MGAT5B	ENSG00000167889	chr17:74922812-74928727	0.270425
ACYP1	ENSG00000119640	chr14:75520362-75530173	-0.209956
SETX	ENSG00000107290	chr9:135187243-135201711	-0.200137
ASAP1	ENSG00000153317	chr8:131414216-131455706	-0.102341
ANKRD49	ENSG00000168876	chr11:94231130-94231237	-0.351535
ZFP62	ENSG00000196670	chr5:180275082-180278381	-0.276567
NAB1	ENSG00000138386	chr2:191520879-191523884	0.171978
PCNP	ENSG00000081154	chr3:101293123-101298686	0.158837
AC138969.4	ENSG00000183889	chr16:16442589-16443949	-0.278899
WTAP	ENSG00000146457	chr6:160169401-160174492	-0.225518
PAN2	ENSG00000135473	chr12:56722425-56726597	-0.1166
KDM3A	ENSG00000115548	chr2:86669356-86676930	-0.322574
DUSP16	ENSG00000111266	chr12:12674397-12715051	-0.283842
ENSG00000184886	ENSG00000184886	chr17:34890881-34892943	0.391783
HEATR3	ENSG00000155393	chr16:50100893-50102691	0.260128
NFKBIB	ENSG00000104825	chr19:39399370-39399371	-0.134188
C1QTNF6	ENSG00000133466	chr22:37578129-37578130	-0.137487
LDLR	ENSG00000130164	chr19:11238761-11240189	-0.224767
MTSS1L	ENSG00000132613	chr16:70699443-70708209	-0.200217
SPTBN1	ENSG00000115306	chr2:54753703-54826229	-0.19897
PCMTD1	ENSG00000168300	chr8:52746249-52758221	-0.163496
NBPF3	ENSG00000142794	chr1:21771712-21792228	0.345288
E2F6	ENSG00000169016	chr2:11593924-11595468	0.230746
PF4	ENSG00000163737	chr4:74847260-74853009	0.740754
GOLPH3L	ENSG00000143457	chr1:150667326-150668206	0.136218
PCBP1-AS1	ENSG00000179818	chr2:70278437-70310670	-0.231688
WDR19	ENSG00000157796	chr4:39274681-39274794	0.199136
DMXL2	ENSG00000104093	chr15:51751857-51752487	0.300978
WARS	ENSG00000140105	chr14:100835595-100842597	-0.396516
RP11-159D12.2	ENSG00000264112	chr17:56066908-56066909	-0.33969
CDK5R1	ENSG00000176749	chr17:30815104-30815265	0.542346
PPP1R7	ENSG00000115685	chr2:242105856-242109196	-0.179621
TBX3	ENSG00000135111	chr12:115117456-115118684	-0.322277
BMPR1B	ENSG00000138696	chr4:95917285-96025559	-0.28609
TPM1	ENSG00000140416	chr15:63353472-63353912	-0.554936
FLRT3	ENSG00000125848	chr20:14308204-14318050	-0.260688
UPF2	ENSG00000151461	chr10:11963306-11971864	-0.134333
THUMPD3-AS1	ENSG00000206573	chr3:9431598-9431599	-0.457839
NCL	ENSG00000115053	chr2:232321835-232321997	0.399238
PTBP2	ENSG00000117569	chr1:97270495-97272422	-0.321969
SREK1	ENSG00000153914	chr5:65454760-65455047	0.267539
QRICH1	ENSG00000198218	chr3:49114471-49131345	-0.106838
RPL32	ENSG00000144713	chr3:12881741-12882269	0.364935
DTX2P1-UPK3BP1-PMS2P11	ENSG00000265479	chr7:76633624-76634867	-0.515187
REPIN1	ENSG00000214022	chr7:150066957-150067849	0.321475
FAM111A	ENSG00000166801	chr11:58910777-58910970	0.34255
TRA2A	ENSG00000164548	chr7:23562051-23571408	-0.478353
FNBP4	ENSG00000109920	chr11:47753113-47754089	-0.261206
RP11-45M22.4	ENSG00000264187	chr17:17118630-17120383	0.164365
EFR3A	ENSG00000132294	chr8:132916569-132952746	-0.172746
ENSG00000237792	ENSG00000237792	chr9:65602810-65631903	0.230552
HMGN2	ENSG00000198830	chr1:26800018-26800194	0.20681
SLC25A22	ENSG00000177542	chr11:795169-798217	-0.497834
HIPK3	ENSG00000110422	chr11:33369559-33370068	-0.246464
ZNF224	ENSG00000267680	chr19:44598683-44598684	-0.298182
ERICH1	ENSG00000104714	chr8:642612-665861	-0.163603
RBM28	ENSG00000106344	chr7:127975733-127975901	0.242141
MARK3	ENSG00000075413	chr14:103958371-103964839	0.130213
GZF1	ENSG00000125812	chr20:23346384-23349399	0.101067
NCOR2	ENSG00000196498	chr12:124831396-124832371	-0.149384
CCDC74B	ENSG00000152076	chr2:130900886-130906282	0.248101
FOSL1	ENSG00000175592	chr11:65664477-65667712	-0.317489
MEF2D	ENSG00000116604	chr1:156469352-156470278	0.202387
RNF135	ENSG00000181481	chr17:29311778-29314962	-0.200803
EHBP1L1	ENSG00000173442	chr11:65349487-65349488	-0.130688
ELF3	ENSG00000163435	chr1:201979834-201980257	-0.126599
CENPV	ENSG00000166582	chr17:16252647-16253245	-0.210107
FBXW10	ENSG00000171931	chr17:18653450-18654244	-0.176439
COX5B	ENSG00000135940	chr2:98263129-98263530	0.218583
ENSG00000243452	ENSG00000243452	chr1:148568877-148577358	0.263209
FTSJ2	ENSG00000122687	chr7:2275199-2279053	-0.215605
NR1D2	ENSG00000174738	chr3:24004096-24006468	-0.217699
AKR1B15	ENSG00000227471	chr7:134249521-134252910	-0.462762
SETD5	ENSG00000168137	chr3:9477590-9482140	-0.248666
C7orf55-LUC7L2	ENSG00000146963	chr7:139045068-139060808	-0.155663
ZBTB25	ENSG00000089775	chr14:64954775-64957079	-0.318438
EIF5	ENSG00000100664	chr14:103800597-103800726	-0.168806
TMEM91	ENSG00000142046	chr19:41888826-41888827	-0.186812
DDX3Y	ENSG00000067048	chrY:15026561-15026796	-0.116744
PNISR	ENSG00000132424	chr6:99848187-99848188	-0.252299
GORAB	ENSG00000120370	chr1:170501425-170508351	-0.281214
CPNE1	ENSG00000214078	chr20:34243266-34246852	-0.271371
GPCPD1	ENSG00000125772	chr20:5564968-5573973	-0.310336
CALCOCO1	ENSG00000012822	chr12:54106343-54106344	-0.128595
SEMA4F	ENSG00000135622	chr2:74884751-74889859	-0.17509
TMEM168	ENSG00000146802	chr7:112425008-112430215	-0.191826
LINC01234	ENSG00000249550	chr12:114184400-114204880	-0.110484
ZDHHC7	ENSG00000153786	chr16:85029613-85044892	-0.193843
ANKRD13D	ENSG00000172932	chr11:67059651-67067001	-0.175185
LPIN1	ENSG00000134324	chr2:11916319-11919645	0.137066
TSEN54	ENSG00000182173	chr17:73518414-73519356	-0.247403
UBE2J2	ENSG00000160087	chr1:1203372-1209046	-0.282346
PPP1R18	ENSG00000146112	chr6:30654890-30654891	0.145515
TRNT1	ENSG00000072756	chr3:3189871-3190778	0.303505
ASPHD1	ENSG00000174939	chr16:29912062-29912873	-0.147813
CENPN	ENSG00000166451	chr16:81053881-81056360	0.195171
FKBP10	ENSG00000141756	chr17:39975927-39975928	-0.107245
ASXL1	ENSG00000171456	chr20:31017856-31019124	-0.274104
ANXA13	ENSG00000104537	chr8:124724993-124749560	0.105379
TAOK2	ENSG00000149930	chr16:29998164-29998165	-0.111344
NCAPD2	ENSG00000010292	chr12:6603258-6603259	-0.276408
RP11-44N21.1	ENSG00000257556	chr14:105561876-105561877	-0.211569
CEP170	ENSG00000143702	chr1:243289436-243289437	-0.105695
PLCG1	ENSG00000124181	chr20:39791632-39791843	0.299481
DNTTIP2	ENSG00000067334	chr1:94343418-94344633	-0.164837
WDR20	ENSG00000140153	chr14:102606509-102661275	-0.134895
PPP1R18	ENSG00000146112	chr6:30653823-30654891	-0.152602
POLB	ENSG00000070501	chr8:42212039-42213034	0.247664
CMC2	ENSG00000103121	chr16:81031034-81031890	0.257751
CCNT2	ENSG00000082258	chr2:135703716-135705306	-0.296664
ZNF655	ENSG00000197343	chr7:99169415-99169868	0.294395
BCL2L11	ENSG00000153094	chr2:111907724-111921710	-0.35051
LINC01021	ENSG00000250337	chr5:27477908-27494342	-0.501948
SAMD4B	ENSG00000179134	chr19:39833216-39844646	-0.234982
ENSG00000225241	ENSG00000225241	chr1:144598780-144606369	-0.233312
SNIP1	ENSG00000163877	chr1:38006356-38018246	-0.172154
PHPT1	ENSG00000054148	chr9:139744954-139744955	-0.238457
RALA	ENSG00000006451	chr7:39663424-39726230	-0.169453
PGP	ENSG00000184207	chr16:2263581-2263582	-0.294274
POM121	ENSG00000196313	chr7:72411055-72411356	-0.147614
FXR2	ENSG00000129245	chr17:7495243-7495572	-0.146481
C20orf196	ENSG00000171984	chr20:5753689-5843670	-0.287877
PRPF4B	ENSG00000112739	chr6:4061934-4062447	-0.133959
ITGA2B	ENSG00000005961	chr17:42451838-42452027	-0.365456
SLC25A36	ENSG00000114120	chr3:140682069-140689769	-0.246671
NCOR1	ENSG00000141027	chr17:16052831-16055260	-0.197442
DYRK1B	ENSG00000105204	chr19:40322608-40324663	-0.205897
L3HYPDH	ENSG00000126790	chr14:59941244-59941245	-0.279686
MBP	ENSG00000197971	chr18:74817242-74844536	-0.203992
AVIL	ENSG00000135407	chr12:58204910-58207010	-0.254101
MANBA	ENSG00000109323	chr4:103595227-103610731	-0.263817
CCDC92	ENSG00000119242	chr12:124428911-124457076	-0.264999
FOCAD	ENSG00000188352	chr9:20658825-20715321	-0.192422
ZBTB5	ENSG00000168795	chr9:37442552-37465212	-0.217778
NCOR2	ENSG00000196498	chr12:124829497-124831110	-0.155265
NR1D2	ENSG00000174738	chr3:24004096-24006468	-0.254583
PCMTD2	ENSG00000203880	chr20:62890235-62891295	0.381424
DUSP22	ENSG00000112679	chr6:311962-345854	-0.28181
SLC25A29	ENSG00000197119	chr14:100759714-100765179	-0.20677
PHF23	ENSG00000040633	chr17:7140979-7144125	0.216302
EXOC7	ENSG00000182473	chr17:74085401-74090495	-0.125044
ICE1	ENSG00000164151	chr5:5448010-5454665	-0.170389
ELMO2	ENSG00000062598	chr20:45016076-45017678	-0.11176
TMEM91	ENSG00000142046	chr19:41888826-41889791	-0.26385
COL27A1	ENSG00000196739	chr9:117008190-117012895	-0.210448
NAB2	ENSG00000166886	chr12:57486978-57488395	0.384244
STAG3L1	ENSG00000205583	chr7:74995707-74996018	-0.243747
LYSMD3	ENSG00000176018	chr5:89821117-89825265	-0.223563
DAPK3	ENSG00000167657	chr19:3969827-3971020	-0.171174
MSANTD3	ENSG00000066697	chr9:103204638-103212839	-0.148036
CEBPZOS	ENSG00000218739	chr2:37425815-37426847	0.124845
ITGB4	ENSG00000132470	chr17:73739942-73744922	-0.12095
CCT6P1	ENSG00000228409	chr7:65225543-65227934	-0.243329
CUZD1	ENSG00000138161	chr10:124615302-124639001	-0.271405
NFE2L2	ENSG00000116044	chr2:178098999-178129260	-0.198983
SPDL1	ENSG00000040275	chr5:169010893-169015398	-0.168406
ZSCAN2	ENSG00000176371	chr15:85147564-85159540	0.261159
GGCX	ENSG00000115486	chr2:85788108-85788509	-0.231003
ENTHD2	ENSG00000167302	chr17:79205821-79206115	-0.140745
REEP4	ENSG00000168476	chr8:21996306-21996929	0.100918
RIPK4	ENSG00000183421	chr21:43164300-43165919	-0.102829
SLU7	ENSG00000164609	chr5:159842317-159846030	-0.121406
LIPE-AS1	ENSG00000213904	chr19:42901376-42912410	0.157001
UBAP2L	ENSG00000143569	chr1:154241430-154242676	-0.129311
USP42	ENSG00000106346	chr7:6155154-6175472	-0.312678
ZBTB38	ENSG00000177311	chr3:141105779-141122769	-0.214382
DNAJB6	ENSG00000105993	chr7:157202695-157208710	-0.142018
EML3	ENSG00000149499	chr11:62376949-62377101	-0.177403
SRSF11	ENSG00000116754	chr1:70694238-70697542	-0.375908
PDGFA	ENSG00000197461	chr7:538211-540753	-0.14609
CTC-260F20.3	ENSG00000258674	chr19:19639495-19640173	0.605741
RBM48	ENSG00000127993	chr7:92164284-92166165	-0.366775
C17orf61-PLSCR3	ENSG00000262481	chr17:7296271-7296463	-0.210014
USP12	ENSG00000152484	chr13:27744466-27745729	0.379894
PLCG1	ENSG00000124181	chr20:39791632-39791843	0.221497
LRRC23	ENSG00000010626	chr12:7019190-7023055	0.106952
GGT1	ENSG00000100031	chr22:25003699-25003921	0.15442
CBX4	ENSG00000141582	chr17:77809511-77811636	-0.154784
C1orf52	ENSG00000162642	chr1:85724744-85725041	-0.13489
ZCCHC2	ENSG00000141664	chr18:60242159-60242160	-0.212045
INTS2	ENSG00000108506	chr17:59958532-59962262	-0.114715
ATXN7L1	ENSG00000146776	chr7:105515680-105516258	0.219342
SIRT7	ENSG00000187531	chr17:79872406-79872480	-0.188433
RNF145	ENSG00000145860	chr5:158585434-158585848	0.160123
ISCU	ENSG00000136003	chr12:108956512-108957836	0.310595
GCN1L1	ENSG00000089154	chr12:120606104-120607973	-0.183478
U2AF1L4	ENSG00000161265	chr19:36235322-36236026	-0.128244
FBXO22	ENSG00000167196	chr15:76196970-76205544	-0.162259
PHC2	ENSG00000134686	chr1:33799893-33815198	-0.232032
IQCB1	ENSG00000173226	chr3:121507279-121508920	0.102579
TECR	ENSG00000099797	chr19:14675670-14675761	-0.395874
AKR1B15	ENSG00000227471	chr7:134234001-134249350	-0.278927
DCAF10	ENSG00000122741	chr9:37854979-37857238	0.186061
WDR33	ENSG00000136709	chr2:128520733-128522402	0.170158
INSIG1	ENSG00000186480	chr7:155094556-155099951	-0.166191
EIF4H	ENSG00000106682	chr7:73604248-73609071	-0.26541
SPIN1	ENSG00000106723	chr9:91003453-91041297	-0.261148
BICC1	ENSG00000122870	chr10:60580228-60588521	-0.151714
CROCCP2	ENSG00000215908	chr1:16952994-16953640	-0.228382
AMBRA1	ENSG00000110497	chr11:46564531-46564532	-0.199743
ARRDC2	ENSG00000105643	chr19:18112382-18119520	-0.287478
HSD11B1L	ENSG00000167733	chr19:5684916-5690042	0.290547
C7orf55-LUC7L2	ENSG00000146963	chr7:139045068-139060808	-0.263058
FNBP4	ENSG00000109920	chr11:47746330-47747289	0.35771
TRAF4	ENSG00000076604	chr17:27071273-27074231	-0.136834
SRSF1	ENSG00000136450	chr17:56082402-56083162	-0.203459
AHI1	ENSG00000135541	chr6:135606785-135621638	-0.10362
SOCS4	ENSG00000180008	chr14:55494189-55509670	-0.329207
ADAM15	ENSG00000143537	chr1:155033965-155034721	0.291346
AHI1	ENSG00000135541	chr6:135621696-135639657	-0.248326
ZSWIM8	ENSG00000214655	chr10:75555421-75556532	-0.122679
MARK3	ENSG00000075413	chr14:103958371-103969219	-0.116578
NEAT1	ENSG00000245532	chr11:65191007-65191008	-0.161689
KLHL18	ENSG00000114648	chr3:47324584-47328710	0.406935
TAF3	ENSG00000165632	chr10:8051293-8055694	-0.398223
VEGFA	ENSG00000112715	chr6:43749824-43752278	0.187423
SNX14	ENSG00000135317	chr6:86246642-86251703	-0.115464
EIF4A2	ENSG00000156976	chr3:186505671-186506914	-0.255187
AGER	ENSG00000204305	chr6:32149016-32149301	0.222918
STIL	ENSG00000123473	chr1:47746617-47746618	-0.316296
AGTPBP1	ENSG00000135049	chr9:88270235-88272350	-0.102817
SUGP2	ENSG00000064607	chr19:19104270-19104271	-0.246123
CNTNAP3B	ENSG00000154529	chr9:43908523-43915360	-0.433907
GLE1	ENSG00000119392	chr9:131267183-131271155	-0.157038
SVIL	ENSG00000197321	chr10:29820217-29839526	-0.264348
ZSWIM7	ENSG00000214941	chr17:15880406-15880407	-0.120822
RWDD3	ENSG00000122481	chr1:95699871-95712098	0.347977
TANK	ENSG00000136560	chr2:162017923-162036125	-0.323231
DPP8	ENSG00000074603	chr15:65804902-65807994	0.124135
RP11-462L8.1	ENSG00000229656	chr10:33274685-33370270	-0.116331
CSRNP1	ENSG00000144655	chr3:39188213-39196067	-0.122433
RIMKLB	ENSG00000166532	chr12:8932708-8932709	-0.496868
FUBP3	ENSG00000107164	chr9:133455151-133470870	-0.12642
TM2D2	ENSG00000169490	chr8:38852924-38853732	0.101853
CLK4	ENSG00000113240	chr5:178044435-178045557	0.281886
NR4A1	ENSG00000123358	chr12:52445352-52448111	-0.123439
BIN1	ENSG00000136717	chr2:127821594-127826500	-0.111947
NEK9	ENSG00000119638	chr14:75590926-75593406	-0.219084
PHF12	ENSG00000109118	chr17:27240295-27240897	-0.12589
C6orf141	ENSG00000197261	chr6:49519003-49519594	0.413666
LINC01021	ENSG00000250337	chr5:27475802-27476194	-0.157161
YTHDF1	ENSG00000149658	chr20:61835159-61845216	-0.112788
DMPK	ENSG00000104936	chr19:46283127-46285451	-0.173719
SNRPA	ENSG00000077312	chr19:41256882-41256883	-0.254765
NPFF	ENSG00000139574	chr12:53900926-53900927	-0.358783
TROAP	ENSG00000135451	chr12:49717820-49719284	-0.16644
MTSS1L	ENSG00000132613	chr16:70708335-70710784	-0.107939
IP6K2	ENSG00000068745	chr3:48728915-48730387	-0.256311
TAF1D	ENSG00000166012	chr11:93466563-93467791	-0.227492
SYVN1	ENSG00000162298	chr11:64896186-64897201	-0.196185
VTI1A	ENSG00000151532	chr10:114207225-114208640	-0.356187
SRSF1	ENSG00000136450	chr17:56081079-56082284	0.242054
ERRFI1	ENSG00000116285	chr1:8075752-8086218	-0.149983
CCNL1	ENSG00000163660	chr3:156874872-156876655	-0.208978
POLG2	ENSG00000256525	chr17:62479116-62481845	-0.245962
DNAJC9	ENSG00000213551	chr10:75007566-75007567	-0.263843
TBRG4	ENSG00000136270	chr7:45144308-45145040	-0.182887
GOLGA8B	ENSG00000215252	chr15:34825346-34825347	-0.372057
C9orf3	ENSG00000148120	chr9:97778261-97781732	-0.25246
ACIN1	ENSG00000100813	chr14:23540395-23540636	0.198823
C1RL	ENSG00000139178	chr12:7249759-7252282	-0.256118
CREM	ENSG00000095794	chr10:35416121-35437296	-0.295111
TANK	ENSG00000136560	chr2:161993574-162036125	-0.195046
C14orf159	ENSG00000133943	chr14:91611657-91614125	0.254299
SSR4	ENSG00000180879	chrX:153061259-153061383	-0.279702
BAG6	ENSG00000204463	chr6:31612191-31612302	-0.104709
RP11-112J3.16	ENSG00000227388	chr9:35786772-35790153	-0.103879
KLF16	ENSG00000129911	chr19:1854759-1863040	-0.459706
NASP	ENSG00000132780	chr1:46072263-46078841	-0.166818
LRP8	ENSG00000157193	chr1:53723136-53723991	-0.127589
POM121	ENSG00000196313	chr7:72411532-72412376	-0.124016
CRTC2	ENSG00000160741	chr1:153927642-153930821	-0.376362
PVT1	ENSG00000249859	chr8:129001537-129021836	-0.316902
KLF6	ENSG00000067082	chr10:3824406-3827105	-0.222385
ACAP3	ENSG00000131584	chr1:1230008-1230827	0.283186
CCNT2	ENSG00000082258	chr2:135700244-135703357	0.254018
HAUS2	ENSG00000137814	chr15:42851606-42853468	-0.187387
MTCL1	ENSG00000168502	chr18:8809559-8809969	0.507845
TAB3	ENSG00000157625	chrX:30873679-30877604	-0.208008
ALDOC	ENSG00000109107	chr17:26902562-26903819	-0.31141
SDHAF4	ENSG00000154079	chr6:71289269-71298318	-0.267769
HMGCR	ENSG00000113161	chr5:74633125-74638408	-0.186742
LRP10	ENSG00000197324	chr14:23347779-23348408	0.293472
TBX3	ENSG00000135111	chr12:115117456-115117718	0.308096
LRRC28	ENSG00000168904	chr15:99796330-99827462	0.210149
USP36	ENSG00000055483	chr17:76792398-76792399	-0.195805
KIAA0907	ENSG00000132680	chr1:155884111-155885664	0.21845
RPSA	ENSG00000168028	chr3:39452851-39453140	0.458649
LENG8	ENSG00000167615	chr19:54969700-54969701	-0.246042
AARSD1	ENSG00000266967	chr17:41103911-41106893	-0.206596
MECP2	ENSG00000169057	chrX:153296737-153296847	0.165201
QSER1	ENSG00000060749	chr11:32956981-32975403	-0.355005
DENR	ENSG00000139726	chr12:123238354-123246734	-0.444016
PUF60	ENSG00000179950	chr8:144900704-144903767	-0.197096
CENPBD1P1	ENSG00000213753	chr19:59086955-59097522	-0.248007
OSER1	ENSG00000132823	chr20:42835638-42839336	-0.187127
LHFPL2	ENSG00000145685	chr5:77784976-77805607	-0.233774
BAZ1A	ENSG00000198604	chr14:35255207-35261981	0.101551
GZF1	ENSG00000125812	chr20:23349566-23350221	-0.186976
RBMX	ENSG00000147274	chrX:135954504-135955405	0.434696
FNBP4	ENSG00000109920	chr11:47746330-47752926	-0.304128
PIGF	ENSG00000151665	chr2:46808730-46819614	-0.268762
FAM217B	ENSG00000196227	chr20:58517567-58518995	-0.202944
CTIF	ENSG00000134030	chr18:46386800-46387588	0.383278
ERI2	ENSG00000196678	chr16:20809533-20810585	0.42527
IDS	ENSG00000241489	chrX:148582568-148585687	0.298705
CCDC74B	ENSG00000152076	chr2:130897944-130898731	0.194923
ENSG00000184886	ENSG00000184886	chr17:34891440-34892943	-0.246765
KIF1B	ENSG00000054523	chr1:10357304-10363221	0.303671
TMUB2	ENSG00000168591	chr17:42265111-42266303	-0.158099
DGKD	ENSG00000077044	chr2:234328067-234343026	-0.200364
MOAP1	ENSG00000165943	chr14:93651058-93651155	-0.232249
MALAT1	ENSG00000251562	chr11:65270107-65270108	-0.479441
CLDND1	ENSG00000080822	chr3:98240286-98240497	0.193213
GLG1	ENSG00000090863	chr16:74486029-74487069	0.106506
PANK1	ENSG00000152782	chr10:91353746-91359009	-0.24543
ZCCHC2	ENSG00000141664	chr18:60242530-60242531	-0.261108
CLASP1	ENSG00000074054	chr2:122166623-122168442	0.194199
RPRD2	ENSG00000163125	chr1:150444358-150444359	-0.251092
CCDC92	ENSG00000119242	chr12:124430347-124432458	0.487012
PIGA	ENSG00000165195	chrX:15344168-15349338	-0.204771
ASXL1	ENSG00000171456	chr20:30956926-31015931	-0.251872
CARD8	ENSG00000105483	chr19:48735750-48737086	0.161665
REV3L	ENSG00000009413	chr6:111628773-111631056	-0.285558
ASIC3	ENSG00000213199	chr7:150747695-150747696	-0.125879
PPP1R35	ENSG00000160813	chr7:100033156-100033471	0.141638
SPG7	ENSG00000197912	chr16:89599044-89611056	-0.200314
STIL	ENSG00000123473	chr1:47746035-47746618	0.300384
NCOR2	ENSG00000196498	chr12:124825297-124826369	-0.194886
KIFC3	ENSG00000140859	chr16:57819578-57822487	0.222749
C16orf13	ENSG00000130731	chr16:685063-685064	-0.187348
ZNF274	ENSG00000171606	chr19:58721439-58722926	-0.213381
LARP6	ENSG00000166173	chr15:71128844-71146228	-0.29788
RSRP1	ENSG00000117616	chr1:25568917-25568918	-0.301003
SETD5	ENSG00000168137	chr3:9470693-9475529	-0.192504
MTHFD2L	ENSG00000163738	chr4:75026487-75026488	-0.416566
ARL14EP	ENSG00000152219	chr11:30344749-30354413	0.167151
PDLIM5	ENSG00000163110	chr4:95445026-95494502	-0.18001
SETD5	ENSG00000168137	chr3:9510259-9512143	-0.324827
ZNF267	ENSG00000185947	chr16:31896577-31901528	0.269736
PPIP5K2	ENSG00000145725	chr5:102515889-102520373	-0.220941
KCTD6	ENSG00000168301	chr3:58477896-58484440	-0.397978
MTCL1	ENSG00000168502	chr18:8807058-8812977	-0.100783
MTERF3	ENSG00000156469	chr8:97270928-97273729	-0.195673
XPO1	ENSG00000082898	chr2:61749818-61753555	-0.112089
MTCL1	ENSG00000168502	chr18:8807058-8812977	-0.273833
WWC3	ENSG00000047644	chrX:9983898-10031485	-0.281871
CTD-2354A18.1	ENSG00000261780	chr18:70999816-71016319	-0.140576
HSD11B1L	ENSG00000167733	chr19:5685130-5685313	0.40887
NFKBIZ	ENSG00000144802	chr3:101568761-101570929	-0.310891
PIEZO1	ENSG00000103335	chr16:88783619-88785982	-0.220309
SNX4	ENSG00000114520	chr3:125188363-125195539	-0.205603
CARD8	ENSG00000105483	chr19:48735750-48737660	-0.315601
CROCCP2	ENSG00000215908	chr1:16952500-16953640	0.192589
NUP50	ENSG00000093000	chr22:45564127-45567481	-0.226543
EIF4A2	ENSG00000156976	chr3:186505671-186506914	-0.282906
ARL16	ENSG00000214087	chr17:79649449-79649450	-0.276193
CAPN15	ENSG00000103326	chr16:583998-596817	-0.10739
BCL2L13	ENSG00000099968	chr22:18189591-18209443	0.182295
MEF2D	ENSG00000116604	chr1:156450763-156452229	-0.119102
SERTAD3	ENSG00000167565	chr19:40947993-40950122	-0.235443
SCO2	ENSG00000130489	chr22:50962853-50963901	-0.390253
IFNGR2	ENSG00000159128	chr21:34775922-34787195	-0.115418
TAF1D	ENSG00000166012	chr11:93466585-93467791	0.22889
ZNF720	ENSG00000197302	chr16:31724756-31733947	-0.196827
CEBPZOS	ENSG00000218739	chr2:37428869-37429006	-0.133459
pk	ENSG00000091436	chr2:174081978-174085878	0.169861
STRN3	ENSG00000196792	chr14:31382863-31398407	-0.146262
ARL16	ENSG00000214087	chr17:79649179-79649180	-0.138823
PUF60	ENSG00000179950	chr8:144902886-144903767	0.208859
RAB30-AS1	ENSG00000246067	chr11:82784489-82802295	-0.620635
ARL4C	ENSG00000188042	chr2:235404622-235404623	-0.217496
INCENP	ENSG00000149503	chr11:61908516-61912454	-0.109414
MNX1	ENSG00000130675	chr7:156798567-156799173	-0.269093
OSMR	ENSG00000145623	chr5:38904605-38905234	0.133156
CHD2	ENSG00000173575	chr15:93536228-93540187	-0.352008
SPAG7	ENSG00000091640	chr17:4869614-4869696	-0.233511
RNASEK	ENSG00000219200	chr17:6916080-6916638	0.111493
ZNF513	ENSG00000163795	chr2:27603115-27603339	-0.219581
EOGT	ENSG00000163378	chr3:69061950-69062725	-0.105934
MFF	ENSG00000168958	chr2:228190143-228193394	-0.152095
SPATA6L	ENSG00000106686	chr9:4654804-4656041	0.369255
CHD2	ENSG00000173575	chr15:93536228-93540187	-0.365322
SPDL1	ENSG00000040275	chr5:169010893-169015398	-0.233924
AKR1C2	ENSG00000151632	chr10:5046206-5048162	0.132027
UBE2G2	ENSG00000184787	chr21:46193602-46197214	-0.226563
GPBP1	ENSG00000062194	chr5:56531859-56542127	-0.413262
PKD1P6	ENSG00000270580	chr16:15212911-15219548	-0.152623
MFHAS1	ENSG00000147324	chr8:8643565-8654875	-0.255424
CHSY1	ENSG00000131873	chr15:101719185-101728198	0.15686
ABCD4	ENSG00000119688	chr14:74764772-74766251	0.223156
NLK	ENSG00000087095	chr17:26523205-26523206	-0.328855
EIF2AK2	ENSG00000055332	chr2:37376082-37384051	0.189094
HMGCS1	ENSG00000112972	chr5:43307926-43313458	-0.113746
WDR73	ENSG00000177082	chr15:85189203-85189204	-0.213095
EML3	ENSG00000149499	chr11:62376604-62376826	-0.160246
VPS29	ENSG00000111237	chr12:110936664-110936665	-0.372447
PPIP5K2	ENSG00000145725	chr5:102515889-102520373	-0.217536
SETD5	ENSG00000168137	chr3:9439661-9466151	-0.138315
FAM179B	ENSG00000198718	chr14:45515906-45521639	-0.198218
COX11	ENSG00000166260	chr17:53029473-53031022	0.312348
PPIP5K2	ENSG00000145725	chr5:102520445-102522021	0.111367
PRR5	ENSG00000186654	chr22:45126884-45127610	0.342413
TIAL1	ENSG00000151923	chr10:121336262-121336592	0.141104
SNHG1	ENSG00000255717	chr11:62622023-62622605	0.239461
CSNK2B-LY6G5B--991	ENSG00000263020	chr6:31638785-31638933	0.399541
NT5C3A	ENSG00000122643	chr7:33066527-33102180	-0.448167
MRPL50	ENSG00000136897	chr9:104151769-104151770	-0.288845
PPM1A	ENSG00000100614	chr14:60716395-60749402	-0.307993
TSEN54	ENSG00000182173	chr17:73518414-73519356	-0.247325
NME4	ENSG00000103202	chr16:448394-448395	-0.186468
ZZZ3	ENSG00000036549	chr1:78050340-78097535	-0.263637
ERRFI1	ENSG00000116285	chr1:8074456-8075368	-0.13946
RP11-452F19.3	ENSG00000228106	chr1:222997287-223000770	0.159697
EIF4H	ENSG00000106682	chr7:73604248-73609071	-0.259178
SRSF7	ENSG00000115875	chr2:38975795-38976671	0.153671
ASB1	ENSG00000065802	chr2:239344654-239352983	-0.190696
RPARP-AS1	ENSG00000269609	chr10:104210775-104215094	0.228817
LRR1	ENSG00000165501	chr14:50069186-50080974	0.184153
NCOR2	ENSG00000196498	chr12:124819826-124820029	-0.105931
EXOC2	ENSG00000112685	chr6:637861-693019	-0.159104
C5orf51	ENSG00000205765	chr5:41904569-41907838	-0.140275
HSF4	ENSG00000102878	chr16:67201305-67201378	-0.14961
GPCPD1	ENSG00000125772	chr20:5564968-5573973	-0.369031
C9orf91	ENSG00000157693	chr9:117405679-117405680	-0.138618
ZFPM2-AS1	ENSG00000251003	chr8:106810670-106939879	-0.119228
GINS4	ENSG00000147536	chr8:41387817-41393879	-0.133897
BCL2L11	ENSG00000153094	chr2:111881537-111881538	-0.138283
IL11	ENSG00000095752	chr19:55879937-55880137	-0.357707
ADCK4	ENSG00000123815	chr19:41220540-41222492	0.115489
RLTPR	ENSG00000159753	chr16:67690548-67691142	0.485361
SSH2	ENSG00000141298	chr17:28001177-28003838	0.317551
MGAT5B	ENSG00000167889	chr17:74928857-74934070	0.268669
ZNF274	ENSG00000171606	chr19:58718568-58721327	-0.32719
FBXO9	ENSG00000112146	chr6:52958114-52958115	-0.189556
PKD1P1	ENSG00000244257	chr16:16411634-16412780	0.250011
RHBDD2	ENSG00000005486	chr7:75508578-75511147	0.172885
LINC01089	ENSG00000212694	chr12:122234148-122237753	-0.157096
SCML1	ENSG00000047634	chrX:17762339-17762340	-0.68864
TMEM256-PLSCR3	ENSG00000187838	chr17:7296683-7296786	-0.205241
STRN3	ENSG00000196792	chr14:31388312-31404369	-0.296873
ENDOV	ENSG00000173818	chr17:78403631-78409933	-0.263959
ZNF783	ENSG00000204946	chr7:148959448-148963426	-0.152346
ERF	ENSG00000105722	chr19:42753890-42753979	-0.128638
HECTD4	ENSG00000173064	chr12:112598448-112598666	0.313116
TMEM107	ENSG00000179029	chr17:8077590-8079518	-0.261684
KANSL2	ENSG00000139620	chr12:49075424-49075970	-0.253789
CYTH1	ENSG00000108669	chr17:76705814-76732774	-0.261668
LINC00342	ENSG00000232931	chr2:96479893-96479894	-0.380168
TMEM147-AS1	ENSG00000236144	chr19:36032652-36032653	-0.247076
EPC1	ENSG00000120616	chr10:32562209-32573626	-0.290815
RSRC2	ENSG00000111011	chr12:123006846-123011395	-0.266334
FGFR1OP2	ENSG00000111790	chr12:27110676-27116275	-0.283869
GRAMD1A	ENSG00000089351	chr19:35491390-35500023	-0.175228
ZRANB2	ENSG00000132485	chr1:71531435-71531436	-0.272024
RSRC2	ENSG00000111011	chr12:123003576-123005932	-0.221531
MAN2A2	ENSG00000196547	chr15:91455509-91455772	-0.130774
IL11	ENSG00000095752	chr19:55880309-55881672	-0.389786
TUBB2B	ENSG00000137285	chr6:3226903-3231791	0.154314
CDK5R1	ENSG00000176749	chr17:30815104-30815105	-0.444363
WHSC1L1	ENSG00000147548	chr8:38137199-38139018	-0.207575
CD44	ENSG00000026508	chr11:35211612-35226059	-0.558432
FADS3	ENSG00000221968	chr11:61644249-61644250	-0.214903
LINC01021	ENSG00000250337	chr5:27477908-27494226	0.126129
BCL2L2-PABPN1	ENSG00000258643	chr14:23777408-23788944	-0.213419
LINC00342	ENSG00000232931	chr2:96480418-96480419	-0.453662
CAB39	ENSG00000135932	chr2:231577945-231624674	-0.246429
AGAP3	ENSG00000133612	chr7:150837203-150838985	-0.2087
PHC2	ENSG00000134686	chr1:33799893-33800767	0.379283
CLK1	ENSG00000013441	chr2:201724469-201724848	0.442538
GAS2L1	ENSG00000185340	chr22:29706988-29707452	-0.233112
INSIG1	ENSG00000186480	chr7:155094556-155099951	-0.158734
BAZ2B	ENSG00000123636	chr2:160269056-160284822	-0.27932
ARGLU1	ENSG00000134884	chr13:107209479-107211780	-0.281084
RGL2	ENSG00000237441	chr6:33266428-33267157	0.362121
PAN2	ENSG00000135473	chr12:56716542-56716846	-0.194971
SPECC1	ENSG00000128487	chr17:20059549-20107646	-0.302654
TEAD2	ENSG00000074219	chr19:49858676-49860509	-0.211725
ENSG00000138041	ENSG00000138041	chr2:55800913-55804451	-0.110204
BAZ1B	ENSG00000009954	chr7:72856510-72856511	-0.261127
SPDL1	ENSG00000040275	chr5:169015579-169018052	-0.213003
MALAT1	ENSG00000251562	chr11:65269864-65269865	-0.155599
CELF1	ENSG00000149187	chr11:47490443-47490444	-0.251907
KIAA1217	ENSG00000120549	chr10:24834032-24834756	0.423725
STK19	ENSG00000204344	chr6:31939993-31940079	0.224375
CPT1B	ENSG00000205560	chr22:51015463-51015785	-0.159019
DNAJC25	ENSG00000059769	chr9:114394023-114405137	-0.551326
PRKAG1	ENSG00000181929	chr12:49406893-49412515	-0.243247
NCOR2	ENSG00000196498	chr12:124824989-124826369	0.176397
THAP5	ENSG00000177683	chr7:108206466-108209934	-0.250376
BTN2A2	ENSG00000124508	chr6:26383527-26384020	0.389842
HMGN2	ENSG00000198830	chr1:26800018-26800194	0.151857
POLR2B	ENSG00000047315	chr4:57873168-57876527	-0.130297
MGRN1	ENSG00000102858	chr16:4733933-4738797	-0.108708
KIAA0895	ENSG00000164542	chr7:36374787-36375763	0.254548
ZSWIM7	ENSG00000214941	chr17:15880406-15880560	0.326321
MLLT10	ENSG00000078403	chr10:21827841-21875223	-0.119495
PTPN3	ENSG00000070159	chr9:112219495-112219572	-0.148052
SDF2	ENSG00000132581	chr17:26982501-26989064	-0.433051
RAP1GAP	ENSG00000076864	chr1:21929406-21930328	0.25394
CTIF	ENSG00000134030	chr18:46386800-46387588	0.474333
MATR3	ENSG00000015479	chr5:138615077-138615078	-0.194194
SP100	ENSG00000067066	chr2:231375881-231379810	-0.216141
MVD	ENSG00000167508	chr16:88725128-88729419	-0.117036
PLOD2	ENSG00000152952	chr3:145794682-145795649	0.102615
SERTAD3	ENSG00000167565	chr19:40947993-40950122	-0.167719
ZNF638	ENSG00000075292	chr2:71607695-71623271	-0.150063
MAPRE2	ENSG00000166974	chr18:32585517-32650159	-0.121769
PHF12	ENSG00000109118	chr17:27254081-27277083	-0.194553
DMTF1	ENSG00000135164	chr7:86797359-86800311	0.246246
TRPM7	ENSG00000092439	chr15:50878685-50881789	-0.250513
PANK1	ENSG00000152782	chr10:91353746-91359009	-0.185574
SMC6	ENSG00000163029	chr2:17927218-17934893	-0.228454
PSMA3-AS1	ENSG00000257621	chr14:58740728-58758353	-0.19114
EML3	ENSG00000149499	chr11:62379068-62379908	-0.186384
NCOA7	ENSG00000111912	chr6:126236626-126242089	-0.244994
PTHLH	ENSG00000087494	chr12:28122449-28122614	0.185962
ALDOC	ENSG00000109107	chr17:26902562-26903819	-0.424277
CYP4F3	ENSG00000186529	chr19:15757915-15758007	0.226948
RIMKLB	ENSG00000166532	chr12:8930398-8933171	-0.301172
TMEM147-AS1	ENSG00000236144	chr19:36032486-36032653	0.225946
TAOK2	ENSG00000149930	chr16:29997825-29997826	-0.242681
STIM2	ENSG00000109689	chr4:27019606-27024141	-0.280582
BIN1	ENSG00000136717	chr2:127815177-127816587	-0.116382
INTS10	ENSG00000104613	chr8:19703308-19709160	-0.177067
THUMPD2	ENSG00000138050	chr2:39984508-39988471	-0.10075
ACIN1	ENSG00000100813	chr14:23538826-23540334	0.13025
ENTPD6	ENSG00000197586	chr20:25201969-25203474	0.103097
PARP6	ENSG00000137817	chr15:72559163-72559816	0.265786
RIPK4	ENSG00000183421	chr21:43166931-43169314	-0.217293
NT5C3A	ENSG00000122643	chr7:33075600-33080484	0.637864
ATG2B	ENSG00000066739	chr14:96752322-96755993	-0.105787
C11orf73	ENSG00000149196	chr11:86056135-86056136	-0.29967
BAIAP2L2	ENSG00000128298	chr22:38483271-38493039	0.189857
GLI4	ENSG00000250571	chr8:144357147-144357148	-0.271145
HNRNPA1	ENSG00000135486	chr12:54678101-54680446	-0.774538
KMT2D	ENSG00000167548	chr12:49416658-49418361	-0.181242
NSUN5P1	ENSG00000223705	chr7:75042210-75043918	-0.161968
FUBP1	ENSG00000162613	chr1:78412261-78412262	-0.35804
GSK3A	ENSG00000105723	chr19:42734543-42734831	0.208081
PXN	ENSG00000089159	chr12:120662180-120703420	-0.112351
KIAA0907	ENSG00000132680	chr1:155884111-155885664	0.215996
SIRT7	ENSG00000187531	chr17:79870490-79871083	0.518582
TTC31	ENSG00000115282	chr2:74719874-74720049	-0.159069
SCML1	ENSG00000047634	chrX:17755800-17762191	0.394987
MBTD1	ENSG00000011258	chr17:49272722-49278953	-0.102941
TINF2	ENSG00000092330	chr14:24709269-24709270	-0.201215
RAB11FIP3	ENSG00000090565	chr16:539000-546824	-0.135725
TAOK2	ENSG00000149930	chr16:30001126-30002105	-0.222489
C2orf49	ENSG00000135974	chr2:105959431-105959432	-0.265053
IP6K2	ENSG00000068745	chr3:48728915-48730387	-0.48055
IQSEC2	ENSG00000124313	chrX:53308841-53310678	0.119072
CBX4	ENSG00000141582	chr17:77809194-77809445	-0.116409
ANKRD10	ENSG00000088448	chr13:111545610-111558380	-0.46613
FAM24B	ENSG00000213185	chr10:124615302-124639001	-0.269207
LIPE-AS1	ENSG00000213904	chr19:42901376-42912410	0.138676
DCAF8	ENSG00000132716	chr1:160213824-160231075	0.141858
FAM179B	ENSG00000198718	chr14:45515906-45516104	0.28545
SPG20	ENSG00000133104	chr13:36909969-36910424	0.242307
TUBB3	ENSG00000258947	chr16:89989866-89998979	-0.146882
RP4-583P15.10	ENSG00000229299	chr20:62377028-62377176	0.415076
JADE2	ENSG00000043143	chr5:133871605-133873679	-0.171386
SPIN1	ENSG00000106723	chr9:91003453-91041297	-0.197675
DLGAP1-AS1	ENSG00000177337	chr18:3596806-3596807	-0.10428
SLC25A36	ENSG00000114120	chr3:140682069-140689769	-0.316259
LINC01123	ENSG00000204588	chr2:110751396-110751978	0.336194
FBXO38	ENSG00000145868	chr5:147807510-147812987	0.104634
FAM189B	ENSG00000160767	chr1:155220612-155220886	-0.10664
NDEL1	ENSG00000166579	chr17:8339363-8347245	0.351957
ORMDL1	ENSG00000128699	chr2:190647739-190647740	-0.265742
SRRM2	ENSG00000167978	chr16:2802847-2806335	-0.221594
TBC1D10A	ENSG00000099992	chr22:30688840-30689640	-0.194952
GPX2	ENSG00000176153	chr14:65406916-65409223	-0.223651
TMEM256-PLSCR3	ENSG00000187838	chr17:7296271-7296463	-0.209916
KLC1	ENSG00000126214	chr14:104151373-104151975	0.219253
TPST1	ENSG00000169902	chr7:65821858-65824882	0.241259
PTAR1	ENSG00000188647	chr9:72338546-72347055	-0.133069
TRAPPC10	ENSG00000160218	chr21:45479095-45483419	-0.262111
SLC25A37	ENSG00000147454	chr8:23386725-23389198	0.36227
SPIN3	ENSG00000204271	chrX:57010911-57021156	-0.462091
RWDD3	ENSG00000122481	chr1:95710254-95712098	-0.290448
PROSER2	ENSG00000148426	chr10:11892207-11893996	0.1707
PPP3CB	ENSG00000107758	chr10:75198178-75199630	0.188228
SPECC1	ENSG00000128487	chr17:20059549-20130726	0.137436
EFNA3	ENSG00000143590	chr1:155057880-155058353	0.4952
GPATCH8	ENSG00000186566	chr17:42541912-42552197	-0.3068
RPL7L1	ENSG00000146223	chr6:42854844-42854845	-0.206544
CREB1	ENSG00000118260	chr2:208425884-208432187	0.204745
POLG2	ENSG00000256525	chr17:62489138-62492525	-0.251505
PDE8A	ENSG00000073417	chr15:85661070-85664028	-0.187662
MARK2	ENSG00000072518	chr11:63672515-63673560	0.185075
QTRTD1	ENSG00000151576	chr3:113775711-113784084	-0.265353
AP006621.5	ENSG00000255284	chr11:783671-784024	0.116828
AC007773.2	ENSG00000267213	chr19:32882092-32890657	-0.35206
NR2C1	ENSG00000120798	chr12:95451654-95452086	0.221864
MFHAS1	ENSG00000147324	chr8:8643565-8654875	-0.262366
AMBRA1	ENSG00000110497	chr11:46570050-46615378	-0.149773
BAIAP2L2	ENSG00000128298	chr22:38483271-38493039	0.347182
LRRFIP1	ENSG00000124831	chr2:238678635-238680724	-0.191164
MDK	ENSG00000110492	chr11:46402733-46402734	0.38439
PNPLA8	ENSG00000135241	chr7:108161965-108166473	0.275138
COL27A1	ENSG00000196739	chr9:116980490-116982071	0.16468
SNRPA	ENSG00000077312	chr19:41257113-41257114	-0.266761
TBRG4	ENSG00000136270	chr7:45143042-45143698	-0.156524
OXR1	ENSG00000164830	chr8:107726213-107751686	-0.111755
SNHG12	ENSG00000197989	chr1:28906099-28906195	0.200884
MEF2D	ENSG00000116604	chr1:156453222-156469224	0.123635
TRAPPC10	ENSG00000160218	chr21:45504144-45506683	-0.210959
PIGF	ENSG00000151665	chr2:46819064-46819614	0.238099
ZFPM2-AS1	ENSG00000251003	chr8:106939945-107072609	-0.239805
GPBP1	ENSG00000062194	chr5:56531859-56542127	-0.374146
CWF19L1	ENSG00000095485	chr10:102021820-102027328	-0.24809
IL4R	ENSG00000077238	chr16:27364017-27367129	-0.119701
PRKCQ-AS1	ENSG00000237943	chr10:6625990-6625991	-0.202958
ZSCAN32	ENSG00000140987	chr16:3433711-3434459	0.333177
MTRR	ENSG00000124275	chr5:7871036-7875371	-0.104886
UBAP2L	ENSG00000143569	chr1:154241888-154242676	-0.324456
GCN1L1	ENSG00000089154	chr12:120616753-120621372	-0.10343
SPIDR	ENSG00000164808	chr8:48641609-48641974	-0.229656
PCYT2	ENSG00000185813	chr17:79867478-79869143	-0.593049
KIAA0391	ENSG00000258790	chr14:35747924-35777200	-0.281783
ZC3H11A	ENSG00000058673	chr1:203765624-203770703	-0.146423
TTC33	ENSG00000113638	chr5:40747121-40755926	-0.220817
YTHDF1	ENSG00000149658	chr20:61828086-61845216	0.133091
ATMIN	ENSG00000166454	chr16:81069811-81074961	-0.280583
CREB1	ENSG00000118260	chr2:208440178-208442229	-0.178944
CHAC2	ENSG00000143942	chr2:53999079-54001279	-0.220831
PDDC1	ENSG00000177225	chr11:771104-771333	-0.217472
SETD8	ENSG00000183955	chr12:123868755-123873980	-0.405193
C12orf29	ENSG00000133641	chr12:88429515-88436602	0.135906
MYEOV	ENSG00000172927	chr11:69062043-69156278	0.251065
SREK1	ENSG00000153914	chr5:65449424-65451893	0.384662
PAXBP1	ENSG00000159086	chr21:34123529-34127524	-0.43847
TRAFD1	ENSG00000135148	chr12:112563422-112568315	-0.19807
PYGO2	ENSG00000163348	chr1:154933502-154935995	0.494906
STX2	ENSG00000111450	chr12:131286033-131291527	0.193224
RP11-347C12.1	ENSG00000198064	chr16:30246900-30251432	-0.216695
METTL13	ENSG00000010165	chr1:171750935-171751128	0.33354
UNKL	ENSG00000059145	chr16:1414256-1414257	-0.324681
INPP5B	ENSG00000204084	chr1:38341388-38345757	0.103714
NINL	ENSG00000101004	chr20:25490425-25491310	0.279407
CTD-2020K17.3	ENSG00000233175	chr17:43317971-43318478	-0.279237
MAPK12	ENSG00000188130	chr22:50696089-50696333	-0.232353
PALLD	ENSG00000129116	chr4:169753322-169812073	0.308116
PIGA	ENSG00000165195	chrX:15344168-15349338	-0.303851
ATP5E	ENSG00000124172	chr20:57601524-57603862	0.188718
TEAD2	ENSG00000074219	chr19:49858463-49860509	0.204309
FAM219B	ENSG00000178761	chr15:75192478-75192479	-0.214777
ACTN1	ENSG00000072110	chr14:69343957-69345175	0.446478
C2orf49	ENSG00000135974	chr2:105959557-105959558	-0.256872
GS1-259H13.10	ENSG00000272647	chr7:99158318-99159991	-0.476931
ARPP19	ENSG00000128989	chr15:52861099-52861313	-0.245236
ING3	ENSG00000071243	chr7:120595678-120606680	-0.229511
ASNS	ENSG00000070669	chr7:97501308-97501663	0.301109
PTBP2	ENSG00000117569	chr1:97270495-97271975	0.330172
NCOA7	ENSG00000111912	chr6:126221167-126236479	-0.500765
MPHOSPH9	ENSG00000051825	chr12:123707674-123714808	0.109791
WDR19	ENSG00000157796	chr4:39274681-39274794	0.291247
HERC4	ENSG00000148634	chr10:69716733-69726440	-0.172859
MORF4L2	ENSG00000123562	chrX:102939657-102940099	0.146088
MACF1	ENSG00000127603	chr1:39854330-39888046	0.258633
TTC3	ENSG00000182670	chr21:38529208-38532001	-0.168289
RPRD2	ENSG00000163125	chr1:150444218-150444219	-0.166471
GZF1	ENSG00000125812	chr20:23350378-23350728	-0.233841
CLIP1	ENSG00000130779	chr12:122803895-122812494	-0.133677
ARHGAP12	ENSG00000165322	chr10:32141525-32150323	-0.210077
SPACA6P	ENSG00000182310	chr19:52205905-52206274	-0.318284
TRAF2	ENSG00000127191	chr9:139780993-139793165	-0.261816
RANGRF	ENSG00000108961	chr17:8192906-8193131	-0.101928
ITGA2B	ENSG00000005961	chr17:42457182-42457614	0.427562
FLCN	ENSG00000154803	chr17:17119817-17120383	-0.105809
REPIN1	ENSG00000214022	chr7:150067973-150068317	0.138381
FAM192A	ENSG00000172775	chr16:57212764-57215466	0.268023
CLASP1	ENSG00000074054	chr2:122165291-122166600	0.181748
RHOQ	ENSG00000119729	chr2:46770951-46803226	0.176318
HEATR5B	ENSG00000008869	chr2:37306474-37310432	-0.235912
LMTK2	ENSG00000164715	chr7:97833018-97833256	-0.154846
CDRT1	ENSG00000241322	chr17:15496809-15498062	-0.131253
RP4-583P15.10	ENSG00000229299	chr20:62377028-62377176	0.398312
TCERG1	ENSG00000113649	chr5:145878249-145882938	-0.101769
STRN3	ENSG00000196792	chr14:31382863-31404369	-0.261015
MANBA	ENSG00000109323	chr4:103592168-103592438	0.185691
YJEFN3	ENSG00000250067	chr19:19638579-19640173	-0.59578
INPP5B	ENSG00000204084	chr1:38343995-38345757	-0.221017
SREBF1	ENSG00000072310	chr17:17715370-17716682	-0.342174
AKR1B15	ENSG00000227471	chr7:134250298-134252665	-0.235661
RBMX	ENSG00000147274	chrX:135954504-135955405	0.146069
MANBA	ENSG00000109323	chr4:103595227-103610731	-0.259787
REV3L	ENSG00000009413	chr6:111629448-111631056	0.26601
RHOBTB1	ENSG00000072422	chr10:62631083-62631084	-0.133392
SFPQ	ENSG00000116560	chr1:35643637-35646736	0.403282
UBR5	ENSG00000104517	chr8:103269945-103271213	-0.190438
NCOA7	ENSG00000111912	chr6:126234839-126236479	0.357432
MTCL1	ENSG00000168502	chr18:8813231-8818961	-0.148078
FAM189B	ENSG00000160767	chr1:155218264-155220067	-0.116569
RASA2	ENSG00000155903	chr3:141304940-141305488	-0.20189
OSTM1	ENSG00000081087	chr6:108363770-108363771	-0.24439
CHD3	ENSG00000170004	chr17:7812656-7813746	-0.117032
FLCN	ENSG00000154803	chr17:17118630-17120383	0.143056
PIKFYVE	ENSG00000115020	chr2:209169042-209176960	-0.329377
SULT1A4	ENSG00000213648	chr16:29469336-29472703	-0.267496
LINC01021	ENSG00000250337	chr5:27494442-27496056	0.278054
NUP50	ENSG00000093000	chr22:45564127-45566869	0.242102
DCAF7	ENSG00000136485	chr17:61666599-61666600	-0.206796
GCA	ENSG00000115271	chr2:163200785-163204088	-0.355121
PCID2	ENSG00000126226	chr13:113832487-113832488	-0.227638
PIEZO1	ENSG00000103335	chr16:88783619-88785982	-0.245318
SLC25A37	ENSG00000147454	chr8:23424112-23424113	-0.308928
GTPBP1	ENSG00000100226	chr22:39102152-39104850	-0.328691
TCERG1	ENSG00000113649	chr5:145859657-145862155	-0.255658
FNBP4	ENSG00000109920	chr11:47753771-47754089	0.319306
PLOD2	ENSG00000152952	chr3:145795711-145796903	0.158212
SIK3	ENSG00000160584	chr11:116715966-116716106	0.209061
ZBTB38	ENSG00000177311	chr3:141105779-141115101	-0.153306
MTFR2	ENSG00000146410	chr6:136560958-136562582	-0.109238
BRWD1	ENSG00000185658	chr21:40676536-40684767	0.136365
TMEM256-PLSCR3	ENSG00000187838	chr17:7296828-7297423	0.126748
TECR	ENSG00000099797	chr19:14675935-14676014	-0.298775
BBIP1	ENSG00000214413	chr10:112660284-112660784	0.310847
RP11-45M22.4	ENSG00000264187	chr17:17119817-17120383	-0.10543
ERMP1	ENSG00000099219	chr9:5801328-5810011	0.208941
KAT5	ENSG00000172977	chr11:65480529-65481064	0.111507
LINC01184	ENSG00000245937	chr5:127396936-127418662	0.217158
BET1L	ENSG00000177951	chr11:205469-205611	-0.17575
TTC3	ENSG00000182670	chr21:38468943-38480692	0.367425
SETD5	ENSG00000168137	chr3:9477590-9482140	-0.252978
PGAP3	ENSG00000161395	chr17:37830127-37830128	-0.131942
DDX17	ENSG00000100201	chr22:38884120-38888061	0.206895
PIGF	ENSG00000151665	chr2:46815318-46819614	-0.133978
GORAB	ENSG00000120370	chr1:170509806-170511632	0.227932
PEX1	ENSG00000127980	chr7:92132509-92135562	0.244591
LRRFIP2	ENSG00000093167	chr3:37107433-37116515	-0.137165
RP11-443P15.2	ENSG00000171658	chr3:185693145-185697447	-0.723653
RAB11FIP3	ENSG00000090565	chr16:539000-541134	0.178173
KDM6B	ENSG00000132510	chr17:7755114-7755269	-0.103657
MTHFD2L	ENSG00000163738	chr4:75025805-75027497	0.300669
TNRC6A	ENSG00000090905	chr16:24803138-24805865	-0.225686
FADS3	ENSG00000221968	chr11:61644337-61644338	-0.190032
FAM175A	ENSG00000163322	chr4:84403397-84406139	-0.109457
RP11-145E5.5	ENSG00000264545	chr9:21818201-22127102	-0.202419
KIAA1217	ENSG00000120549	chr10:24834032-24834756	0.463867
TRIM11	ENSG00000154370	chr1:228584866-228588665	-0.111087
STAG2	ENSG00000101972	chrX:123095706-123156381	-0.118123
TCERG1	ENSG00000113649	chr5:145879534-145882938	0.157497
BCL6	ENSG00000113916	chr3:187452695-187463198	-0.414646
PRPF39	ENSG00000185246	chr14:45578983-45579097	-0.330321
WNK1	ENSG00000060237	chr12:987527-989887	-0.285974
RBSN	ENSG00000131381	chr3:15116437-15117113	-0.174183
GABPB1	ENSG00000104064	chr15:50601995-50647182	-0.180002
TXLNGY	ENSG00000131002	chrY:21759551-21760438	0.143318
SNRNP35	ENSG00000184209	chr12:123942763-123950085	-0.297378
PDE8A	ENSG00000073417	chr15:85661070-85663705	0.185075
IQCB1	ENSG00000173226	chr3:121500721-121507131	0.142901
PRPF39	ENSG00000185246	chr14:45578983-45579297	0.285082
MLK4	ENSG00000143674	chr1:233508528-233511662	0.280171
RHBDD2	ENSG00000005486	chr7:75508578-75511147	0.183334
SETX	ENSG00000107290	chr9:135187243-135202340	0.196149
FBXO22	ENSG00000167196	chr15:76196444-76196832	-0.138901
KMT2E	ENSG00000005483	chr7:104654982-104681286	-0.189485
NADSYN1	ENSG00000172890	chr11:71171259-71171768	-0.111211
SPATA5L1	ENSG00000171763	chr15:45697703-45702570	-0.120031
LINC00894	ENSG00000235703	chrX:149114246-149115392	0.211397
C6orf141	ENSG00000197261	chr6:49519003-49519004	-0.262801
FUBP1	ENSG00000162613	chr1:78413137-78413138	-0.370982
ERI2	ENSG00000196678	chr16:20809533-20810585	0.406319
SUZ12P1	ENSG00000264538	chr17:29096983-29103315	0.285064
DGKE	ENSG00000153933	chr17:54925426-54926057	0.259677
ST3GAL5	ENSG00000115525	chr2:86075327-86088304	-0.100738
PGAP3	ENSG00000161395	chr17:37829903-37830246	0.189152
NEAT1	ENSG00000245532	chr11:65191097-65191098	-0.143589
AGER	ENSG00000204305	chr6:32149016-32149301	0.279557
ARL14EP	ENSG00000152219	chr11:30344749-30352433	-0.196473
TBC1D10B	ENSG00000169221	chr16:30370138-30370493	-0.113884
ADCY3	ENSG00000138031	chr2:25043320-25043593	0.324012
MRPL35	ENSG00000132313	chr2:86437736-86440751	0.218281
SMAD6	ENSG00000137834	chr15:67001076-67004006	0.298116
NMRK1	ENSG00000106733	chr9:77684958-77692075	-0.1033
MTCL1	ENSG00000168502	chr18:8807058-8809446	-0.31121
USP42	ENSG00000106346	chr7:6180615-6182563	-0.127537
SP110	ENSG00000135899	chr2:231041440-231042254	-0.291332
GTPBP1	ENSG00000100226	chr22:39104961-39111912	-0.117623
CSNK1E	ENSG00000213923	chr22:38687944-38689261	-0.389473
RPRD1B	ENSG00000101413	chr20:36694658-36718128	-0.209267
ENTHD2	ENSG00000167302	chr17:79206318-79207232	-0.241068
CFLAR	ENSG00000003402	chr2:201983624-201994452	-0.111352
GRB7	ENSG00000141738	chr17:37902041-37902362	0.280639
CDK5RAP2	ENSG00000136861	chr9:123165507-123165508	-0.176675
AHCTF1	ENSG00000153207	chr1:247027418-247030546	-0.105557
LRRFIP1	ENSG00000124831	chr2:238678635-238681509	0.251616
ERVK3-1	ENSG00000142396	chr19:58817582-58823387	0.242823
LMTK2	ENSG00000164715	chr7:97833498-97834776	-0.208612
BCL2L11	ENSG00000153094	chr2:111881446-111881627	0.367652
HSF2	ENSG00000025156	chr6:122744831-122752575	-0.325127
ENSG00000132142	ENSG00000132142	chr17:35685925-35687113	0.318411
IL11RA	ENSG00000137070	chr9:34655314-34655602	0.262477
UBR5	ENSG00000104517	chr8:103269945-103270544	0.22031
THAP9-AS1	ENSG00000251022	chr4:83816927-83819142	0.136474
TCF20	ENSG00000100207	chr22:42564742-42565853	0.32824
LHFPL2	ENSG00000145685	chr5:77806221-77860636	-0.292971
PIP5K1A	ENSG00000143398	chr1:151196755-151199796	-0.128399
ERRFI1	ENSG00000116285	chr1:8075752-8086218	-0.169164
GSTM4	ENSG00000168765	chr1:110201732-110207633	-0.263863
PCID2	ENSG00000126226	chr13:113832322-113832323	-0.237355
PNRC1	ENSG00000146278	chr6:89792454-89793472	0.29841
FBXO18	ENSG00000134452	chr10:5932309-5944983	-0.325105
SPIDR	ENSG00000164808	chr8:48641609-48641974	-0.208938
RAB15	ENSG00000139998	chr14:65417132-65417661	0.128414
CNTNAP3B	ENSG00000154529	chr9:43908523-43915826	0.437623
ERVK3-1	ENSG00000142396	chr19:58823427-58823428	-0.379152
SIK3	ENSG00000160584	chr11:116715966-116715967	-0.205629
ZIC5	ENSG00000139800	chr13:100622183-100622381	-0.363809
MANBA	ENSG00000109323	chr4:103586009-103590120	-0.131446
ANKRD10	ENSG00000088448	chr13:111546549-111558380	-0.338609
CYB561D2	ENSG00000114395	chr3:50388415-50388840	0.205849
CREB1	ENSG00000118260	chr2:208425096-208425843	0.145568
ZFP62	ENSG00000196670	chr5:180275082-180275083	-0.29341
LRRC28	ENSG00000168904	chr15:99816821-99827462	-0.262605
PTPN6	ENSG00000111679	chr12:7060518-7060519	0.184362
CXCL2	ENSG00000081041	chr4:74964401-74964516	0.188734
SNX4	ENSG00000114520	chr3:125188363-125195539	-0.240388
MANBA	ENSG00000109323	chr4:103647840-103681875	-0.329702
ING5	ENSG00000168395	chr2:242662686-242664404	-0.293734
AC006486.9	ENSG00000268643	chr19:42744294-42759130	0.280379
ETV5	ENSG00000244405	chr3:185798964-185823094	-0.137258
ABCD4	ENSG00000119688	chr14:74766378-74766853	0.187568
NUTM2A-AS1	ENSG00000223482	chr10:89005612-89005872	-0.240574
LDLR	ENSG00000130164	chr19:11211021-11213340	-0.163073
RAD1	ENSG00000113456	chr5:34913683-34914800	-0.269423
NDUFA13	ENSG00000186010	chr19:19639495-19640173	0.605857
ANKMY2	ENSG00000106524	chr7:16684437-16685132	0.107411
BCS1L	ENSG00000074582	chr2:219524466-219525662	-0.180448
RIMKLB	ENSG00000166532	chr12:8932708-8933171	0.303339
IDI1	ENSG00000067064	chr10:1090111-1094804	-0.256109
SIRT1	ENSG00000096717	chr10:69651312-69666547	-0.203987
CCDC14	ENSG00000175455	chr3:123665904-123666127	0.185762
HNRNPUL2-BSCL2	ENSG00000234857	chr11:62474796-62482972	-0.347713
ERGIC3	ENSG00000125991	chr20:34130690-34131410	0.279591
METTL13	ENSG00000010165	chr1:171750935-171751128	0.315382
ATL2	ENSG00000119787	chr2:38523255-38525286	-0.130456
SIRT7	ENSG00000187531	chr17:79875843-79875915	-0.610828
AC138969.4	ENSG00000183889	chr16:16411634-16412780	0.23264
GMPR2	ENSG00000100938	chr14:24702183-24702425	0.256185
MNX1	ENSG00000130675	chr7:156798567-156802354	0.278555
TRIM11	ENSG00000154370	chr1:228584866-228589767	0.114763
SCML1	ENSG00000047634	chrX:17755800-17764138	-0.242159
AVIL	ENSG00000135407	chr12:58201372-58201373	-0.409417
CWF19L1	ENSG00000095485	chr10:102010089-102013178	-0.273396
SVIL-AS1	ENSG00000224597	chr10:29704341-29709420	-0.115386
PALLD	ENSG00000129116	chr4:169799545-169812073	-0.157661
SAMD4B	ENSG00000179134	chr19:39839029-39844646	-0.350851
PHF2	ENSG00000197724	chr9:96421882-96422474	-0.140158
FKBP10	ENSG00000141756	chr17:39975986-39975987	-0.36864
DDX10	ENSG00000178105	chr11:108800435-108810973	-0.209474
DICER1	ENSG00000100697	chr14:95555345-95556850	0.42329
B4GALT3	ENSG00000158850	chr1:161145864-161146224	-0.227129
TMEM156	ENSG00000121895	chr4:39000529-39033846	-0.133291
RABL2A	ENSG00000144134	chr2:114398929-114398930	-0.101302
SBF2	ENSG00000133812	chr11:10024236-10049999	-0.269349

## Sheet: WSN_12HPI
GeneName	GeneID	Splice Junction Coords	dPSI
ACOX1	ENSG00000161533	chr17:73974774-73975046	-0.347346
NADK	ENSG00000008130	chr1:1696885-1709728	-0.610045
CDK5RAP2	ENSG00000136861	chr9:123165349-123166314	-0.375509
LUC7L3	ENSG00000108848	chr17:48828055-48828056	-0.302087
VARS2	ENSG00000137411	chr6:30885583-30886604	-0.311762
PBXIP1	ENSG00000163346	chr1:154926233-154928545	-0.371023
VEZF1	ENSG00000136451	chr17:56060754-56065440	-0.545103
FNIP1	ENSG00000217128	chr5:131042239-131044894	-0.540032
SUN1	ENSG00000164828	chr7:889240-889560	-0.479692
LRRC45	ENSG00000169683	chr17:79987061-79987419	-0.390617
MAP3K8	ENSG00000107968	chr10:30723307-30727845	-0.350829
MEF2D	ENSG00000116604	chr1:156449588-156450626	-0.466922
AKR1B15	ENSG00000227471	chr7:134234001-134249350	-0.745946
SIPA1L3	ENSG00000105738	chr19:38397998-38398184	0.475752
SYNJ2	ENSG00000078269	chr6:158438322-158449788	0.334257
C9orf152	ENSG00000188959	chr9:112963754-112969667	-0.307447
GABRE	ENSG00000102287	chrX:151124332-151125755	0.529507
CTNNB1	ENSG00000168036	chr3:41241161-41265512	-0.269348
SETD5	ENSG00000168137	chr3:9506356-9512143	-0.427928
RAP1B	ENSG00000127314	chr12:69004823-69042479	-0.343834
JADE2	ENSG00000043143	chr5:133909452-133912458	-0.261465
HLA-F	ENSG00000204642	chr6:29693340-29858041	-0.325336
PHF12	ENSG00000109118	chr17:27237387-27238130	-0.436722
NAB1	ENSG00000138386	chr2:191514086-191523884	-0.418251
CUL3	ENSG00000036257	chr2:225400358-225422376	-0.432385
LARP1B	ENSG00000138709	chr4:129028468-129029038	0.366288
FIP1L1	ENSG00000145216	chr4:54257306-54257597	0.370401
FAM49B	ENSG00000153310	chr8:130892704-130915558	-0.332237
TRIM26	ENSG00000234127	chr6:30166930-30168812	-0.32943
MAPK6	ENSG00000069956	chr15:52311573-52338027	-0.426224
AMMECR1L	ENSG00000144233	chr2:128624570-128627028	-0.366222
KLF6	ENSG00000067082	chr10:3824406-3827105	-0.512219
SNX1	ENSG00000028528	chr15:64429131-64429767	-0.30026
FXR1	ENSG00000114416	chr3:180693192-180693910	0.378914
PLCXD1	ENSG00000182378	chrX:200981-207315	0.367142
SYVN1	ENSG00000162298	chr11:64896186-64897723	0.337823
INTS4	ENSG00000149262	chr11:77698744-77702154	0.396291
NCOA7	ENSG00000111912	chr6:126211956-126236479	-0.34373
JMJD1C	ENSG00000171988	chr10:64979743-65024411	0.328853
YTHDF3	ENSG00000185728	chr8:64081970-64085212	0.595121
TSC22D4	ENSG00000166925	chr7:100064791-100065175	-0.341566
CDK16	ENSG00000102225	chrX:47078504-47082951	-0.306164
NUP50	ENSG00000093000	chr22:45567564-45571775	-0.296123
FGFR3	ENSG00000068078	chr4:1806247-1807082	0.409888
ALKBH1	ENSG00000100601	chr14:78146313-78161081	-0.239184
GRB10	ENSG00000106070	chr7:50742355-50763289	0.27919
UBR5	ENSG00000104517	chr8:103312379-103316271	-0.423477
YAE1D1	ENSG00000241127	chr7:39610226-39611876	-0.687179
SCD	ENSG00000099194	chr10:102114389-102116289	-0.563398
GSK3A	ENSG00000105723	chr19:42734543-42734544	-0.600852
PRKAG1	ENSG00000181929	chr12:49399635-49406845	-0.406418
WAC	ENSG00000095787	chr10:28879761-28897115	-0.295376
NRG1	ENSG00000157168	chr8:32474403-32585467	-0.277977
TNRC6A	ENSG00000090905	chr16:24803138-24804794	0.377069
ENSG00000269751	ENSG00000269751	chr19:48984006-48984007	-0.292707
CTD-2600O9.1	ENSG00000187185	chr16:57832544-57841515	0.279751
MBD1	ENSG00000141644	chr18:47799841-47799934	-0.248984
PDXDC1	ENSG00000179889	chr16:15128410-15129306	-0.365374
TBPL1	ENSG00000028839	chr6:134274563-134301220	-0.314538
ALPK2	ENSG00000198796	chr18:56149271-56165281	-0.299739
ACAD8	ENSG00000151498	chr11:134129639-134130938	-0.302788
MANBA	ENSG00000109323	chr4:103590206-103592438	-0.673123
KIF12	ENSG00000136883	chr9:116854922-116855509	0.206182
EPC1	ENSG00000120616	chr10:32562209-32573626	-0.530658
ZBTB38	ENSG00000177311	chr3:141105779-141122769	-0.43349
EXOC5	ENSG00000070367	chr14:57714430-57735340	-0.331071
CHD2	ENSG00000173575	chr15:93444529-93467551	-0.403456
SNRNP27	ENSG00000124380	chr2:70131557-70131644	0.372832
CCNT2	ENSG00000082258	chr2:135696632-135698621	0.564281
LURAP1L	ENSG00000153714	chr9:12776026-12821385	-0.718037
RP11-44N21.1	ENSG00000257556	chr14:105561779-105561877	0.305262
PM20D2	ENSG00000146281	chr6:89868179-89871502	-0.302992
PHF2	ENSG00000197724	chr9:96418303-96418771	-0.294197
SLC26A11	ENSG00000181045	chr17:78199715-78201617	-0.469799
E2F6	ENSG00000169016	chr2:11595600-11597305	0.384012
ST3GAL5	ENSG00000115525	chr2:86090608-86115947	-0.505143
ZNF668	ENSG00000167394	chr16:31073601-31075616	0.368329
B4GALT3	ENSG00000158850	chr1:161145885-161146224	0.222483
FOXN2	ENSG00000170802	chr2:48541953-48573340	-0.40979
DDA1	ENSG00000130311	chr19:17426804-17430355	-0.302478
CCDC106	ENSG00000173581	chr19:56159643-56160368	-0.426969
TANK	ENSG00000136560	chr2:162016997-162017796	0.33115
HEATR5B	ENSG00000008869	chr2:37234447-37235754	-0.542595
ZNF254	ENSG00000213096	chr19:24289445-24290018	0.621526
ARID1A	ENSG00000117713	chr1:27100389-27100820	-0.364707
RCAN1	ENSG00000159200	chr21:35896008-35898961	0.474996
TPM2	ENSG00000198467	chr9:35685136-35685266	-0.266986
NUP50	ENSG00000093000	chr22:45574781-45577167	-0.300119
MROH6	ENSG00000204839	chr8:144648687-144649956	0.270494
USP34	ENSG00000115464	chr2:61416204-61417406	-0.351798
ELOVL6	ENSG00000170522	chr4:111119130-111119403	0.417216
LINC-PINT	ENSG00000231721	chr7:130629206-130630479	0.445257
RBSN	ENSG00000131381	chr3:15124115-15126242	-0.723136
SNHG8	ENSG00000269893	chr4:119200032-119200033	-0.293304
RP11-231C14.4	ENSG00000169203	chr16:29498720-29502788	-0.378043
BTN2A1	ENSG00000112763	chr6:26458370-26458835	-0.312583
FOSL2	ENSG00000075426	chr2:28631733-28634797	-0.368922
MAP4K5	ENSG00000012983	chr14:50915550-50923234	-0.517795
SSH2	ENSG00000141298	chr17:28030080-28120912	-0.442819
ADAR	ENSG00000160710	chr1:154575102-154600331	-0.369344
SPIN2B	ENSG00000186787	chrX:57146534-57146838	0.381533
PCM1	ENSG00000078674	chr8:17838264-17842956	-0.391674
AGAP3	ENSG00000133612	chr7:150831655-150837066	0.461422
FNBP4	ENSG00000109920	chr11:47746330-47747289	0.39821
CWF19L1	ENSG00000095485	chr10:102006692-102010005	-0.482947
C22orf39	ENSG00000242259	chr22:19365589-19371143	-0.308126
DENR	ENSG00000139726	chr12:123238354-123246734	-0.545305
FIZ1	ENSG00000179943	chr19:56107100-56108938	0.381553
CDC5L	ENSG00000096401	chr6:44397647-44413392	-0.490203
ENSG00000243452	ENSG00000243452	chr1:148577824-148579606	-0.384666
MISP	ENSG00000099812	chr19:751171-756890	-0.401105
SMEK1	ENSG00000100796	chr14:91939714-91942194	-0.354954
RNF145	ENSG00000145860	chr5:158585434-158585435	-0.299917
SETD1A	ENSG00000099381	chr16:30977707-30978141	0.289246
LMBR1L	ENSG00000139636	chr12:49491522-49494171	0.325306
NF1	ENSG00000196712	chr17:29576137-29579956	-0.355496
MAP4K3	ENSG00000011566	chr2:39492447-39494330	-0.342776
MAP3K8	ENSG00000107968	chr10:30723677-30727845	-0.346797
HERC4	ENSG00000148634	chr10:69797926-69804161	-0.344796
DAZAP1	ENSG00000071626	chr19:1416702-1417499	0.495749
RIPK4	ENSG00000183421	chr21:43166022-43166773	-0.434921
BCL2L12	ENSG00000126453	chr19:50173745-50176955	-0.273236
UGCG	ENSG00000148154	chr9:114677026-114685129	-0.285573
AKR1B15	ENSG00000227471	chr7:134250298-134252665	0.56508
CDC5L	ENSG00000096401	chr6:44397647-44413392	-0.441154
NUDT22	ENSG00000149761	chr11:63994604-63995040	-0.316902
CAMSAP2	ENSG00000118200	chr1:200730226-200776504	-0.321935
SMC4	ENSG00000113810	chr3:160117537-160118610	-0.470245
BCCIP	ENSG00000107949	chr10:127522515-127524673	-0.320121
PHF12	ENSG00000109118	chr17:27237387-27238130	-0.465745
PPP6C	ENSG00000119414	chr9:127912200-127915812	-0.327639
GRB7	ENSG00000141738	chr17:37902041-37902166	-0.263788
BCL2L11	ENSG00000153094	chr2:111907724-111921710	-0.532836
TCFL5	ENSG00000101190	chr20:61473449-61485368	-0.462135
ACYP1	ENSG00000119640	chr14:75520362-75530173	-0.29363
FBXW11	ENSG00000072803	chr5:171337801-171341347	0.438455
TRIM26	ENSG00000234127	chr6:30168915-30172433	-0.416891
HSDL1	ENSG00000103160	chr16:84169210-84178685	-0.345222
IRF1	ENSG00000125347	chr5:131822065-131822249	-0.232996
NPIPB6	ENSG00000198156	chr16:28371193-28374024	-0.474508
HMGB1	ENSG00000189403	chr13:31035670-31035671	-0.477175
CPSF2	ENSG00000165934	chr14:92588472-92592466	-0.333751
C22orf39	ENSG00000242259	chr22:19343811-19344413	-0.350782
GLYR1	ENSG00000140632	chr16:4854522-4854523	-0.298711
STK38L	ENSG00000211455	chr12:27450091-27450643	0.625303
pk	ENSG00000091436	chr2:174094461-174096920	-0.522685
DTX2P1	ENSG00000186704	chr7:76633624-76634867	-0.689985
ARHGAP12	ENSG00000165322	chr10:32141525-32150323	-0.358859
SMARCA2	ENSG00000080503	chr9:2123937-2161686	-0.276938
SPRED2	ENSG00000198369	chr2:65571728-65571853	0.338816
SMO	ENSG00000128602	chr7:128848692-128849130	-0.335387
LINC00473	ENSG00000223414	chr6:166354254-166401017	-0.631472
EIF4E2	ENSG00000135930	chr2:233421240-233422594	-0.293192
RND3	ENSG00000115963	chr2:151343969-151344063	-0.430005
UVRAG	ENSG00000198382	chr11:75827059-75851755	-0.596457
RPL7L1	ENSG00000146223	chr6:42854897-42854898	-0.393236
SSFA2	ENSG00000138434	chr2:182774698-182778572	-0.59349
PLXNB2	ENSG00000196576	chr22:50721310-50721479	-0.289426
MADD	ENSG00000110514	chr11:47348358-47350209	-0.48402
NADK	ENSG00000008130	chr1:1684499-1685006	-0.502901
AKR1B15	ENSG00000227471	chr7:134252729-134252910	0.393816
TAB3	ENSG00000157625	chrX:30873679-30877604	-0.55082
AGPAT5	ENSG00000155189	chr8:6566408-6582391	-0.333839
YTHDC2	ENSG00000047188	chr5:112927875-112929179	0.375713
FAM214A	ENSG00000047346	chr15:52902580-52903327	-0.413389
APOBEC3F	ENSG00000128394	chr22:39439095-39440088	-0.240142
NPRL2	ENSG00000114388	chr3:50386925-50387096	-0.328853
BCS1L	ENSG00000074582	chr2:219524466-219525662	-0.355077
TTC32	ENSG00000183891	chr2:20097796-20101237	-0.38927
PARP6	ENSG00000137817	chr15:72559369-72559370	-0.317994
PYROXD2	ENSG00000119943	chr10:100147064-100148111	-0.265314
KIAA0907	ENSG00000132680	chr1:155886528-155887290	0.21937
HNRNPDL	ENSG00000152795	chr4:83346715-83346716	-0.261007
SLC35B3	ENSG00000124786	chr6:8417727-8418977	0.34662
ZNF580	ENSG00000213015	chr19:56152549-56153863	-0.367452
POLR3F	ENSG00000132664	chr20:18449705-18453486	-0.207892
MTCL1	ENSG00000168502	chr18:8813231-8818961	-0.293949
TAF1B	ENSG00000115750	chr2:10053378-10059170	-0.498428
SLC35B3	ENSG00000124786	chr6:8430390-8434618	-0.380948
UTP14A	ENSG00000156697	chrX:129054728-129055170	-0.365572
SLC35B3	ENSG00000124786	chr6:8430390-8434618	-0.242179
FRS2	ENSG00000166225	chr12:69924740-69925295	0.370705
ERBB2IP	ENSG00000112851	chr5:65368119-65370852	0.432432
EBP	ENSG00000147155	chrX:48380295-48382142	0.267897
D2HGDH	ENSG00000180902	chr2:242690803-242694046	0.360054
TMEM256-PLSCR3	ENSG00000187838	chr17:7297155-7297423	-0.340945
TVP23C	ENSG00000175106	chr17:15458678-15458979	0.38666
MROH6	ENSG00000204839	chr8:144649846-144649956	-0.276983
CYLD	ENSG00000083799	chr16:50776752-50783487	-0.407203
ING5	ENSG00000168395	chr2:242651486-242662354	-0.401327
SOCS6	ENSG00000170677	chr18:67956326-67991779	-0.346831
PTPRJ	ENSG00000149177	chr11:48152268-48153063	0.305764
SUPT5H	ENSG00000196235	chr19:39948380-39948934	-0.319925
STK11	ENSG00000118046	chr19:1219412-1220372	-0.301087
PAXBP1	ENSG00000159086	chr21:34127664-34127665	-0.535631
RP11-163E9.2	ENSG00000239969	chr7:102004858-102006421	-0.385997
DNAJB14	ENSG00000164031	chr4:100822629-100824883	0.327594
LINC01184	ENSG00000245937	chr5:127396936-127418662	0.312737
LUCAT1	ENSG00000248323	chr5:90608312-90608895	0.331945
FRMD8	ENSG00000126391	chr11:65154592-65156832	-0.34601
TMEM11	ENSG00000178307	chr17:21102153-21117404	-0.288546
MTCL1	ENSG00000168502	chr18:8786089-8796230	-0.547177
CNOT8	ENSG00000155508	chr5:154244945-154250221	-0.503159
RIF1	ENSG00000080345	chr2:152325065-152325155	-0.313097
ZNF821	ENSG00000102984	chr16:71913926-71917114	-0.550067
CCDC14	ENSG00000175455	chr3:123634565-123649949	-0.346049
COPS3	ENSG00000141030	chr17:17174322-17184446	0.403789
PRKCG	ENSG00000126583	chr19:54409711-54409961	-0.391217
GBF1	ENSG00000107862	chr10:104111708-104112215	-0.469884
PIDD1	ENSG00000177595	chr11:802396-802543	-0.366914
COL4A3BP	ENSG00000113163	chr5:74695212-74696030	0.624371
C17orf61-PLSCR3	ENSG00000262481	chr17:7296683-7296786	-0.206504
ZNF530	ENSG00000183647	chr19:58115774-58117054	-0.605509
B9D2	ENSG00000123810	chr19:41867108-41869337	0.593545
RSPRY1	ENSG00000159579	chr16:57220363-57238416	-0.364006
ZC3H11A	ENSG00000058673	chr1:203764903-203765579	0.267078
GPN2	ENSG00000142751	chr1:27210781-27212464	-0.383121
FAM133B	ENSG00000234545	chr7:92210917-92219582	-0.424905
PPP6C	ENSG00000119414	chr9:127933459-127951923	-0.278007
RND3	ENSG00000115963	chr2:151343969-151344063	-0.327987
SPDL1	ENSG00000040275	chr5:169015579-169018052	-0.338013
HEATR5B	ENSG00000008869	chr2:37234447-37235754	-0.415928
TMF1	ENSG00000144747	chr3:69097713-69101096	-0.343442
ATG4A	ENSG00000101844	chrX:107369417-107372011	-0.688706
PLXNB2	ENSG00000196576	chr22:50723094-50724229	-0.290496
ZCCHC8	ENSG00000033030	chr12:122962839-122964737	-0.307664
OAS1	ENSG00000089127	chr12:113355505-113356402	-0.457774
SETD5	ENSG00000168137	chr3:9495552-9506109	-0.484726
PUM1	ENSG00000134644	chr1:31426828-31437521	-0.296978
USP47	ENSG00000170242	chr11:11927095-11941703	-0.53634
TRAPPC10	ENSG00000160218	chr21:45503183-45504003	-0.519833
YY1AP1	ENSG00000163374	chr1:155640255-155642351	-0.301482
WAC	ENSG00000095787	chr10:28879761-28897115	-0.311057
TRAFD1	ENSG00000135148	chr12:112563953-112568315	0.378913
CHD2	ENSG00000173575	chr15:93518180-93521464	-0.379841
RBM39	ENSG00000131051	chr20:34317449-34319863	-0.289232
RBSN	ENSG00000131381	chr3:15132046-15137480	-0.353208
DYNC2LI1	ENSG00000138036	chr2:44001285-44003921	-0.234597
NEK6	ENSG00000119408	chr9:127055292-127064215	0.368751
CCDC14	ENSG00000175455	chr3:123667979-123668231	0.453563
RILPL1	ENSG00000188026	chr12:124008192-124017721	-0.459709
MIR22HG	ENSG00000186594	chr17:1615693-1615694	-0.211806
HSF4	ENSG00000102878	chr16:67201125-67201206	-0.261339
UBAP2L	ENSG00000143569	chr1:154234173-154238977	-0.436373
USP34	ENSG00000115464	chr2:61420115-61430275	-0.220683
BTN2A2	ENSG00000124508	chr6:26383527-26384020	0.411985
NBPF1	ENSG00000219481	chr1:16935274-16939833	-0.352076
APPBP2	ENSG00000062725	chr17:58543820-58556509	-0.290973
MIB2	ENSG00000197530	chr1:1552454-1552455	-0.550192
ST7L	ENSG00000007341	chr1:113150219-113153463	0.238254
BRD1	ENSG00000100425	chr22:50181142-50181225	0.439584
ENSG00000108753	ENSG00000108753	chr17:36061182-36064924	-0.386559
SEMA4B	ENSG00000185033	chr15:90764997-90766791	-0.362496
RBSN	ENSG00000131381	chr3:15116437-15117113	-0.347361
SRSF9	ENSG00000111786	chr12:120901925-120902536	0.500576
CLK1	ENSG00000013441	chr2:201724938-201725961	0.473046
ZCCHC8	ENSG00000033030	chr12:122975114-122977262	-0.328955
ATF7	ENSG00000170653	chr12:53910432-53910433	-0.332393
ASXL1	ENSG00000171456	chr20:31017234-31017704	-0.225353
CASP3	ENSG00000164305	chr4:185559622-185560749	0.431781
VTA1	ENSG00000009844	chr6:142491558-142510563	-0.347874
APITD1-CORT	ENSG00000251503	chr1:10490625-10511434	0.463488
PRPF4B	ENSG00000112739	chr6:4061381-4061889	-0.496273
ENSG00000203827	ENSG00000203827	chr1:148743955-148744420	-0.421491
NUTM2B	ENSG00000188199	chr10:81468583-81470138	0.390774
CCHCR1	ENSG00000204536	chr6:31112565-31112662	-0.341139
HSPA12A	ENSG00000165868	chr10:118460640-118464662	-0.230955
OGFOD3	ENSG00000181396	chr17:80352419-80356072	-0.276311
RPRD1B	ENSG00000101413	chr20:36662500-36668837	-0.711624
PAPD4	ENSG00000164329	chr5:78941015-78944440	-0.337004
RASSF1	ENSG00000068028	chr3:50369585-50374604	-0.474358
HECTD1	ENSG00000092148	chr14:31642632-31644117	0.495246
PIF1	ENSG00000140451	chr15:65111422-65112046	-0.431385
WSB1	ENSG00000109046	chr17:25634769-25634770	-0.336807
HNRNPA2B1	ENSG00000122566	chr7:26230356-26230357	-0.223803
DHX16	ENSG00000204560	chr6:30633510-30638187	-0.329576
C1orf86	ENSG00000162585	chr1:2121220-2124284	0.24228
FNDC3B	ENSG00000075420	chr3:171851336-171944661	-0.430686
AP006621.5	ENSG00000255284	chr11:783889-783890	-0.306461
ENSG00000138041	ENSG00000138041	chr2:55816092-55825552	-0.356986
TECR	ENSG00000099797	chr19:14675670-14675878	0.418299
AKR1C2	ENSG00000151632	chr10:5042102-5042103	-0.313625
C11orf24	ENSG00000171067	chr11:68029270-68029271	-0.504809
CPEB2	ENSG00000137449	chr4:15034835-15054038	-0.303676
CHSY1	ENSG00000131873	chr15:101719185-101775287	-0.441332
JMJD1C	ENSG00000171988	chr10:64977091-64979638	0.369111
NT5M	ENSG00000205309	chr17:17207131-17209857	-0.360361
POLR2B	ENSG00000047315	chr4:57876366-57876367	-0.750708
MRPS18B	ENSG00000204568	chr6:30587766-30590609	-0.343405
GBF1	ENSG00000107862	chr10:104111708-104113357	0.475243
SCAF11	ENSG00000139218	chr12:46345510-46355483	-0.3039
TRA2A	ENSG00000164548	chr7:23561459-23571408	-0.325555
POMT2	ENSG00000009830	chr14:77745212-77745880	-0.378702
GLIS2	ENSG00000126603	chr16:4382453-4383348	-0.344528
HERC2	ENSG00000128731	chr15:28424176-28424288	-0.529968
LURAP1L	ENSG00000153714	chr9:12776026-12821385	-0.512517
ASB1	ENSG00000065802	chr2:239342336-239344352	-0.34658
USP42	ENSG00000106346	chr7:6190137-6193387	-0.318079
STAG2	ENSG00000101972	chrX:123224614-123224704	0.394121
RBM10	ENSG00000182872	chrX:47028897-47030427	-0.439918
NAB2	ENSG00000166886	chr12:57486978-57487190	-0.397257
UBTF	ENSG00000108312	chr17:42295664-42296813	-0.30069
XRCC1	ENSG00000073050	chr19:44065172-44079062	-0.30839
PIDD1	ENSG00000177595	chr11:802090-802543	0.453079
NUP50	ENSG00000093000	chr22:45561997-45564049	0.424004
LDLR	ENSG00000130164	chr19:11234020-11238684	-0.512701
BRD8	ENSG00000112983	chr5:137492956-137495244	-0.384198
REV1	ENSG00000135945	chr2:100052403-100055063	-0.40992
IL4R	ENSG00000077238	chr16:27351594-27353442	-0.526661
CEP41	ENSG00000106477	chr7:130061848-130067796	0.353045
CRNDE	ENSG00000245694	chr16:54957562-54959013	-0.278225
DNAJB6	ENSG00000105993	chr7:157178305-157202489	-0.428064
HGS	ENSG00000185359	chr17:79651133-79652635	-0.348008
EIF5	ENSG00000100664	chr14:103800597-103800726	-0.368596
ENSG00000140181	ENSG00000140181	chr15:23318711-23326007	0.431316
JAG2	ENSG00000184916	chr14:105612310-105612722	-0.455023
TMEM50B	ENSG00000142188	chr21:34821186-34821541	0.463582
AOC3	ENSG00000131471	chr17:41006750-41007461	-0.311456
CIC	ENSG00000079432	chr19:42796359-42796452	-0.364355
GNAI1	ENSG00000127955	chr7:79764594-79818267	-0.335016
NCOR2	ENSG00000196498	chr12:124870433-124882665	-0.303621
USP34	ENSG00000115464	chr2:61416204-61417406	-0.436476
MSH5	ENSG00000204410	chr6:31712358-31715164	-0.261183
CPT2	ENSG00000157184	chr1:53676991-53678453	0.386803
POMT1	ENSG00000130714	chr9:134382901-134384298	-0.349123
LINC01578	ENSG00000272888	chr15:93426416-93426815	0.425369
AGAP3	ENSG00000133612	chr7:150837963-150838985	0.524783
SFPQ	ENSG00000116560	chr1:35643637-35644266	0.307635
NR2F1-AS1	ENSG00000237187	chr5:92747215-92889467	-0.447219
HIRA	ENSG00000100084	chr22:19365589-19371143	-0.30807
ETF1	ENSG00000120705	chr5:137854556-137878522	-0.274514
STRN3	ENSG00000196792	chr14:31382863-31388172	0.571811
USP42	ENSG00000106346	chr7:6155154-6155283	0.461561
NADK	ENSG00000008130	chr1:1685647-1685723	-0.505465
FANCD2	ENSG00000144554	chr3:10085548-10088264	-0.371979
FBXW11	ENSG00000072803	chr5:171337801-171433462	-0.38549
MTFR2	ENSG00000146410	chr6:136570291-136571114	-0.545986
GIT1	ENSG00000108262	chr17:27910634-27916345	-0.400378
CANT1	ENSG00000171302	chr17:76994045-77005746	-0.318499
NASP	ENSG00000132780	chr1:46072263-46078841	-0.311669
FAM160A2	ENSG00000051009	chr11:6235803-6238601	0.359015
NOL8	ENSG00000198000	chr9:95081638-95083950	-0.37313
SETD5	ENSG00000168137	chr3:9495552-9495689	0.571922
CSNK1G3	ENSG00000151292	chr5:122927108-122930733	0.353685
SUN1	ENSG00000164828	chr7:889670-891021	-0.40305
PPIL3	ENSG00000240344	chr2:201752408-201753679	-0.359282
GRAMD1A	ENSG00000089351	chr19:35491390-35500023	-0.361065
MTMR14	ENSG00000163719	chr3:9731827-9739395	-0.3586
ARGLU1	ENSG00000134884	chr13:107209852-107209853	-0.539116
CTDSPL2	ENSG00000137770	chr15:44792011-44806796	-0.345127
KCTD9	ENSG00000104756	chr8:25303766-25315715	-0.376023
AGAP3	ENSG00000133612	chr7:150831655-150837066	0.292296
WHSC1L1	ENSG00000147548	chr8:38157108-38162105	-0.384724
PYGO2	ENSG00000163348	chr1:154935070-154935995	-0.312975
CDK11A	ENSG00000008128	chr1:1639023-1639619	-0.414611
ZNF302	ENSG00000089335	chr19:35169008-35169642	0.469912
RASSF3	ENSG00000153179	chr12:65004523-65078567	-0.489854
FLRT3	ENSG00000125848	chr20:14309973-14318050	0.423238
SVIL	ENSG00000197321	chr10:29760172-29762767	-0.390589
ACAD8	ENSG00000151498	chr11:134129639-134130938	-0.350311
CCNT2	ENSG00000082258	chr2:135700244-135703671	-0.675171
TRIP12	ENSG00000153827	chr2:230724290-230744698	-0.353093
MBD1	ENSG00000141644	chr18:47796188-47797839	-0.431546
USP3	ENSG00000140455	chr15:63829355-63845914	-0.296703
QTRTD1	ENSG00000151576	chr3:113775711-113775846	0.374884
FXR2	ENSG00000129245	chr17:7495243-7495572	-0.46323
PEX1	ENSG00000127980	chr7:92134216-92135562	-0.307582
RP11-552F3.12	ENSG00000267426	chr17:73908388-73909783	-0.321291
ANKRD13A	ENSG00000076513	chr12:110457133-110461851	-0.428096
ZNF302	ENSG00000089335	chr19:35169718-35173682	-0.400301
DNAJB14	ENSG00000164031	chr4:100822309-100824883	-0.326232
MEX3D	ENSG00000181588	chr19:1556922-1567463	-0.304584
ZNF777	ENSG00000196453	chr7:149153128-149163634	0.352948
NPIPP1	ENSG00000188599	chr16:15212911-15219548	-0.33054
UBE2D3	ENSG00000109332	chr4:103723795-103730829	-0.380751
UFL1	ENSG00000014123	chr6:96969826-96970739	0.528536
WDR20	ENSG00000140153	chr14:102687995-102689167	0.727236
SGSM2	ENSG00000141258	chr17:2266282-2266283	-0.339931
SEC22C	ENSG00000093183	chr3:42594940-42597422	0.20245
HNRNPA1	ENSG00000135486	chr12:54675578-54675579	-0.35202
AMBRA1	ENSG00000110497	chr11:46439602-46455024	-0.384154
MTCL1	ENSG00000168502	chr18:8786089-8796230	-0.667609
BIRC6	ENSG00000115760	chr2:32824967-32828073	-0.37153
FIZ1	ENSG00000179943	chr19:56105012-56108938	-0.31918
SUPT20H	ENSG00000102710	chr13:37596454-37598172	0.216717
G2E3	ENSG00000092140	chr14:31028478-31050282	-0.321534
APPL2	ENSG00000136044	chr12:105623001-105629737	-0.367124
LZTS2	ENSG00000107816	chr10:102762703-102763264	-0.411814
ENSG00000155984	ENSG00000155984	chrX:148682143-148685653	-0.347907
C1orf52	ENSG00000162642	chr1:85724405-85725041	0.314227
PLXNB2	ENSG00000196576	chr22:50725693-50726096	-0.460665
FTCDNL1	ENSG00000226124	chr2:200684480-200710798	-0.387015
TMEM107	ENSG00000179029	chr17:8077590-8079518	-0.225566
PLCXD2	ENSG00000240891	chr3:111451550-111564668	-0.427062
MIS18BP1	ENSG00000129534	chr14:45675373-45679583	-0.36157
ZNF765	ENSG00000196417	chr19:53905444-53957904	0.476721
LDLR	ENSG00000130164	chr19:11231198-11233850	-0.298006
PWWP2B	ENSG00000171813	chr10:134219793-134230565	-0.390548
TBC1D8	ENSG00000204634	chr2:101644894-101645953	-0.31811
SACM1L	ENSG00000211456	chr3:45773643-45776727	-0.434539
RP11-112J3.16	ENSG00000227388	chr9:35786320-35786644	0.605486
NOP14	ENSG00000087269	chr4:2944078-2945800	-0.311408
FUBP3	ENSG00000107164	chr9:133455151-133470870	-0.317899
AGAP3	ENSG00000133612	chr7:150784159-150813880	-0.292043
PDZD8	ENSG00000165650	chr10:119044982-119049697	-0.310104
FBXO38	ENSG00000145868	chr5:147805264-147812987	-0.320798
SNHG1	ENSG00000255717	chr11:62622410-62622605	-0.346231
NEDD4L	ENSG00000049759	chr18:56001124-56002710	-0.395984
CELF1	ENSG00000149187	chr11:47510576-47521005	-0.548919
GABPB1	ENSG00000104064	chr15:50593099-50593454	-0.443152
CD44	ENSG00000026508	chr11:35211612-35232793	-0.438502
RRN3P1	ENSG00000248124	chr16:21823736-21823843	-0.366141
ATF2	ENSG00000115966	chr2:175945493-175957789	-0.424299
UBE2C	ENSG00000175063	chr20:44441929-44442076	0.469954
IP6K2	ENSG00000068745	chr3:48731673-48732127	-0.65491
ZSCAN32	ENSG00000140987	chr16:3433711-3434459	0.416527
ELK3	ENSG00000111145	chr12:96588483-96617343	-0.293105
ANKRD28	ENSG00000206560	chr3:15709812-15711617	0.533308
WAC	ENSG00000095787	chr10:28899750-28900703	-0.5849
PGAM5	ENSG00000247077	chr12:133294384-133294573	-0.30277
IFNAR2	ENSG00000159110	chr21:34633032-34634866	0.352161
PLAU	ENSG00000122861	chr10:75671370-75671799	-0.386755
E2F6	ENSG00000169016	chr2:11597359-11605898	-0.321006
PAPD4	ENSG00000164329	chr5:78908898-78915435	-0.277337
KMT2D	ENSG00000167548	chr12:49416658-49418361	-0.349028
BIRC2	ENSG00000110330	chr11:102219744-102219745	-0.347531
ZC3H11A	ENSG00000058673	chr1:203771389-203771390	-0.637392
IL4R	ENSG00000077238	chr16:27351594-27353442	-0.485008
ZDHHC17	ENSG00000186908	chr12:77209799-77216186	-0.496184
CELF1	ENSG00000149187	chr11:47510576-47517495	0.294909
HAPLN3	ENSG00000140511	chr15:89422500-89424588	0.559509
PTPN3	ENSG00000070159	chr9:112216854-112219572	0.421527
HR	ENSG00000168453	chr8:21973941-21976463	0.328766
USP34	ENSG00000115464	chr2:61417012-61417013	-0.344636
TMEM198B	ENSG00000182796	chr12:56227230-56227231	-0.399736
BAAT	ENSG00000136881	chr9:104133745-104145752	-0.708555
MAP4K5	ENSG00000012983	chr14:50919974-50923234	0.420063
PPP3R1	ENSG00000221823	chr2:68415822-68444224	-0.265112
KMT2E	ENSG00000005483	chr7:104654982-104681286	-0.503885
SNX5	ENSG00000089006	chr20:17937681-17941783	0.34311
SRSF10	ENSG00000188529	chr1:24297929-24298063	-0.429437
PHF2	ENSG00000197724	chr9:96420518-96421793	-0.528205
SPACA6P	ENSG00000182310	chr19:52205905-52206070	0.281835
CLINT1	ENSG00000113282	chr5:157216521-157218711	-0.391632
UBTF	ENSG00000108312	chr17:42287841-42288407	0.321501
SESN2	ENSG00000130766	chr1:28599304-28599869	-0.246539
NUP210	ENSG00000132182	chr3:13455612-13461560	0.35933
AMMECR1L	ENSG00000144233	chr2:128622779-128624474	-0.280139
CTC-459F4.3	ENSG00000267575	chr19:28289084-28296513	0.41039
PLEKHA1	ENSG00000107679	chr10:124134322-124151819	-0.367131
ZNF775	ENSG00000196456	chr7:150066030-150068320	-0.451254
ANKRD10	ENSG00000088448	chr13:111545610-111558380	-0.572441
EPHA2	ENSG00000142627	chr1:16477458-16482343	-0.343489
CAMSAP2	ENSG00000118200	chr1:200813997-200814404	0.540863
SRSF5	ENSG00000100650	chr14:70235968-70237184	-0.289649
SEC16A	ENSG00000148396	chr9:139340171-139341307	-0.420974
RIC8B	ENSG00000111785	chr12:107254190-107279682	-0.380536
PREP	ENSG00000085377	chr6:105736769-105771540	-0.402644
C9orf3	ENSG00000148120	chr9:97767347-97767440	0.296194
JAG1	ENSG00000101384	chr20:10644662-10653349	-0.516661
EEF1D	ENSG00000104529	chr8:144672251-144674817	0.222096
DICER1	ENSG00000100697	chr14:95555345-95556850	0.454475
SNRNP27	ENSG00000124380	chr2:70131557-70131558	-0.297583
ERI1	ENSG00000104626	chr8:8860681-8865480	-0.398583
PNRC1	ENSG00000146278	chr6:89791153-89793472	-0.365014
MYO10	ENSG00000145555	chr5:16711354-16754937	-0.290129
TYW3	ENSG00000162623	chr1:75231967-75231968	-0.313721
STRN4	ENSG00000090372	chr19:47226541-47228064	-0.493098
AP1G1	ENSG00000166747	chr16:71823385-71842666	-0.364524
ENC1	ENSG00000171617	chr5:73932323-73936132	-0.321763
ORC3	ENSG00000135336	chr6:88304125-88311502	-0.42061
ZC3H11A	ENSG00000058673	chr1:203771779-203771780	-0.285754
PPP3R1	ENSG00000221823	chr2:68444263-68479257	-0.502968
ZNF821	ENSG00000102984	chr16:71895845-71898041	-0.425259
VHL	ENSG00000134086	chr3:10183871-10188198	-0.222635
GABPB1	ENSG00000104064	chr15:50593099-50593454	-0.428324
FAM107B	ENSG00000065809	chr10:14572514-14646239	-0.291281
FARSB	ENSG00000116120	chr2:223507724-223513459	-0.51803
TIAL1	ENSG00000151923	chr10:121347760-121355946	-0.306939
PCNT	ENSG00000160299	chr21:47863861-47864607	-0.318878
SLC25A26	ENSG00000144741	chr3:66271553-66286968	-0.251074
ZNF248	ENSG00000198105	chr10:38118616-38118617	-0.330854
RBM39	ENSG00000131051	chr20:34326939-34328447	-0.460158
CENPV	ENSG00000166582	chr17:16252337-16252338	-0.305984
SLU7	ENSG00000164609	chr5:159842317-159846030	-0.41043
ECHDC2	ENSG00000121310	chr1:53377693-53379567	0.270989
RICTOR	ENSG00000164327	chr5:38966177-38966743	0.486013
UNKL	ENSG00000059145	chr16:1414999-1415000	-0.335903
ITGB4	ENSG00000132470	chr17:73751931-73752510	-0.593317
BSCL2	ENSG00000168000	chr11:62474796-62476619	-0.54834
BAZ1B	ENSG00000009954	chr7:72856023-72856024	-0.521425
VEZF1	ENSG00000136451	chr17:56060754-56065440	-0.665626
MTSS1L	ENSG00000132613	chr16:70699443-70708209	-0.56791
PREPL	ENSG00000138078	chr2:44587177-44588519	0.373454
MSL1	ENSG00000188895	chr17:38285880-38287790	-0.344173
USP34	ENSG00000115464	chr2:61450299-61450383	-0.280144
NAPRT	ENSG00000147813	chr8:144660113-144661949	0.304233
SCN1B	ENSG00000105711	chr19:35521764-35523432	-0.305784
COX11	ENSG00000166260	chr17:53029473-53031022	0.261163
XPC	ENSG00000154767	chr3:14189501-14190314	0.360403
YWHAH	ENSG00000128245	chr22:32340806-32352126	-0.379126
SRSF5	ENSG00000100650	chr14:70235968-70236228	0.253496
MGAT5B	ENSG00000167889	chr17:74922812-74928727	0.303471
ACYP1	ENSG00000119640	chr14:75520362-75530173	-0.266727
SETX	ENSG00000107290	chr9:135187243-135201711	-0.564653
ANKRD49	ENSG00000168876	chr11:94231130-94231237	-0.44109
SPRY2	ENSG00000136158	chr13:80911891-80914757	-0.317977
RFT1	ENSG00000163933	chr3:53164018-53164354	0.312
FCHO2	ENSG00000157107	chr5:72333042-72337118	-0.306824
TAB3	ENSG00000157625	chrX:30849692-30861083	0.459644
ZFP62	ENSG00000196670	chr5:180275082-180278381	-0.401939
QRICH1	ENSG00000198218	chr3:49114471-49131345	-0.314489
NAB1	ENSG00000138386	chr2:191520879-191523884	0.506342
WTAP	ENSG00000146457	chr6:160169401-160174492	-0.411011
TAF2	ENSG00000064313	chr8:120756633-120757121	0.330455
SLC25A14	ENSG00000102078	chrX:129473950-129479156	-0.428207
GPCPD1	ENSG00000125772	chr20:5585086-5591488	-0.384223
PAN2	ENSG00000135473	chr12:56722425-56726597	-0.547264
DUSP16	ENSG00000111266	chr12:12674397-12715051	-0.383799
ESCO1	ENSG00000141446	chr18:19119970-19140820	-0.458276
ENSG00000184886	ENSG00000184886	chr17:34890881-34892943	0.540791
HEATR3	ENSG00000155393	chr16:50100893-50102691	0.666469
RBM10	ENSG00000182872	chrX:47028897-47032527	0.362915
R3HDM2	ENSG00000179912	chr12:57704246-57789532	-0.387446
C1QTNF6	ENSG00000133466	chr22:37578129-37578130	-0.31151
LDLR	ENSG00000130164	chr19:11238761-11240189	-0.523798
SIRT6	ENSG00000077463	chr19:4177135-4179101	-0.422666
ERF	ENSG00000105722	chr19:42754094-42754483	-0.266214
RELB	ENSG00000104856	chr19:45536007-45537502	-0.302482
DNAJB14	ENSG00000164031	chr4:100844342-100851607	-0.551281
BAIAP2L2	ENSG00000128298	chr22:38494186-38494418	-0.324619
USP36	ENSG00000055483	chr17:76800060-76802238	-0.359815
ADAMTS10	ENSG00000142303	chr19:8670694-8673016	-0.351114
MTSS1L	ENSG00000132613	chr16:70699443-70708209	-0.360483
SPTBN1	ENSG00000115306	chr2:54753703-54826229	-0.296906
SRSF4	ENSG00000116350	chr1:29487029-29508158	-0.319873
PPP2R5C	ENSG00000078304	chr14:102276373-102323023	-0.312373
PCMTD1	ENSG00000168300	chr8:52746249-52758221	-0.258226
NEDD4	ENSG00000069869	chr15:56122784-56125206	-0.266564
SLC35B1	ENSG00000121073	chr17:47784806-47785438	-0.354815
UHRF2	ENSG00000147854	chr9:6460791-6475391	-0.469738
E2F6	ENSG00000169016	chr2:11593924-11595468	0.505254
PF4	ENSG00000163737	chr4:74847260-74853009	0.913248
SLC12A6	ENSG00000140199	chr15:34553221-34567546	-0.336245
GOLPH3L	ENSG00000143457	chr1:150667326-150668206	0.297169
RBM10	ENSG00000182872	chrX:47038562-47038718	-0.30005
DPP8	ENSG00000074603	chr15:65790370-65792944	-0.367412
WDR19	ENSG00000157796	chr4:39274681-39274794	0.387256
GOLGA8B	ENSG00000215252	chr15:34825685-34826255	-0.555673
DMXL2	ENSG00000104093	chr15:51751857-51752487	0.534574
TMEM11	ENSG00000178307	chr17:21102153-21117404	-0.310028
FAM161A	ENSG00000170264	chr2:62063244-62065080	0.396048
WDR35	ENSG00000118965	chr2:20175424-20178512	-0.535137
SIN3B	ENSG00000127511	chr19:16965072-16973163	-0.33985
UBAP2L	ENSG00000143569	chr1:154214041-154214176	0.390275
NDUFV2	ENSG00000178127	chr18:9117901-9119472	0.438075
GLIS2	ENSG00000126603	chr16:4383520-4384802	-0.336664
WARS	ENSG00000140105	chr14:100835595-100842597	-0.638254
PIP5K1A	ENSG00000143398	chr1:151171557-151196724	-0.322675
RP11-159D12.2	ENSG00000264112	chr17:56066908-56066909	-0.224149
CNOT2	ENSG00000111596	chr12:70672054-70704675	-0.457363
PUM1	ENSG00000134644	chr1:31454252-31465237	-0.458687
CDK5R1	ENSG00000176749	chr17:30815104-30815265	0.561721
PPP1R7	ENSG00000115685	chr2:242105856-242109196	-0.298369
RP11-421L21.3	ENSG00000233184	chr1:101549130-101550608	0.377585
TBX3	ENSG00000135111	chr12:115117456-115118684	-0.471595
MSL1	ENSG00000188895	chr17:38285880-38287790	-0.280042
PPIG	ENSG00000138398	chr2:170487497-170488276	-0.352569
BMPR1B	ENSG00000138696	chr4:95917285-96025559	-0.33717
TPM1	ENSG00000140416	chr15:63353472-63353912	-0.403628
TRIP6	ENSG00000087077	chr7:100470366-100470794	-0.330437
FLRT3	ENSG00000125848	chr20:14308204-14318050	-0.335461
UPF2	ENSG00000151461	chr10:11963306-11971864	-0.479515
THUMPD3-AS1	ENSG00000206573	chr3:9431598-9431599	-0.340786
MTMR11	ENSG00000014914	chr1:149908122-149908475	-0.447774
LUC7L3	ENSG00000108848	chr17:48828213-48828658	-0.388605
NCL	ENSG00000115053	chr2:232321835-232321997	0.54142
POMT2	ENSG00000009830	chr14:77745212-77746166	-0.330029
PPP1R10	ENSG00000204569	chr6:30577732-30584255	-0.36511
BRD8	ENSG00000112983	chr5:137492956-137493331	0.379454
QRICH1	ENSG00000198218	chr3:49114471-49131345	-0.340124
DTX2P1-UPK3BP1-PMS2P11	ENSG00000265479	chr7:76633624-76634867	-0.687633
REPIN1	ENSG00000214022	chr7:150066957-150067849	0.349314
SEC16A	ENSG00000148396	chr9:139350618-139353586	0.329752
LRRFIP2	ENSG00000093167	chr3:37216096-37217551	-0.331681
PPP1R35	ENSG00000160813	chr7:100033156-100033471	0.353122
TRA2A	ENSG00000164548	chr7:23562051-23571408	-0.278199
CDC37L1	ENSG00000106993	chr9:4688606-4697096	-0.334453
HERC2	ENSG00000128731	chr15:28422655-28424288	0.301985
FNBP4	ENSG00000109920	chr11:47753113-47754089	-0.402731
RP11-45M22.4	ENSG00000264187	chr17:17118630-17120383	0.677289
CPSF7	ENSG00000149532	chr11:61183991-61187421	-0.305981
EFR3A	ENSG00000132294	chr8:132916569-132952746	-0.574908
TCEA1	ENSG00000187735	chr8:54923052-54934086	0.370652
RBM10	ENSG00000182872	chrX:47006897-47028714	-0.525359
ENSG00000237792	ENSG00000237792	chr9:65602810-65631903	0.308813
RBMX2	ENSG00000134597	chrX:129536011-129536229	-0.34572
CEPT1	ENSG00000134255	chr1:111703918-111717501	-0.366192
SLC25A22	ENSG00000177542	chr11:795169-798217	-0.59042
HIPK3	ENSG00000110422	chr11:33369559-33370068	-0.24272
PFKFB4	ENSG00000114268	chr3:48573896-48575931	-0.630801
FAM83D	ENSG00000101447	chr20:37555568-37570602	-0.30518
PEX6	ENSG00000124587	chr6:42936236-42936612	-0.334358
RP11-69E11.4	ENSG00000182109	chr1:39988177-39989234	-0.307006
MTMR1	ENSG00000063601	chrX:149924337-149931038	-0.499895
SIM2	ENSG00000159263	chr21:38072221-38081468	-0.60475
VDAC2	ENSG00000165637	chr10:76984287-76989402	0.564228
ZNF224	ENSG00000267680	chr19:44598683-44598684	-0.222954
NCOA7	ENSG00000111912	chr6:126112213-126136437	-0.480275
ERICH1	ENSG00000104714	chr8:642612-665861	-0.439011
ZNF302	ENSG00000089335	chr19:35169718-35173682	-0.454762
LZTS2	ENSG00000107816	chr10:102762253-102762254	0.338305
MPHOSPH9	ENSG00000051825	chr12:123707674-123714808	0.338625
GZF1	ENSG00000125812	chr20:23346384-23349399	0.408384
PDE8A	ENSG00000073417	chr15:85634412-85641179	-0.471757
BCL2L11	ENSG00000153094	chr2:111902097-111907621	0.456576
YPEL5	ENSG00000119801	chr2:30369928-30379494	-0.400604
HOXB-AS1	ENSG00000230148	chr17:46620999-46621848	-0.286012
SLX1B	ENSG00000181625	chr16:29469336-29469416	-0.322321
NCOR2	ENSG00000196498	chr12:124831396-124832371	-0.384295
RGS20	ENSG00000147509	chr8:54792846-54826057	-0.300824
PSMA3-AS1	ENSG00000257621	chr14:58752474-58753358	0.255341
ENSG00000225241	ENSG00000225241	chr1:144606510-144614840	-0.341125
NAB1	ENSG00000138386	chr2:191518506-191520703	0.360299
FOSL1	ENSG00000175592	chr11:65664477-65667712	-0.230063
MEF2D	ENSG00000116604	chr1:156469352-156470278	0.623858
ATP5S	ENSG00000125375	chr14:50789437-50790663	-0.332297
ELF3	ENSG00000163435	chr1:201979834-201980257	-0.307091
ADGRE5	ENSG00000123146	chr19:14501891-14508470	-0.330586
COX5B	ENSG00000135940	chr2:98263129-98263530	0.429347
ITGB4	ENSG00000132470	chr17:73750896-73751782	-0.452151
NR1D2	ENSG00000174738	chr3:24004096-24006468	-0.384633
AKR1B15	ENSG00000227471	chr7:134249521-134252910	-0.461551
SETD5	ENSG00000168137	chr3:9477590-9482140	-0.299592
C7orf55-LUC7L2	ENSG00000146963	chr7:139045068-139060808	-0.511346
ZBTB25	ENSG00000089775	chr14:64954775-64957079	-0.41615
EIF5	ENSG00000100664	chr14:103800597-103800726	-0.636586
DENND4C	ENSG00000137145	chr9:19332182-19334975	-0.341813
ZC3H7A	ENSG00000122299	chr16:11862951-11864639	-0.419329
OXR1	ENSG00000164830	chr8:107738537-107751686	-0.443428
SETD5	ENSG00000168137	chr3:9506356-9510203	0.248013
BSCL2	ENSG00000168000	chr11:62473089-62474581	-0.330691
TMEM91	ENSG00000142046	chr19:41888826-41888827	-0.228921
DDX3Y	ENSG00000067048	chrY:15026561-15026796	-0.370451
GORAB	ENSG00000120370	chr1:170501425-170508351	-0.468633
MGME1	ENSG00000125871	chr20:17950773-17956327	0.357433
GPCPD1	ENSG00000125772	chr20:5564968-5573973	-0.255162
SEMA4F	ENSG00000135622	chr2:74884751-74889859	-0.340303
AGRN	ENSG00000188157	chr1:986749-986833	-0.272068
TMEM168	ENSG00000146802	chr7:112425008-112430215	-0.358269
LINC01234	ENSG00000249550	chr12:114184400-114204880	-0.456048
ZDHHC7	ENSG00000153786	chr16:85029613-85044892	-0.213985
ANKRD13D	ENSG00000172932	chr11:67059651-67067001	-0.222335
GCC2	ENSG00000135968	chr2:109100767-109102287	0.322158
TSEN54	ENSG00000182173	chr17:73518414-73519356	-0.477124
UBE2J2	ENSG00000160087	chr1:1203372-1209046	-0.303029
PPP1R18	ENSG00000146112	chr6:30654890-30654891	0.404245
TRNT1	ENSG00000072756	chr3:3189871-3190778	0.272317
ASPHD1	ENSG00000174939	chr16:29912062-29912873	-0.447864
CENPN	ENSG00000166451	chr16:81053881-81056360	0.349773
ASXL1	ENSG00000171456	chr20:31017856-31019124	-0.363095
TAOK2	ENSG00000149930	chr16:29998164-29998165	-0.373242
MTIF2	ENSG00000085760	chr2:55476670-55479613	-0.317661
DAPK3	ENSG00000167657	chr19:3963667-3963869	-0.353347
DIDO1	ENSG00000101191	chr20:61528348-61537239	-0.35594
DNTTIP2	ENSG00000067334	chr1:94343418-94344633	-0.244054
WDR20	ENSG00000140153	chr14:102606509-102661275	-0.482771
PPP1R18	ENSG00000146112	chr6:30653823-30654891	-0.271046
IL4R	ENSG00000077238	chr16:27357939-27363861	-0.349641
CMC2	ENSG00000103121	chr16:81031034-81031890	0.327509
ERCC4	ENSG00000175595	chr16:14022092-14024567	-0.496629
CCNT2	ENSG00000082258	chr2:135703716-135705306	-0.436488
RIPK4	ENSG00000183421	chr21:43162157-43165919	0.297134
ZNF655	ENSG00000197343	chr7:99169415-99169868	0.240117
BCL2L11	ENSG00000153094	chr2:111907724-111921710	-0.668071
LINC01021	ENSG00000250337	chr5:27477908-27494342	-0.619493
SAMD4B	ENSG00000179134	chr19:39833216-39844646	-0.270191
ATRX	ENSG00000085224	chrX:76851255-76854880	0.448339
SEC16A	ENSG00000148396	chr9:139338352-139341307	0.260793
SNIP1	ENSG00000163877	chr1:38006356-38018246	-0.482204
JAG1	ENSG00000101384	chr20:10644662-10653349	-0.288987
SLC48A1	ENSG00000211584	chr12:48176000-48176001	-0.27253
ARPP19	ENSG00000128989	chr15:52849419-52861045	-0.291276
PHPT1	ENSG00000054148	chr9:139744954-139744955	-0.211731
COPRS	ENSG00000172301	chr17:30183884-30186120	-0.354721
SIK3	ENSG00000160584	chr11:116734534-116738662	-0.357951
RALA	ENSG00000006451	chr7:39663424-39726230	-0.334574
POM121	ENSG00000196313	chr7:72411055-72411356	-0.407899
FXR2	ENSG00000129245	chr17:7495243-7495572	-0.469059
SCYL1	ENSG00000142186	chr11:65302853-65303424	-0.328569
C20orf196	ENSG00000171984	chr20:5753689-5843670	-0.517486
PRPF4B	ENSG00000112739	chr6:4061934-4062447	-0.641497
DCAKD	ENSG00000172992	chr17:43111410-43111555	0.301199
ITGA2B	ENSG00000005961	chr17:42451838-42452027	-0.409336
PHF12	ENSG00000109118	chr17:27251320-27254009	-0.227532
SLC25A36	ENSG00000114120	chr3:140682069-140689769	-0.517722
RIOK1	ENSG00000124784	chr6:7390306-7393332	-0.319922
DYRK1B	ENSG00000105204	chr19:40322608-40324663	-0.292424
NAA16	ENSG00000172766	chr13:41936295-41941575	-0.366211
MBP	ENSG00000197971	chr18:74817242-74844536	-0.28511
AVIL	ENSG00000135407	chr12:58204910-58207010	-0.485352
MANBA	ENSG00000109323	chr4:103595227-103610731	-0.613081
DPP8	ENSG00000074603	chr15:65793117-65799581	-0.472137
CCDC92	ENSG00000119242	chr12:124428911-124457076	-0.2875
AMMECR1L	ENSG00000144233	chr2:128628933-128631402	-0.312862
FOCAD	ENSG00000188352	chr9:20658825-20715321	-0.23028
MITD1	ENSG00000158411	chr2:99787892-99787973	-0.305677
MRPS10	ENSG00000048544	chr6:42179655-42182018	0.340472
ZBTB5	ENSG00000168795	chr9:37442552-37465212	-0.459919
NCOR2	ENSG00000196498	chr12:124829497-124831110	-0.438697
NR1D2	ENSG00000174738	chr3:24004096-24006468	-0.469735
DNAJB14	ENSG00000164031	chr4:100844342-100851607	-0.594302
PPP2R3C	ENSG00000092020	chr14:35579835-35585816	-0.316128
TJP1	ENSG00000104067	chr15:30092905-30114205	-0.448883
PCMTD2	ENSG00000203880	chr20:62890235-62891295	0.325666
DUSP22	ENSG00000112679	chr6:311962-345854	-0.216549
SLC25A29	ENSG00000197119	chr14:100759714-100765179	-0.322361
MTIF3	ENSG00000122033	chr13:28014586-28019225	-0.311023
USP42	ENSG00000106346	chr7:6180615-6183716	0.707816
PHF23	ENSG00000040633	chr17:7140979-7144125	0.475433
WWP1	ENSG00000123124	chr8:87393858-87410801	0.349823
BNIP1	ENSG00000113734	chr5:172578697-172581325	0.339279
VAPA	ENSG00000101558	chr18:9937063-9950392	-0.300581
ICE1	ENSG00000164151	chr5:5448010-5454665	-0.768252
TBC1D14	ENSG00000132405	chr4:7016284-7026731	-0.366512
ELMO2	ENSG00000062598	chr20:45016076-45017678	-0.383615
TMEM91	ENSG00000142046	chr19:41888826-41889791	-0.227249
MFF	ENSG00000168958	chr2:228195562-228197135	-0.353276
COL27A1	ENSG00000196739	chr9:117008190-117012895	-0.326359
NAB2	ENSG00000166886	chr12:57486978-57488395	0.504553
LYSMD3	ENSG00000176018	chr5:89821117-89825265	-0.587401
HERC4	ENSG00000148634	chr10:69826974-69832640	0.323539
MAPK12	ENSG00000188130	chr22:50695622-50696672	-0.276818
EPHA2	ENSG00000142627	chr1:16475542-16477391	-0.315892
DAPK3	ENSG00000167657	chr19:3969827-3971020	-0.784952
MSANTD3	ENSG00000066697	chr9:103204638-103212839	-0.306732
PRPF4B	ENSG00000112739	chr6:4049340-4049966	-0.333967
FAM107B	ENSG00000065809	chr10:14595386-14646239	-0.355063
CEBPZOS	ENSG00000218739	chr2:37425815-37426847	0.345186
ITGB4	ENSG00000132470	chr17:73739942-73744922	-0.400399
CCT6P1	ENSG00000228409	chr7:65225543-65227934	-0.615614
CUZD1	ENSG00000138161	chr10:124615302-124639001	-0.351962
DHX57	ENSG00000163214	chr2:39042797-39046019	-0.371196
NFE2L2	ENSG00000116044	chr2:178098999-178129260	-0.635514
SPDL1	ENSG00000040275	chr5:169010893-169015398	-0.304021
ZSCAN2	ENSG00000176371	chr15:85147564-85159540	0.238478
GGCX	ENSG00000115486	chr2:85788108-85788509	-0.254184
CAMLG	ENSG00000164615	chr5:134074482-134076753	-0.301483
ENTHD2	ENSG00000167302	chr17:79205821-79206115	-0.243229
SCAF11	ENSG00000139218	chr12:46345510-46355483	-0.479157
REEP4	ENSG00000168476	chr8:21996306-21996929	0.409008
RIPK4	ENSG00000183421	chr21:43164300-43165919	-0.31772
SLU7	ENSG00000164609	chr5:159842317-159846030	-0.304664
LIPE-AS1	ENSG00000213904	chr19:42901376-42912410	0.307173
UBAP2L	ENSG00000143569	chr1:154241430-154242676	-0.364275
RBM39	ENSG00000131051	chr20:34327469-34328746	0.459316
RP11-958N24.2	ENSG00000227827	chr16:16470913-16477521	-0.721438
USP42	ENSG00000106346	chr7:6155154-6175472	-0.442814
DDX5	ENSG00000108654	chr17:62496891-62497175	-0.378236
ZBTB38	ENSG00000177311	chr3:141105779-141122769	-0.377824
DNAJB6	ENSG00000105993	chr7:157202695-157208710	-0.352796
MIS18BP1	ENSG00000129534	chr14:45675373-45679583	-0.448378
EML3	ENSG00000149499	chr11:62376949-62377101	-0.453438
GLS	ENSG00000115419	chr2:191819544-191827556	-0.457116
SEC16A	ENSG00000148396	chr9:139339563-139341307	0.452404
SNRNP70	ENSG00000104852	chr19:49605455-49605456	-0.337237
CTC-260F20.3	ENSG00000258674	chr19:19639495-19640173	0.565772
C17orf61-PLSCR3	ENSG00000262481	chr17:7296271-7296463	-0.279717
HOXA3	ENSG00000105997	chr7:27148339-27149734	-0.305292
COL4A3BP	ENSG00000113163	chr5:74685512-74695135	0.566785
USP12	ENSG00000152484	chr13:27744466-27745729	0.317186
CCNF	ENSG00000162063	chr16:2481285-2485807	0.419078
ENSG00000203849	ENSG00000203849	chr1:142699432-142700037	0.375353
ACBD3	ENSG00000182827	chr1:226353701-226374091	-0.459977
GGT1	ENSG00000100031	chr22:25003699-25003921	0.288229
QSER1	ENSG00000060749	chr11:32953920-32953921	-0.399351
PXMP2	ENSG00000176894	chr12:133294384-133294576	-0.366841
IVNS1ABP	ENSG00000116679	chr1:185275757-185276146	0.40235
WDR35	ENSG00000118965	chr2:20151245-20153595	-0.618265
CBX4	ENSG00000141582	chr17:77809511-77811636	-0.264791
C1orf52	ENSG00000162642	chr1:85724744-85725041	-0.309991
BOD1L1	ENSG00000038219	chr4:13574466-13578462	0.360358
ZCCHC2	ENSG00000141664	chr18:60242159-60242160	-0.327044
INTS2	ENSG00000108506	chr17:59958532-59962262	-0.391963
ATXN7L1	ENSG00000146776	chr7:105515680-105516258	0.460351
SIRT7	ENSG00000187531	chr17:79872406-79872480	-0.221703
RNF145	ENSG00000145860	chr5:158585434-158585848	0.293739
CCP110	ENSG00000103540	chr16:19554082-19554200	-0.306922
G3BP2	ENSG00000138757	chr4:76587233-76598203	0.298163
CENPBD1P1	ENSG00000213753	chr19:59086955-59092612	-0.250202
USP3	ENSG00000140455	chr15:63829355-63845914	-0.283307
ISCU	ENSG00000136003	chr12:108956512-108957836	0.432621
GCN1L1	ENSG00000089154	chr12:120606104-120607973	-0.597561
PAIP1	ENSG00000172239	chr5:43527571-43529888	-0.48839
EIF4E2	ENSG00000135930	chr2:233431924-233433655	-0.283034
FBXO22	ENSG00000167196	chr15:76196970-76205544	-0.392101
PHC2	ENSG00000134686	chr1:33799893-33815198	-0.57256
IQCB1	ENSG00000173226	chr3:121507279-121508920	0.353704
TECR	ENSG00000099797	chr19:14675670-14675761	-0.496052
AKR1B15	ENSG00000227471	chr7:134234001-134249350	-0.354572
DCAF10	ENSG00000122741	chr9:37854979-37857238	0.299126
PHACTR4	ENSG00000204138	chr1:28733974-28785596	-0.532869
YTHDC2	ENSG00000047188	chr5:112927875-112929000	-0.420958
WDR33	ENSG00000136709	chr2:128520733-128522402	0.31934
RUSC1	ENSG00000160753	chr1:155294378-155294636	-0.344905
INSIG1	ENSG00000186480	chr7:155094556-155099951	-0.362498
EIF4H	ENSG00000106682	chr7:73604248-73609071	-0.345264
FAM160A2	ENSG00000051009	chr11:6236141-6238601	-0.322126
RBM41	ENSG00000089682	chrX:106312632-106331666	-0.303379
CRLS1	ENSG00000088766	chr20:5987198-5990421	-0.471151
ABCB10	ENSG00000135776	chr1:229678118-229683246	-0.282541
KAT6A	ENSG00000083168	chr8:41812929-41832222	-0.634573
CADM4	ENSG00000105767	chr19:44131942-44143879	-0.565004
FAM214B	ENSG00000005238	chr9:35107679-35107680	-0.403486
SPIN1	ENSG00000106723	chr9:91003453-91041297	-0.39259
BICC1	ENSG00000122870	chr10:60580228-60588521	-0.477713
FAM214A	ENSG00000047346	chr15:52897443-52900765	-0.323571
STRN4	ENSG00000090372	chr19:47225597-47226067	-0.403677
CROCCP2	ENSG00000215908	chr1:16952994-16953640	-0.562265
QSER1	ENSG00000060749	chr11:32956981-32975403	-0.468758
ENSG00000242676	ENSG00000242676	chr1:142699432-142700037	0.372671
ARRDC2	ENSG00000105643	chr19:18112382-18119520	-0.409675
QSER1	ENSG00000060749	chr11:32954637-32954638	-0.41563
PKD1	ENSG00000008710	chr16:2163293-2164171	-0.329578
GAS2L1	ENSG00000185340	chr22:29706988-29707452	-0.39297
CHD9	ENSG00000177200	chr16:53352252-53355438	-0.37889
HSD11B1L	ENSG00000167733	chr19:5684916-5690042	0.499838
SPATA5L1	ENSG00000171763	chr15:45695716-45697518	-0.326607
C7orf55-LUC7L2	ENSG00000146963	chr7:139045068-139060808	-0.673185
PRKD3	ENSG00000115825	chr2:37544322-37544930	0.535699
FNBP4	ENSG00000109920	chr11:47746330-47747289	0.474816
SRSF1	ENSG00000136450	chr17:56082402-56083162	-0.245296
GIT1	ENSG00000108262	chr17:27902916-27903096	-0.288463
PDE8A	ENSG00000073417	chr15:85635947-85641179	0.499682
SOCS4	ENSG00000180008	chr14:55494189-55509670	-0.507262
CLK2	ENSG00000176444	chr1:155233191-155233741	-0.382137
ZSWIM8	ENSG00000214655	chr10:75555421-75556532	-0.512856
NEAT1	ENSG00000245532	chr11:65191007-65191008	-0.30397
DIABLO	ENSG00000184047	chr12:122709191-122710512	-0.334369
KLHL18	ENSG00000114648	chr3:47324584-47328710	0.481591
TAF3	ENSG00000165632	chr10:8051293-8055694	-0.681911
VEGFA	ENSG00000112715	chr6:43749824-43752278	0.200934
EIF4A2	ENSG00000156976	chr3:186505671-186506914	-0.425468
AGER	ENSG00000204305	chr6:32149016-32149301	0.202669
STIL	ENSG00000123473	chr1:47746617-47746618	-0.562478
VPS36	ENSG00000136100	chr13:53001354-53007797	-0.345645
SUGP2	ENSG00000064607	chr19:19104270-19104271	-0.233891
CNTNAP3B	ENSG00000154529	chr9:43908523-43915360	-0.557563
MEF2D	ENSG00000116604	chr1:156445029-156446804	-0.298872
GLE1	ENSG00000119392	chr9:131267183-131271155	-0.351068
C2CD5	ENSG00000111731	chr12:22610095-22622643	-0.337643
SVIL	ENSG00000197321	chr10:29820217-29839526	-0.346768
ZSWIM7	ENSG00000214941	chr17:15880406-15880407	-0.42329
RWDD3	ENSG00000122481	chr1:95699871-95712098	0.412607
KRT80	ENSG00000167767	chr12:52566202-52566822	-0.303551
TANK	ENSG00000136560	chr2:162017923-162036125	-0.218354
FAM49B	ENSG00000153310	chr8:130891717-130915558	-0.362122
ANGPTL4	ENSG00000167772	chr19:8436406-8438589	-0.321026
DPP8	ENSG00000074603	chr15:65804902-65807994	0.355478
RP11-462L8.1	ENSG00000229656	chr10:33274685-33370270	-0.52377
MDM2	ENSG00000135679	chr12:69202271-69202988	-0.427686
RIMKLB	ENSG00000166532	chr12:8932708-8932709	-0.511406
FUBP3	ENSG00000107164	chr9:133455151-133470870	-0.488573
RHPN2	ENSG00000131941	chr19:33487126-33490492	-0.312298
C1orf216	ENSG00000142686	chr1:36182276-36184308	0.32632
NR4A1	ENSG00000123358	chr12:52445352-52448111	-0.359115
CHD3	ENSG00000170004	chr17:7788401-7792982	-0.438833
NEDD4L	ENSG00000049759	chr18:56001124-56008270	0.263258
BIN1	ENSG00000136717	chr2:127821594-127826500	-0.338562
SMG7	ENSG00000116698	chr1:183441784-183481972	-0.491628
SENP7	ENSG00000138468	chr3:101047390-101049178	0.316966
PHF12	ENSG00000109118	chr17:27240295-27240897	-0.301796
C6orf141	ENSG00000197261	chr6:49519003-49519594	0.523112
NSUN5P1	ENSG00000223705	chr7:75039743-75039889	-0.342111
LINC01021	ENSG00000250337	chr5:27475802-27476194	-0.300179
YTHDF1	ENSG00000149658	chr20:61835159-61845216	-0.441556
MELK	ENSG00000165304	chr9:36651874-36657238	-0.325528
SNRPA	ENSG00000077312	chr19:41256882-41256883	-0.431879
NPFF	ENSG00000139574	chr12:53900926-53900927	-0.467677
CRAMP1L	ENSG00000007545	chr16:1716601-1717963	0.466421
IP6K2	ENSG00000068745	chr3:48728915-48730387	-0.281695
RBM39	ENSG00000131051	chr20:34322179-34326890	-0.364219
PLA2G4C	ENSG00000105499	chr19:48581081-48588316	-0.350237
PRKAG1	ENSG00000181929	chr12:49399635-49406845	-0.426473
SYVN1	ENSG00000162298	chr11:64896186-64897201	-0.369987
VTI1A	ENSG00000151532	chr10:114207225-114208640	-0.371032
SIM2	ENSG00000159263	chr21:38081550-38084833	-0.53658
NUP54	ENSG00000138750	chr4:77065626-77069461	-0.420944
ARMCX6	ENSG00000198960	chrX:100871202-100871203	0.308468
FBXO38	ENSG00000145868	chr5:147763602-147774277	-0.539332
ERRFI1	ENSG00000116285	chr1:8075752-8086218	-0.432692
CCNL1	ENSG00000163660	chr3:156874872-156876655	-0.238099
CHM	ENSG00000188419	chrX:85226590-85233771	0.47344
DNAJC9	ENSG00000213551	chr10:75007566-75007567	-0.319137
PRKD2	ENSG00000105287	chr19:47217258-47219388	-0.305586
TBRG4	ENSG00000136270	chr7:45144308-45145040	-0.347649
GOLGA8B	ENSG00000215252	chr15:34825346-34825347	-0.681901
MEF2A	ENSG00000068305	chr15:100106309-100138635	0.29077
MAP4K3	ENSG00000011566	chr2:39494388-39499424	-0.297464
PI4KB	ENSG00000143393	chr1:151288985-151299747	-0.328089
C9orf3	ENSG00000148120	chr9:97778261-97781732	-0.273519
RAB14	ENSG00000119396	chr9:123955697-123963917	-0.531095
ACIN1	ENSG00000100813	chr14:23540395-23540636	0.553407
N4BP2L2	ENSG00000244754	chr13:33101669-33109906	-0.311428
C1RL	ENSG00000139178	chr12:7249759-7252282	-0.405915
CREM	ENSG00000095794	chr10:35416121-35437296	-0.392441
TANK	ENSG00000136560	chr2:161993574-162036125	-0.216292
DDX23	ENSG00000174243	chr12:49239565-49245867	-0.480988
C14orf159	ENSG00000133943	chr14:91611657-91614125	0.346867
RP11-112J3.16	ENSG00000227388	chr9:35786772-35790153	-0.342695
KLF16	ENSG00000129911	chr19:1854759-1863040	-0.293907
NASP	ENSG00000132780	chr1:46072263-46078841	-0.365297
MMD	ENSG00000108960	chr17:53491593-53499031	-0.254991
IP6K2	ENSG00000068745	chr3:48730612-48732523	-0.321324
SNIP1	ENSG00000163877	chr1:38006356-38018246	-0.388839
POM121	ENSG00000196313	chr7:72411532-72412376	-0.278734
C9orf85	ENSG00000155621	chr9:74562028-74586421	-0.229894
NFE2L2	ENSG00000116044	chr2:178098067-178098733	-0.496896
ATF2	ENSG00000115966	chr2:175945493-175957789	-0.420453
TRMU	ENSG00000100416	chr22:46731743-46733676	-0.316853
CRTC2	ENSG00000160741	chr1:153927642-153930821	-0.506158
KIF2A	ENSG00000068796	chr5:61602363-61642957	-0.345791
KLF6	ENSG00000067082	chr10:3824406-3827105	-0.631997
RBM39	ENSG00000131051	chr20:34326939-34327315	0.293413
TNRC18	ENSG00000182095	chr7:5348999-5352134	-0.300527
CCNT2	ENSG00000082258	chr2:135700244-135703357	0.797832
RBSN	ENSG00000131381	chr3:15122309-15123874	-0.668415
CYB5D2	ENSG00000167740	chr17:4046639-4046640	0.45811
HAUS2	ENSG00000137814	chr15:42851606-42853468	-0.353083
MTCL1	ENSG00000168502	chr18:8809559-8809969	0.596523
TAB3	ENSG00000157625	chrX:30873679-30877604	-0.731753
SEC16A	ENSG00000148396	chr9:139357584-139357915	-0.328107
FBXO21	ENSG00000135108	chr12:117615446-117624282	-0.358416
ALDOC	ENSG00000109107	chr17:26902562-26903819	-0.506122
SDHAF4	ENSG00000154079	chr6:71289269-71298318	-0.367987
BDKRB2	ENSG00000168398	chr14:96703518-96706740	-0.273259
HMGCR	ENSG00000113161	chr5:74633125-74638408	-0.300305
USP6NL	ENSG00000148429	chr10:11569566-11639630	-0.426845
LRP10	ENSG00000197324	chr14:23347779-23348408	0.374111
KLF7	ENSG00000118263	chr2:207989128-208030191	-0.684677
TBX3	ENSG00000135111	chr12:115117456-115117718	0.524264
DESI2	ENSG00000121644	chr1:244816657-244849899	-0.405433
LRRC28	ENSG00000168904	chr15:99796330-99827462	0.27774
KIAA0907	ENSG00000132680	chr1:155884111-155885664	0.27622
RPSA	ENSG00000168028	chr3:39452851-39453140	0.622536
LENG8	ENSG00000167615	chr19:54969700-54969701	-0.479656
ATRX	ENSG00000085224	chrX:76849319-76854880	-0.535337
PPIG	ENSG00000138398	chr2:170487497-170488276	-0.393773
SACM1L	ENSG00000211456	chr3:45773643-45776727	-0.3643
POLG2	ENSG00000256525	chr17:62481985-62486913	-0.391722
MECP2	ENSG00000169057	chrX:153296737-153296847	0.423313
QSER1	ENSG00000060749	chr11:32956981-32975403	-0.552663
DENR	ENSG00000139726	chr12:123238354-123246734	-0.522639
PREB	ENSG00000138073	chr2:27354950-27355098	-0.302207
PROSER1	ENSG00000120685	chr13:39588613-39591637	-0.530287
BCL2L11	ENSG00000153094	chr2:111881716-111907621	-0.357225
SETD2	ENSG00000181555	chr3:47108608-47125210	-0.407749
LHFPL2	ENSG00000145685	chr5:77784976-77805607	-0.21837
GZF1	ENSG00000125812	chr20:23346384-23347640	-0.52288
BAZ1A	ENSG00000198604	chr14:35255207-35261981	0.307151
S100PBP	ENSG00000116497	chr1:33295668-33318680	-0.379574
GZF1	ENSG00000125812	chr20:23349566-23350221	-0.430189
RBMX	ENSG00000147274	chrX:135954504-135955405	0.3826
FNBP4	ENSG00000109920	chr11:47746330-47752926	-0.446764
PIGF	ENSG00000151665	chr2:46808730-46819614	-0.263561
TPRKB	ENSG00000144034	chr2:73959827-73961556	-0.418272
FAM217B	ENSG00000196227	chr20:58517567-58518995	-0.66642
CTIF	ENSG00000134030	chr18:46386800-46387588	0.441112
ERI2	ENSG00000196678	chr16:20809533-20810585	0.584059
IDS	ENSG00000241489	chrX:148582568-148585687	0.686205
PLAU	ENSG00000122861	chr10:75671370-75671799	-0.378846
ENSG00000184886	ENSG00000184886	chr17:34891440-34892943	-0.342053
ENSG00000108264	ENSG00000108264	chr17:35797930-35800606	-0.335866
KIF1B	ENSG00000054523	chr1:10357304-10363221	0.320418
MOAP1	ENSG00000165943	chr14:93651058-93651155	-0.413581
MALAT1	ENSG00000251562	chr11:65270107-65270108	-0.915284
CLDND1	ENSG00000080822	chr3:98240286-98240497	0.272071
RP11-958N24.1	ENSG00000183458	chr16:15027350-15035669	0.334475
STX1A	ENSG00000106089	chr7:73119554-73122919	-0.371859
PANK1	ENSG00000152782	chr10:91353746-91359009	-0.535234
COL27A1	ENSG00000196739	chr9:116997932-116999261	-0.387362
ZCCHC2	ENSG00000141664	chr18:60242530-60242531	-0.393615
CLASP1	ENSG00000074054	chr2:122166623-122168442	0.34071
RPRD2	ENSG00000163125	chr1:150444358-150444359	-0.553785
SEC16A	ENSG00000148396	chr9:139352036-139353586	-0.328369
CCDC92	ENSG00000119242	chr12:124430347-124432458	0.463634
PIGA	ENSG00000165195	chrX:15344168-15349338	-0.332262
NUF2	ENSG00000143228	chr1:163292002-163295822	-0.351638
ASXL1	ENSG00000171456	chr20:30956926-31015931	-0.319146
CARD8	ENSG00000105483	chr19:48735750-48737086	0.320741
HECTD1	ENSG00000092148	chr14:31643012-31644117	-0.519372
MANBA	ENSG00000109323	chr4:103611928-103635595	-0.390167
REV3L	ENSG00000009413	chr6:111628773-111631056	-0.32725
KCNAB2	ENSG00000069424	chr1:6086505-6100577	0.387608
EFCAB7	ENSG00000203965	chr1:64017505-64021029	-0.396093
CCDC58	ENSG00000160124	chr3:122090647-122102021	-0.297546
C2orf42	ENSG00000115998	chr2:70406774-70408295	-0.306743
MTF2	ENSG00000143033	chr1:93545088-93575787	-0.390836
PPP1R35	ENSG00000160813	chr7:100033156-100033471	0.428475
SPG7	ENSG00000197912	chr16:89599044-89611056	-0.249223
TIA1	ENSG00000116001	chr2:70456223-70456396	-0.225959
STIL	ENSG00000123473	chr1:47746035-47746618	0.438205
DMXL2	ENSG00000104093	chr15:51743894-51745747	-0.31081
NCOR2	ENSG00000196498	chr12:124825297-124826369	-0.552059
RAB22A	ENSG00000124209	chr20:56886178-56918774	-0.313557
KIFC3	ENSG00000140859	chr16:57819578-57822487	0.271591
PI4KB	ENSG00000143393	chr1:151297393-151298648	0.222508
USP34	ENSG00000115464	chr2:61541288-61541720	0.309773
TRPC1	ENSG00000144935	chr3:142462428-142467100	0.392877
PAPD4	ENSG00000164329	chr5:78941015-78944440	-0.481475
PTGES3	ENSG00000110958	chr12:57080701-57081034	0.297431
HIRA	ENSG00000100084	chr22:19343811-19344413	-0.357743
ZNF274	ENSG00000171606	chr19:58721439-58722926	-0.690421
LARP6	ENSG00000166173	chr15:71128844-71146228	-0.253338
RSRP1	ENSG00000117616	chr1:25568917-25568918	-0.239575
BPTF	ENSG00000171634	chr17:65955991-65960328	-0.255302
SETD5	ENSG00000168137	chr3:9470693-9475529	-0.27954
MTHFD2L	ENSG00000163738	chr4:75026487-75026488	-0.35853
ARL14EP	ENSG00000152219	chr11:30344749-30354413	0.304886
KLF7	ENSG00000118263	chr2:207953305-207988498	-0.36847
C17orf85	ENSG00000074356	chr17:3725346-3728236	-0.2236
PDLIM5	ENSG00000163110	chr4:95445026-95494502	-0.258325
COX20	ENSG00000203667	chr1:244999058-245005246	-0.350734
GCN1L1	ENSG00000089154	chr12:120621480-120621915	-0.433095
DIO3OS	ENSG00000258498	chr14:102025171-102031186	0.23742
SETD5	ENSG00000168137	chr3:9510259-9512143	-0.666158
PPIP5K2	ENSG00000145725	chr5:102515889-102520373	-0.378514
ARMCX6	ENSG00000198960	chrX:100870750-100870751	0.309109
PRPF4B	ENSG00000112739	chr6:4049340-4049586	0.302918
RP11-89K21.1	ENSG00000259439	chr2:45158616-45162419	0.338189
SLC25A44	ENSG00000160785	chr1:156164038-156169626	-0.509333
NOD1	ENSG00000106100	chr7:30485840-30486583	-0.256359
KCTD6	ENSG00000168301	chr3:58477896-58484440	-0.470141
ELK3	ENSG00000111145	chr12:96641061-96641381	0.297743
ANKRD13A	ENSG00000076513	chr12:110468563-110471602	-0.332815
RSRC2	ENSG00000111011	chr12:123006846-123011395	-0.322512
FNIP1	ENSG00000217128	chr5:131042884-131044894	0.537417
ZNF480	ENSG00000198464	chr19:52803737-52819087	0.322904
MTCL1	ENSG00000168502	chr18:8807058-8812977	-0.317872
MTERF3	ENSG00000156469	chr8:97270928-97273729	-0.318393
PFKFB4	ENSG00000114268	chr3:48574253-48575931	0.661504
SIM2	ENSG00000159263	chr21:38117437-38119966	-0.783692
XPO1	ENSG00000082898	chr2:61749818-61753555	-0.269564
FAM214B	ENSG00000005238	chr9:35107565-35107566	-0.328072
NAA16	ENSG00000172766	chr13:41936295-41941575	-0.380407
CASP7	ENSG00000165806	chr10:115439108-115457253	-0.271386
MTCL1	ENSG00000168502	chr18:8807058-8812977	-0.338744
IL4R	ENSG00000077238	chr16:27372136-27373573	-0.578175
AMPD2	ENSG00000116337	chr1:110171117-110171731	0.340846
UBE2D1	ENSG00000072401	chr10:60094985-60121098	-0.317963
HIPK1	ENSG00000163349	chr1:114484081-114495388	-0.355814
HSD11B1L	ENSG00000167733	chr19:5685130-5685313	0.322217
NFKBIZ	ENSG00000144802	chr3:101568761-101570929	-0.344252
CSNK1G1	ENSG00000169118	chr15:64464184-64472547	-0.311237
FAM49B	ENSG00000153310	chr8:130916831-130983189	-0.301113
SNX4	ENSG00000114520	chr3:125188363-125195539	-0.461549
LATS2	ENSG00000150457	chr13:21549503-21553830	-0.282071
WASH1	ENSG00000181404	chr9:18492-24851	-0.320474
AVL9	ENSG00000105778	chr7:32609766-32612811	-0.311846
ELOVL6	ENSG00000170522	chr4:111119523-111119524	-0.361357
CARD8	ENSG00000105483	chr19:48735750-48737660	-0.388723
CROCCP2	ENSG00000215908	chr1:16952500-16953640	0.563059
NUP50	ENSG00000093000	chr22:45564127-45567481	-0.560754
EIF4A2	ENSG00000156976	chr3:186505671-186506914	-0.479985
HECTD1	ENSG00000092148	chr14:31582690-31583492	0.290085
CCDC91	ENSG00000123106	chr12:28378794-28410135	-0.427217
CAPN15	ENSG00000103326	chr16:583998-596817	-0.364893
DNAJC4	ENSG00000110011	chr11:63998412-63998504	0.292394
BCL2L13	ENSG00000099968	chr22:18189591-18209443	0.434146
N6AMT2	ENSG00000150456	chr13:21311944-21331594	-0.473975
FBXO38	ENSG00000145868	chr5:147763602-147774277	-0.452793
PEX13	ENSG00000162928	chr2:61244986-61258554	-0.531615
ICE2	ENSG00000128915	chr15:60740344-60741047	-0.334555
LINC01578	ENSG00000272888	chr15:93426416-93428745	-0.413525
MEF2D	ENSG00000116604	chr1:156450763-156452229	-0.564275
SERTAD3	ENSG00000167565	chr19:40947993-40950122	-0.5485
RELB	ENSG00000104856	chr19:45532250-45535792	-0.458261
SCO2	ENSG00000130489	chr22:50962853-50963901	-0.526255
HMGN4	ENSG00000182952	chr6:26538729-26545355	-0.284162
IFNGR2	ENSG00000159128	chr21:34775922-34787195	-0.320616
ZNF720	ENSG00000197302	chr16:31724756-31733947	-0.476695
CEBPZOS	ENSG00000218739	chr2:37428869-37429006	-0.342733
pk	ENSG00000091436	chr2:174081978-174085878	0.424726
PEX1	ENSG00000127980	chr7:92122443-92123607	-0.319041
STRN3	ENSG00000196792	chr14:31382863-31398407	-0.418038
TRAPPC12	ENSG00000171853	chr2:3469466-3481466	-0.354841
RAB30-AS1	ENSG00000246067	chr11:82784489-82802295	-0.833257
MANBA	ENSG00000109323	chr4:103586009-103590120	-0.356359
PLXNB2	ENSG00000196576	chr22:50724716-50725540	-0.496628
MNX1	ENSG00000130675	chr7:156798567-156799173	-0.323943
C9orf3	ENSG00000148120	chr9:97690813-97717459	-0.403834
OSMR	ENSG00000145623	chr5:38904605-38905234	0.212598
CHD2	ENSG00000173575	chr15:93536228-93540187	-0.318811
SPAG7	ENSG00000091640	chr17:4869614-4869696	-0.332601
ZNF513	ENSG00000163795	chr2:27603115-27603339	-0.291404
EOGT	ENSG00000163378	chr3:69061950-69062725	-0.622671
MFF	ENSG00000168958	chr2:228190143-228193394	-0.325918
MLK4	ENSG00000143674	chr1:233464579-233482188	-0.395492
SPATA6L	ENSG00000106686	chr9:4654804-4656041	0.432887
DGKZ	ENSG00000149091	chr11:46391100-46392863	0.479307
ZBED5	ENSG00000236287	chr11:10876633-10877691	-0.406829
SENP7	ENSG00000138468	chr3:101047533-101049178	-0.328694
PMAIP1	ENSG00000141682	chr18:57567467-57569879	-0.259815
STRN	ENSG00000115808	chr2:37132761-37143221	-0.428398
CHD2	ENSG00000173575	chr15:93536228-93540187	-0.280082
SPDL1	ENSG00000040275	chr5:169010893-169015398	-0.348907
DAGLB	ENSG00000164535	chr7:6485735-6487379	-0.410535
GPBP1	ENSG00000062194	chr5:56531859-56542127	-0.480358
KIF23	ENSG00000137807	chr15:69733418-69737129	0.620683
PKD1P6	ENSG00000270580	chr16:15212911-15219548	-0.337841
MFHAS1	ENSG00000147324	chr8:8643565-8654875	-0.615417
CHSY1	ENSG00000131873	chr15:101719185-101728198	0.454996
ABCD4	ENSG00000119688	chr14:74764772-74766251	0.305541
ASB7	ENSG00000183475	chr15:101170247-101188528	-0.320041
NLK	ENSG00000087095	chr17:26523205-26523206	-0.518552
RRN3	ENSG00000085721	chr16:15180115-15185172	0.24698
MIB2	ENSG00000197530	chr1:1551994-1552458	0.255446
LRRFIP2	ENSG00000093167	chr3:37170640-37190385	-0.308119
EDEM3	ENSG00000116406	chr1:184662046-184663178	0.446797
NEK8	ENSG00000160602	chr17:27068589-27068977	-0.362029
HMGCS1	ENSG00000112972	chr5:43307926-43313458	-0.287596
TAB3	ENSG00000157625	chrX:30849692-30861083	0.479821
EML3	ENSG00000149499	chr11:62376604-62376826	-0.473095
RRN3	ENSG00000085721	chr16:15180311-15185172	-0.282495
ZNF146	ENSG00000167635	chr19:36706098-36719650	0.314168
VPS29	ENSG00000111237	chr12:110936664-110936665	-0.504116
PPIP5K2	ENSG00000145725	chr5:102515889-102520373	-0.377513
SETD5	ENSG00000168137	chr3:9439661-9466151	-0.564305
FAM179B	ENSG00000198718	chr14:45515906-45521639	-0.315063
COX11	ENSG00000166260	chr17:53029473-53031022	0.531395
ST7L	ENSG00000007341	chr1:113153316-113153317	-0.282947
HIST1H2BD	ENSG00000158373	chr6:26158787-26171203	-0.373491
PPIP5K2	ENSG00000145725	chr5:102520445-102522021	0.337665
LEMD3	ENSG00000174106	chr12:65564898-65604706	-0.660454
TIAL1	ENSG00000151923	chr10:121336262-121336592	0.213112
SNHG1	ENSG00000255717	chr11:62622023-62622605	0.388968
PAN2	ENSG00000135473	chr12:56726992-56727646	-0.358706
CSNK2B-LY6G5B--991	ENSG00000263020	chr6:31638785-31638933	0.334501
NT5C3A	ENSG00000122643	chr7:33066527-33102180	-0.516295
MRPL50	ENSG00000136897	chr9:104151769-104151770	-0.255779
MTMR14	ENSG00000163719	chr3:9695453-9703951	-0.506427
PPM1A	ENSG00000100614	chr14:60716395-60749402	-0.450988
TROVE2	ENSG00000116747	chr1:193038764-193039684	0.321258
TSEN54	ENSG00000182173	chr17:73518414-73519356	-0.470608
NME4	ENSG00000103202	chr16:448394-448395	-0.300353
DCUN1D4	ENSG00000109184	chr4:52726829-52729603	0.391801
MEF2B	ENSG00000213999	chr19:19257684-19257845	-0.405597
ZZZ3	ENSG00000036549	chr1:78050340-78097535	-0.410295
ERRFI1	ENSG00000116285	chr1:8074456-8075368	-0.290454
WDR37	ENSG00000047056	chr10:1139436-1142110	-0.616748
ILKAP	ENSG00000132323	chr2:239102972-239103296	0.267211
RP11-452F19.3	ENSG00000228106	chr1:222997287-223000770	0.292049
ARID2	ENSG00000189079	chr12:46254732-46285563	-0.418653
EIF4H	ENSG00000106682	chr7:73604248-73609071	-0.327551
ASB1	ENSG00000065802	chr2:239344654-239352983	-0.343413
RPARP-AS1	ENSG00000269609	chr10:104210775-104215094	0.256367
LRR1	ENSG00000165501	chr14:50069186-50080974	0.209069
NCOR2	ENSG00000196498	chr12:124819826-124820029	-0.285575
EXOC2	ENSG00000112685	chr6:637861-693019	-0.407313
C5orf51	ENSG00000205765	chr5:41904569-41907838	-0.359818
WDR73	ENSG00000177082	chr15:85189067-85189415	-0.407907
PHF20	ENSG00000025293	chr20:34389527-34411180	0.483001
LEMD3	ENSG00000174106	chr12:65564898-65604706	-0.486894
SMAD6	ENSG00000137834	chr15:67009478-67044401	0.348876
GPCPD1	ENSG00000125772	chr20:5564968-5573973	-0.301837
C9orf91	ENSG00000157693	chr9:117405679-117405680	-0.354168
ZFPM2-AS1	ENSG00000251003	chr8:106810670-106939879	-0.377926
GINS4	ENSG00000147536	chr8:41387817-41393879	-0.531953
SSFA2	ENSG00000138434	chr2:182781154-182783325	-0.582293
HUWE1	ENSG00000086758	chrX:53589890-53590707	-0.243854
GPCPD1	ENSG00000125772	chr20:5585086-5591488	-0.439377
BCL2L11	ENSG00000153094	chr2:111881537-111881538	-0.402195
SLC35B3	ENSG00000124786	chr6:8419118-8419813	0.561727
IL11	ENSG00000095752	chr19:55879937-55880137	-0.552119
HERC4	ENSG00000148634	chr10:69716733-69726440	-0.381016
ERBB2IP	ENSG00000112851	chr5:65350779-65364705	0.224981
ZSWIM8	ENSG00000214655	chr10:75555421-75556532	-0.489586
RLTPR	ENSG00000159753	chr16:67690548-67691142	0.591222
ANKRD28	ENSG00000206560	chr3:15709812-15711617	0.343915
MGAT5B	ENSG00000167889	chr17:74928857-74934070	0.244256
ZNF274	ENSG00000171606	chr19:58718568-58721327	-0.701474
MAX	ENSG00000125952	chr14:65560533-65569022	-0.355504
PKD1P1	ENSG00000244257	chr16:16411634-16412780	0.442421
NCAPD3	ENSG00000151503	chr11:134093376-134093757	0.294356
GBF1	ENSG00000107862	chr10:104130617-104136029	0.287191
ERN1	ENSG00000178607	chr17:62175601-62207336	-0.664834
BAZ2B	ENSG00000123636	chr2:160176929-160181322	-0.369683
LINC01089	ENSG00000212694	chr12:122234148-122237753	-0.307189
SCML1	ENSG00000047634	chrX:17762339-17762340	-0.790349
EXOC5	ENSG00000070367	chr14:57714430-57735340	-0.344931
DNAJB14	ENSG00000164031	chr4:100826863-100827674	-0.345205
ELK3	ENSG00000111145	chr12:96641061-96641062	-0.393361
GRB10	ENSG00000106070	chr7:50778687-50793710	0.580288
STRN3	ENSG00000196792	chr14:31388312-31404369	-0.501178
ANKRD27	ENSG00000105186	chr19:33098738-33106564	-0.336168
UBR5	ENSG00000104517	chr8:103281336-103282267	-0.312431
SSX2IP	ENSG00000117155	chr1:85116210-85117566	-0.371818
PPP1R8	ENSG00000117751	chr1:28157757-28157758	0.231634
POMT2	ENSG00000009830	chr14:77744851-77745072	-0.29518
ERF	ENSG00000105722	chr19:42753890-42753979	-0.272712
C5orf28	ENSG00000151881	chr5:43454145-43483924	-0.457975
AZI2	ENSG00000163512	chr3:28368441-28373860	-0.32178
TMEM107	ENSG00000179029	chr17:8077590-8079518	-0.286192
RP1-283E3.8	ENSG00000268575	chr1:1639023-1639619	-0.370246
KANSL2	ENSG00000139620	chr12:49075424-49075970	-0.444606
CYTH1	ENSG00000108669	chr17:76705814-76732774	-0.488302
LINC00342	ENSG00000232931	chr2:96479893-96479894	-0.555118
RASEF	ENSG00000165105	chr9:85597697-85605306	-0.349094
CAAP1	ENSG00000120159	chr9:26887511-26892411	-0.369143
N4BP2L2	ENSG00000244754	chr13:33111164-33112755	-0.35731
C11orf49	ENSG00000149179	chr11:47008861-47073939	-0.336714
EPC1	ENSG00000120616	chr10:32562209-32573626	-0.552197
RSRC2	ENSG00000111011	chr12:123006846-123011395	-0.426988
FGFR1OP2	ENSG00000111790	chr12:27110676-27116275	-0.274606
GRAMD1A	ENSG00000089351	chr19:35491390-35500023	-0.291772
ZRANB2	ENSG00000132485	chr1:71531435-71531436	-0.239729
IL11	ENSG00000095752	chr19:55880309-55881672	-0.499275
CDK5R1	ENSG00000176749	chr17:30815104-30815105	-0.556916
ZNF195	ENSG00000005801	chr11:3381795-3382973	0.345426
SPATA5L1	ENSG00000171763	chr15:45707977-45709467	-0.357717
WHSC1L1	ENSG00000147548	chr8:38137199-38139018	-0.354522
ATG4A	ENSG00000101844	chrX:107369417-107372011	-0.583619
CD44	ENSG00000026508	chr11:35211612-35226059	-0.801577
BAIAP2L2	ENSG00000128298	chr22:38494489-38503859	-0.371324
FOXN2	ENSG00000170802	chr2:48541953-48573340	-0.433611
RP1-283E3.8	ENSG00000268575	chr1:1636094-1636343	-0.478816
FRYL	ENSG00000075539	chr4:48503750-48507564	-0.267193
FADS3	ENSG00000221968	chr11:61644249-61644250	-0.286485
LRRFIP2	ENSG00000093167	chr3:37107433-37116515	-0.30596
HIST1H2BD	ENSG00000158373	chr6:26158787-26171203	-0.319704
PSMG1	ENSG00000183527	chr21:40553804-40555178	-0.327388
WWP1	ENSG00000123124	chr8:87393858-87410801	0.400647
CARKD	ENSG00000213995	chr13:111276626-111279786	0.537563
CYFIP2	ENSG00000055163	chr5:156693594-156712349	0.435202
BCL2L2-PABPN1	ENSG00000258643	chr14:23777408-23788944	-0.238099
LINC00342	ENSG00000232931	chr2:96480418-96480419	-0.482935
CAB39	ENSG00000135932	chr2:231577945-231624674	-0.726374
POMT1	ENSG00000130714	chr9:134397611-134398319	-0.29645
MRPL2	ENSG00000112651	chr6:43022224-43023283	-0.301946
AGAP3	ENSG00000133612	chr7:150837203-150838985	-0.535688
EPC1	ENSG00000120616	chr10:32594859-32596882	0.396511
EHMT2	ENSG00000204371	chr6:31856524-31857005	0.391528
PHC2	ENSG00000134686	chr1:33799893-33800767	0.772106
CLK1	ENSG00000013441	chr2:201724469-201724848	0.483667
TNFAIP3	ENSG00000118503	chr6:138196172-138196973	-0.399206
GAS2L1	ENSG00000185340	chr22:29706988-29707452	-0.430846
BIRC6	ENSG00000115760	chr2:32824967-32828073	-0.362768
INSIG1	ENSG00000186480	chr7:155094556-155099951	-0.354702
SIRT6	ENSG00000077463	chr19:4174943-4175025	-0.336196
BAZ2B	ENSG00000123636	chr2:160269056-160284822	-0.290378
RGL2	ENSG00000237441	chr6:33266428-33267157	0.68102
PAN2	ENSG00000135473	chr12:56716542-56716846	-0.381023
RIC8B	ENSG00000111785	chr12:107254190-107279682	-0.352314
CHD9	ENSG00000177200	chr16:53265696-53269097	-0.436412
FARSB	ENSG00000116120	chr2:223507724-223513459	-0.452939
C4orf46	ENSG00000205208	chr4:159590920-159592768	-0.345779
SPECC1	ENSG00000128487	chr17:20059549-20107646	-0.408021
SMNDC1	ENSG00000119953	chr10:112063345-112064506	-0.375555
TEAD2	ENSG00000074219	chr19:49858676-49860509	-0.313862
THRAP3	ENSG00000054118	chr1:36752871-36754661	-0.361101
HIRA	ENSG00000100084	chr22:19338969-19340879	-0.376071
BAZ1B	ENSG00000009954	chr7:72856510-72856511	-0.504492
ZNF71	ENSG00000197951	chr19:57112959-57125180	0.596371
SPDL1	ENSG00000040275	chr5:169015579-169018052	-0.373835
MALAT1	ENSG00000251562	chr11:65269864-65269865	-0.681083
KIAA1217	ENSG00000120549	chr10:24834032-24834756	0.497456
STK19	ENSG00000204344	chr6:31939993-31940079	0.413292
USP10	ENSG00000103194	chr16:84733717-84767041	-0.363753
COL27A1	ENSG00000196739	chr9:116973306-116982071	-0.340075
PPP1R21	ENSG00000162869	chr2:48678215-48681695	0.38839
DNAJC25	ENSG00000059769	chr9:114394023-114405137	-0.695081
PRKAG1	ENSG00000181929	chr12:49406893-49412515	-0.691802
CLK2	ENSG00000176444	chr1:155236686-155237801	-0.337174
NCOR2	ENSG00000196498	chr12:124824989-124826369	0.527872
CD3EAP	ENSG00000117877	chr19:45910578-45911391	0.326957
POLG2	ENSG00000256525	chr17:62481985-62486913	-0.452211
THAP5	ENSG00000177683	chr7:108206466-108209934	-0.242333
BTN2A2	ENSG00000124508	chr6:26383527-26384020	0.659266
REV3L	ENSG00000009413	chr6:111650941-111652879	-0.31122
KLF5	ENSG00000102554	chr13:73638021-73649846	-0.28747
POLR2B	ENSG00000047315	chr4:57873168-57876527	-0.409438
FIBCD1	ENSG00000130720	chr9:133813602-133813923	0.369189
KIAA0895	ENSG00000164542	chr7:36374787-36375763	0.456424
ZSWIM7	ENSG00000214941	chr17:15880406-15880560	0.607115
MLLT10	ENSG00000078403	chr10:21827841-21875223	-0.369415
PTPN3	ENSG00000070159	chr9:112219495-112219572	-0.464739
S100A6	ENSG00000197956	chr1:153507836-153508593	-0.353319
SDF2	ENSG00000132581	chr17:26982501-26989064	-0.536471
ENSG00000225241	ENSG00000225241	chr1:144596473-144598512	-0.452588
RAP1GAP	ENSG00000076864	chr1:21929406-21930328	0.452402
CTIF	ENSG00000134030	chr18:46386800-46387588	0.451138
IST1	ENSG00000182149	chr16:71957283-71958672	-0.431374
SP100	ENSG00000067066	chr2:231375881-231379810	-0.342521
AGPAT5	ENSG00000155189	chr8:6566408-6582391	-0.359216
INO80B	ENSG00000115274	chr2:74683399-74684461	-0.29906
NPM1	ENSG00000181163	chr5:170819982-170827157	-0.351302
MVD	ENSG00000167508	chr16:88725128-88729419	-0.323906
FXR1	ENSG00000114416	chr3:180688146-180693910	-0.39966
STRN	ENSG00000115808	chr2:37132761-37143221	-0.333042
SMG7	ENSG00000116698	chr1:183441784-183481972	-0.502629
AMBRA1	ENSG00000110497	chr11:46465148-46515158	-0.330721
CPEB2	ENSG00000137449	chr4:15018902-15034785	-0.377094
TVP23C-CDRT4	ENSG00000259024	chr17:15458678-15466751	-0.383402
FCF1	ENSG00000119616	chr14:75181646-75182654	-0.334924
CCNT2	ENSG00000082258	chr2:135696632-135700182	-0.490146
SERTAD3	ENSG00000167565	chr19:40947993-40950122	-0.513634
ZNF638	ENSG00000075292	chr2:71607695-71623271	-0.390489
PHF12	ENSG00000109118	chr17:27254081-27277083	-0.238773
DMTF1	ENSG00000135164	chr7:86797359-86800311	0.250845
C1orf106	ENSG00000163362	chr1:200870287-200876962	-0.400505
C4orf32	ENSG00000174749	chr4:113102014-113107849	0.379467
CAMLG	ENSG00000164615	chr5:134077213-134079677	-0.376262
TRPM7	ENSG00000092439	chr15:50878685-50881789	-0.325493
PANK1	ENSG00000152782	chr10:91353746-91359009	-0.379355
C22orf39	ENSG00000242259	chr22:19338969-19340879	-0.378021
SMC6	ENSG00000163029	chr2:17927218-17934893	-0.339705
NUF2	ENSG00000143228	chr1:163292885-163295822	0.432796
RIN2	ENSG00000132669	chr20:19956431-19970650	-0.41885
ORC3	ENSG00000135336	chr6:88304125-88311502	-0.453759
EML3	ENSG00000149499	chr11:62379068-62379908	-0.766007
CTDSPL2	ENSG00000137770	chr15:44792011-44806796	-0.418799
NCOA7	ENSG00000111912	chr6:126236626-126242089	-0.338176
IKBKAP	ENSG00000070061	chr9:111664288-111665119	0.275632
PTHLH	ENSG00000087494	chr12:28122449-28122614	0.455227
MRPS18B	ENSG00000204568	chr6:30587766-30592660	0.307308
ZC3H7A	ENSG00000122299	chr16:11890271-11890980	0.410832
ALDOC	ENSG00000109107	chr17:26902562-26903819	-0.608884
NIPA2	ENSG00000140157	chr15:23033413-23033894	0.358839
MLK4	ENSG00000143674	chr1:233490757-233497799	-0.290127
AZI2	ENSG00000163512	chr3:28368441-28373860	-0.318261
SREK1	ENSG00000153914	chr5:65454058-65454637	0.520133
CYP4F3	ENSG00000186529	chr19:15757915-15758007	0.204022
RIMKLB	ENSG00000166532	chr12:8930398-8933171	-0.472724
TMEM147-AS1	ENSG00000236144	chr19:36032486-36032653	0.226722
TAOK2	ENSG00000149930	chr16:29997825-29997826	-0.328105
FXR1	ENSG00000114416	chr3:180630524-180651122	-0.315326
HYKK	ENSG00000188266	chr15:78819905-78834247	0.349089
STIM2	ENSG00000109689	chr4:27019606-27024141	-0.372791
NAT14	ENSG00000090971	chr19:55997147-55997775	-0.287268
INTS10	ENSG00000104613	chr8:19703308-19709160	-0.289335
WASH1	ENSG00000181404	chr9:18492-24851	-0.352391
ACIN1	ENSG00000100813	chr14:23538826-23540334	0.31462
ZNF638	ENSG00000075292	chr2:71607695-71623271	-0.429147
ERBB3	ENSG00000065361	chr12:56481426-56481805	0.363076
MSL3	ENSG00000005302	chrX:11777911-11777912	0.336237
SUN1	ENSG00000164828	chr7:856310-872142	-0.338168
ZNF451	ENSG00000112200	chr6:57015660-57017019	-0.445045
PARP6	ENSG00000137817	chr15:72559163-72559816	0.302357
RIPK4	ENSG00000183421	chr21:43166931-43169314	-0.476435
C1D	ENSG00000197223	chr2:68280269-68290090	0.332043
SPIN2B	ENSG00000186787	chrX:57146534-57146838	0.492545
NT5C3A	ENSG00000122643	chr7:33075600-33080484	0.663485
PROSER2	ENSG00000148426	chr10:11865469-11893996	-0.52624
ATG2B	ENSG00000066739	chr14:96752322-96755993	-0.784602
FAM208B	ENSG00000108021	chr10:5800955-5803253	-0.394745
FXR1	ENSG00000114416	chr3:180630524-180651122	-0.304135
C11orf73	ENSG00000149196	chr11:86056135-86056136	-0.419593
BAIAP2L2	ENSG00000128298	chr22:38483271-38493039	0.58769
BCL10	ENSG00000142867	chr1:85736589-85741979	-0.285205
HNRNPA1	ENSG00000135486	chr12:54678101-54680446	-0.90847
KMT2D	ENSG00000167548	chr12:49416658-49418361	-0.301915
AGAP3	ENSG00000133612	chr7:150817232-150820881	-0.329553
FUBP1	ENSG00000162613	chr1:78412261-78412262	-0.502556
ZNF480	ENSG00000198464	chr19:52803737-52817406	-0.342093
TBPL1	ENSG00000028839	chr6:134274563-134301220	-0.576984
SLC25A17	ENSG00000100372	chr22:41190584-41195027	-0.32978
CHERP	ENSG00000085872	chr19:16646447-16652681	-0.357036
GSK3A	ENSG00000105723	chr19:42734543-42734831	0.741722
LATS2	ENSG00000150457	chr13:21555787-21557363	-0.282832
KIAA0907	ENSG00000132680	chr1:155884111-155885664	0.317611
SIM2	ENSG00000159263	chr21:38084922-38092122	-0.426469
AKR1C2	ENSG00000151632	chr10:5049698-5060092	0.207878
MADD	ENSG00000110514	chr11:47346128-47348289	-0.410271
IRF3	ENSG00000126456	chr19:50166771-50167931	-0.296112
INTS2	ENSG00000108506	chr17:59958532-59962262	-0.44506
SIRT7	ENSG00000187531	chr17:79870490-79871083	0.526909
TTC31	ENSG00000115282	chr2:74719874-74720049	-0.400447
SCML1	ENSG00000047634	chrX:17755800-17762191	0.626252
MBTD1	ENSG00000011258	chr17:49272722-49278953	-0.51052
TINF2	ENSG00000092330	chr14:24709269-24709270	-0.350525
RAB11FIP3	ENSG00000090565	chr16:539000-546824	-0.287314
TAOK2	ENSG00000149930	chr16:30001126-30002105	-0.441762
TCF7L2	ENSG00000148737	chr10:114799885-114900943	-0.382682
MMD	ENSG00000108960	chr17:53491593-53499031	-0.33778
BCL7A	ENSG00000110987	chr12:122473333-122481792	-0.389989
IP6K2	ENSG00000068745	chr3:48728915-48730387	-0.408773
MAX	ENSG00000125952	chr14:65560533-65569022	-0.349877
CBX4	ENSG00000141582	chr17:77809194-77809445	-0.211877
ANKRD10	ENSG00000088448	chr13:111545610-111558380	-0.496754
ZBTB33	ENSG00000177485	chrX:119384832-119387269	-0.470951
FBXO5	ENSG00000112029	chr6:153296756-153303992	-0.400348
USP10	ENSG00000103194	chr16:84733717-84767041	-0.385506
BRD1	ENSG00000100425	chr22:50171461-50181038	-0.292907
FAM24B	ENSG00000213185	chr10:124615302-124639001	-0.350302
GCN1L1	ENSG00000089154	chr12:120569137-120569730	-0.280631
LIPE-AS1	ENSG00000213904	chr19:42901376-42912410	0.25257
CMIP	ENSG00000153815	chr16:81737690-81740619	0.485299
MAP2K6	ENSG00000108984	chr17:67411141-67501921	-0.463494
ILKAP	ENSG00000132323	chr2:239102972-239103446	-0.20626
FAM179B	ENSG00000198718	chr14:45515906-45516104	0.295999
CCNT2	ENSG00000082258	chr2:135677461-135694411	-0.444923
SPG20	ENSG00000133104	chr13:36909969-36910424	0.33131
CYB5D2	ENSG00000167740	chr17:4047299-4053185	0.302196
DESI2	ENSG00000121644	chr1:244816657-244849899	-0.396802
TUBB3	ENSG00000258947	chr16:89989866-89998979	-0.305286
RP4-583P15.10	ENSG00000229299	chr20:62377028-62377176	0.403056
JADE2	ENSG00000043143	chr5:133871605-133873679	-0.287102
SPIN1	ENSG00000106723	chr9:91003453-91041297	-0.443348
DLGAP1-AS1	ENSG00000177337	chr18:3596806-3596807	-0.271194
SLC25A36	ENSG00000114120	chr3:140682069-140689769	-0.506547
TRAPPC10	ENSG00000160218	chr21:45514615-45518238	0.265632
SUV420H1	ENSG00000110066	chr11:67942650-67947599	-0.206755
ELK3	ENSG00000111145	chr12:96591920-96617343	-0.335752
TROVE2	ENSG00000116747	chr1:193039749-193044950	0.311517
LINC01123	ENSG00000204588	chr2:110751396-110751978	0.373459
FBXO38	ENSG00000145868	chr5:147807510-147812987	0.40752
STAG2	ENSG00000101972	chrX:123224614-123227868	-0.359658
FAM189B	ENSG00000160767	chr1:155220612-155220886	-0.420004
PROSER1	ENSG00000120685	chr13:39586370-39586828	-0.431892
FCF1	ENSG00000119616	chr14:75180255-75181575	-0.319825
NDEL1	ENSG00000166579	chr17:8339363-8347245	0.282594
ORMDL1	ENSG00000128699	chr2:190647739-190647740	-0.306024
SRRM2	ENSG00000167978	chr16:2802847-2806335	-0.230374
ZNF532	ENSG00000074657	chr18:56587865-56601665	-0.422216
TBC1D10A	ENSG00000099992	chr22:30688840-30689640	-0.338834
HZGJ	ENSG00000273398	chr2:68415822-68444224	-0.267084
GPX2	ENSG00000176153	chr14:65406916-65409223	-0.207939
ZNF544	ENSG00000198131	chr19:58758160-58772217	-0.250449
ZNF211	ENSG00000121417	chr19:58146123-58152072	-0.316188
C1D	ENSG00000197223	chr2:68274451-68280193	0.360609
BCLAF1	ENSG00000029363	chr6:136594325-136596670	-0.354182
MTCL1	ENSG00000168502	chr18:8706711-8718422	-0.313741
SLC29A1	ENSG00000112759	chr6:44200165-44200544	-0.35202
VAPA	ENSG00000101558	chr18:9937063-9944921	0.269273
TMEM256-PLSCR3	ENSG00000187838	chr17:7296271-7296463	-0.275345
MOAP1	ENSG00000165943	chr14:93651058-93651155	-0.348627
KLC1	ENSG00000126214	chr14:104151373-104151975	0.204643
TPST1	ENSG00000169902	chr7:65821858-65824882	0.253789
CNTNAP3	ENSG00000106714	chr9:39078917-39085733	-0.391827
PTAR1	ENSG00000188647	chr9:72338546-72347055	-0.46351
TRAPPC10	ENSG00000160218	chr21:45479095-45483419	-0.211911
SLC25A37	ENSG00000147454	chr8:23386725-23389198	0.371053
CPT2	ENSG00000157184	chr1:53678488-53678936	0.542773
SPIN3	ENSG00000204271	chrX:57010911-57021156	-0.464999
UBTF	ENSG00000108312	chr17:42288315-42288407	-0.341904
RWDD3	ENSG00000122481	chr1:95710254-95712098	-0.356307
PROSER2	ENSG00000148426	chr10:11892207-11893996	0.732277
CNOT2	ENSG00000111596	chr12:70672054-70704675	-0.410906
REV3L	ENSG00000009413	chr6:111685181-111686468	-0.557961
SPECC1	ENSG00000128487	chr17:20059549-20130726	0.408034
EFNA3	ENSG00000143590	chr1:155057880-155058353	0.232783
SSFA2	ENSG00000138434	chr2:182774698-182775853	0.586222
RPL7L1	ENSG00000146223	chr6:42854844-42854845	-0.37836
CREB1	ENSG00000118260	chr2:208425884-208432187	0.330258
POLG2	ENSG00000256525	chr17:62489138-62492525	-0.569579
MTRF1L	ENSG00000112031	chr6:153316454-153319685	-0.307243
SRRM1	ENSG00000133226	chr1:24973280-24975350	-0.538637
PUM2	ENSG00000055917	chr2:20527139-20550358	-0.407416
MED13	ENSG00000108510	chr17:60060475-60061532	-0.387803
CEP55	ENSG00000138180	chr10:95263145-95266745	-0.283479
CDK16	ENSG00000102225	chrX:47078063-47081660	0.422876
PDE8A	ENSG00000073417	chr15:85661070-85664028	-0.561697
ATP5E	ENSG00000124172	chr20:57601524-57603862	0.393873
IL4R	ENSG00000077238	chr16:27370315-27372087	-0.52071
ZSWIM8	ENSG00000214655	chr10:75559248-75559769	-0.498549
MARK2	ENSG00000072518	chr11:63672515-63673560	0.240045
CREBBP	ENSG00000005339	chr16:3819354-3820571	-0.397599
QTRTD1	ENSG00000151576	chr3:113775711-113784084	-0.463657
SNHG17	ENSG00000196756	chr20:37063269-37063840	-0.285963
SETD2	ENSG00000181555	chr3:47122573-47125210	0.36234
AP006621.5	ENSG00000255284	chr11:783671-784024	0.28931
AC007773.2	ENSG00000267213	chr19:32882092-32890657	-0.225324
UBE2Q2	ENSG00000140367	chr15:76171529-76173731	0.372636
COX20	ENSG00000203667	chr1:245005360-245005497	-0.285557
NR2C1	ENSG00000120798	chr12:95451654-95452086	0.206354
MFHAS1	ENSG00000147324	chr8:8643565-8654875	-0.639301
FNIP1	ENSG00000217128	chr5:131044965-131052258	0.483753
AMBRA1	ENSG00000110497	chr11:46570050-46615378	-0.563272
BAIAP2L2	ENSG00000128298	chr22:38483271-38493039	0.607581
ZNF451	ENSG00000112200	chr6:57015660-57017019	-0.368055
ITGB4	ENSG00000132470	chr17:73738842-73739794	-0.303513
LAMA5	ENSG00000130702	chr20:60928307-60937456	-0.327902
IMP4	ENSG00000136718	chr2:131100658-131100659	0.297132
COL27A1	ENSG00000196739	chr9:116980490-116982071	0.467195
SNRPA	ENSG00000077312	chr19:41257113-41257114	-0.383022
TBRG4	ENSG00000136270	chr7:45143042-45143698	-0.301245
TNKS2	ENSG00000107854	chr10:93558646-93572740	-0.32813
SNHG12	ENSG00000197989	chr1:28906099-28906195	0.435137
MIDN	ENSG00000167470	chr19:1251900-1254166	-0.285159
MEF2D	ENSG00000116604	chr1:156453222-156469224	0.546673
C2orf76	ENSG00000186132	chr2:120097547-120124366	-0.342849
TRAPPC10	ENSG00000160218	chr21:45504144-45506683	-0.507192
ZCCHC14	ENSG00000140948	chr16:87454322-87457416	-0.331532
ZFPM2-AS1	ENSG00000251003	chr8:106939945-107072609	-0.418717
PIP5K1A	ENSG00000143398	chr1:151171557-151196724	-0.287211
TBC1D8	ENSG00000204634	chr2:101648847-101650006	-0.313515
GPBP1	ENSG00000062194	chr5:56531859-56542127	-0.508663
CWF19L1	ENSG00000095485	chr10:102021820-102027328	-0.574699
EPC2	ENSG00000135999	chr2:149447942-149501191	-0.490241
IL4R	ENSG00000077238	chr16:27364017-27367129	-0.511319
SUPV3L1	ENSG00000156502	chr10:70940318-70945743	-0.426316
PRKCQ-AS1	ENSG00000237943	chr10:6625990-6625991	-0.405572
ZSCAN32	ENSG00000140987	chr16:3433711-3434459	0.448366
FAM104A	ENSG00000133193	chr17:71205907-71223304	-0.336355
TLN1	ENSG00000137076	chr9:35725724-35732072	-0.369682
UBAP2L	ENSG00000143569	chr1:154241888-154242676	-0.23887
TNRC6A	ENSG00000090905	chr16:24815640-24816335	-0.314985
GCN1L1	ENSG00000089154	chr12:120616753-120621372	-0.549214
CMIP	ENSG00000153815	chr16:81737690-81739104	-0.45736
CLINT1	ENSG00000113282	chr5:157216521-157218711	-0.381903
PCYT2	ENSG00000185813	chr17:79867478-79869143	-0.89848
KIAA0391	ENSG00000258790	chr14:35747924-35777200	-0.557045
HIP1R	ENSG00000130787	chr12:123320190-123332578	-0.457925
ZC3H11A	ENSG00000058673	chr1:203765624-203770703	-0.387658
MAP2K3	ENSG00000034152	chr17:21188281-21201725	-0.318131
TTC33	ENSG00000113638	chr5:40747121-40755926	-0.504273
USP10	ENSG00000103194	chr16:84767109-84773915	-0.357129
YTHDF1	ENSG00000149658	chr20:61828086-61845216	0.391253
ATMIN	ENSG00000166454	chr16:81069811-81074961	-0.520762
CREB1	ENSG00000118260	chr2:208440178-208442229	-0.566284
ANKRD17	ENSG00000132466	chr4:74027065-74043097	-0.431768
CAPN15	ENSG00000103326	chr16:586142-596817	-0.330795
CHAC2	ENSG00000143942	chr2:53999079-54001279	-0.396266
CC2D2A	ENSG00000048342	chr4:15482451-15482821	0.459471
UBAP2L	ENSG00000143569	chr1:154214041-154215693	-0.421317
LRP6	ENSG00000070018	chr12:12272264-12272265	-0.397532
PHLDB2	ENSG00000144824	chr3:111639266-111658322	-0.277631
PDDC1	ENSG00000177225	chr11:771104-771333	-0.413486
NISCH	ENSG00000010322	chr3:52504923-52505830	-0.491146
RBM10	ENSG00000182872	chrX:47038894-47039279	-0.353009
GCN1L1	ENSG00000089154	chr12:120585076-120585971	-0.274053
SETD8	ENSG00000183955	chr12:123868755-123873980	-0.403294
SREK1	ENSG00000153914	chr5:65449424-65451893	0.47367
UBE3B	ENSG00000151148	chr12:109945540-109947401	-0.368067
PAPD4	ENSG00000164329	chr5:78908898-78915435	-0.34578
RP11-864I4.1	ENSG00000255508	chr11:62356693-62358876	-0.460952
SH3BP1	ENSG00000100092	chr22:38044442-38046159	-0.344761
SIK3	ENSG00000160584	chr11:116729415-116729981	-0.214044
ZNF84	ENSG00000198040	chr12:133625434-133633540	-0.342781
PAXBP1	ENSG00000159086	chr21:34123529-34127524	-0.470782
TRAFD1	ENSG00000135148	chr12:112563422-112568315	-0.321488
CUL3	ENSG00000036257	chr2:225400358-225422376	-0.304073
PYGO2	ENSG00000163348	chr1:154933502-154935995	0.748586
RP11-347C12.1	ENSG00000198064	chr16:30246900-30251432	-0.346231
STX16	ENSG00000124222	chr20:57227143-57242546	-0.490254
UNKL	ENSG00000059145	chr16:1414256-1414257	-0.349075
INPP5B	ENSG00000204084	chr1:38341388-38345757	0.401747
MADD	ENSG00000110514	chr11:47336878-47345222	-0.314226
NEMF	ENSG00000165525	chr14:50251722-50251810	-0.30001
KIFC1	ENSG00000237649	chr6:33359774-33365806	-0.291464
NINL	ENSG00000101004	chr20:25490425-25491310	0.341344
TAF2	ENSG00000064313	chr8:120818641-120831586	-0.426571
PDE7A	ENSG00000205268	chr8:66693182-66695018	0.526013
CTD-2020K17.3	ENSG00000233175	chr17:43317971-43318478	-0.497542
ST3GAL5	ENSG00000115525	chr2:86073686-86074984	-0.379685
MIOS	ENSG00000164654	chr7:7613827-7622749	-0.602794
PALLD	ENSG00000129116	chr4:169753322-169812073	0.642061
PIGA	ENSG00000165195	chrX:15344168-15349338	-0.416398
ATP5E	ENSG00000124172	chr20:57601524-57603862	0.459361
DHX30	ENSG00000132153	chr3:47852201-47857453	0.287915
KIF23	ENSG00000137807	chr15:69732826-69733107	0.624621
PVT1	ENSG00000249859	chr8:128806980-128902835	-0.394299
FAM219B	ENSG00000178761	chr15:75192478-75192479	-0.25532
ENSG00000233137	ENSG00000233137	chr9:37084289-37086665	0.390449
ACTN1	ENSG00000072110	chr14:69343957-69345175	0.393386
HAUS2	ENSG00000137814	chr15:42851606-42853468	-0.382792
GS1-259H13.10	ENSG00000272647	chr7:99158318-99159991	-0.411068
MTRF1L	ENSG00000112031	chr6:153316454-153319685	-0.306631
PPM1B	ENSG00000138032	chr2:44445676-44459455	-0.305193
LZTS2	ENSG00000107816	chr10:102763923-102765215	-0.46578
ARPP19	ENSG00000128989	chr15:52861099-52861313	-0.326324
DOCK7	ENSG00000116641	chr1:62943505-62954605	-0.391517
XPC	ENSG00000154767	chr3:14193916-14197835	-0.380656
MTF2	ENSG00000143033	chr1:93545088-93575787	-0.49908
SSFA2	ENSG00000138434	chr2:182767193-182774626	-0.401739
ASNS	ENSG00000070669	chr7:97501308-97501663	0.248133
VEZF1	ENSG00000136451	chr17:56052261-56056513	-0.411226
SETD5	ENSG00000168137	chr3:9471735-9475054	0.441176
KDM3B	ENSG00000120733	chr5:137722310-137726702	-0.390496
NCOA7	ENSG00000111912	chr6:126221167-126236479	-0.531807
MPHOSPH9	ENSG00000051825	chr12:123707674-123714808	0.347794
RGS20	ENSG00000147509	chr8:54793644-54826057	0.301873
WDR19	ENSG00000157796	chr4:39274681-39274794	0.607518
ZSWIM8	ENSG00000214655	chr10:75550934-75551617	0.430754
FMR1	ENSG00000102081	chrX:146993748-147003451	-0.386954
HERC4	ENSG00000148634	chr10:69716733-69726440	-0.454788
DAGLB	ENSG00000164535	chr7:6472590-6474393	-0.423987
MORF4L2	ENSG00000123562	chrX:102939657-102940099	0.31088
PAIP1	ENSG00000172239	chr5:43527571-43529888	-0.541014
RPRD2	ENSG00000163125	chr1:150444218-150444219	-0.554935
GZF1	ENSG00000125812	chr20:23350378-23350728	-0.462232
CLIP1	ENSG00000130779	chr12:122803895-122812494	-0.282364
ARHGAP12	ENSG00000165322	chr10:32141525-32150323	-0.371388
SPACA6P	ENSG00000182310	chr19:52205905-52206274	-0.246488
DOCK7	ENSG00000116641	chr1:62943505-62954605	-0.354412
ZNF211	ENSG00000121417	chr19:58146123-58152072	-0.372444
SEC16A	ENSG00000148396	chr9:139359014-139360414	-0.338883
NCOA5	ENSG00000124160	chr20:44708092-44718456	-0.415407
VHL	ENSG00000134086	chr3:10184705-10188198	-0.437747
BICC1	ENSG00000122870	chr10:60580228-60582986	0.395358
RCOR3	ENSG00000117625	chr1:211477482-211485697	0.482386
RANGRF	ENSG00000108961	chr17:8192906-8193131	-0.284212
ITGA2B	ENSG00000005961	chr17:42457182-42457614	0.627412
RPRD1A	ENSG00000141425	chr18:33573002-33573003	-0.320063
FBXO21	ENSG00000135108	chr12:117615446-117624282	-0.435506
NUDT22	ENSG00000149761	chr11:63995138-63996719	-0.28272
FLCN	ENSG00000154803	chr17:17119817-17120383	-0.625873
REPIN1	ENSG00000214022	chr7:150067973-150068317	0.290412
FAM192A	ENSG00000172775	chr16:57212764-57215466	0.471062
RHOT1	ENSG00000126858	chr17:30506666-30509776	0.429577
CLASP1	ENSG00000074054	chr2:122165291-122166600	0.337503
ENSG00000185020	ENSG00000185020	chr9:40332659-40332891	-0.455133
MRPL22	ENSG00000082515	chr5:154320825-154330381	-0.324151
PIKFYVE	ENSG00000115020	chr2:209167077-209168895	-0.33815
NCK1	ENSG00000158092	chr3:136647069-136664425	-0.369714
ZCCHC14	ENSG00000140948	chr16:87440620-87441284	0.369586
AMBRA1	ENSG00000110497	chr11:46439602-46455024	-0.316139
TMEM145	ENSG00000167619	chr19:42824589-42827735	-0.370887
HEATR5B	ENSG00000008869	chr2:37306474-37310432	-0.313849
LMTK2	ENSG00000164715	chr7:97833018-97833256	-0.520185
THRAP3	ENSG00000054118	chr1:36759536-36762184	-0.390698
CDRT1	ENSG00000241322	chr17:15496809-15498062	-0.308891
RP4-583P15.10	ENSG00000229299	chr20:62377028-62377176	0.422867
APPBP2	ENSG00000062725	chr17:58531853-58533657	-0.393437
GCC2	ENSG00000135968	chr2:109089355-109091991	-0.369501
NPAS2	ENSG00000170485	chr2:101609989-101611862	-0.282188
DDX50	ENSG00000107625	chr10:70661227-70666467	-0.508231
SMPD4	ENSG00000136699	chr2:130930927-130931087	-0.306255
SEMA4B	ENSG00000185033	chr15:90766972-90767070	-0.420581
SLC27A3	ENSG00000143554	chr1:153750361-153750637	-0.353068
TCERG1	ENSG00000113649	chr5:145878249-145882938	-0.288774
STRN3	ENSG00000196792	chr14:31382863-31404369	-0.413918
GSDMB	ENSG00000073605	chr17:38065295-38066009	0.378078
MANBA	ENSG00000109323	chr4:103592168-103592438	0.609091
YJEFN3	ENSG00000250067	chr19:19638579-19640173	-0.534063
INPP5B	ENSG00000204084	chr1:38343995-38345757	-0.558301
DAPK3	ENSG00000167657	chr19:3961159-3963641	-0.39762
AEN	ENSG00000181026	chr15:89165028-89169377	0.373005
EFR3A	ENSG00000132294	chr8:133008744-133014006	-0.319165
USP34	ENSG00000115464	chr2:61539045-61541720	-0.339383
CDK11A	ENSG00000008128	chr1:1636094-1636343	-0.476968
SREBF1	ENSG00000072310	chr17:17715370-17716682	-0.548083
RASSF2	ENSG00000101265	chr20:4781708-4802975	-0.337472
CHD9	ENSG00000177200	chr16:53352252-53355438	-0.333619
CHD1	ENSG00000153922	chr5:98204981-98205458	0.404145
TRA2B	ENSG00000136527	chr3:185644522-185655613	-0.298905
MANBA	ENSG00000109323	chr4:103595227-103610731	-0.671554
ZNF251	ENSG00000198169	chr8:145948767-145979068	-0.26347
ZNF746	ENSG00000181220	chr7:149191594-149194604	-0.769041
ATL2	ENSG00000119787	chr2:38570654-38604285	-0.341502
SFPQ	ENSG00000116560	chr1:35643637-35646736	0.40658
IQCJ-SCHIP1	ENSG00000250588	chr3:159482927-159583952	-0.456115
PER2	ENSG00000132326	chr2:239176839-239177564	-0.498427
UBR5	ENSG00000104517	chr8:103269945-103271213	-0.652118
NCOA7	ENSG00000111912	chr6:126234839-126236479	0.461688
MTCL1	ENSG00000168502	chr18:8813231-8818961	-0.32948
FAM189B	ENSG00000160767	chr1:155218264-155220067	-0.36608
SSFA2	ENSG00000138434	chr2:182781154-182783325	-0.42928
RASA2	ENSG00000155903	chr3:141304940-141305488	-0.630565
EBP	ENSG00000147155	chrX:48380295-48382142	0.23599
CHD3	ENSG00000170004	chr17:7812656-7813746	-0.313252
PEX1	ENSG00000127980	chr7:92122443-92123607	-0.320363
FLCN	ENSG00000154803	chr17:17118630-17120383	0.672864
UBE3B	ENSG00000151148	chr12:109945540-109947401	-0.461609
SULT1A4	ENSG00000213648	chr16:29469336-29472703	-0.27596
LINC01021	ENSG00000250337	chr5:27494442-27496056	0.289359
ADGRE5	ENSG00000123146	chr19:14501891-14508470	-0.339584
POGZ	ENSG00000143442	chr1:151381057-151381170	-0.470329
NUP50	ENSG00000093000	chr22:45564127-45566869	0.566893
TUT1	ENSG00000149016	chr11:62356693-62358876	-0.444731
COPS3	ENSG00000141030	chr17:17179478-17184446	-0.429234
DCAF7	ENSG00000136485	chr17:61666599-61666600	-0.371316
MGME1	ENSG00000125871	chr20:17951013-17956327	-0.434248
FAM214A	ENSG00000047346	chr15:52877141-52879348	-0.285365
GCA	ENSG00000115271	chr2:163200785-163204088	-0.765458
C17orf85	ENSG00000074356	chr17:3715948-3715949	-0.300609
PCID2	ENSG00000126226	chr13:113832487-113832488	-0.3326
SLC25A37	ENSG00000147454	chr8:23424112-23424113	-0.278894
BAZ2B	ENSG00000123636	chr2:160287667-160289268	0.571116
GTPBP1	ENSG00000100226	chr22:39102152-39104850	-0.214806
TAF1	ENSG00000147133	chrX:70586344-70586917	0.355798
TCERG1	ENSG00000113649	chr5:145859657-145862155	-0.442833
GEN1	ENSG00000178295	chr2:17950078-17952263	0.387205
FNBP4	ENSG00000109920	chr11:47753771-47754089	0.300867
TCF7L2	ENSG00000148737	chr10:114711366-114799784	-0.388857
DTX3	ENSG00000178498	chr12:57998641-57999354	-0.352443
FAM208B	ENSG00000108021	chr10:5800955-5801758	0.489766
TNFAIP3	ENSG00000118503	chr6:138196172-138196973	-0.350165
SIK3	ENSG00000160584	chr11:116715966-116716106	0.272249
ZBTB38	ENSG00000177311	chr3:141105779-141115101	-0.458218
MTFR2	ENSG00000146410	chr6:136560958-136562582	-0.333577
COL27A1	ENSG00000196739	chr9:116997932-116999942	0.302237
KAT5	ENSG00000172977	chr11:65480529-65481064	0.225262
BRWD1	ENSG00000185658	chr21:40676536-40684767	0.361705
TMEM256-PLSCR3	ENSG00000187838	chr17:7296828-7297423	0.232792
WAC	ENSG00000095787	chr10:28899750-28900703	-0.412671
SIRT1	ENSG00000096717	chr10:69651312-69666547	-0.529042
NFS1	ENSG00000244005	chr20:34286512-34287114	-0.309328
MIS18BP1	ENSG00000129534	chr14:45721968-45722238	0.490684
MARK2	ENSG00000072518	chr11:63675776-63676349	-0.38006
ZC3H18	ENSG00000158545	chr16:88653092-88664586	-0.414683
TECR	ENSG00000099797	chr19:14675935-14676014	-0.351224
BBIP1	ENSG00000214413	chr10:112660284-112660784	0.42113
GRB10	ENSG00000106070	chr7:50742355-50771518	-0.316144
TNRC18	ENSG00000182095	chr7:5348580-5352134	0.351253
RP11-45M22.4	ENSG00000264187	chr17:17119817-17120383	-0.625145
KAT5	ENSG00000172977	chr11:65480529-65481064	0.242732
CREBBP	ENSG00000005339	chr16:3820987-3823752	-0.48185
FAM171B	ENSG00000144369	chr2:187611977-187613055	0.839104
HEATR5B	ENSG00000008869	chr2:37306474-37310432	-0.431718
LINC01184	ENSG00000245937	chr5:127396936-127418662	0.273199
BET1L	ENSG00000177951	chr11:205469-205611	-0.47876
PDZD8	ENSG00000165650	chr10:119044982-119049697	-0.313158
LUCAT1	ENSG00000248323	chr5:90608312-90608895	0.284565
SETD5	ENSG00000168137	chr3:9477590-9482140	-0.333019
SEC61A1	ENSG00000058262	chr3:127783781-127783864	-0.306212
CCDC14	ENSG00000175455	chr3:123634565-123649949	-0.312869
REEP4	ENSG00000168476	chr8:21996306-21996439	-0.370227
GORAB	ENSG00000120370	chr1:170509806-170511632	0.290674
PEX1	ENSG00000127980	chr7:92132509-92135562	0.352577
LRRFIP2	ENSG00000093167	chr3:37107433-37116515	-0.382873
RP11-443P15.2	ENSG00000171658	chr3:185693145-185697447	-0.582495
TLE4	ENSG00000106829	chr9:82322133-82323033	0.303127
RAB11FIP3	ENSG00000090565	chr16:539000-541134	0.288694
KDM6B	ENSG00000132510	chr17:7755114-7755269	-0.294075
APPBP2	ENSG00000062725	chr17:58543820-58556509	-0.389315
MTHFD2L	ENSG00000163738	chr4:75025805-75027497	0.386253
RGL2	ENSG00000237441	chr6:33261843-33262754	0.337348
TNRC6A	ENSG00000090905	chr16:24803138-24805865	-0.39904
FADS3	ENSG00000221968	chr11:61644337-61644338	-0.263918
FAM175A	ENSG00000163322	chr4:84403397-84406139	-0.586267
KIAA1217	ENSG00000120549	chr10:24834032-24834756	0.513189
KLF7	ENSG00000118263	chr2:208013924-208030191	0.546114
VDAC2	ENSG00000165637	chr10:76982160-76984122	0.574731
AP3D1	ENSG00000065000	chr19:2113412-2114124	-0.463198
KDM6B	ENSG00000132510	chr17:7754867-7754966	-0.259556
TRIM11	ENSG00000154370	chr1:228584866-228588665	-0.381725
STAG2	ENSG00000101972	chrX:123095706-123156381	-0.351595
TCERG1	ENSG00000113649	chr5:145879534-145882938	0.321471
BRD7	ENSG00000166164	chr16:50352940-50352941	-0.311386
PHACTR4	ENSG00000204138	chr1:28764941-28784343	0.405642
BCL6	ENSG00000113916	chr3:187452695-187463198	-0.246223
PRPF39	ENSG00000185246	chr14:45578983-45579097	-0.472787
DGKZ	ENSG00000149091	chr11:46391100-46391491	-0.317913
WNK1	ENSG00000060237	chr12:987527-989887	-0.293783
NFAT5	ENSG00000102908	chr16:69726906-69727989	0.322547
WDR35	ENSG00000118965	chr2:20175424-20178512	-0.449971
USPL1	ENSG00000132952	chr13:31205611-31211881	-0.484972
RBSN	ENSG00000131381	chr3:15116437-15117113	-0.396491
GABPB1	ENSG00000104064	chr15:50601995-50647182	-0.500991
TXLNGY	ENSG00000131002	chrY:21759551-21760438	0.51037
STX1A	ENSG00000106089	chr7:73119554-73122919	-0.282949
ZNF274	ENSG00000171606	chr19:58721439-58722926	-0.407591
PDE8A	ENSG00000073417	chr15:85661070-85663705	0.524381
IQCB1	ENSG00000173226	chr3:121500721-121507131	0.379378
ENSG00000182319	ENSG00000182319	chr8:8197151-8233763	-0.35017
LRP6	ENSG00000070018	chr12:12272264-12273304	0.296205
SMN2	ENSG00000205571	chr5:69363273-69365062	-0.367808
PRPF39	ENSG00000185246	chr14:45578983-45579297	0.408292
MLK4	ENSG00000143674	chr1:233508528-233511662	0.590702
SETX	ENSG00000107290	chr9:135187243-135202340	0.415579
FBXO22	ENSG00000167196	chr15:76196444-76196832	-0.273015
DDX3Y	ENSG00000067048	chrY:15026561-15026979	0.31053
KMT2E	ENSG00000005483	chr7:104654982-104681286	-0.410585
SIK3	ENSG00000160584	chr11:116734534-116738662	-0.315462
RB1CC1	ENSG00000023287	chr8:53598080-53599413	-0.396528
NADSYN1	ENSG00000172890	chr11:71171259-71171768	-0.450862
SPATA5L1	ENSG00000171763	chr15:45697703-45702570	-0.744249
LINC00894	ENSG00000235703	chrX:149114246-149115392	0.401719
HKDC1	ENSG00000156510	chr10:71021050-71025341	-0.306034
C6orf141	ENSG00000197261	chr6:49519003-49519004	-0.405038
FUBP1	ENSG00000162613	chr1:78413137-78413138	-0.296574
NUP50	ENSG00000093000	chr22:45571961-45574119	-0.420972
MTMR14	ENSG00000163719	chr3:9691426-9695305	-0.47161
ENSG00000155984	ENSG00000155984	chrX:148685736-148690314	-0.354
HMGN4	ENSG00000182952	chr6:26538729-26545355	-0.460907
ERI2	ENSG00000196678	chr16:20809533-20810585	0.529466
PTPN6	ENSG00000111679	chr12:7067236-7069090	-0.322962
TTF2	ENSG00000116830	chr1:117640055-117640828	0.345626
PREB	ENSG00000138073	chr2:27354699-27354878	-0.310571
PTGES3	ENSG00000110958	chr12:57058584-57059988	-0.575857
VEZF1	ENSG00000136451	chr17:56052261-56056513	-0.474139
DGKE	ENSG00000153933	chr17:54925426-54926057	0.387935
POMT2	ENSG00000009830	chr14:77757723-77762507	-0.306771
RICTOR	ENSG00000164327	chr5:38964994-38966743	-0.457016
ST3GAL5	ENSG00000115525	chr2:86075327-86088304	-0.509226
E2F3	ENSG00000112242	chr6:20404063-20480077	-0.454333
SETDB1	ENSG00000143379	chr1:150922001-150922934	-0.326345
RSPRY1	ENSG00000159579	chr16:57220363-57238416	-0.37755
NEAT1	ENSG00000245532	chr11:65191097-65191098	-0.28268
SUCO	ENSG00000094975	chr1:172571927-172577887	-0.292873
SREBF1	ENSG00000072310	chr17:17716165-17716682	-0.281972
AGER	ENSG00000204305	chr6:32149016-32149301	0.228894
ARL14EP	ENSG00000152219	chr11:30344749-30352433	-0.333662
TBC1D10B	ENSG00000169221	chr16:30370138-30370493	-0.470371
ADCY3	ENSG00000138031	chr2:25043320-25043593	0.316003
SMAD6	ENSG00000137834	chr15:67001076-67004006	0.233229
POGZ	ENSG00000143442	chr1:151380716-151380885	-0.479328
NMRK1	ENSG00000106733	chr9:77684958-77692075	-0.325783
MTCL1	ENSG00000168502	chr18:8807058-8809446	-0.22742
CAMLG	ENSG00000164615	chr5:134079742-134086449	-0.305143
USP42	ENSG00000106346	chr7:6180615-6182563	-0.637211
SP110	ENSG00000135899	chr2:231041440-231042254	-0.688961
GTPBP1	ENSG00000100226	chr22:39104961-39111912	-0.361276
CSNK1E	ENSG00000213923	chr22:38687944-38689261	-0.323422
RPRD1B	ENSG00000101413	chr20:36694658-36718128	-0.7022
ZNF71	ENSG00000197951	chr19:57112959-57132636	-0.706173
ENTHD2	ENSG00000167302	chr17:79206318-79207232	-0.22888
LBHD1	ENSG00000162194	chr11:62435219-62437113	-0.447553
SSFA2	ENSG00000138434	chr2:182767193-182774626	-0.37045
ZSWIM8	ENSG00000214655	chr10:75550934-75551082	-0.402306
GRB7	ENSG00000141738	chr17:37902041-37902362	0.240176
MSH5	ENSG00000204410	chr6:31712358-31713014	0.233853
CARKD	ENSG00000213995	chr13:111276626-111277537	-0.515178
AHCTF1	ENSG00000153207	chr1:247027418-247030546	-0.606804
JAG2	ENSG00000184916	chr14:105609975-105612722	0.298976
ERVK3-1	ENSG00000142396	chr19:58817582-58823387	0.417829
LMTK2	ENSG00000164715	chr7:97833498-97834776	-0.512914
PDXDC1	ENSG00000179889	chr16:15129410-15129873	-0.345047
DDX51	ENSG00000185163	chr12:132627423-132628240	-0.359048
BCL2L11	ENSG00000153094	chr2:111881446-111881627	0.531453
HSF2	ENSG00000025156	chr6:122744831-122752575	-0.437243
CUL9	ENSG00000112659	chr6:43190634-43191002	-0.451246
ENSG00000132142	ENSG00000132142	chr17:35685925-35687113	0.342036
SETD5	ENSG00000168137	chr3:9475246-9475529	0.479738
TBC1D23	ENSG00000036054	chr3:100009545-100013931	-0.346562
IL11RA	ENSG00000137070	chr9:34655314-34655602	0.217809
UBR5	ENSG00000104517	chr8:103269945-103270544	0.637466
ZNF274	ENSG00000171606	chr19:58697205-58698314	-0.359083
NFAT5	ENSG00000102908	chr16:69727988-69727989	-0.361736
AMMECR1L	ENSG00000144233	chr2:128622779-128624474	-0.317581
ZMIZ1	ENSG00000108175	chr10:81058948-81060489	-0.340219
THAP9-AS1	ENSG00000251022	chr4:83816927-83819142	0.305634
TCF20	ENSG00000100207	chr22:42564742-42565853	0.391527
LHFPL2	ENSG00000145685	chr5:77806221-77860636	-0.536861
PIP5K1A	ENSG00000143398	chr1:151196755-151199796	-0.34392
ERRFI1	ENSG00000116285	chr1:8075752-8086218	-0.532196
GSTM4	ENSG00000168765	chr1:110201732-110207633	-0.247328
TXLNGY	ENSG00000131002	chrY:21759551-21761625	-0.40396
PCID2	ENSG00000126226	chr13:113832322-113832323	-0.276226
NIPBL	ENSG00000164190	chr5:37027514-37036481	-0.34912
PNRC1	ENSG00000146278	chr6:89792454-89793472	0.488847
FBXO18	ENSG00000134452	chr10:5932309-5944983	-0.396551
USPL1	ENSG00000132952	chr13:31196029-31204972	-0.353073
CNTNAP3B	ENSG00000154529	chr9:43908523-43915826	0.393637
ERVK3-1	ENSG00000142396	chr19:58823427-58823428	-0.659521
SIK3	ENSG00000160584	chr11:116715966-116715967	-0.390336
SCD	ENSG00000099194	chr10:102116521-102120491	-0.49366
ZIC5	ENSG00000139800	chr13:100622183-100622381	-0.363952
MANBA	ENSG00000109323	chr4:103586009-103590120	-0.378901
TROVE2	ENSG00000116747	chr1:193029352-193038164	0.480592
FBXL2	ENSG00000153558	chr3:33339217-33400459	0.309508
PAXIP1	ENSG00000157212	chr7:154760836-154767406	-0.378251
ANKRD10	ENSG00000088448	chr13:111546549-111558380	-0.373547
CYB561D2	ENSG00000114395	chr3:50388415-50388840	0.37014
NAB1	ENSG00000138386	chr2:191514708-191518453	0.36712
CREB1	ENSG00000118260	chr2:208425096-208425843	0.320514
CARD8	ENSG00000105483	chr19:48744320-48752780	-0.245157
CNTNAP3	ENSG00000106714	chr9:39078453-39085733	0.455974
FAM136A	ENSG00000035141	chr2:70528539-70528540	-0.419587
CUL9	ENSG00000112659	chr6:43171725-43172098	-0.408398
ZFP62	ENSG00000196670	chr5:180275082-180275083	-0.260636
LRRC28	ENSG00000168904	chr15:99816821-99827462	-0.243507
FAM45A	ENSG00000119979	chr10:120863709-120864276	0.232451
PHF14	ENSG00000106443	chr7:11151094-11209043	-0.387398
PTPN6	ENSG00000111679	chr12:7060518-7060519	0.34347
CXCL2	ENSG00000081041	chr4:74964401-74964516	0.220438
CPEB4	ENSG00000113742	chr5:173337607-173371970	-0.328096
SLC25A44	ENSG00000160785	chr1:156164038-156169626	-0.498865
SNX4	ENSG00000114520	chr3:125188363-125195539	-0.547108
MANBA	ENSG00000109323	chr4:103647840-103681875	-0.325881
CREB1	ENSG00000118260	chr2:208440178-208442229	-0.403053
ETV5	ENSG00000244405	chr3:185798964-185823094	-0.288351
ABCD4	ENSG00000119688	chr14:74766378-74766853	0.31967
LDLR	ENSG00000130164	chr19:11211021-11213340	-0.224421
CWF19L1	ENSG00000095485	chr10:102020801-102021736	-0.287807
SMC4	ENSG00000113810	chr3:160117537-160119703	0.568618
NDUFA13	ENSG00000186010	chr19:19639495-19640173	0.564992
FNDC3A	ENSG00000102531	chr13:49649500-49688791	-0.45879
BCS1L	ENSG00000074582	chr2:219524466-219525662	-0.500208
RIMKLB	ENSG00000166532	chr12:8932708-8933171	0.362067
CNOT8	ENSG00000155508	chr5:154244945-154250221	-0.290647
IDI1	ENSG00000067064	chr10:1090111-1094804	-0.214727
CDK11A	ENSG00000008128	chr1:1641079-1643703	-0.39352
DTX3	ENSG00000178498	chr12:57998641-57999127	0.396937
SIRT1	ENSG00000096717	chr10:69651312-69666547	-0.44407
CCDC14	ENSG00000175455	chr3:123665904-123666127	0.408134
AAR2	ENSG00000131043	chr20:34824959-34827743	0.332681
HNRNPUL2-BSCL2	ENSG00000234857	chr11:62474796-62482972	-0.561534
ATR	ENSG00000175054	chr3:142168444-142169308	0.440415
ATL2	ENSG00000119787	chr2:38523255-38525286	-0.528629
DAGLB	ENSG00000164535	chr7:6474651-6475993	-0.378075
SIRT7	ENSG00000187531	chr17:79875843-79875915	-0.679476
AC138969.4	ENSG00000183889	chr16:16411634-16412780	0.373818
MNX1	ENSG00000130675	chr7:156798567-156802354	0.255046
CRAMP1L	ENSG00000007545	chr16:1720810-1723882	-0.317213
TRIM11	ENSG00000154370	chr1:228584866-228589767	0.310968
TCEA2	ENSG00000171703	chr20:62694737-62697829	-0.356976
BIN1	ENSG00000136717	chr2:127808819-127816587	0.228089
CREBBP	ENSG00000005339	chr16:3832927-3843387	0.317566
YTHDF3	ENSG00000185728	chr8:64081970-64087890	-0.59038
ZNF512B	ENSG00000196700	chr20:62591492-62592662	-0.387123
SCML1	ENSG00000047634	chrX:17755800-17764138	-0.393587
TAF4	ENSG00000130699	chr20:60578330-60582603	0.31956
RP11-21J18.1	ENSG00000265257	chr18:9117901-9119472	0.433477
PAPD5	ENSG00000121274	chr16:50259196-50261750	-0.28109
AVIL	ENSG00000135407	chr12:58201372-58201373	-0.476957
CWF19L1	ENSG00000095485	chr10:102010089-102013178	-0.495269
GS1-124K5.12	ENSG00000232559	chr7:66038537-66057244	-0.380819
SVIL-AS1	ENSG00000224597	chr10:29704341-29709420	-0.31457
PALLD	ENSG00000129116	chr4:169799545-169812073	-0.343692
PDE4D	ENSG00000113448	chr5:58334798-58334799	0.36645
SAMD4B	ENSG00000179134	chr19:39839029-39844646	-0.587674
PHF2	ENSG00000197724	chr9:96421882-96422474	-0.57427
FKBP10	ENSG00000141756	chr17:39975986-39975987	-0.55974
DDX10	ENSG00000178105	chr11:108800435-108810973	-0.266145
UGCG	ENSG00000148154	chr9:114677026-114685129	-0.358547
FNBP1L	ENSG00000137942	chr1:94017965-94017966	-0.383363
SLC26A11	ENSG00000181045	chr17:78201759-78210727	-0.460826
DICER1	ENSG00000100697	chr14:95555345-95556850	0.487889
NCK2	ENSG00000071051	chr2:106498505-106509438	-0.31905
RALGAPB	ENSG00000170471	chr20:37161502-37163717	0.275396
B4GALT3	ENSG00000158850	chr1:161145864-161146224	-0.238751
BPTF	ENSG00000171634	chr17:65959622-65960328	0.211553
LA16c-431H6.6	ENSG00000261732	chr16:1720810-1723882	-0.308274
SBF2	ENSG00000133812	chr11:10024236-10049999	-0.488607
CEP164	ENSG00000110274	chr11:117279720-117280334	-0.318466
NAE1	ENSG00000159593	chr16:66860683-66864750	-0.403154
CREBBP	ENSG00000005339	chr16:3860780-3900298	-0.364171
HECTD1	ENSG00000092148	chr14:31583265-31583492	-0.309719
CCNT2	ENSG00000082258	chr2:135677461-135692198	0.419305

## Sheet: sh_hnRNPK
GeneName	GeneID	Splice Junction Coords	dPSI
PHYKPL	ENSG00000175309	chr5:177641886-177642277	-0.257112
RFX2	ENSG00000087903	chr19:6026248-6039991	-0.476763
BTBD16	ENSG00000138152	chr10:124058649-124090691	0.635299
STRADA	ENSG00000266173	chr17:61784099-61784607	-0.381122
MAPK12	ENSG00000188130	chr22:50694310-50694514	-0.200074
CDK5RAP2	ENSG00000136861	chr9:123165349-123166314	-0.130146
MSANTD3	ENSG00000066697	chr9:103189852-103204188	0.274404
FLNB	ENSG00000136068	chr3:58127656-58128377	0.251505
SYNJ2	ENSG00000078269	chr6:158450058-158451440	0.21
UBOX5	ENSG00000185019	chr20:3096112-3102030	-0.285752
ZNF283	ENSG00000167637	chr19:44332133-44332354	0.51946
PHF14	ENSG00000106443	chr7:11014572-11021999	0.225747
IQSEC2	ENSG00000124313	chrX:53296066-53310678	0.242729
LIN7B	ENSG00000104863	chr19:49618588-49619520	-0.315131
DENND4A	ENSG00000174485	chr15:65989721-65993389	0.301225
RNF167	ENSG00000108523	chr17:4844021-4844218	0.225421
FLCN	ENSG00000154803	chr17:17131475-17135108	-0.506636
VEZF1	ENSG00000136451	chr17:56060754-56065440	-0.332651
WNT3	ENSG00000108379	chr17:44846165-44847149	-0.367676
PRRT3	ENSG00000163704	chr3:9987395-9987769	0.385219
RBFOX3	ENSG00000167281	chr17:77111830-77231848	-0.328022
FBRSL1	ENSG00000112787	chr12:133084936-133102320	-0.490687
LRRC45	ENSG00000169683	chr17:79987061-79987419	-0.111008
TCOF1	ENSG00000070814	chr5:149769586-149771520	-0.249291
RBM41	ENSG00000089682	chrX:106312632-106356627	-0.297254
TMEM145	ENSG00000167619	chr19:42821115-42821861	-0.640296
MAP3K8	ENSG00000107968	chr10:30723307-30727845	-0.190081
ARHGEF40	ENSG00000165801	chr14:21555264-21555479	0.23676
ACOX1	ENSG00000161533	chr17:73953647-73969706	-0.133662
KIAA0141	ENSG00000081791	chr5:141314151-141316763	-0.266028
ABCC10	ENSG00000124574	chr6:43414184-43414986	-0.307718
B4GALT3	ENSG00000158850	chr1:161146369-161147213	-0.515732
SETD5	ENSG00000168137	chr3:9506356-9512143	-0.446524
JADE2	ENSG00000043143	chr5:133909452-133912458	-0.440118
ITGB1BP1	ENSG00000119185	chr2:9547727-9548242	-0.301599
MEF2A	ENSG00000068305	chr15:100185969-100211725	-0.43618
SIRPA	ENSG00000198053	chr20:1896101-1908521	0.510079
WDR18	ENSG00000065268	chr19:985975-986136	0.249047
ZNF740	ENSG00000139651	chr12:53581547-53582321	0.371952
SURF2	ENSG00000148291	chr9:136227310-136227932	-0.231928
RELL2	ENSG00000164620	chr5:141018254-141018362	0.329566
SLC22A18	ENSG00000110628	chr11:2937644-2937852	0.255127
RARG	ENSG00000172819	chr12:53621471-53623695	0.251731
TSSC1	ENSG00000032389	chr2:3358404-3381419	-0.191216
BSG	ENSG00000172270	chr19:571579-580379	0.411709
CASP9	ENSG00000132906	chr1:15821947-15831106	-0.442551
LARP1B	ENSG00000138709	chr4:129028468-129029038	0.113669
ARHGAP5	ENSG00000100852	chr14:32546641-32559708	-0.269069
DPP8	ENSG00000074603	chr15:65804446-65804633	0.518975
RAB4A	ENSG00000168118	chr1:229407117-229431595	0.161769
SCN9A	ENSG00000169432	chr2:167160839-167162302	-0.311256
BMS1P4	ENSG00000242338	chr10:75481262-75485719	0.621982
ANKRD13A	ENSG00000076513	chr12:110451054-110454193	-0.131412
XRN1	ENSG00000114127	chr3:142037745-142048276	-0.318344
C12orf65	ENSG00000130921	chr12:123738503-123741360	-0.227365
STAG3L5P	ENSG00000242294	chr7:99936512-99938568	0.260958
ZNF449	ENSG00000173275	chrX:134481397-134482679	-0.32041
DEAF1	ENSG00000177030	chr11:691598-693489	0.48347
EIF3F	ENSG00000175390	chr11:8013398-8013631	-0.285821
ANKRD32	ENSG00000133302	chr5:94006713-94014513	-0.228887
ADGRB2	ENSG00000121753	chr1:32198213-32198573	-0.311276
MAZ	ENSG00000103495	chr16:29820062-29820861	0.377415
SLC25A35	ENSG00000125434	chr17:8194294-8195841	-0.215231
NSD1	ENSG00000165671	chr5:176562201-176562942	-0.335818
PMS2P5	ENSG00000123965	chr7:74313951-74335467	0.339954
PCDHA4	ENSG00000204967	chr5:140189157-140196816	0.565158
PDGFA	ENSG00000197461	chr7:540136-540753	0.295202
IFT88	ENSG00000032742	chr13:21179244-21189932	-0.223234
JMJD1C	ENSG00000171988	chr10:64979743-65024411	0.281485
MFF	ENSG00000168958	chr2:228207535-228211942	-0.213326
NIPSNAP1	ENSG00000184117	chr22:29976144-29976974	0.169043
STK11	ENSG00000118046	chr19:1221339-1221948	-0.389874
DESI2	ENSG00000121644	chr1:244852644-244855181	0.285895
LIMCH1	ENSG00000064042	chr4:41621457-41640949	-0.242185
NAPA	ENSG00000105402	chr19:47991491-47991492	-0.281605
DNMT1	ENSG00000130816	chr19:10290910-10291026	0.223164
TCOF1	ENSG00000070814	chr5:149759295-149767465	-0.190864
GSK3A	ENSG00000105723	chr19:42734543-42734544	-0.3844
CERS4	ENSG00000090661	chr19:8321594-8321833	-0.307248
PHF19	ENSG00000119403	chr9:123624283-123624866	-0.227749
WAC	ENSG00000095787	chr10:28879761-28897115	-0.252177
IKBKB	ENSG00000104365	chr8:42129723-42146152	-0.226182
ENSG00000269751	ENSG00000269751	chr19:48984006-48984007	0.120893
CTD-2600O9.1	ENSG00000187185	chr16:57832544-57841515	0.247212
RHOBTB3	ENSG00000164292	chr5:95119667-95124466	-0.223241
LMF1	ENSG00000103227	chr16:921341-929570	-0.290824
THADA	ENSG00000115970	chr2:43787524-43793837	-0.3346
AGAP5	ENSG00000172650	chr10:75439864-75442452	-0.465874
SLC38A6	ENSG00000139974	chr14:61518853-61519067	0.222484
ACAD8	ENSG00000151498	chr11:134129639-134130938	-0.201292
SBF1	ENSG00000100241	chr22:50895540-50897684	0.243792
ATAT1	ENSG00000137343	chr6:30608380-30609565	0.240922
GANC	ENSG00000214013	chr15:42565809-42566366	-0.340996
EPB41L1	ENSG00000088367	chr20:34785963-34797410	0.226351
BNIP2	ENSG00000140299	chr15:59971033-59971791	0.190676
PELI3	ENSG00000174516	chr11:66236375-66238713	-0.445901
BRCC3	ENSG00000185515	chrX:154299925-154300602	-0.188284
CLN6	ENSG00000128973	chr15:68503656-68506628	0.213848
SUPT16H	ENSG00000092201	chr14:21841589-21852021	-0.227141
TRIML2	ENSG00000179046	chr4:189018315-189020189	0.124789
SNRNP27	ENSG00000124380	chr2:70131557-70131644	0.183742
PTPN6	ENSG00000111679	chr12:7055902-7060772	-0.280998
SLC35C2	ENSG00000080189	chr20:44984513-44985213	-0.192527
DENND3	ENSG00000105339	chr8:142173528-142175285	-0.230102
TTC23	ENSG00000103852	chr15:99768937-99781570	-0.266063
SBNO2	ENSG00000064932	chr19:1117498-1119010	-0.230882
PDZK1	ENSG00000174827	chr1:145756613-145758846	0.336959
SDCBP2-AS1	ENSG00000234684	chr20:1306173-1330983	-0.118687
ARHGEF40	ENSG00000165801	chr14:21555622-21556127	0.218534
CCDC57	ENSG00000176155	chr17:80141808-80146095	-0.403481
B4GALT3	ENSG00000158850	chr1:161145885-161146224	0.246045
CNTNAP3B	ENSG00000154529	chr9:43737520-43800864	-0.161652
CCDC106	ENSG00000173581	chr19:56159643-56160368	-0.437583
FAM160B2	ENSG00000158863	chr8:21952029-21953848	-0.362297
LTBP4	ENSG00000090006	chr19:41113435-41114126	-0.314889
MOSPD2	ENSG00000130150	chrX:14936904-14939502	0.305879
SNAP25	ENSG00000132639	chr20:10258374-10265372	-0.243738
SLC35C2	ENSG00000080189	chr20:44979529-44980690	-0.223036
RTKN	ENSG00000114993	chr2:74655523-74655758	-0.321946
PRRC2C	ENSG00000117523	chr1:171557644-171558508	0.164607
RAB15	ENSG00000139998	chr14:65417296-65417297	-0.287406
PICK1	ENSG00000100151	chr22:38463777-38465040	-0.220288
IQCB1	ENSG00000173226	chr3:121526290-121544898	0.20634
ERBB2IP	ENSG00000112851	chr5:65371058-65372144	0.165892
DAPK2	ENSG00000035664	chr15:64201022-64204107	0.317985
FAM219B	ENSG00000178761	chr15:75197053-75197495	-0.262265
ZNF561	ENSG00000171469	chr19:9724779-9727721	-0.22259
RP11-231C14.4	ENSG00000169203	chr16:29498720-29502788	0.217956
TRMT44	ENSG00000155275	chr4:8472927-8477499	-0.330906
EPB41L2	ENSG00000079819	chr6:131201346-131206236	-0.194318
ABCA7	ENSG00000064687	chr19:1059084-1061967	0.409191
ZCCHC10	ENSG00000155329	chr5:132354895-132358533	0.109903
SSH2	ENSG00000141298	chr17:28030080-28120912	0.12831
LYPLAL1	ENSG00000143353	chr1:219347323-219352489	-0.186464
PCM1	ENSG00000078674	chr8:17838264-17842956	-0.11815
TEX261	ENSG00000144043	chr2:71216312-71216879	0.406688
CLASRP	ENSG00000104859	chr19:45571316-45571678	0.181325
PNPLA6	ENSG00000032444	chr19:7599402-7599403	0.451588
SF1	ENSG00000168066	chr11:64532990-64534372	-0.18427
ENSG00000215513	ENSG00000215513	chr22:20386675-20387159	-0.717479
PTOV1-AS2	ENSG00000269352	chr19:50361684-50361685	0.122374
NR2C1	ENSG00000120798	chr12:95424405-95425125	0.282783
PHKA2	ENSG00000044446	chrX:18918817-18919603	-0.211616
KDM4C	ENSG00000107077	chr9:6981118-6981842	0.187552
CTD-2600O9.1	ENSG00000187185	chr16:57847785-57849328	-0.308471
TBC1D16	ENSG00000167291	chr17:77925396-77926456	-0.433147
NFKBIZ	ENSG00000144802	chr3:101574302-101574577	-0.240017
CRBN	ENSG00000113851	chr3:3192729-3194140	-0.18265
NCOA2	ENSG00000140396	chr8:71057083-71060508	0.390738
ATG16L2	ENSG00000168010	chr11:72533588-72533893	-0.417904
SMEK1	ENSG00000100796	chr14:91939714-91942194	-0.123488
RBCK1	ENSG00000125826	chr20:408136-409135	-0.4777
LAMA5	ENSG00000130702	chr20:60922084-60926760	-0.191409
U2AF1L4	ENSG00000161265	chr19:36235639-36236026	0.329543
LMBR1L	ENSG00000139636	chr12:49491522-49494171	0.188203
ENTPD5	ENSG00000187097	chr14:74475895-74477794	0.246781
NF1	ENSG00000196712	chr17:29576137-29579956	-0.202092
OFD1	ENSG00000046651	chrX:13774886-13775250	0.345201
TBCEL	ENSG00000154114	chr11:120930794-120943694	0.315066
TMEM164	ENSG00000157600	chrX:109246406-109246729	0.238719
FAM127B	ENSG00000203950	chrX:134185946-134185947	0.257407
SNHG14	ENSG00000224078	chr15:25330469-25332614	0.218558
EID2B	ENSG00000176401	chr19:40022153-40023380	0.221619
SMARCA1	ENSG00000102038	chrX:128626070-128630727	-0.185332
LPIN1	ENSG00000134324	chr2:11913871-11919645	-0.354549
LARP6	ENSG00000166173	chr15:71144671-71146228	0.298113
IFT27	ENSG00000100360	chr22:37160080-37163350	0.426982
ZNF655	ENSG00000197343	chr7:99160117-99161486	-0.211321
IQCB1	ENSG00000173226	chr3:121527856-121544898	-0.286128
LRRC37B	ENSG00000185158	chr17:30362658-30372719	-0.37055
TACC2	ENSG00000138162	chr10:123892249-123954555	-0.314714
PPP2R5B	ENSG00000068971	chr11:64694380-64695274	-0.228686
JAG2	ENSG00000184916	chr14:105611398-105612068	-0.21152
FBXW11	ENSG00000072803	chr5:171341409-171423894	-0.135827
KSR1	ENSG00000141068	chr17:25924462-25930860	0.289669
LRRC75B	ENSG00000178026	chr22:24984297-24985789	-0.258296
UBA6-AS1	ENSG00000248049	chr4:68567202-68586140	-0.335954
ANKMY1	ENSG00000144504	chr2:241420514-241439375	0.224527
SUGP2	ENSG00000064607	chr19:19114417-19114977	0.409529
PVRL1	ENSG00000110400	chr11:119536007-119545869	-0.274411
KIAA1217	ENSG00000120549	chr10:24825822-24833910	-0.231092
ACAD10	ENSG00000111271	chr12:112186279-112186977	-0.444923
MAP3K8	ENSG00000107968	chr10:30728203-30736711	-0.204256
LINC00674	ENSG00000237854	chr17:66110666-66121531	-0.275568
CARS	ENSG00000110619	chr11:3069231-3078573	0.288479
ARHGAP11B	ENSG00000187951	chr15:30927391-30927690	-0.274421
MAFK	ENSG00000198517	chr7:1581934-1581935	-0.102071
HERC2P9	ENSG00000206149	chr15:28878441-28881633	0.274549
TNK2	ENSG00000061938	chr3:195606046-195610028	0.271763
LINC00963	ENSG00000204054	chr9:132251578-132255698	-0.281728
CPNE2	ENSG00000140848	chr16:57171194-57179997	-0.256743
RALGPS2	ENSG00000116191	chr1:178858831-178861365	0.312361
PDXDC2P	ENSG00000196696	chr16:70010635-70011980	-0.159904
MYO18A	ENSG00000196535	chr17:27412666-27413456	-0.326669
GRB7	ENSG00000141738	chr17:37902041-37902166	0.177245
ST7	ENSG00000004866	chr7:116772014-116774178	-0.261957
UPK3BL	ENSG00000267368	chr7:102281220-102283077	-0.217955
FBXW11	ENSG00000072803	chr5:171337801-171341347	0.262712
FAM66C	ENSG00000226711	chr12:8341241-8346799	0.33153
DYX1C1-CCPG1	ENSG00000261771	chr15:55731779-55783321	0.311968
KIAA0319	ENSG00000137261	chr6:24548828-24551662	0.591302
FAM118A	ENSG00000100376	chr22:45719308-45723723	0.214274
ADRM1	ENSG00000130706	chr20:60878837-60881253	0.174705
POMT2	ENSG00000009830	chr14:77750216-77751293	-0.225694
TBCEL	ENSG00000154114	chr11:120943749-120957487	0.274709
GLYR1	ENSG00000140632	chr16:4854522-4854523	0.186641
DTX2P1	ENSG00000186704	chr7:76633624-76634867	-0.103197
LSS	ENSG00000160285	chr21:47615142-47615590	0.209351
SMARCA2	ENSG00000080503	chr9:2123937-2161686	-0.265721
NAPA	ENSG00000105402	chr19:48000171-48003890	0.177019
SPRED2	ENSG00000198369	chr2:65571728-65571853	0.113006
PCSK7	ENSG00000160613	chr11:117094024-117094794	-0.421052
CCNL2	ENSG00000221978	chr1:1326955-1328059	0.292904
BTBD2	ENSG00000133243	chr19:1997462-2015296	-0.442805
UPK3B	ENSG00000243566	chr7:76141199-76143264	-0.369102
MLLT10	ENSG00000078403	chr10:21970305-21971154	-0.15213
SH3TC1	ENSG00000125089	chr4:8237282-8239201	0.264015
SEC24B	ENSG00000138802	chr4:110402937-110412483	0.274208
ECHDC2	ENSG00000121310	chr1:53373434-53373540	0.213788
PIGF	ENSG00000151665	chr2:46842324-46844109	-0.319934
MMP17	ENSG00000198598	chr12:132328626-132329663	-0.505081
IFT122	ENSG00000163913	chr3:129170841-129177442	-0.279891
ABCC3	ENSG00000108846	chr17:48736729-48741042	0.318546
AC009005.2	ENSG00000267751	chr19:571596-571697	0.331764
BCAS3	ENSG00000141376	chr17:59445855-59469338	0.241922
CNPY3	ENSG00000137161	chr6:42902336-42903150	0.30428
ECT2	ENSG00000114346	chr3:172470262-172472299	-0.235071
SLC22A17	ENSG00000092096	chr14:23817205-23817370	-0.252941
AFTPH	ENSG00000119844	chr2:64806680-64812556	-0.148309
FBL	ENSG00000105202	chr19:40331155-40336931	0.190273
MAP7D1	ENSG00000116871	chr1:36639079-36640499	0.189359
RNF212	ENSG00000178222	chr4:1052181-1090553	0.466945
NPRL3	ENSG00000103148	chr16:162774-188149	0.485312
CSNK1E	ENSG00000213923	chr22:38690540-38694791	-0.529443
APOBEC3F	ENSG00000128394	chr22:39439095-39440088	0.47581
EHBP1	ENSG00000115504	chr2:63206470-63217851	-0.233665
WIPF1	ENSG00000115935	chr2:175440108-175446038	-0.311471
AKAP9	ENSG00000127914	chr7:91715000-91718699	0.339799
C8orf44	ENSG00000213865	chr8:67579936-67589877	0.596345
FAM160A2	ENSG00000051009	chr11:6233206-6235641	0.231416
NICN1	ENSG00000145029	chr3:49462871-49463316	-0.318054
KRT80	ENSG00000167767	chr12:52574392-52574687	-0.320786
HNRNPDL	ENSG00000152795	chr4:83346715-83346716	-0.127991
HUWE1	ENSG00000086758	chrX:53675253-53681007	-0.426307
TTLL6	ENSG00000170703	chr17:46847459-46862285	0.335305
PRR13	ENSG00000205352	chr12:53836517-53837175	-0.613768
DIS3L2	ENSG00000144535	chr2:233200584-233201179	-0.307126
TMEM180	ENSG00000138111	chr10:104229832-104231030	0.392543
LYRM5	ENSG00000205707	chr12:25348271-25356854	-0.354296
CYP4F35P	ENSG00000265787	chr18:14339639-14341521	0.514402
ZNF333	ENSG00000160961	chr19:14817585-14819936	0.555581
SLC35E1	ENSG00000127526	chr19:16666208-16677343	-0.192582
POLR3F	ENSG00000132664	chr20:18449705-18453486	-0.111327
SLC35B3	ENSG00000124786	chr6:8430390-8434618	-0.319805
SLC35B3	ENSG00000124786	chr6:8430390-8434618	-0.309996
PML	ENSG00000140464	chr15:74317268-74324913	0.258229
PSRC1	ENSG00000134222	chr1:109823668-109823759	0.329196
TRAIP	ENSG00000183763	chr3:49877806-49878418	-0.355803
TDRKH	ENSG00000182134	chr1:151743038-151746889	0.422475
D2HGDH	ENSG00000180902	chr2:242690803-242694046	-0.122232
VPS29	ENSG00000111237	chr12:110934008-110939854	-0.330713
XXbac-B461K10.4	ENSG00000093100	chr22:18274067-18293469	0.36186
TMEM256-PLSCR3	ENSG00000187838	chr17:7297155-7297423	-0.258301
SMARCD1	ENSG00000066117	chr12:50480661-50481146	-0.24348
SLC35C2	ENSG00000080189	chr20:44980865-44983521	-0.241216
CRYBB2P1	ENSG00000100058	chr22:25851807-25853226	-0.286192
SPIDR	ENSG00000164808	chr8:48642027-48647869	-0.226585
RPS9	ENSG00000170889	chr19:54710420-54710421	0.236098
TMEM44	ENSG00000145014	chr3:194337998-194343953	-0.272543
WDSUB1	ENSG00000196151	chr2:160132149-160136272	-0.311312
ITSN1	ENSG00000205726	chr21:35186376-35189535	0.865693
ROGDI	ENSG00000067836	chr16:4850579-4851268	-0.121129
AHI1	ENSG00000135541	chr6:135639754-135644300	-0.233642
ASXL2	ENSG00000143970	chr2:25976508-25978887	-0.312276
LINC01296	ENSG00000244306	chr14:19857070-19919138	0.301731
MSI2	ENSG00000153944	chr17:55752487-55756910	0.361861
SMPDL3A	ENSG00000172594	chr6:123126234-123127378	0.205258
ING5	ENSG00000168395	chr2:242651486-242662354	0.105919
NCOR1	ENSG00000141027	chr17:16054930-16055260	0.389169
PTPRJ	ENSG00000149177	chr11:48152268-48153063	0.231702
MTG2	ENSG00000101181	chr20:60774313-60775739	-0.210514
SUPT5H	ENSG00000196235	chr19:39948380-39948934	0.274474
CHRNA5	ENSG00000169684	chr15:78882978-78885434	-0.292125
KSR1	ENSG00000141068	chr17:25924462-25930860	0.367086
WIZ	ENSG00000011451	chr19:15538344-15540397	0.212114
ZNF227	ENSG00000131115	chr19:44722005-44732599	0.258503
ZNF783	ENSG00000204946	chr7:148990841-148990842	0.297536
LYRM1	ENSG00000102897	chr16:20912211-20913808	0.522273
ZFP90	ENSG00000184939	chr16:68592471-68596947	-0.260872
SPIRE2	ENSG00000204991	chr16:89930269-89934597	-0.239755
ECHDC2	ENSG00000121310	chr1:53377693-53379567	0.283982
ING2	ENSG00000168556	chr4:184427471-184431435	0.239195
RP11-163E9.2	ENSG00000239969	chr7:102004858-102006421	-0.130144
USB1	ENSG00000103005	chr16:58044016-58048177	-0.286091
AHI1	ENSG00000135541	chr6:135644462-135679270	-0.265368
FLNB	ENSG00000136068	chr3:58124256-58127585	0.184401
LIMCH1	ENSG00000064042	chr4:41687847-41689857	0.172652
KIF21A	ENSG00000139116	chr12:39705355-39713708	-0.257623
ZNF821	ENSG00000102984	chr16:71913926-71917114	0.117347
DNM1	ENSG00000106976	chr9:131002058-131004511	0.183084
SBNO2	ENSG00000064932	chr19:1117498-1119010	-0.210669
NECAB3	ENSG00000125967	chr20:32248201-32260204	0.253254
CASP9	ENSG00000132906	chr1:15834402-15844605	-0.463896
PPM1F	ENSG00000100034	chr22:22277844-22279942	-0.22227
C17orf61-PLSCR3	ENSG00000262481	chr17:7296683-7296786	-0.272266
ZNF530	ENSG00000183647	chr19:58115774-58117054	-0.111612
GUCD1	ENSG00000138867	chr22:24940051-24942882	-0.417371
RELT	ENSG00000054967	chr11:73103513-73104882	-0.2143
PLA2G6	ENSG00000184381	chr22:38524437-38525461	0.212169
SKP2	ENSG00000145604	chr5:36183941-36183942	0.145004
TMEM198B	ENSG00000182796	chr12:56226071-56226743	0.818322
CDK11A	ENSG00000008128	chr1:1635434-1635662	0.208547
HNF4A	ENSG00000101076	chr20:43030127-43034698	0.276661
SEC16A	ENSG00000148396	chr9:139339563-139340097	-0.294635
RIN2	ENSG00000132669	chr20:19972943-19981257	0.240143
ZNF692	ENSG00000171163	chr1:249152892-249153117	0.478378
UROS	ENSG00000188690	chr10:127484757-127486634	-0.18733
TRMT1L	ENSG00000121486	chr1:185108711-185109105	-0.220039
ZNF217	ENSG00000171940	chr20:52185803-52188260	-0.248515
FAM114A1	ENSG00000197712	chr4:38869455-38870019	0.538004
TMEM132A	ENSG00000006118	chr11:60692205-60694051	0.293987
ENSG00000141140	ENSG00000141140	chr17:34888511-34889780	-0.279542
MTMR10	ENSG00000166912	chr15:31269158-31282980	-0.364591
TPCN1	ENSG00000186815	chr12:113726039-113726563	-0.27852
ZNF664	ENSG00000179195	chr12:124472685-124489425	0.352286
ADCK5	ENSG00000173137	chr8:145601179-145603076	0.280599
WAC	ENSG00000095787	chr10:28879761-28897115	-0.303724
C17orf62	ENSG00000178927	chr17:80403836-80407046	0.353642
UBOX5	ENSG00000185019	chr20:3090960-3102030	0.280488
ODF3B	ENSG00000177989	chr22:50969724-50970398	0.218048
ODF2	ENSG00000136811	chr9:131221936-131222792	-0.183787
RP11-392E22.9	ENSG00000273170	chr9:38540846-38542309	0.438867
DYNC2LI1	ENSG00000138036	chr2:44001285-44003921	-0.21777
NINL	ENSG00000101004	chr20:25478982-25481476	-0.511335
NEK6	ENSG00000119408	chr9:127055292-127064215	-0.243621
CTNND1	ENSG00000198561	chr11:57582972-57583769	-0.284444
GOLGA8A	ENSG00000175265	chr15:34837154-34839136	0.580578
SYNPO	ENSG00000171992	chr5:150020416-150027506	0.206208
STAT5B	ENSG00000173757	chr17:40370896-40371330	-0.180191
MORN4	ENSG00000171160	chr10:99377079-99393104	-0.21418
TCIRG1	ENSG00000110719	chr11:67816761-67817130	-0.316379
AKR1C2	ENSG00000151632	chr10:5055812-5057095	0.239838
GCC2-AS1	ENSG00000214184	chr2:109128468-109150389	0.381028
LINC01278	ENSG00000235437	chrX:62652371-62736790	-0.365775
SCYL2	ENSG00000136021	chr12:100661174-100676721	-0.26472
MYLIP	ENSG00000007944	chr6:16143448-16145128	0.278051
ENSG00000108292	ENSG00000108292	chr17:36872081-36872620	-0.2015
NCOA2	ENSG00000140396	chr8:71053634-71060508	-0.462725
AFTPH	ENSG00000119844	chr2:64806680-64812556	-0.191069
SWI5	ENSG00000175854	chr9:131038681-131038986	-0.345455
TREX2	ENSG00000183479	chrX:152719966-152721000	-0.235076
ZNF76	ENSG00000065029	chr6:35261692-35262233	0.227854
RTN2	ENSG00000125744	chr19:45992811-45996418	0.208339
HSF4	ENSG00000102878	chr16:67201125-67201206	0.424529
USP34	ENSG00000115464	chr2:61420115-61430275	-0.215227
PYCR1	ENSG00000183010	chr17:79891252-79892529	0.174901
SDR39U1	ENSG00000100445	chr14:24911001-24911304	0.201707
SUV420H2	ENSG00000133247	chr19:55854015-55854110	0.483838
ATP6V0A1	ENSG00000033627	chr17:40659645-40665879	-0.189444
ACAD10	ENSG00000111271	chr12:112186279-112186815	0.555765
BTBD2	ENSG00000133243	chr19:1997462-2015296	-0.338791
BROX	ENSG00000162819	chr1:222886284-222886930	0.426309
ST6GAL2	ENSG00000144057	chr2:107423405-107446522	-0.350103
ZNF627	ENSG00000198551	chr19:11708445-11725342	-0.511479
CHRNA5	ENSG00000169684	chr15:78882446-78882447	-0.342278
ZNF251	ENSG00000198169	chr8:145980080-145980081	0.338271
HECW1	ENSG00000002746	chr7:43482228-43483814	-0.374452
ENSG00000108753	ENSG00000108753	chr17:36061182-36064924	0.11607
C19orf54	ENSG00000188493	chr19:41247344-41247599	0.341275
CTNND1	ENSG00000198561	chr11:57529518-57556509	-0.185454
BBIP1	ENSG00000214413	chr10:112661370-112677879	-0.301162
CLK1	ENSG00000013441	chr2:201724938-201725961	0.112216
FAM63A	ENSG00000143409	chr1:150975182-150978788	0.432295
KIF21A	ENSG00000139116	chr12:39712003-39713708	0.28638
DPY19L4	ENSG00000156162	chr8:95768387-95773928	-0.255372
MTMR11	ENSG00000014914	chr1:149902857-149903152	-0.196662
PHC1	ENSG00000111752	chr12:9073661-9075229	-0.285017
C1orf174	ENSG00000198912	chr1:3807621-3808190	-0.240367
RBM5	ENSG00000003756	chr3:50137484-50137965	-0.322942
ASXL1	ENSG00000171456	chr20:31017234-31017704	-0.240904
TMCC1	ENSG00000172765	chr3:129373946-129375499	-0.130934
WDR90	ENSG00000161996	chr16:712844-715679	-0.406083
TCEB2	ENSG00000103363	chr16:2821941-2821942	0.26801
DGCR6	ENSG00000183628	chr22:18894238-18897685	-0.233324
PRPF4B	ENSG00000112739	chr6:4062533-4063308	0.244925
FAM20C	ENSG00000177706	chr7:195732-208898	-0.262277
MAP4K4	ENSG00000071054	chr2:102476326-102481392	-0.279571
BTD	ENSG00000169814	chr3:15643401-15676931	-0.366448
LINC01481	ENSG00000257815	chr12:70636673-70637092	-0.257129
ENSG00000242384	ENSG00000242384	chr17:34749596-34750310	-0.913092
SPAG4	ENSG00000061656	chr20:34205508-34205701	-0.359804
C19orf54	ENSG00000188493	chr19:41248094-41248420	0.294973
NEDD4L	ENSG00000049759	chr18:55833093-55912659	-0.115929
COASY	ENSG00000068120	chr17:40714287-40714288	0.165388
NCOR2	ENSG00000196498	chr12:124810916-124811955	-0.286299
VPS28	ENSG00000160948	chr8:145649305-145649424	-0.233906
ALAD	ENSG00000148218	chr9:116151386-116151718	-0.227726
KLC1	ENSG00000126214	chr14:104153548-104166992	-0.206073
MEIS3	ENSG00000105419	chr19:47909783-47910145	-0.253417
RNH1	ENSG00000023191	chr11:502249-504824	-0.269469
HSPA12A	ENSG00000165868	chr10:118460640-118464662	-0.660587
METTL22	ENSG00000067365	chr16:8722967-8729025	0.172515
MYLIP	ENSG00000007944	chr6:16143448-16143930	-0.29925
MTCH1	ENSG00000137409	chr6:36938470-36940479	-0.26647
DPY19L1P1	ENSG00000229358	chr7:32630616-32632796	0.301699
WNK1	ENSG00000060237	chr12:987527-988739	0.677946
HERC2P9	ENSG00000206149	chr15:28878441-28878736	-0.261003
FAM168A	ENSG00000054965	chr11:73122581-73141735	0.298833
MATR3	ENSG00000015479	chr5:138615747-138618428	-0.196488
RAI14	ENSG00000039560	chr5:34796132-34803817	-0.299971
XRN1	ENSG00000114127	chr3:142037536-142037632	-0.331017
TIA1	ENSG00000116001	chr2:70454954-70456396	0.231881
FNBP1L	ENSG00000137942	chr1:94016662-94017966	-0.214541
SLC22A18AS	ENSG00000254827	chr11:2909865-2924689	-0.252071
PLD1	ENSG00000075651	chr3:171455872-171528189	-0.302352
WDR18	ENSG00000065268	chr19:989895-990223	-0.494146
COPZ2	ENSG00000005243	chr17:46110668-46111229	-0.50369
SLC46A1	ENSG00000076351	chr17:26729339-26731634	-0.376271
CLDND2	ENSG00000160318	chr19:51870469-51870711	-0.315542
CLASRP	ENSG00000104859	chr19:45571312-45571678	-0.176533
ZNF217	ENSG00000171940	chr20:52199707-52210295	-0.193093
CTD-3092A11.1	ENSG00000215302	chr15:30776889-30777351	0.278253
CELSR1	ENSG00000075275	chr22:46759144-46759893	-0.303266
IFI27L1	ENSG00000165948	chr14:94563311-94567085	-0.318222
JPX	ENSG00000225470	chrX:73218679-73224105	0.439851
BRD1	ENSG00000100425	chr22:50181142-50187682	-0.394485
LSM7	ENSG00000130332	chr19:2324195-2328386	-0.243028
DPH7	ENSG00000148399	chr9:140469295-140470532	-0.221364
HR	ENSG00000168453	chr8:21974552-21976463	-0.261729
PDDC1	ENSG00000177225	chr11:770398-770679	0.359801
C11orf24	ENSG00000171067	chr11:68029270-68029271	0.119183
EZH1	ENSG00000108799	chr17:40874933-40876323	0.214908
ZNF783	ENSG00000204946	chr7:148990583-148990842	-0.172148
BROX	ENSG00000162819	chr1:222888611-222889026	0.338468
FAM83H	ENSG00000180921	chr8:144812767-144815861	0.256687
WNT7B	ENSG00000188064	chr22:46319215-46326978	-0.203346
ABCC10	ENSG00000124574	chr6:43414184-43414986	-0.334463
SLC35F5	ENSG00000115084	chr2:114513121-114513947	-0.163325
POMT2	ENSG00000009830	chr14:77745212-77745880	0.548582
SLC38A6	ENSG00000139974	chr14:61509930-61512064	0.202802
RC3H2	ENSG00000056586	chr9:125613508-125616231	0.284217
LCORL	ENSG00000178177	chr4:17847524-17910717	0.239275
SP110	ENSG00000135899	chr2:231042971-231048288	-0.268217
C16orf13	ENSG00000130731	chr16:684956-685281	-0.195361
GNPAT	ENSG00000116906	chr1:231403649-231406504	-0.160052
HDAC7	ENSG00000061273	chr12:48192755-48196007	-0.352797
IQCB1	ENSG00000173226	chr3:121516074-121526191	0.193027
MFF	ENSG00000168958	chr2:228212100-228217230	-0.200796
TPM2	ENSG00000198467	chr9:35684804-35685266	-0.129477
CCDC106	ENSG00000173581	chr19:56159643-56160124	0.671395
MAP3K8	ENSG00000107968	chr10:30728203-30736711	-0.217355
MYO18A	ENSG00000196535	chr17:27423933-27424241	-0.376571
PLCB3	ENSG00000149782	chr11:64029548-64029658	0.506442
RP11-334C17.5	ENSG00000262580	chr17:78176186-78176187	0.327194
RBM10	ENSG00000182872	chrX:47028897-47030427	-0.165858
NPHP3	ENSG00000113971	chr3:132440618-132440807	0.469528
COPZ2	ENSG00000005243	chr17:46106542-46109522	-0.397014
DPH3	ENSG00000154813	chr3:16302336-16306276	0.220171
ISOC2	ENSG00000063241	chr19:55967212-55967716	-0.18034
NADK	ENSG00000008130	chr1:1688321-1688620	0.19262
LTBP4	ENSG00000090006	chr19:41103286-41105103	-0.34243
AHI1	ENSG00000135541	chr6:135817036-135818326	-0.408751
CTD-2033A16.3	ENSG00000262136	chr16:69761078-69765322	0.374206
MICAL3	ENSG00000243156	chr22:18274067-18291610	-0.385519
PKD2	ENSG00000118762	chr4:88977419-88979135	-0.204082
GALNT7	ENSG00000109586	chr4:174216994-174218946	-0.206124
ESYT2	ENSG00000117868	chr7:158542414-158545472	0.398059
KSR1	ENSG00000141068	chr17:25937224-25938520	-0.30741
MYO18A	ENSG00000196535	chr17:27409456-27412622	-0.312715
CCDC57	ENSG00000176155	chr17:80137065-80141650	-0.448131
FAM86DP	ENSG00000244026	chr3:75475750-75481959	0.317558
SDHAP1	ENSG00000185485	chr3:195686957-195690171	-0.328288
FSD1	ENSG00000105255	chr19:4310593-4311839	-0.302575
ME3	ENSG00000151376	chr11:86161440-86176133	-0.260641
LINC01184	ENSG00000245937	chr5:127292613-127301855	0.3418
GEMIN8	ENSG00000046647	chrX:14044340-14047896	0.262033
SEC31B	ENSG00000075826	chr10:102257964-102258917	-0.243808
DNAAF3	ENSG00000167646	chr19:55671088-55671267	0.286078
TAF8	ENSG00000137413	chr6:42025251-42034050	-0.204685
EPB41L5	ENSG00000115109	chr2:120858390-120861636	0.47561
PKD1	ENSG00000008710	chr16:2155475-2155866	-0.459703
MKNK2	ENSG00000099875	chr19:2039855-2040133	0.47966
AKAP17A	ENSG00000197976	chrX:1718325-1719031	-0.357719
RPL32P3	ENSG00000251474	chr3:129103061-129104139	0.360331
LDLR	ENSG00000130164	chr19:11213462-11215896	-0.215548
MSH5	ENSG00000204410	chr6:31712358-31715164	-0.28909
EPS8L2	ENSG00000177106	chr11:710027-710028	0.243389
NAT6	ENSG00000243477	chr3:50335103-50335104	0.304724
PPIL2	ENSG00000100023	chr22:22024251-22024855	-0.293237
MAST2	ENSG00000086015	chr1:46499938-46500210	0.169494
SURF2	ENSG00000148291	chr9:136224690-136226826	-0.229596
WNK1	ENSG00000060237	chr12:987527-990858	-0.5907
NR2F1-AS1	ENSG00000237187	chr5:92747215-92889467	-0.1992
SLC47A1	ENSG00000142494	chr17:19452990-19454737	-0.186444
JPX	ENSG00000225470	chrX:73218679-73224105	0.24392
ENSG00000150165	ENSG00000150165	chr10:47158896-47161251	-0.6959
GAS2L1	ENSG00000185340	chr22:29703143-29704077	-0.447079
STAT6	ENSG00000166888	chr12:57502082-57504912	0.211529
TBCK	ENSG00000145348	chr4:107183369-107216251	-0.240231
COASY	ENSG00000068120	chr17:40714505-40714630	0.599671
PAQR5	ENSG00000137819	chr15:69682119-69689807	-0.197588
NPHP3	ENSG00000113971	chr3:132418294-132418762	-0.106833
FANCD2	ENSG00000144554	chr3:10085548-10088264	-0.147224
LRP8	ENSG00000157193	chr1:53742750-53746259	-0.193612
FBXW11	ENSG00000072803	chr5:171337801-171433462	-0.184974
RIMKLB	ENSG00000166532	chr12:8926062-8930186	-0.118763
SNRPB	ENSG00000125835	chr20:2442585-2443282	-0.468085
MTHFSD	ENSG00000103248	chr16:86582183-86585639	-0.283446
G6PC3	ENSG00000141349	chr17:42148551-42151528	-0.184005
ATG16L2	ENSG00000168010	chr11:72534006-72535105	-0.563471
NDUFA6-AS1	ENSG00000237037	chr22:42520051-42520052	0.488184
LSM14B	ENSG00000149657	chr20:60702757-60704841	-0.258547
ERICH1	ENSG00000104714	chr8:614676-618598	-0.180051
GRB10	ENSG00000106070	chr7:50771605-50772837	0.251652
DLG5	ENSG00000151208	chr10:79603464-79613112	-0.176577
ITM2C	ENSG00000135916	chr2:231729860-231738132	-0.305887
G2E3	ENSG00000092140	chr14:31066732-31067689	-0.251029
HM13	ENSG00000101294	chr20:30156083-30156923	0.193264
TMUB2	ENSG00000168591	chr17:42264934-42264935	0.274447
CASK	ENSG00000147044	chrX:41414888-41419032	-0.272818
ATG13	ENSG00000175224	chr11:46639440-46639810	-0.219938
CDC42BPA	ENSG00000143776	chr1:227235711-227257478	-0.227399
GRAMD1A	ENSG00000089351	chr19:35491390-35500023	0.19804
WNK1	ENSG00000060237	chr12:971436-980431	-0.603711
MAP4K4	ENSG00000071054	chr2:102477448-102480283	0.226435
PRPF39	ENSG00000185246	chr14:45565431-45565627	0.170872
RP11-45M22.4	ENSG00000264187	chr17:17135196-17136102	-0.449094
NFKBIZ	ENSG00000144802	chr3:101574052-101574239	-0.222437
HNRNPDL	ENSG00000152795	chr4:83346036-83347190	-0.341569
AC006014.7	ENSG00000242073	chr7:75104454-75113475	-0.247814
ABHD3	ENSG00000158201	chr18:19239304-19243639	0.107009
TRPM7	ENSG00000092439	chr15:50891493-50897063	-0.343283
TMEM63B	ENSG00000137216	chr6:44095415-44102298	-0.339046
OFD1	ENSG00000046651	chrX:13774886-13775779	-0.368733
ROGDI	ENSG00000067836	chr16:4850579-4851268	-0.209962
POLL	ENSG00000166169	chr10:103343438-103344359	0.190377
IMPA1	ENSG00000133731	chr8:82593819-82598487	-0.23535
PRR5	ENSG00000186654	chr22:45098488-45110471	-0.268513
IQSEC2	ENSG00000124313	chrX:53285243-53310678	0.311554
RGS14	ENSG00000169220	chr5:176798397-176798476	0.204869
PNKP	ENSG00000039650	chr19:50369785-50370311	0.251213
TCF3	ENSG00000071564	chr19:1615519-1615685	0.22455
FAM188A	ENSG00000148481	chr10:15879317-15880227	-0.339843
SGCB	ENSG00000163069	chr4:52896029-52899597	-0.282692
PRMT2	ENSG00000160310	chr21:48055675-48056808	0.20524
GUSB	ENSG00000169919	chr7:65440058-65441002	-0.25161
MRI1	ENSG00000037757	chr19:13876943-13879173	-0.208556
FIBP	ENSG00000172500	chr11:65652127-65652406	-0.450542
HECTD1	ENSG00000092148	chr14:31675163-31676597	-0.356095
PEX11G	ENSG00000104883	chr19:7543262-7546919	-0.178366
C12orf76	ENSG00000174456	chr12:110466394-110486168	0.274329
FLRT3	ENSG00000125848	chr20:14309973-14318050	0.197757
TTLL3	ENSG00000214021	chr3:9871079-9876365	0.216419
CCNT2	ENSG00000082258	chr2:135700244-135703671	0.107809
SDR39U1	ENSG00000100445	chr14:24911001-24911552	0.149718
MIR4435-1HG	ENSG00000172965	chr2:112101814-112125064	-0.223709
TMEM184A	ENSG00000164855	chr7:1584117-1584330	0.255002
P2RX5-TAX1BP3	ENSG00000257950	chr17:3592053-3592786	-0.189116
IDH3G	ENSG00000067829	chrX:153051428-153051667	-0.288103
PRIMPOL	ENSG00000164306	chr4:185603490-185606563	-0.25984
TRIM9	ENSG00000100505	chr14:51448821-51464768	-0.34623
PDE4D	ENSG00000113448	chr5:58511794-58882155	-0.378972
DIP2C	ENSG00000151240	chr10:323517-327140	-0.34608
QTRTD1	ENSG00000151576	chr3:113775711-113775846	0.149293
ZNF33A	ENSG00000189180	chr10:38301278-38305799	-0.739471
C9orf114	ENSG00000198917	chr9:131588431-131588663	-0.218292
HDAC7	ENSG00000061273	chr12:48183703-48185042	-0.495291
CTD-2139B15.5	ENSG00000249199	chr5:17370530-17375567	-0.239761
ADH6	ENSG00000172955	chr4:100130085-100131239	-0.320226
PICK1	ENSG00000100151	chr22:38461137-38463711	-0.237161
KITLG	ENSG00000049130	chr12:88939642-88974041	-0.242385
ZNF7	ENSG00000147789	chr8:146054989-146062776	-0.280116
VEGFA	ENSG00000112715	chr6:43746655-43752278	0.241706
ABLIM1	ENSG00000099204	chr10:116207785-116211383	0.289283
LSM7	ENSG00000130332	chr19:2324195-2328386	-0.258713
VPS29	ENSG00000111237	chr12:110934008-110939854	-0.178295
LRSAM1	ENSG00000148356	chr9:130214363-130215758	0.409026
CASK	ENSG00000147044	chrX:41416353-41419032	0.247986
UBXN11	ENSG00000158062	chr1:26628213-26629304	-0.36851
SEC22C	ENSG00000093183	chr3:42594940-42597422	-0.24017
TANK	ENSG00000136560	chr2:162016997-162017796	-0.455353
HNRNPA1	ENSG00000135486	chr12:54675578-54675579	0.182685
PCGF5	ENSG00000180628	chr10:92982740-92987094	0.221869
UCKL1	ENSG00000198276	chr20:62575022-62575750	-0.210614
CYP4F35P	ENSG00000265787	chr18:14339639-14340381	-0.445643
PVT1	ENSG00000249859	chr8:129001537-129021836	-0.417936
HMGCL	ENSG00000117305	chr1:24137289-24140680	-0.238455
CEP41	ENSG00000106477	chr7:130038880-130040548	-0.306091
SUPT20H	ENSG00000102710	chr13:37596454-37598172	0.246704
MARK2	ENSG00000072518	chr11:63670630-63672258	0.232654
RTEL1	ENSG00000258366	chr20:62317225-62317357	0.460667
ZNF761	ENSG00000160336	chr19:53935281-53949480	0.304575
ENSG00000186807	ENSG00000186807	chr10:47755544-47756033	-0.344371
ANKRD52	ENSG00000139645	chr12:56631752-56637022	0.240234
C1orf52	ENSG00000162642	chr1:85724405-85725041	0.260018
ACOT11	ENSG00000162390	chr1:55072938-55073615	-0.413105
SCAMP5	ENSG00000198794	chr15:75309090-75310211	-0.328699
VAMP4	ENSG00000117533	chr1:171671224-171671225	-0.346762
C1orf21	ENSG00000116667	chr1:184476816-184559873	-0.562109
SNHG14	ENSG00000224078	chr15:25304865-25307097	0.403136
WDR90	ENSG00000161996	chr16:709376-709614	0.383303
CLCC1	ENSG00000121940	chr1:109474107-109474108	-0.35434
ATHL1	ENSG00000142102	chr11:290600-290678	0.252269
PHF20L1	ENSG00000129292	chr8:133850056-133851632	-0.182577
NOXA1	ENSG00000188747	chr9:140320782-140320920	0.271326
MICALL2	ENSG00000164877	chr7:1488397-1489876	-0.410146
STK36	ENSG00000163482	chr2:219557016-219557306	-0.466188
TMEM116	ENSG00000198270	chr12:112443107-112450806	-0.409894
SAT1	ENSG00000130066	chrX:23802000-23803445	-0.34693
WASH3P	ENSG00000185596	chr15:102506426-102512786	-0.121196
PIF1	ENSG00000140451	chr15:65113719-65114465	-0.303652
SFXN2	ENSG00000156398	chr10:104486914-104488188	-0.329044
SLC25A35	ENSG00000125434	chr17:8193996-8194160	-0.182229
PROC	ENSG00000115718	chr2:128180984-128185933	0.327963
METTL2B	ENSG00000165055	chr7:128128215-128128377	0.412223
NPM1	ENSG00000181163	chr5:170832407-170833401	0.346954
GTF2IRD1	ENSG00000006704	chr7:73950605-73952466	-0.776848
UPK3B	ENSG00000243566	chr7:76141199-76143264	-0.459015
RPTOR	ENSG00000141564	chr17:78882729-78914296	0.201851
FAM131A	ENSG00000175182	chr3:184053911-184059512	0.369414
NFIB	ENSG00000147862	chr9:14088325-14120439	-0.394042
NUP98	ENSG00000110713	chr11:3707424-3712577	-0.180884
AC007246.3	ENSG00000231312	chr2:39743682-39745724	-0.486292
ABCD4	ENSG00000119688	chr14:74755988-74756186	0.379608
MTFR1L	ENSG00000117640	chr1:26149619-26150135	-0.237375
PCNX	ENSG00000100731	chr14:71445365-71476351	-0.467356
LINC00313	ENSG00000185186	chr21:44895919-44896276	0.535151
PDCD6IPP2	ENSG00000261377	chr15:29083968-29091885	-0.356905
SNHG17	ENSG00000196756	chr20:37049745-37050937	-0.248145
C9orf89	ENSG00000165233	chr9:95873003-95874161	-0.197344
ZC3H13	ENSG00000123200	chr13:46550400-46553948	0.256893
SLC47A1	ENSG00000142494	chr17:19470541-19474791	-0.255389
ATG4B	ENSG00000168397	chr2:242606253-242607558	-0.232173
CBWD1	ENSG00000172785	chr9:175784-177723	0.291211
FBXO38	ENSG00000145868	chr5:147805264-147812987	-0.193079
ST6GALNAC4	ENSG00000136840	chr9:130672807-130674547	0.650912
C21orf58	ENSG00000160298	chr21:47737262-47737926	-0.257714
THOP1	ENSG00000172009	chr19:2807806-2808241	-0.230519
ARFIP2	ENSG00000132254	chr11:6499428-6499968	-0.603231
TIAL1	ENSG00000151923	chr10:121336262-121336592	-0.176041
NEDD4L	ENSG00000049759	chr18:56001124-56002710	0.150852
ZNF333	ENSG00000160961	chr19:14815982-14816903	0.625806
SLC47A1	ENSG00000142494	chr17:19474885-19476093	-0.267425
BBIP1	ENSG00000214413	chr10:112677971-112678879	-0.187373
NBEAL2	ENSG00000160796	chr3:47033436-47035427	-0.442836
NIN	ENSG00000100503	chr14:51221585-51226575	0.616639
BPTF	ENSG00000171634	chr17:65972074-65977552	0.225321
CD44	ENSG00000026508	chr11:35211612-35232793	-0.376004
ITM2C	ENSG00000135916	chr2:231738272-231740335	-0.248593
NINL	ENSG00000101004	chr20:25439165-25442158	-0.452377
CIZ1	ENSG00000148337	chr9:130948055-130950142	-0.293245
RIMKLB	ENSG00000166532	chr12:8926062-8930186	-0.116597
KIF18B	ENSG00000186185	chr17:43010354-43011291	-0.301084
GPC2	ENSG00000213420	chr7:99773988-99774657	-0.224968
RRN3P1	ENSG00000248124	chr16:21823736-21823843	-0.163646
NAPA	ENSG00000105402	chr19:47998853-48003890	-0.177767
OIP5-AS1	ENSG00000247556	chr15:41578298-41590239	-0.198708
BMS1P4	ENSG00000271816	chr10:75481262-75485719	0.628305
ZNF337-AS1	ENSG00000213742	chr20:25654643-25655533	-0.400979
P4HTM	ENSG00000178467	chr3:49028347-49038871	-0.319895
IDUA	ENSG00000127415	chr4:993852-994400	0.415199
ZSCAN32	ENSG00000140987	chr16:3433711-3434459	0.149825
MOK	ENSG00000080823	chr14:102717327-102718093	0.464688
POLL	ENSG00000166169	chr10:103347163-103347961	-0.310519
CLIP1	ENSG00000130779	chr12:122865105-122907068	-0.299939
PABPC1L	ENSG00000101104	chr20:43565371-43566702	-0.218002
ADAM8	ENSG00000151651	chr10:135077269-135080856	-0.314667
SNX14	ENSG00000135317	chr6:86246642-86251703	-0.229809
CREB3L4	ENSG00000143578	chr1:153940360-153940998	-0.294753
ENSG00000138293	ENSG00000138293	chr10:51565296-51579128	-0.451676
NAA16	ENSG00000172766	chr13:41947916-41948878	-0.335841
GAS5	ENSG00000234741	chr1:173833442-173833622	-0.109926
ADD3	ENSG00000148700	chr10:111890244-111892063	0.529785
BLOC1S1	ENSG00000135441	chr12:56110501-56112875	-0.258604
HYAL3	ENSG00000186792	chr3:50332284-50336644	-0.26889
NT5C	ENSG00000125458	chr17:73126962-73127140	-0.269489
MLPH	ENSG00000115648	chr2:238436159-238443207	-0.213631
RP11-632K20.7	ENSG00000223509	chr15:32826113-32828499	-0.103165
PYCR1	ENSG00000183010	chr17:79891252-79892202	-0.195313
C8orf58	ENSG00000241852	chr8:22459825-22460708	-0.261183
SSBP4	ENSG00000130511	chr19:18541740-18542163	0.472742
DIAPH1	ENSG00000131504	chr5:140966764-140967791	-0.383253
ZC3H11A	ENSG00000058673	chr1:203771389-203771390	-0.21747
C19orf48	ENSG00000167747	chr19:51305514-51305711	-0.269654
G2E3	ENSG00000092140	chr14:31058690-31061529	-0.307716
ZNF775	ENSG00000196456	chr7:150105872-150107248	0.341844
PRPF3	ENSG00000117360	chr1:150298339-150300779	-0.531194
ELMOD3	ENSG00000115459	chr2:85581952-85582678	0.278367
SLC22A18	ENSG00000110628	chr11:2940637-2942582	-0.469436
HAPLN3	ENSG00000140511	chr15:89422500-89424588	-0.152116
NICN1	ENSG00000145029	chr3:49463429-49463685	-0.306008
HPCAL1	ENSG00000115756	chr2:10546487-10548688	0.485533
MMP24-AS1	ENSG00000126005	chr20:33865100-33865101	-0.191677
RBM33	ENSG00000184863	chr7:155499762-155503867	-0.254283
ATP6V0A1	ENSG00000033627	chr17:40653322-40659538	-0.179673
CACNG7	ENSG00000105605	chr19:54418759-54445290	0.292335
GPSM1	ENSG00000160360	chr9:139251002-139252466	-0.864665
CTD-2020K17.1	ENSG00000267121	chr17:43297821-43298235	-0.247875
FCHSD1	ENSG00000197948	chr5:141030150-141030587	0.245148
EHBP1L1	ENSG00000173442	chr11:65351236-65351712	-0.200356
DENND5A	ENSG00000184014	chr11:9191496-9192174	-0.195326
HDAC7	ENSG00000061273	chr12:48185787-48187152	-0.359423
LTBP3	ENSG00000168056	chr11:65311020-65311535	0.156032
HLX-AS1	ENSG00000257551	chr1:221045033-221053191	-0.278163
PPIL2	ENSG00000100023	chr22:22049785-22051174	0.42728
SCAMP5	ENSG00000198794	chr15:75305146-75308934	-0.356581
CST3	ENSG00000101439	chr20:23610102-23614551	-0.537976
MTERF4	ENSG00000122085	chr2:242036842-242041668	0.208224
MIIP	ENSG00000116691	chr1:12089338-12089822	-0.211419
SNX5	ENSG00000089006	chr20:17937681-17941783	0.162643
WNK1	ENSG00000060237	chr12:971436-977032	0.299868
DBP	ENSG00000105516	chr19:49136912-49138837	-0.129641
MTFR1	ENSG00000066855	chr8:66620246-66621211	-0.2864
ANKMY2	ENSG00000106524	chr7:16676080-16684310	0.443811
MSI2	ENSG00000153944	chr17:55752487-55756910	0.371468
RHOBTB1	ENSG00000072422	chr10:62631201-62631202	-0.361666
LRRFIP2	ENSG00000093167	chr3:37125297-37136283	0.264841
TMEM161B	ENSG00000164180	chr5:87492305-87494793	0.231283
TSPAN9	ENSG00000011105	chr12:3310422-3388158	0.19223
NR1H3	ENSG00000025434	chr11:47280810-47281342	-0.350901
TAF1A	ENSG00000143498	chr1:222737467-222742852	-0.418612
MGAT5B	ENSG00000167889	chr17:74899458-74899651	0.212379
AMMECR1L	ENSG00000144233	chr2:128622779-128624474	-0.109906
AMPD2	ENSG00000116337	chr1:110162900-110163536	0.222024
MBNL1	ENSG00000152601	chr3:152173366-152174056	0.143629
CTC-459F4.3	ENSG00000267575	chr19:28289084-28296513	0.218976
PHKA2	ENSG00000044446	chrX:18915451-18919603	0.246464
ANKRD10	ENSG00000088448	chr13:111545610-111558380	-0.176368
GRB7	ENSG00000141738	chr17:37900460-37901139	0.215397
KIAA0141	ENSG00000081791	chr5:141314151-141316763	-0.199621
ADGRL2	ENSG00000117114	chr1:82451039-82456075	-0.275558
RP11-43F13.1	ENSG00000188002	chr5:1629745-1632759	-0.31614
RP11-488L18.4	ENSG00000227671	chr1:247373000-247373993	0.214569
TMX3	ENSG00000166479	chr18:66355002-66358532	-0.271129
L3MBTL2	ENSG00000100395	chr22:41613206-41615423	-0.479009
NUPL2	ENSG00000136243	chr7:23236385-23239077	-0.175031
NAT1	ENSG00000171428	chr8:18067689-18076920	-0.439774
CD47	ENSG00000196776	chr3:107766139-107770786	-0.312504
TRIOBP	ENSG00000100106	chr22:38142427-38147779	-0.208514
CTSL	ENSG00000135047	chr9:90341168-90342509	-0.180896
SLC38A7	ENSG00000103042	chr16:58704071-58704774	0.459596
NSUN5P2	ENSG00000106133	chr7:72425018-72425164	-0.355482
C19orf66	ENSG00000130813	chr19:10202306-10202746	-0.175807
MTMR12	ENSG00000150712	chr5:32230453-32233879	-0.204519
RIC8B	ENSG00000111785	chr12:107254190-107279682	-0.29352
STX18	ENSG00000168818	chr4:4426949-4436497	-0.31017
PRAME	ENSG00000185686	chr22:22893511-22899965	0.256503
KRAS	ENSG00000133703	chr12:25398329-25403685	-0.298116
DICER1	ENSG00000100697	chr14:95555345-95556850	0.211798
BX255923.2	ENSG00000204790	chr9:69245163-69245941	0.371173
SNRNP27	ENSG00000124380	chr2:70131557-70131558	-0.192236
MTA1	ENSG00000182979	chr14:105911848-105916395	0.261129
UBXN11	ENSG00000158062	chr1:26610973-26611955	0.152381
LPIN3	ENSG00000132793	chr20:39986087-39986522	-0.400081
RP3-449O17.1	ENSG00000244627	chr22:38757565-38776375	-0.26278
C9orf142	ENSG00000148362	chr9:139887426-139887505	0.186413
BCL2L2-PABPN1	ENSG00000258643	chr14:23777408-23780182	0.400689
TCF25	ENSG00000141002	chr16:89960266-89961446	-0.53342
NUDT14	ENSG00000183828	chr14:105639598-105642871	-0.221046
RP13-20L14.6	ENSG00000265458	chr17:80415424-80416293	-0.466383
TBL1XR1	ENSG00000177565	chr3:176782810-176797615	0.229019
DPH3	ENSG00000154813	chr3:16302336-16305662	-0.208811
RP11-60L3.1	ENSG00000259264	chr15:74504618-74510838	-0.344332
AKR1C2	ENSG00000151632	chr10:5046206-5048651	-0.288022
CAPRIN2	ENSG00000110888	chr12:30869610-30872013	0.213755
MUC13	ENSG00000173702	chr3:124646837-124653505	0.104648
THAP2	ENSG00000173451	chr12:72058360-72058649	0.241758
RAB23	ENSG00000112210	chr6:57061404-57086524	0.236456
ANXA6	ENSG00000197043	chr5:150489407-150496688	0.372437
DGUOK	ENSG00000114956	chr2:74177859-74184252	-0.194381
ACOT9	ENSG00000123130	chrX:23751334-23752458	-0.227635
VHL	ENSG00000134086	chr3:10183871-10188198	-0.375534
SUFU	ENSG00000107882	chr10:104377185-104378823	0.311533
RMDN1	ENSG00000176623	chr8:87480652-87482447	0.332571
PRPF3	ENSG00000117360	chr1:150302967-150305155	0.189155
PRR5	ENSG00000186654	chr22:45073120-45098372	-0.308962
FAM107B	ENSG00000065809	chr10:14572514-14646239	0.170471
ENSG00000236624	ENSG00000236624	chr1:45963055-45965017	-0.336867
MFSD12	ENSG00000161091	chr19:3544730-3544807	0.397184
SLC25A26	ENSG00000144741	chr3:66271553-66286968	0.269754
DLG4	ENSG00000132535	chr17:7094677-7096802	0.278395
TRAPPC12	ENSG00000171853	chr2:3464107-3469368	-0.18553
CCNL2	ENSG00000221978	chr1:1326245-1328776	0.290874
CTIF	ENSG00000134030	chr18:46066202-46145909	0.333512
ECHDC2	ENSG00000121310	chr1:53377693-53379567	0.237488
TFAM	ENSG00000108064	chr10:60148579-60154118	0.176969
DESI1	ENSG00000100418	chr22:42000157-42003266	-0.238242
DPH5	ENSG00000117543	chr1:101479374-101487197	-0.20188
ASMTL	ENSG00000169093	chrX:1538007-1540551	-0.390957
OLMALINC	ENSG00000235823	chr10:102133769-102140973	-0.501177
FBXO9	ENSG00000112146	chr6:52958776-52960311	-0.180288
ZNF266	ENSG00000174652	chr19:9529307-9529893	-0.307148
SP110	ENSG00000135899	chr2:231041440-231048288	0.18189
VEZF1	ENSG00000136451	chr17:56060754-56065440	-0.373587
IGSF3	ENSG00000143061	chr1:117146647-117150564	-0.225163
RP4-800G7.2	ENSG00000244560	chr7:148990841-148990842	0.299726
MTSS1L	ENSG00000132613	chr16:70699443-70708209	-0.152781
AKR1E2	ENSG00000165568	chr10:4884696-4889340	0.366243
GIT2	ENSG00000139436	chr12:110389121-110390897	-0.270213
ENSG00000138041	ENSG00000138041	chr2:55804492-55806815	-0.29151
EPB41	ENSG00000159023	chr1:29379824-29385101	0.315082
TDRKH	ENSG00000182134	chr1:151746703-151746889	0.259236
MON2	ENSG00000061987	chr12:62959160-62959794	0.370451
COX11	ENSG00000166260	chr17:53029473-53031022	-0.316597
CD40	ENSG00000101017	chr20:44751858-44755279	-0.367546
OLMALINC	ENSG00000235823	chr10:102133769-102140973	-0.435579
C16orf13	ENSG00000130731	chr16:684797-684889	0.271229
PXDC1	ENSG00000168994	chr6:3723970-3737313	0.205229
IFT27	ENSG00000100360	chr22:37154453-37158948	-0.168581
RPS18	ENSG00000231500	chr6:33243434-33243574	-0.236086
SYNJ2BP	ENSG00000213463	chr14:70842488-70883617	0.253132
MEGF8	ENSG00000105429	chr19:42875634-42879659	0.217213
ENTPD6	ENSG00000197586	chr20:25176503-25187712	0.22792
NPAS2	ENSG00000170485	chr2:101549463-101554215	-0.473553
MGAT5B	ENSG00000167889	chr17:74922812-74928727	-0.468743
FAM63A	ENSG00000143409	chr1:150975182-150978788	0.491071
CROCCP2	ENSG00000215908	chr1:16959841-16961522	-0.216363
ENSG00000165390	ENSG00000165390	chr10:48270592-48270593	-0.316631
VPS28	ENSG00000160948	chr8:145649305-145649424	-0.213305
CRYZ	ENSG00000116791	chr1:75172678-75172787	-0.193889
RFT1	ENSG00000163933	chr3:53164018-53164354	0.170706
BOK	ENSG00000176720	chr2:242498408-242498870	-0.508505
AKR1E2	ENSG00000165568	chr10:4884049-4884613	-0.327759
CCM2	ENSG00000136280	chr7:45112382-45113059	-0.188117
NPEPL1	ENSG00000215440	chr20:57287635-57287636	0.212074
NFX1	ENSG00000086102	chr9:33347115-33351558	0.225676
TBCK	ENSG00000145348	chr4:107173164-107216251	0.228457
LINC00969	ENSG00000242086	chr3:195416309-195423232	-0.443995
NCAPG2	ENSG00000146918	chr7:158439255-158443524	-0.258026
KDM3A	ENSG00000115548	chr2:86669356-86676930	-0.114053
AC138969.4	ENSG00000183889	chr16:16419324-16419715	-0.801245
SPHK1	ENSG00000176170	chr17:74381735-74381736	0.24819
PHOSPHO2	ENSG00000144362	chr2:170551132-170551725	-0.354664
TBC1D22A	ENSG00000054611	chr22:47158745-47188417	-0.277327
HGSNAT	ENSG00000165102	chr8:43002206-43013718	-0.35805
HEATR3	ENSG00000155393	chr16:50100893-50102691	0.265562
RBM10	ENSG00000182872	chrX:47028897-47032527	0.186159
INO80E	ENSG00000169592	chr16:30012851-30016542	0.241562
NFKBIB	ENSG00000104825	chr19:39399370-39399371	-0.243091
C6orf1	ENSG00000186577	chr6:34214926-34215458	0.224004
EIF3F	ENSG00000175390	chr11:8013518-8013631	0.297582
DENND5A	ENSG00000184014	chr11:9164392-9164950	-0.132743
IPO8	ENSG00000133704	chr12:30837391-30843430	-0.319606
MICALL1	ENSG00000100139	chr22:38302575-38307959	-0.336159
SETX	ENSG00000107290	chr9:135140372-135145002	-0.201716
DNAJB14	ENSG00000164031	chr4:100844342-100851607	-0.237817
SRP14-AS1	ENSG00000248508	chr15:40338270-40357422	0.45316
MLYCD	ENSG00000103150	chr16:83945972-83948561	-0.215031
C9orf3	ENSG00000148120	chr9:97563284-97686268	0.429767
STAT5B	ENSG00000173757	chr17:40370348-40371330	0.180956
TMEM175	ENSG00000127419	chr4:942403-944209	0.277838
MSRB3	ENSG00000174099	chr12:65847605-65856935	-0.439583
NCOR2	ENSG00000196498	chr12:124859009-124862783	-0.307396
RP11-64D22.5	ENSG00000250271	chr3:151521713-151525147	0.387275
ZC3H11A	ENSG00000058673	chr1:203765624-203770703	0.258292
GYS1	ENSG00000104812	chr19:49486094-49488718	-0.238415
RIN2	ENSG00000132669	chr20:19972943-19977323	-0.287081
TXNDC17	ENSG00000129235	chr17:6545154-6545569	-0.152705
NPEPL1	ENSG00000215440	chr20:57287876-57287877	0.220546
SLC38A7	ENSG00000103042	chr16:58709958-58710193	-0.251056
SEMA4C	ENSG00000168758	chr2:97529139-97529419	0.206694
MTERF4	ENSG00000122085	chr2:242039309-242041668	-0.12219
LTB4R2	ENSG00000213906	chr14:24775073-24779377	-0.328258
NPRL3	ENSG00000103148	chr16:162774-180521	0.231028
PFDN5	ENSG00000123349	chr12:53689423-53690214	0.302906
ARFIP2	ENSG00000132254	chr11:6499428-6499968	-0.669475
PPFIA1	ENSG00000131626	chr11:70196145-70200407	0.415112
GPRASP2	ENSG00000158301	chrX:101968145-101968710	-0.311203
RPGR	ENSG00000156313	chrX:38147294-38150212	-0.287833
PCBP1-AS1	ENSG00000179818	chr2:70278437-70310670	-0.104159
AURKB	ENSG00000178999	chr17:8113567-8113848	-0.197154
WDR19	ENSG00000157796	chr4:39274681-39274794	0.162685
BCORL1	ENSG00000085185	chrX:129144639-129146554	0.45478
TMEM222	ENSG00000186501	chr1:27657295-27658561	-0.548397
DMXL2	ENSG00000104093	chr15:51751857-51752487	0.10768
METTL8	ENSG00000123600	chr2:172182658-172187069	-0.284486
ENSG00000108272	ENSG00000108272	chr17:34951610-34954592	-0.314104
IKBKB	ENSG00000104365	chr8:42129723-42147674	0.226394
AP1S2	ENSG00000182287	chrX:15851647-15863502	0.224473
MFI2	ENSG00000163975	chr3:196744161-196748275	-0.288549
SMARCD1	ENSG00000066117	chr12:50493348-50493837	-0.234467
PLXNA2	ENSG00000076356	chr1:208250634-208252605	0.347214
MORC4	ENSG00000133131	chrX:106184862-106185206	-0.221524
ATP1A1-AS1	ENSG00000203865	chr1:116956535-116961081	0.379475
IMPA1	ENSG00000133731	chr8:82593819-82598487	-0.26485
C9orf3	ENSG00000148120	chr9:97843454-97844857	-0.172281
PCSK6	ENSG00000140479	chr15:101847530-101853581	-0.279526
SLC46A1	ENSG00000076351	chr17:26726729-26727626	-0.360189
RPP40	ENSG00000124787	chr6:4996654-5000043	0.363803
ECT2	ENSG00000114346	chr3:172473164-172474773	-0.18315
MON2	ENSG00000061987	chr12:62959811-62960102	0.335439
ARSE	ENSG00000157399	chrX:2873578-2878419	0.468998
SSH1	ENSG00000084112	chr12:109196144-109198832	-0.284674
PPP1R7	ENSG00000115685	chr2:242105856-242109196	-0.117092
EML1	ENSG00000066629	chr14:100404249-100407079	0.245053
ZNF558	ENSG00000167785	chr19:8931982-8932679	-0.508028
SLC38A1	ENSG00000111371	chr12:46637097-46662648	-0.259911
PDDC1	ENSG00000177225	chr11:771426-772427	-0.327087
POLR2J4	ENSG00000214783	chr7:44012922-44026200	-0.431558
JADE2	ENSG00000043143	chr5:133912586-133914184	-0.325387
MAPK9	ENSG00000050748	chr5:179707608-179718848	-0.37442
TCF25	ENSG00000141002	chr16:89940267-89949759	-0.339764
RNPEPL1	ENSG00000142327	chr2:241513308-241513530	-0.169194
RPL17	ENSG00000265681	chr18:47017815-47017902	-0.175817
TIAL1	ENSG00000151923	chr10:121340050-121341434	0.197985
SHC1	ENSG00000160691	chr1:154942675-154946724	-0.186422
KPNA4	ENSG00000186432	chr3:160282428-160283002	0.309883
NFKBIB	ENSG00000104825	chr19:39399178-39399179	-0.289615
FLRT3	ENSG00000125848	chr20:14308204-14318050	-0.151539
PRDM15	ENSG00000141956	chr21:43224774-43236061	0.36443
MTMR11	ENSG00000014914	chr1:149908122-149908475	-0.198636
TRIM65	ENSG00000141569	chr17:73887428-73887894	0.190694
ARRB2	ENSG00000141480	chr17:4614039-4618308	-0.226546
POMT2	ENSG00000009830	chr14:77745212-77746166	-0.385693
ALS2CL	ENSG00000178038	chr3:46720777-46721358	0.572922
XPC	ENSG00000154767	chr3:14193916-14197835	-0.507757
SMC5	ENSG00000198887	chr9:72959185-72961982	-0.319923
RRBP1	ENSG00000125844	chr20:17660720-17662673	0.190443
ACSS1	ENSG00000154930	chr20:24994709-24995774	-0.269065
MED16	ENSG00000175221	chr19:875454-879937	0.204189
RPL32	ENSG00000144713	chr3:12881741-12882269	-0.232662
AHSA2	ENSG00000173209	chr2:61412753-61413581	0.268117
ARRB2	ENSG00000141480	chr17:4618338-4619268	-0.235717
DTX2P1-UPK3BP1-PMS2P11	ENSG00000265479	chr7:76633624-76634867	-0.112578
REPIN1	ENSG00000214022	chr7:150066957-150067849	-0.101377
IKBKB	ENSG00000104365	chr8:42151030-42162705	-0.192233
LINC00963	ENSG00000204054	chr9:132251578-132265602	0.184876
RABL2A	ENSG00000144134	chr2:114398582-114398583	0.319326
ATRX	ENSG00000085224	chrX:76944420-76949313	0.32626
ICAM3	ENSG00000076662	chr19:10445084-10445085	0.23889
PGPEP1	ENSG00000130517	chr19:18468425-18480516	0.375776
GEMIN7	ENSG00000142252	chr19:45583287-45593365	-0.282702
FIBP	ENSG00000172500	chr11:65652127-65652406	-0.442563
HKR1	ENSG00000181666	chr19:37809088-37813087	-0.303804
NSA2	ENSG00000164346	chr5:74068246-74069693	-0.228048
CCDC125	ENSG00000183323	chr5:68581913-68588015	0.33944
HEXDC	ENSG00000169660	chr17:80397589-80398349	0.34346
LRSAM1	ENSG00000148356	chr9:130223536-130223892	0.45897
ATG4B	ENSG00000168397	chr2:242608100-242610141	-0.255937
FAM229B	ENSG00000203778	chr6:112408923-112420473	0.286011
GLTSCR1	ENSG00000063169	chr19:48184533-48185233	0.3128
EPS8L2	ENSG00000177106	chr11:709795-709796	0.218043
BMP1	ENSG00000168487	chr8:22054933-22059316	-0.247159
ENSG00000237792	ENSG00000237792	chr9:65602810-65631903	0.108649
HSF4	ENSG00000102878	chr16:67200298-67200461	-0.238411
HKR1	ENSG00000181666	chr19:37815167-37838092	-0.279198
C17orf53	ENSG00000125319	chr17:42232032-42232221	-0.228581
RRNAD1	ENSG00000143303	chr1:156703312-156705517	-0.213269
CEPT1	ENSG00000134255	chr1:111703918-111717501	-0.170982
C17orf70	ENSG00000185504	chr17:79518229-79518758	0.42012
TAPBP	ENSG00000231925	chr6:33269548-33271732	-0.367178
SLC25A22	ENSG00000177542	chr11:795169-798217	-0.413039
IDH3B	ENSG00000101365	chr20:2639168-2639169	-0.1726
CNEP1R1	ENSG00000205423	chr16:50059251-50060307	-0.442718
PRDM11	ENSG00000019485	chr11:45226329-45234020	0.421176
CTD-2017D11.1	ENSG00000268362	chr19:24216423-24225245	-0.209465
SLC22A5	ENSG00000197375	chr5:131706057-131706140	0.484662
ZXDC	ENSG00000070476	chr3:126158570-126180378	0.201579
RP11-69E11.4	ENSG00000182109	chr1:39988177-39989234	-0.237492
BRPF1	ENSG00000156983	chr3:9784225-9784628	0.330463
MTMR1	ENSG00000063601	chrX:149924337-149931038	-0.175317
ZUFSP	ENSG00000153975	chr6:116981532-116981899	0.199054
NCOA7	ENSG00000111912	chr6:126112213-126136437	-0.123783
SCYL2	ENSG00000136021	chr12:100661174-100676721	-0.242485
MAPK12	ENSG00000188130	chr22:50696730-50699596	-0.268248
ENSG00000150165	ENSG00000150165	chr10:47158896-47163959	0.717142
SH3TC1	ENSG00000125089	chr4:8233883-8234135	0.273358
MARK3	ENSG00000075413	chr14:103958371-103964839	-0.364602
PHKA1	ENSG00000067177	chrX:71839155-71842959	-0.182197
MPHOSPH9	ENSG00000051825	chr12:123707674-123714808	-0.184229
C9orf89	ENSG00000165233	chr9:95874220-95874500	-0.189374
ALG13	ENSG00000101901	chrX:110980107-110987896	-0.573244
AACS	ENSG00000081760	chr12:125621410-125626638	-0.260455
ZNF12	ENSG00000164631	chr7:6743942-6744790	0.416322
EXOC3	ENSG00000180104	chr5:464527-465226	-0.20618
SPTBN2	ENSG00000173898	chr11:66464011-66466110	-0.221396
PPARG	ENSG00000132170	chr3:12353952-12421203	-0.289637
DHRS4L2	ENSG00000187630	chr14:24470142-24470242	-0.100782
EXOC3	ENSG00000180104	chr5:446464-447133	0.477421
PSMA3-AS1	ENSG00000257621	chr14:58752474-58753358	-0.356916
CIB2	ENSG00000136425	chr15:78403618-78416047	-0.299541
NDEL1	ENSG00000166579	chr17:8339363-8347578	-0.20884
RP11-45M22.4	ENSG00000264187	chr17:17131475-17135108	-0.517747
SEC31A	ENSG00000138674	chr4:83752128-83763293	0.335807
OGFOD2	ENSG00000111325	chr12:123460948-123461201	0.172889
RNF135	ENSG00000181481	chr17:29311778-29314962	-0.109707
PKD1P5	ENSG00000254681	chr16:18475892-18476283	-0.386754
EHBP1L1	ENSG00000173442	chr11:65349487-65349488	-0.198141
C16orf13	ENSG00000130731	chr16:685340-685612	-0.209843
LINC00969	ENSG00000242086	chr3:195408537-195410623	-0.380636
PEX16	ENSG00000121680	chr11:45939044-45939251	-0.236353
MAPK12	ENSG00000188130	chr22:50694310-50694514	-0.200029
MOK	ENSG00000080823	chr14:102717324-102718093	-0.418862
MGAT5B	ENSG00000167889	chr17:74942532-74943912	-0.617841
COX5B	ENSG00000135940	chr2:98263129-98263530	-0.222478
ENSG00000243452	ENSG00000243452	chr1:148568877-148577358	-0.365622
WNT3	ENSG00000108379	chr17:44846165-44847149	-0.280625
PLEKHA6	ENSG00000143850	chr1:204191907-204192590	-0.402181
ADD3	ENSG00000148700	chr10:111890244-111893084	-0.522439
PKD1L2	ENSG00000166473	chr16:81201706-81204548	-0.369155
FBXO44	ENSG00000132879	chr1:11721365-11722682	-0.357882
PPIL2	ENSG00000100023	chr22:22024900-22025286	-0.199637
CCDC53	ENSG00000120860	chr12:102411583-102419752	-0.365323
CCDC57	ENSG00000176155	chr17:80136481-80141650	0.456344
INVS	ENSG00000119509	chr9:103054718-103055229	-0.206289
GLB1L2	ENSG00000149328	chr11:134215023-134217219	-0.296248
ZBTB25	ENSG00000089775	chr14:64954775-64957079	0.303716
KRAS	ENSG00000133703	chr12:25380346-25398208	-0.296649
AKT1	ENSG00000142208	chr14:105259641-105260456	0.357096
RFNG	ENSG00000169733	chr17:80008640-80009170	-0.197211
SETD5	ENSG00000168137	chr3:9506356-9510203	0.430554
AKAP17A	ENSG00000197976	chrX:1718325-1718326	0.267217
ENSG00000174111	ENSG00000174111	chr17:36517658-36520635	-0.335101
PPP2R5B	ENSG00000068971	chr11:64693405-64694184	-0.318332
TRIM24	ENSG00000122779	chr7:138239609-138252226	-0.218249
RP11-69E11.4	ENSG00000182109	chr1:39989568-39990508	-0.487395
MRPS18A	ENSG00000096080	chr6:43643230-43643231	0.282746
KIZ	ENSG00000088970	chr20:21224926-21227117	-0.654439
HDAC7	ENSG00000061273	chr12:48192755-48213550	0.386961
ODF2	ENSG00000136811	chr9:131219716-131221846	0.297446
BIVM	ENSG00000134897	chr13:103468904-103473387	-0.223013
DOCK9	ENSG00000088387	chr13:99478194-99479084	0.280442
CALCOCO1	ENSG00000012822	chr12:54106343-54106344	0.283958
OBSCN	ENSG00000154358	chr1:228527802-228528207	-0.233408
B4GALT2	ENSG00000117411	chr1:44445183-44446781	-0.678912
SDR39U1	ENSG00000100445	chr14:24911001-24911552	0.197297
PABPC1L	ENSG00000101104	chr20:43560667-43561698	-0.428179
SEMA4F	ENSG00000135622	chr2:74884751-74889859	0.321348
TMEM132A	ENSG00000006118	chr11:60701216-60701443	0.499263
ZNF740	ENSG00000139651	chr12:53581547-53582321	0.487815
MMP24-AS1	ENSG00000126005	chr20:33865144-33865145	-0.184411
SPHK2	ENSG00000063176	chr19:49131534-49131938	-0.265408
GEM	ENSG00000164949	chr8:95272740-95274433	-0.204423
ANKRD13D	ENSG00000172932	chr11:67059651-67067001	0.249865
RRP7BP	ENSG00000182841	chr22:42967889-42970686	-0.259976
LPIN1	ENSG00000134324	chr2:11916319-11919645	0.310047
FDPS	ENSG00000160752	chr1:155278756-155279834	-0.242492
PRMT7	ENSG00000132600	chr16:68380183-68381114	-0.219488
PITPNM2	ENSG00000090975	chr12:123498589-123519060	-0.260099
U2AF1L4	ENSG00000161265	chr19:36236113-36236249	-0.239393
ZFAND5	ENSG00000107372	chr9:74975703-74979612	-0.249809
PCNX	ENSG00000100731	chr14:71462642-71476351	0.483656
SLC44A1	ENSG00000070214	chr9:108147783-108200562	0.306852
FAM104B	ENSG00000182518	chrX:55185661-55187408	-0.284694
MGRN1	ENSG00000102858	chr16:4727573-4730033	0.363437
FKBP10	ENSG00000141756	chr17:39975927-39975928	0.205468
ASXL1	ENSG00000171456	chr20:31017856-31019124	-0.171708
BCHE	ENSG00000114200	chr3:165504099-165555102	-0.299529
ANXA13	ENSG00000104537	chr8:124724993-124749560	-0.221152
THOC1	ENSG00000079134	chr18:260304-264026	-0.193054
MTIF2	ENSG00000085760	chr2:55476670-55479613	-0.141443
ARSE	ENSG00000157399	chrX:2867768-2871184	-0.186136
CBS	ENSG00000160200	chr21:44474093-44476913	-0.207403
CEP170	ENSG00000143702	chr1:243289436-243289437	-0.189226
EML1	ENSG00000066629	chr14:100404249-100405534	-0.175509
PLCG1	ENSG00000124181	chr20:39791632-39791843	-0.177218
POLR2H	ENSG00000163882	chr3:184079934-184080661	0.300258
SREBF1	ENSG00000072310	chr17:17720771-17720862	0.245551
MRPL20	ENSG00000242485	chr1:1341266-1341606	0.370382
C21orf58	ENSG00000160298	chr21:47735461-47737122	-0.300328
UBE3A	ENSG00000114062	chr15:25650649-25683636	0.33293
GSDMB	ENSG00000073605	chr17:38063240-38065211	0.289102
TMUB2	ENSG00000168591	chr17:42264477-42265044	-0.33329
ETV4	ENSG00000175832	chr17:41613847-41622642	0.219499
PLA2G6	ENSG00000184381	chr22:38565474-38577671	0.362957
MAPK7	ENSG00000166484	chr17:19283260-19283921	-0.271744
RPTOR	ENSG00000141564	chr17:78899280-78914296	-0.229685
LINC00511	ENSG00000227036	chr17:70427365-70588342	-0.234324
ARSE	ENSG00000157399	chrX:2873578-2876315	-0.44906
CELSR1	ENSG00000075275	chr22:46807656-46829290	-0.448745
CCNT2	ENSG00000082258	chr2:135703716-135705306	0.335099
SH2B1	ENSG00000178188	chr16:28875266-28877333	0.33456
SYNJ2BP	ENSG00000213463	chr14:70842488-70883617	0.277137
ENSG00000223477	ENSG00000223477	chr10:47013076-47072857	0.218846
FKBP15	ENSG00000119321	chr9:115964909-115968789	0.199268
TOP3B	ENSG00000100038	chr22:22311967-22312864	-0.27335
USP37	ENSG00000135913	chr2:219341704-219346793	-0.278617
PDE8A	ENSG00000073417	chr15:85666424-85669438	-0.271978
CNEP1R1	ENSG00000205423	chr16:50059251-50060307	-0.450256
CLCC1	ENSG00000121940	chr1:109475123-109477247	-0.193001
KAT2A	ENSG00000108773	chr17:40270421-40271263	-0.176251
UBE3B	ENSG00000151148	chr12:109959356-109961783	-0.360757
CCNJL	ENSG00000135083	chr5:159686778-159707532	-0.400978
TMEM175	ENSG00000127419	chr4:946238-946978	-0.410898
YJEFN3	ENSG00000250067	chr19:19646488-19648128	-0.362653
NT5C3B	ENSG00000141698	chr17:39991524-39992111	-0.177748
SHISA5	ENSG00000164054	chr3:48511242-48514843	-0.307198
SLC48A1	ENSG00000211584	chr12:48176000-48176001	0.277727
PHPT1	ENSG00000054148	chr9:139744954-139744955	0.431186
PIKFYVE	ENSG00000115020	chr2:209169042-209176960	-0.154926
RREB1	ENSG00000124782	chr6:7240835-7246657	0.57473
LTBR	ENSG00000111321	chr12:6495610-6497564	-0.315107
RIPK2	ENSG00000104312	chr8:90770461-90777569	0.248554
LINC00963	ENSG00000204054	chr9:132253407-132255698	-0.2495
C20orf196	ENSG00000171984	chr20:5753689-5843670	0.111127
DCAKD	ENSG00000172992	chr17:43111410-43111555	0.628035
FAM160B1	ENSG00000151553	chr10:116621093-116621194	-0.365108
NDUFAF1	ENSG00000137806	chr15:41689338-41694342	0.271549
ADGRB2	ENSG00000121753	chr1:32202324-32203030	-0.403491
ITGA2B	ENSG00000005961	chr17:42451838-42452027	0.413199
PHF12	ENSG00000109118	chr17:27251320-27254009	-0.312934
WDR44	ENSG00000131725	chrX:117566857-117575331	0.196541
HOMEZ	ENSG00000215271	chr14:23746396-23755122	-0.368322
KIAA0195	ENSG00000177728	chr17:73488418-73488555	0.247443
FAM95C	ENSG00000273036	chr9:38540846-38542309	0.254393
NCOR1	ENSG00000141027	chr17:16052831-16055260	-0.381219
PELI3	ENSG00000174516	chr11:66235751-66238713	0.358347
ENSG00000203827	ENSG00000203827	chr1:148745964-148751038	0.486778
L3HYPDH	ENSG00000126790	chr14:59941244-59941245	-0.323983
U2AF1L4	ENSG00000161265	chr19:36235593-36236026	-0.266957
SARS2	ENSG00000104835	chr19:39435744-39437112	-0.328604
GALT	ENSG00000213930	chr9:34650138-34650366	0.197775
NDEL1	ENSG00000166579	chr17:8366672-8370248	-0.184546
RGS19	ENSG00000171700	chr20:62707999-62711226	-0.30954
CPSF4	ENSG00000160917	chr7:99051663-99051664	0.196522
TAZ	ENSG00000102125	chrX:153641904-153642438	-0.229463
FOCAD	ENSG00000188352	chr9:20658825-20715321	-0.182259
ARVCF	ENSG00000099889	chr22:19960840-19961166	-0.291372
NR1H3	ENSG00000025434	chr11:47280810-47280912	0.354148
PIGO	ENSG00000165282	chr9:35095973-35096152	0.498096
TCIRG1	ENSG00000110719	chr11:67810789-67810790	0.177455
SRSF10	ENSG00000188529	chr1:24303943-24304401	0.343102
MITD1	ENSG00000158411	chr2:99787892-99787973	-0.148627
ZMYM4	ENSG00000146463	chr1:35761589-35790961	0.362179
RTEL1-TNFRSF6B	ENSG00000026036	chr20:62317225-62317357	0.460443
MAP4K4	ENSG00000071054	chr2:102480513-102481392	0.272153
WDR18	ENSG00000065268	chr19:989895-990223	-0.396394
RP11-334C17.5	ENSG00000262580	chr17:78177764-78179132	-0.360661
LRRK1	ENSG00000154237	chr15:101588862-101589849	-0.204893
RP11-326C3.11	ENSG00000251661	chr11:318746-329983	-0.131109
RARS2	ENSG00000146282	chr6:88258364-88265126	-0.203367
MTIF3	ENSG00000122033	chr13:28014586-28019225	-0.144523
AGAP9	ENSG00000204172	chr10:47198808-47200161	0.206502
PKD2	ENSG00000118762	chr4:88986647-88986914	-0.205746
MPRIP	ENSG00000133030	chr17:17077389-17079740	0.200863
PKD2	ENSG00000118762	chr4:88986647-88986914	-0.210816
C10orf76	ENSG00000120029	chr10:103773781-103783234	-0.25275
MYO18A	ENSG00000196535	chr17:27422077-27423779	-0.424707
TMEM132A	ENSG00000006118	chr11:60701216-60701960	-0.273062
ZNF385A	ENSG00000161642	chr12:54769738-54772850	-0.381843
AC007246.3	ENSG00000231312	chr2:39745851-39826506	-0.436302
PABPC1L	ENSG00000101104	chr20:43561175-43561698	0.581862
EXOC7	ENSG00000182473	chr17:74085401-74090495	0.216189
SYP	ENSG00000102003	chrX:49049920-49055427	0.285837
AXIN1	ENSG00000103126	chr16:341297-343488	-0.169739
NUPL1	ENSG00000139496	chr13:25883420-25887021	-0.223539
DDR1	ENSG00000204580	chr6:30853457-30856465	-0.241574
FUK	ENSG00000157353	chr16:70508242-70508431	-0.344373
SPACA6P	ENSG00000182310	chr19:52204979-52205220	0.209444
TBC1D31	ENSG00000156787	chr8:124142573-124146354	-0.23596
USH1C	ENSG00000006611	chr11:17515923-17518305	-0.185052
CCDC101	ENSG00000176476	chr16:28602256-28602362	0.47253
PRPF40B	ENSG00000110844	chr12:50025708-50026638	0.247344
STAG3L1	ENSG00000205583	chr7:74995707-74996018	0.141268
PPCDC	ENSG00000138621	chr15:75335877-75336727	-0.250744
TPCN2	ENSG00000162341	chr11:68847351-68848868	-0.31158
ENO3	ENSG00000108515	chr17:4855209-4856090	-0.246354
UROS	ENSG00000188690	chr10:127477574-127477852	0.351166
MAPK12	ENSG00000188130	chr22:50695622-50696672	-0.581513
PPP1R3F	ENSG00000049769	chrX:49138526-49155754	-0.2938
ANKRD17	ENSG00000132466	chr4:73968264-73979509	-0.278963
SFI1	ENSG00000198089	chr22:32007826-32009128	-0.297395
PHKA1	ENSG00000067177	chrX:71840751-71842959	0.169789
PROC	ENSG00000115718	chr2:128180984-128185933	0.360781
GAS2L1	ENSG00000185340	chr22:29703143-29706429	0.371589
PDCD6IPP2	ENSG00000261377	chr15:29083968-29101279	0.335243
C14orf159	ENSG00000133943	chr14:91690139-91691028	0.254621
SLC22A18	ENSG00000110628	chr11:2940637-2943332	-0.209537
VSIG10	ENSG00000176834	chr12:118540975-118541398	0.368682
PSMF1	ENSG00000125818	chr20:1146870-1146871	0.353876
DAB2IP	ENSG00000136848	chr9:124522718-124525784	-0.367067
C6orf62	ENSG00000112308	chr6:24710817-24714546	0.198379
SGSH	ENSG00000181523	chr17:78181484-78185870	0.570515
CAPN7	ENSG00000131375	chr3:15283760-15287033	0.197384
POU6F1	ENSG00000184271	chr12:51592558-51593530	0.385138
TCF25	ENSG00000141002	chr16:89940267-89949759	-0.428031
DCLK2	ENSG00000170390	chr4:151170836-151177172	-0.377449
RARS2	ENSG00000146282	chr6:88279308-88299640	-0.225263
ENTHD2	ENSG00000167302	chr17:79205821-79206115	0.228999
ZNF251	ENSG00000198169	chr8:145979706-145979707	0.309629
RIN3	ENSG00000100599	chr14:93107674-93125506	0.219265
WASF1	ENSG00000112290	chr6:110448832-110499801	0.31435
TACC2	ENSG00000138162	chr10:123872748-123954555	-0.17795
IMMP1L	ENSG00000148950	chr11:31484852-31531066	-0.239203
NT5C3B	ENSG00000141698	chr17:39992209-39992434	-0.227651
LIPE-AS1	ENSG00000213904	chr19:42901376-42912410	-0.163854
TRIOBP	ENSG00000100106	chr22:38155271-38161677	-0.417757
L3MBTL2	ENSG00000100395	chr22:41610030-41612143	-0.759488
SREBF1	ENSG00000072310	chr17:17720771-17721010	-0.177725
HM13	ENSG00000101294	chr20:30154098-30156923	-0.203988
FUK	ENSG00000157353	chr16:70500857-70501277	-0.468654
MED25	ENSG00000104973	chr19:50339663-50341837	-0.245662
MYO5C	ENSG00000128833	chr15:52488680-52497062	-0.290951
RBFOX3	ENSG00000167281	chr17:77100208-77102733	-0.342938
IGSF3	ENSG00000143061	chr1:117146647-117150564	-0.240407
RP11-206L10.2	ENSG00000228327	chr1:709660-713939	-0.26594
FBXO46	ENSG00000177051	chr19:46216831-46226731	-0.265131
TOR2A	ENSG00000160404	chr9:130494557-130494843	-0.225364
PDGFA	ENSG00000197461	chr7:538211-540753	-0.267418
ENO3	ENSG00000108515	chr17:4855442-4856090	0.164673
HNRNPM	ENSG00000099783	chr19:8548095-8550487	-0.228852
RBM48	ENSG00000127993	chr7:92164284-92166165	-0.317087
C17orf61-PLSCR3	ENSG00000262481	chr17:7296271-7296463	-0.273614
KIAA1217	ENSG00000120549	chr10:24825822-24831622	0.34243
TMEM39B	ENSG00000121775	chr1:32560572-32561261	0.309054
MANEAL	ENSG00000185090	chr1:38261518-38262416	-0.257663
TMUB2	ENSG00000168591	chr17:42266667-42266792	0.32617
LRRC75A-AS1	ENSG00000175061	chr17:16343017-16343499	0.234081
RP11-432B6.3	ENSG00000248710	chr3:159986324-159995094	-0.215286
KIFC3	ENSG00000140859	chr16:57806200-57828911	0.231086
AHSA2	ENSG00000173209	chr2:61412753-61413581	0.248433
LRRC23	ENSG00000010626	chr12:7019190-7023055	0.26899
NBPF1	ENSG00000219481	chr1:16915558-16918342	0.352208
GOLGA4	ENSG00000144674	chr3:37323763-37336470	0.236657
C17orf85	ENSG00000074356	chr17:3716379-3716380	-0.252306
SNX5	ENSG00000089006	chr20:17937681-17949018	-0.217698
IVNS1ABP	ENSG00000116679	chr1:185275757-185276146	0.124168
GYS1	ENSG00000104812	chr19:49494740-49496252	-0.517836
KBTBD3	ENSG00000182359	chr11:105929836-105948039	0.311789
MRPS18C	ENSG00000163319	chr4:84378111-84379499	0.205746
C1orf52	ENSG00000162642	chr1:85724744-85725041	-0.324237
PSMA3-AS1	ENSG00000257621	chr14:58740355-58740356	-0.1733
OSMR	ENSG00000145623	chr5:38919164-38921717	-0.329731
RPP40	ENSG00000124787	chr6:4999075-5000043	-0.412319
DUXAP9	ENSG00000225210	chr14:19650126-19652244	-0.243796
ENTHD2	ENSG00000167302	chr17:79211259-79212786	-0.42285
KIAA0895L	ENSG00000196123	chr16:67214569-67217165	0.358309
MMS22L	ENSG00000146263	chr6:97681856-97694504	-0.337483
SUV420H2	ENSG00000133247	chr19:55853414-55854110	-0.32141
MARK3	ENSG00000075413	chr14:103958371-103966493	0.383678
PPP1R9A	ENSG00000158528	chr7:94913528-94915518	0.342519
MIR22HG	ENSG00000186594	chr17:1617308-1619424	-0.411373
XRCC3	ENSG00000126215	chr14:104169664-104173340	-0.272192
ZKSCAN8	ENSG00000198315	chr6:28109807-28112109	0.275998
NUPL1	ENSG00000139496	chr13:25883420-25887752	0.183402
CENPBD1P1	ENSG00000213753	chr19:59086955-59092612	-0.186687
DLX4	ENSG00000108813	chr17:48047115-48050437	-0.407996
LRRC23	ENSG00000010626	chr12:6993083-7015573	0.309235
U2AF1L4	ENSG00000161265	chr19:36235322-36236026	-0.257007
RCC1	ENSG00000180198	chr1:28843379-28856370	-0.318649
SHC1	ENSG00000160691	chr1:154946521-154946724	0.68785
ARFGAP1	ENSG00000101199	chr20:61912699-61914171	-0.307129
FBXO22	ENSG00000167196	chr15:76196970-76205544	-0.260497
ENOSF1	ENSG00000132199	chr18:678737-683246	-0.178421
IQCB1	ENSG00000173226	chr3:121507279-121508920	-0.2147
PPIEL	ENSG00000243970	chr1:40014623-40018790	-0.333389
TRPM2	ENSG00000142185	chr21:45846619-45855014	0.275482
ENSG00000182646	ENSG00000182646	chrX:52986285-52986286	0.209332
STX2	ENSG00000111450	chr12:131293249-131297502	-0.250057
PRAME	ENSG00000185686	chr22:22893511-22899232	-0.215305
GORAB	ENSG00000120370	chr1:170501425-170508351	0.161783
PIP5K1A	ENSG00000143398	chr1:151212515-151214599	-0.190033
MEF2A	ENSG00000068305	chr15:100211659-100214598	-0.260446
DCAF10	ENSG00000122741	chr9:37854979-37857238	-0.32254
DHRS4-AS1	ENSG00000215256	chr14:24410367-24422983	-0.26937
PHACTR4	ENSG00000204138	chr1:28733974-28785596	0.125853
KSR1	ENSG00000141068	chr17:25944454-25965289	0.309437
MOK	ENSG00000080823	chr14:102718332-102729883	-0.419778
FAM160B2	ENSG00000158863	chr8:21960696-21960885	0.680187
ODF2	ENSG00000136811	chr9:131221936-131222792	-0.183011
MSANTD2	ENSG00000120458	chr11:124637924-124642890	-0.237571
EIF4H	ENSG00000106682	chr7:73604248-73609071	-0.221959
CD151	ENSG00000177697	chr11:834591-836063	0.171275
NAPA	ENSG00000105402	chr19:47991147-47991492	0.192978
DMKN	ENSG00000161249	chr19:35996667-35996841	-0.205601
RPL17	ENSG00000265681	chr18:47018203-47018828	-0.283752
NAT1	ENSG00000171428	chr8:18067689-18076920	-0.573851
RBM41	ENSG00000089682	chrX:106312632-106331666	0.199553
TRAPPC6B	ENSG00000182400	chr14:39623498-39627489	-0.235761
NDE1	ENSG00000072864	chr16:15790717-15793586	-0.516016
SPTAN1	ENSG00000197694	chr9:131314975-131329017	-0.263962
FAM160B2	ENSG00000158863	chr8:21959362-21959686	-0.391128
C9orf16	ENSG00000171159	chr9:130922765-130925722	-0.254501
LMO7	ENSG00000136153	chr13:76378677-76383290	-0.176147
GUSB	ENSG00000169919	chr7:65439691-65441002	0.249476
OFD1	ENSG00000046651	chrX:13769487-13771487	-0.320349
BICC1	ENSG00000122870	chr10:60580228-60588521	-0.113067
TOP3B	ENSG00000100038	chr22:22311967-22312864	-0.234846
POMT1	ENSG00000130714	chr9:134379727-134381501	-0.281882
ATP6V1B1	ENSG00000116039	chr2:71187208-71188051	-0.424187
TMEM156	ENSG00000121895	chr4:39034063-39034262	-0.275765
DNMT3B	ENSG00000088305	chr20:31372665-31374308	0.216767
CROCCP2	ENSG00000215908	chr1:16952994-16953640	-0.129382
NCOR2	ENSG00000196498	chr12:124857156-124862783	0.316591
ADSSL1	ENSG00000185100	chr14:105211246-105212573	-0.267909
IFT27	ENSG00000100360	chr22:37160080-37163350	0.47184
AMBRA1	ENSG00000110497	chr11:46564531-46564532	0.123986
HAUS5	ENSG00000249115	chr19:36110660-36110914	-0.243245
G6PC3	ENSG00000141349	chr17:42148551-42151528	-0.183131
ST6GAL2	ENSG00000144057	chr2:107423405-107446522	-0.380803
DOCK9	ENSG00000088387	chr13:99476758-99479084	-0.307977
ZSCAN5A	ENSG00000131848	chr19:56824753-56825619	0.361502
RAB11FIP2	ENSG00000107560	chr10:119765349-119765350	-0.210846
KRT80	ENSG00000167767	chr12:52574392-52574687	-0.489042
ANKRD54	ENSG00000100124	chr22:38229762-38234507	-0.251923
TCOF1	ENSG00000070814	chr5:149769586-149771520	-0.241544
FAM229B	ENSG00000203778	chr6:112408923-112420473	0.266898
SLC35C2	ENSG00000080189	chr20:44983880-44984441	-0.259946
FNBP4	ENSG00000109920	chr11:47746330-47747289	0.29857
MEIS3	ENSG00000105419	chr19:47918123-47918308	0.194575
TRAF4	ENSG00000076604	chr17:27071273-27074231	-0.195724
BIN3	ENSG00000147439	chr8:22488091-22494435	0.188367
EEPD1	ENSG00000122547	chr7:36278645-36320724	-0.282009
HIATL2	ENSG00000196312	chr9:99696197-99711837	0.616612
STAT6	ENSG00000166888	chr12:57496704-57498247	-0.521296
G2E3	ENSG00000092140	chr14:31028478-31050282	-0.279294
AHI1	ENSG00000135541	chr6:135606785-135621638	-0.201411
RABEP1	ENSG00000029725	chr17:5238639-5241314	-0.351913
MAPK8IP3	ENSG00000138834	chr16:1793936-1793937	-0.219495
PHC2	ENSG00000134686	chr1:33790620-33794471	-0.237586
MARK3	ENSG00000075413	chr14:103958371-103969219	0.283463
ATP5J2	ENSG00000241468	chr7:99056886-99057709	-0.187414
PTPRF	ENSG00000142949	chr1:44058272-44064391	0.304326
MYO5C	ENSG00000128833	chr15:52497344-52498013	-0.236902
2019-09-06	ENSG00000125354	chrX:118759342-118763281	-0.348666
LRRC37B	ENSG00000185158	chr17:30372837-30374780	-0.329547
VEGFA	ENSG00000112715	chr6:43749824-43752278	-0.224491
SNX14	ENSG00000135317	chr6:86246642-86251703	-0.246191
TMEM104	ENSG00000109066	chr17:72815982-72832066	-0.521452
DOCK6	ENSG00000130158	chr19:11311728-11312565	-0.232322
C1orf159	ENSG00000131591	chr1:1018367-1019733	-0.26389
IFT140	ENSG00000187535	chr16:1573957-1574553	-0.239667
EPB41L4A	ENSG00000129595	chr5:111540185-111564369	-0.365997
USP33	ENSG00000077254	chr1:78207433-78211106	-0.23136
AGTPBP1	ENSG00000135049	chr9:88270235-88272350	-0.298764
ASIC1	ENSG00000110881	chr12:50474372-50474885	-0.396982
LRCH3	ENSG00000186001	chr3:197598333-197600220	0.208749
SGCB	ENSG00000163069	chr4:52898127-52899597	0.247414
IPO8	ENSG00000133704	chr12:30839593-30843430	0.361141
RSU1	ENSG00000148484	chr10:16859083-16859314	-0.195819
CD46	ENSG00000117335	chr1:207940540-207943666	-0.226919
CPNE2	ENSG00000140848	chr16:57180233-57181463	-0.429673
SDHAP2	ENSG00000215837	chr3:195408537-195410623	-0.383269
SDHAP3	ENSG00000185986	chr5:1578536-1579392	0.315505
AP5Z1	ENSG00000242802	chr7:4825315-4825632	0.557831
PI4KB	ENSG00000143393	chr1:151288985-151298648	-0.337028
TANK	ENSG00000136560	chr2:162017923-162036125	-0.445777
PICK1	ENSG00000100151	chr22:38469099-38469578	0.177617
PLEKHA5	ENSG00000052126	chr12:19498822-19501333	-0.433219
ZNF280D	ENSG00000137871	chr15:56935195-56946396	-0.370406
MDM2	ENSG00000135679	chr12:69202271-69202988	-0.120329
ZNF189	ENSG00000136870	chr9:104161471-104161677	0.212219
TM2D2	ENSG00000169490	chr8:38852924-38853732	-0.220517
FAM86DP	ENSG00000244026	chr3:75475750-75481959	0.24429
DENND5A	ENSG00000184014	chr11:9167362-9171628	0.278015
METTL14	ENSG00000145388	chr4:119625206-119631153	0.212232
CROCC	ENSG00000058453	chr1:17297262-17297960	-0.343681
PPP1R3E	ENSG00000235194	chr14:23765469-23765470	-0.271189
FBXO44	ENSG00000132879	chr1:11715009-11715385	0.512367
WDR27	ENSG00000184465	chr6:170013752-170033043	0.243195
ENSG00000185128	ENSG00000185128	chr17:36285864-36287148	-0.32944
CBWD1	ENSG00000172785	chr9:177820-178816	0.34449
NEDD4L	ENSG00000049759	chr18:56001124-56008270	-0.169078
ITPR3	ENSG00000096433	chr6:33638592-33638942	-0.234405
SCN9A	ENSG00000169432	chr2:167158810-167159600	0.52626
CEACAM1	ENSG00000079385	chr19:43015072-43015728	-0.28254
SPATS2L	ENSG00000196141	chr2:201284219-201305372	-0.190782
NPRL3	ENSG00000103148	chr16:167374-169125	-0.414142
AP1B1	ENSG00000100280	chr22:29755948-29758990	-0.184165
NSUN5P1	ENSG00000223705	chr7:75039743-75039889	-0.393054
TASP1	ENSG00000089123	chr20:13568017-13604093	-0.366155
CTD-2020K17.1	ENSG00000267121	chr17:43298281-43298716	-0.270548
DPY19L1P1	ENSG00000229358	chr7:32678977-32695599	-0.286932
CD47	ENSG00000196776	chr3:107766139-107770786	-0.260797
SYTL2	ENSG00000137501	chr11:85425550-85428526	-0.329286
DMPK	ENSG00000104936	chr19:46283127-46285451	-0.275323
MAP3K3	ENSG00000198909	chr17:61769222-61769602	-0.233151
FLNA	ENSG00000196924	chrX:153583440-153585802	0.275336
LINC01278	ENSG00000235437	chrX:62652371-62780712	-0.277346
NRM	ENSG00000137404	chr6:30656719-30657053	-0.282336
DDX59	ENSG00000118197	chr1:200635879-200638895	-0.212364
TROAP	ENSG00000135451	chr12:49717820-49719284	-0.222816
CELSR1	ENSG00000075275	chr22:46759144-46759893	-0.315699
FAM193B	ENSG00000146067	chr5:176965108-176965309	0.518342
CLCN6	ENSG00000011021	chr1:11888276-11889253	0.278118
TACC1	ENSG00000147526	chr8:38614927-38682826	-0.239655
SEC31A	ENSG00000138674	chr4:83750211-83752090	0.34594
NECAP2	ENSG00000157191	chr1:16767348-16770127	-0.475927
MTSS1L	ENSG00000132613	chr16:70708335-70710784	-0.250535
PLEKHA6	ENSG00000143850	chr1:204192713-204197211	-0.428903
RRBP1	ENSG00000125844	chr20:17641173-17662673	-0.222344
MYNN	ENSG00000085274	chr3:169492349-169496556	-0.112244
VTI1A	ENSG00000151532	chr10:114207225-114208640	0.432628
SNRPA1	ENSG00000131876	chr15:101827907-101832167	-0.195524
PTK2B	ENSG00000120899	chr8:27301788-27308266	0.17822
WDR27	ENSG00000184465	chr6:170002417-170033043	-0.264817
DIS3L2	ENSG00000144535	chr2:233200584-233201179	-0.294605
ARMCX6	ENSG00000198960	chrX:100871202-100871203	-0.128889
MRPL43	ENSG00000055950	chr10:102746329-102746444	0.203067
ZCCHC10	ENSG00000155329	chr5:132358598-132362189	0.228274
PANK1	ENSG00000152782	chr10:91353077-91359009	0.300543
PRPF3	ENSG00000117360	chr1:150318612-150318884	-0.220337
C19orf83	ENSG00000267757	chr19:46145024-46145137	0.423559
MITD1	ENSG00000158411	chr2:99788109-99790378	-0.231408
IFT81	ENSG00000122970	chr12:110562248-110565165	-0.291528
TTLL3	ENSG00000214021	chr3:9871079-9876365	0.192166
SLC26A11	ENSG00000181045	chr17:78219055-78219953	-0.209551
POLG2	ENSG00000256525	chr17:62479116-62481845	-0.326567
MMAB	ENSG00000139428	chr12:109998909-109999225	-0.391969
DCAF15	ENSG00000132017	chr19:14063456-14063842	0.342558
BAG6	ENSG00000204463	chr6:31607003-31607976	-0.213485
IFT140	ENSG00000187535	chr16:1573957-1574553	-0.33455
SYCP2L	ENSG00000153157	chr6:10956475-10961538	0.302143
AMZ2P1	ENSG00000214174	chr17:62969635-62971069	0.228557
MOB3A	ENSG00000172081	chr19:2078678-2096225	0.250676
BIVM-ERCC5	ENSG00000270181	chr13:103468904-103473387	-0.223746
UCKL1	ENSG00000198276	chr20:62576087-62577004	-0.19287
TMEM175	ENSG00000127419	chr4:941680-941681	0.228585
MEF2A	ENSG00000068305	chr15:100106309-100138635	-0.181565
RBM27	ENSG00000091009	chr5:145640461-145643054	0.212067
TOP3B	ENSG00000100038	chr22:22324778-22326249	-0.301521
PDE8A	ENSG00000073417	chr15:85610435-85619093	-0.190381
DSCR3	ENSG00000157538	chr21:38612940-38639539	-0.201298
NRM	ENSG00000137404	chr6:30657229-30657824	-0.213322
BRD1	ENSG00000100425	chr22:50181142-50187682	-0.373776
IVD	ENSG00000128928	chr15:40707681-40708277	-0.287104
RP11-632K20.7	ENSG00000223509	chr15:32815414-32816672	0.33997
BCORL1	ENSG00000085185	chrX:129139293-129144484	0.387794
ATG16L1	ENSG00000085978	chr2:234181698-234182367	-0.241516
PRPF40B	ENSG00000110844	chr12:50025708-50026638	0.319298
PIP5K1A	ENSG00000143398	chr1:151214745-151214914	-0.214751
TANK	ENSG00000136560	chr2:161993574-162036125	-0.113196
PRPF31	ENSG00000105618	chr19:54625322-54625876	-0.229849
TPCN2	ENSG00000162341	chr11:68846488-68847302	-0.479623
ACSF3	ENSG00000176715	chr16:89180895-89187209	-0.617712
FDPS	ENSG00000160752	chr1:155278756-155279834	-0.194343
GALNT7	ENSG00000109586	chr4:174219128-174223198	-0.229351
NUDT2	ENSG00000164978	chr9:34329597-34338711	0.195763
CRYZ	ENSG00000116791	chr1:75172678-75175782	0.245946
STX2	ENSG00000111450	chr12:131293249-131297502	-0.282108
BRCA1	ENSG00000012048	chr17:41243049-41246761	0.21973
BAG6	ENSG00000204463	chr6:31612191-31612302	0.312581
KIAA0586	ENSG00000100578	chr14:58925263-58927704	0.170094
NASP	ENSG00000132780	chr1:46072263-46078841	0.197322
RNH1	ENSG00000023191	chr11:502181-506609	0.191481
LRP8	ENSG00000157193	chr1:53723136-53723991	0.33419
SNHG16	ENSG00000163597	chr17:74553939-74557370	0.239524
AP1B1	ENSG00000100280	chr22:29757400-29758990	0.195876
AKR1E2	ENSG00000165568	chr10:4878001-4884613	0.23587
MMD	ENSG00000108960	chr17:53491593-53499031	-0.333009
NQO2	ENSG00000124588	chr6:3012908-3017118	0.199606
TCEB2	ENSG00000103363	chr16:2821605-2821606	0.243648
FBXO44	ENSG00000132879	chr1:11718421-11718793	-0.159594
C9orf85	ENSG00000155621	chr9:74562028-74586421	-0.258143
GTPBP6	ENSG00000178605	chrX:228294-229433	-0.19072
ENSG00000182217	ENSG00000182217	chr1:149831245-149832268	0.336521
ALS2CL	ENSG00000178038	chr3:46713258-46713374	0.255363
NPLOC4	ENSG00000182446	chr17:79530942-79530943	-0.14416
YWHAZ	ENSG00000164924	chr8:101961128-101965497	-0.184372
UROS	ENSG00000188690	chr10:127477574-127483449	-0.239194
LRP3	ENSG00000130881	chr19:33695758-33696152	-0.205337
ARHGEF7	ENSG00000102606	chr13:111938587-111940701	-0.316906
TTL	ENSG00000114999	chr2:113251952-113258783	-0.431024
PLA2G6	ENSG00000184381	chr22:38522456-38522769	0.296332
PVT1	ENSG00000249859	chr8:129001537-129021836	-0.164263
ENSG00000185128	ENSG00000185128	chr17:36287187-36287670	-0.326308
ARMC7	ENSG00000125449	chr17:73106701-73124772	-0.307433
TRAIP	ENSG00000183763	chr3:49879980-49881234	-0.233359
SEC31A	ENSG00000138674	chr4:83765662-83766354	0.172847
MYCBP2	ENSG00000005810	chr13:77673148-77695508	-0.623096
SLC12A5	ENSG00000124140	chr20:44650525-44652008	0.238287
ENSG00000243452	ENSG00000243452	chr1:148568877-148577358	-0.41265
PARPBP	ENSG00000185480	chr12:102572548-102576327	-0.322838
LPIN3	ENSG00000132793	chr20:39986087-39986522	-0.30512
SETMAR	ENSG00000170364	chr3:4345210-4354582	0.46661
PRPF3	ENSG00000117360	chr1:150298339-150300779	-0.55422
ZNF514	ENSG00000144026	chr2:95819004-95823096	-0.599891
NQO2	ENSG00000124588	chr6:3000319-3006702	-0.248621
C1RL-AS1	ENSG00000205885	chr12:7273221-7274841	0.313092
FAM114A1	ENSG00000197712	chr4:38869455-38879692	-0.513593
AFMID	ENSG00000183077	chr17:76201599-76201684	0.271669
ZER1	ENSG00000160445	chr9:131517938-131534094	-0.203541
CA11	ENSG00000063180	chr19:49141401-49142145	-0.213773
BDKRB2	ENSG00000168398	chr14:96703518-96706740	-0.424601
CAV2	ENSG00000105971	chr7:116140501-116146025	-0.153026
METTL22	ENSG00000067365	chr16:8722967-8728896	-0.284282
MICAL1	ENSG00000135596	chr6:109772903-109773449	-0.411635
MAZ	ENSG00000103495	chr16:29820062-29821398	-0.417466
METRN	ENSG00000103260	chr16:766715-766933	0.235812
NPAS2	ENSG00000170485	chr2:101549463-101554215	-0.650925
PRRT1	ENSG00000204314	chr6:32120949-32121514	-0.703582
FLCN	ENSG00000154803	chr17:17135196-17136102	-0.44221
TBX3	ENSG00000135111	chr12:115117456-115117718	0.232331
SDHAP1	ENSG00000185485	chr3:195686957-195690171	-0.298459
RMI1	ENSG00000178966	chr9:86595919-86614624	0.220543
PC	ENSG00000173599	chr11:66620307-66631245	0.580256
KIAA0907	ENSG00000132680	chr1:155884111-155885664	-0.125372
CACTIN	ENSG00000105298	chr19:3619240-3620125	-0.217304
LENG8	ENSG00000167615	chr19:54969700-54969701	0.210203
SCML2	ENSG00000102098	chrX:18259499-18260559	0.405636
NINL	ENSG00000101004	chr20:25470621-25470872	0.205937
SIRPA	ENSG00000198053	chr20:1896101-1902041	-0.373022
AARSD1	ENSG00000266967	chr17:41103911-41106893	0.228114
TM2D2	ENSG00000169490	chr8:38852924-38852925	0.233701
ADCY6	ENSG00000174233	chr12:49168837-49169086	-0.306065
ZNF675	ENSG00000197372	chr19:23837508-23844916	-0.307814
CHN1	ENSG00000128656	chr2:175711685-175742568	-0.237831
RP11-195F19.5	ENSG00000187186	chr9:34665187-34665311	-0.244981
ASL	ENSG00000126522	chr7:65541080-65546790	-0.268304
ANKLE2	ENSG00000176915	chr12:133310657-133310971	0.111681
SPG11	ENSG00000104133	chr15:44892830-44897001	0.29914
CKLF	ENSG00000217555	chr16:66586696-66592093	0.227276
GDPD5	ENSG00000158555	chr11:75161028-75167802	-0.663393
LHFPL2	ENSG00000145685	chr5:77784976-77805607	-0.404759
MFSD12	ENSG00000161091	chr19:3538754-3544807	-0.424616
RAB4A	ENSG00000168118	chr1:229407117-229422233	-0.229354
ENSG00000203849	ENSG00000203849	chr1:142699432-142705706	0.180837
LINC01128	ENSG00000228794	chr1:764484-787307	0.318999
SLC22A18AS	ENSG00000254827	chr11:2909865-2924689	-0.286691
RBMX	ENSG00000147274	chrX:135954504-135955405	-0.374356
FNBP4	ENSG00000109920	chr11:47746330-47752926	-0.441209
UCKL1	ENSG00000198276	chr20:62572561-62575006	-0.344616
PLEKHA6	ENSG00000143850	chr1:204226016-204226481	0.283915
PIGF	ENSG00000151665	chr2:46808730-46819614	-0.223592
ENSG00000108272	ENSG00000108272	chr17:34948586-34951401	-0.414969
TGFBR2	ENSG00000163513	chr3:30648469-30686239	-0.222332
RALGPS2	ENSG00000116191	chr1:178858831-178863054	-0.319921
ERI2	ENSG00000196678	chr16:20809533-20810585	0.106693
KHSRP	ENSG00000088247	chr19:6414131-6415152	-0.330675
PDDC1	ENSG00000177225	chr11:771426-772427	-0.328014
GPC2	ENSG00000213420	chr7:99772388-99773830	0.537867
VEGFB	ENSG00000173511	chr11:64004694-64004993	-0.18311
HIATL2	ENSG00000196312	chr9:99696197-99711837	0.289777
KIAA1109	ENSG00000138688	chr4:123236843-123237503	0.435879
SGSM2	ENSG00000141258	chr17:2265564-2266132	-0.479961
EPB41L5	ENSG00000115109	chr2:120858390-120861636	0.319424
SH2D3A	ENSG00000125731	chr19:6753116-6753467	0.195133
GLG1	ENSG00000090863	chr16:74486029-74487069	-0.190138
KCTD13	ENSG00000174943	chr16:29917887-29922299	0.295136
STX1A	ENSG00000106089	chr7:73119554-73122919	-0.31945
B4GALT3	ENSG00000158850	chr1:161146369-161147213	-0.547638
DDX60L	ENSG00000181381	chr4:169312795-169317110	0.226323
CRELD1	ENSG00000163703	chr3:9985199-9986049	-0.405203
SPIRE2	ENSG00000204991	chr16:89936090-89936458	-0.197897
PANK1	ENSG00000152782	chr10:91353746-91359009	-0.264858
HEATR6	ENSG00000068097	chr17:58151247-58153491	-0.440824
GNPDA2	ENSG00000163281	chr4:44705159-44709769	-0.325495
FOXRED2	ENSG00000100350	chr22:36900414-36900562	-0.256588
CLASP1	ENSG00000074054	chr2:122166623-122168442	0.440233
RPRD2	ENSG00000163125	chr1:150444358-150444359	0.162881
PTPN4	ENSG00000088179	chr2:120674266-120677645	0.333007
ASXL1	ENSG00000171456	chr20:30956926-31015931	-0.178095
COL27A1	ENSG00000196739	chr9:117031574-117033008	-0.617594
CDCA7	ENSG00000144354	chr2:174228623-174228728	0.178647
ARFGAP1	ENSG00000101199	chr20:61912699-61914171	-0.268167
RP4-800G7.2	ENSG00000244560	chr7:148990583-148990842	-0.176152
NPRL3	ENSG00000103148	chr16:162774-167300	-0.502077
HAUS5	ENSG00000249115	chr19:36110660-36110914	-0.244163
KRT7	ENSG00000135480	chr12:52626575-52631034	0.479957
KCNAB2	ENSG00000069424	chr1:6086505-6100577	-0.362612
CKLF	ENSG00000217555	chr16:66592251-66599789	0.276792
ASIC3	ENSG00000213199	chr7:150747695-150747696	0.237762
RPL28	ENSG00000108107	chr19:55899416-55914311	-0.258164
TIA1	ENSG00000116001	chr2:70456223-70456396	-0.22133
RWDD2A	ENSG00000013392	chr6:83904990-83905314	0.468155
THOC2	ENSG00000125676	chrX:122735189-122744769	-0.212156
PKD1P6	ENSG00000250251	chr16:15229058-15229137	-0.345827
DMXL2	ENSG00000104093	chr15:51743894-51745747	-0.147396
C9orf156	ENSG00000136932	chr9:100678620-100684700	-0.371944
HAGHL	ENSG00000103253	chr16:777614-777965	-0.115842
LINC00152	ENSG00000222041	chr2:87882865-87906112	-0.286398
VAPB	ENSG00000124164	chr20:56993419-57009658	-0.244361
METTL22	ENSG00000067365	chr16:8733019-8733220	0.377189
USP33	ENSG00000077254	chr1:78207433-78225328	0.249381
MAP4	ENSG00000047849	chr3:47894529-47894653	-0.290671
BRF1	ENSG00000185024	chr14:105695250-105718844	0.207683
TOP3B	ENSG00000100038	chr22:22330179-22337127	-0.319987
UTRN	ENSG00000152818	chr6:145142154-145148747	0.268833
URI1	ENSG00000105176	chr19:30506138-30506443	0.190875
KIFC3	ENSG00000140859	chr16:57819578-57822487	-0.16924
C16orf13	ENSG00000130731	chr16:685063-685064	0.263894
PI4KB	ENSG00000143393	chr1:151297393-151298648	0.385746
SUV420H1	ENSG00000110066	chr11:67926638-67934449	-0.258782
IFT80	ENSG00000068885	chr3:159986324-159995094	-0.212345
MRPS12	ENSG00000128626	chr19:39421811-39421916	0.190129
ASMTL	ENSG00000169093	chrX:1538007-1540551	-0.499524
PHF12	ENSG00000109118	chr17:27251320-27254009	-0.284363
BPTF	ENSG00000171634	chr17:65955991-65960328	0.251916
NOC2L	ENSG00000188976	chr1:889462-889844	0.21606
RBM27	ENSG00000091009	chr5:145640461-145641073	-0.254273
SETD5	ENSG00000168137	chr3:9470693-9475529	-0.142244
LRRC27	ENSG00000148814	chr10:134151199-134155717	-0.441747
FAM118A	ENSG00000100376	chr22:45719308-45726484	-0.268278
ARL14EP	ENSG00000152219	chr11:30344749-30354413	0.274738
GUCD1	ENSG00000138867	chr22:24939065-24939810	-0.229533
AC226119.5	ENSG00000253917	chr4:3952946-3954838	-0.403079
BAZ2B	ENSG00000123636	chr2:160252345-160253856	0.371393
PDDC1	ENSG00000177225	chr11:767747-770679	0.3174
PDPK1	ENSG00000140992	chr16:2616454-2627426	-0.242877
C17orf85	ENSG00000074356	chr17:3725346-3728236	-0.236824
ZDHHC8P1	ENSG00000133519	chr22:23735020-23736113	-0.588352
PTPN6	ENSG00000111679	chr12:7060894-7061146	-0.254783
CA5BP1	ENSG00000186312	chrX:15706981-15720905	-0.371285
DIO3OS	ENSG00000258498	chr14:102025171-102031186	0.480555
CUL5	ENSG00000166266	chr11:107969256-107974917	-0.371853
ANXA6	ENSG00000197043	chr5:150490205-150496688	-0.380519
PPIP5K2	ENSG00000145725	chr5:102515889-102520373	-0.582396
ARMCX6	ENSG00000198960	chrX:100870750-100870751	-0.202123
ADAM15	ENSG00000143537	chr1:155033308-155034380	0.18084
NOD1	ENSG00000106100	chr7:30485840-30486583	-0.433333
SETD5	ENSG00000168137	chr3:9475634-9475729	0.186239
MGAT5B	ENSG00000167889	chr17:74942532-74943912	-0.493945
KIAA0141	ENSG00000081791	chr5:141318325-141319071	-0.258988
PC	ENSG00000173599	chr11:66620854-66631245	-0.679673
PANK1	ENSG00000152782	chr10:91371805-91404357	-0.275837
VMP1	ENSG00000062716	chr17:57915573-57915673	0.117891
ZNF213	ENSG00000085644	chr16:3187680-3188419	-0.315484
CBWD7	ENSG00000215126	chr9:42673528-42679435	-0.344158
ZFAND5	ENSG00000107372	chr9:74975703-74979612	-0.28282
INVS	ENSG00000119509	chr9:103054718-103055229	-0.208577
DNMT3A	ENSG00000119772	chr2:25470027-25470460	-0.206894
SPATA20	ENSG00000006282	chr17:48625128-48625644	-0.372586
SIM2	ENSG00000159263	chr21:38117437-38119966	-0.135403
RP11-475I24.3	ENSG00000237357	chr9:44402090-44403060	-0.323407
MAN2A2	ENSG00000196547	chr15:91446205-91446461	0.385986
CASP7	ENSG00000165806	chr10:115439108-115457253	-0.170869
WWC3	ENSG00000047644	chrX:9983898-10031485	-0.652174
GIT2	ENSG00000139436	chr12:110385309-110390897	0.358698
CTD-2354A18.1	ENSG00000261780	chr18:70999816-71016319	-0.241827
HSD11B1L	ENSG00000167733	chr19:5685130-5685313	0.119452
ZNF707	ENSG00000181135	chr8:144773883-144775841	-0.248657
UTRN	ENSG00000152818	chr6:145142154-145148484	-0.236153
ABHD14B	ENSG00000114779	chr3:52005908-52007981	0.353151
TMX2	ENSG00000213593	chr11:57505140-57505385	-0.241937
DCAKD	ENSG00000172992	chr17:43107547-43111555	-0.372339
PIEZO1	ENSG00000103335	chr16:88783619-88785982	-0.275456
AKR1C2	ENSG00000151632	chr10:5057426-5060092	0.294453
EGFR	ENSG00000146648	chr7:55225446-55227832	-0.20005
FBRS	ENSG00000156860	chr16:30671763-30672501	-0.187287
SLC12A5	ENSG00000124140	chr20:44650525-44652008	0.291275
SLC38A7	ENSG00000103042	chr16:58709958-58710193	-0.353551
MFI2-AS1	ENSG00000228109	chr3:196731230-196731365	0.280726
B4GALNT4	ENSG00000182272	chr11:380951-381669	-0.518968
MUM1	ENSG00000160953	chr19:1367219-1369264	-0.332566
CTC-360G5.8	ENSG00000269547	chr19:39435744-39437112	-0.292436
WASH1	ENSG00000181404	chr9:18492-24851	-0.248887
TEX22	ENSG00000226174	chr14:105915746-105916395	-0.396218
CD40	ENSG00000101017	chr20:44755340-44756777	-0.401712
NINL	ENSG00000101004	chr20:25462736-25469880	-0.65355
RAD51D	ENSG00000185379	chr17:33430563-33433405	-0.273223
FAM127B	ENSG00000203950	chrX:134185398-134185947	-0.229663
PPFIA1	ENSG00000131626	chr11:70194526-70196029	0.361155
MMAB	ENSG00000139428	chr12:109998909-109999225	-0.43306
ZNF692	ENSG00000171163	chr1:249152520-249153117	-0.357483
RAPH1	ENSG00000173166	chr2:204306803-204309591	0.334809
PLEKHM2	ENSG00000116786	chr1:16046415-16051812	0.354676
DNM1	ENSG00000106976	chr9:131009765-131010862	0.409202
ABI2	ENSG00000138443	chr2:204267457-204276008	0.226921
PTPRF	ENSG00000142949	chr1:44058272-44063419	-0.28373
DGKQ	ENSG00000145214	chr4:959317-959716	-0.342423
PDXDC2P	ENSG00000196696	chr16:70024586-70029972	-0.411532
GUK1	ENSG00000143774	chr1:228328064-228333212	0.178448
ACOT9	ENSG00000123130	chrX:23751334-23754036	0.268689
ZNF749	ENSG00000186230	chr19:57947035-57949470	0.22991
ENSG00000242676	ENSG00000242676	chr1:142699432-142705706	0.191198
NQO2	ENSG00000124588	chr6:3012908-3015764	-0.210883
ZNF675	ENSG00000197372	chr19:23837508-23844916	-0.310478
ACSL4	ENSG00000068366	chrX:108939425-108976368	-0.283305
RP11-958N24.2	ENSG00000227827	chr16:16463612-16464003	-0.540374
NGEF	ENSG00000066248	chr2:233791896-233834924	0.48747
TPT1-AS1	ENSG00000170919	chr13:45963955-45964849	-0.281252
INCENP	ENSG00000149503	chr11:61908516-61912454	-0.218046
ING3	ENSG00000071243	chr7:120595678-120604796	-0.39454
IQSEC2	ENSG00000124313	chrX:53296246-53308746	-0.211036
CDA	ENSG00000158825	chr1:20931532-20940335	-0.607067
SEC31A	ENSG00000138674	chr4:83765662-83769957	-0.18842
MTMR4	ENSG00000108389	chr17:56590302-56593941	0.22311
OSMR	ENSG00000145623	chr5:38904605-38905234	0.459682
ALS2CL	ENSG00000178038	chr3:46713258-46713374	0.265442
MMP24-AS1	ENSG00000126005	chr20:33865735-33865812	0.272623
CROCC	ENSG00000058453	chr1:17292614-17294698	0.265641
C21orf58	ENSG00000160298	chr21:47738134-47738699	0.270673
SLC9A5	ENSG00000135740	chr16:67299009-67299991	-0.36164
MFF	ENSG00000168958	chr2:228190143-228193394	0.115897
FAM86EP	ENSG00000251669	chr4:3945099-3949817	-0.318245
DOCK10	ENSG00000135905	chr2:225688364-225695258	-0.308366
COL6A2	ENSG00000142173	chr21:47544834-47545180	-0.281474
MAP3K7	ENSG00000135341	chr6:91246120-91256977	-0.385161
SLC22A18AS	ENSG00000254827	chr11:2909865-2923814	-0.241397
ENSG00000006114	ENSG00000006114	chr17:35937711-35944756	-0.351481
STX18	ENSG00000168818	chr4:4425314-4426891	-0.300384
RNF157	ENSG00000141576	chr17:74169871-74208445	-0.461712
LEPR	ENSG00000116678	chr1:66088664-66095885	0.459164
UAP1L1	ENSG00000197355	chr9:139972738-139972739	0.288186
FANCA	ENSG00000187741	chr16:89805961-89806402	-0.272506
TMEM180	ENSG00000138111	chr10:104229832-104230422	-0.408507
RPL23A	ENSG00000198242	chr17:27047448-27047725	0.14453
ISOC2	ENSG00000063241	chr19:55966697-55967716	0.193791
CTD-2139B15.5	ENSG00000249199	chr5:17369498-17375567	0.305183
TMX2	ENSG00000213593	chr11:57505498-57505826	-0.217034
WHSC1	ENSG00000109685	chr4:1936989-1940178	-0.20558
TGFBR2	ENSG00000163513	chr3:30648469-30686239	-0.240787
AKR1C2	ENSG00000151632	chr10:5046206-5048162	0.223109
BSDC1	ENSG00000160058	chr1:32849649-32852380	0.273475
GPBP1	ENSG00000062194	chr5:56531859-56542127	-0.389413
ARHGEF9	ENSG00000131089	chrX:62917184-62926138	-0.204166
LYRM1	ENSG00000102897	chr16:20914039-20926878	0.473493
TBL1X	ENSG00000101849	chrX:9652228-9656057	-0.237915
ABCD4	ENSG00000119688	chr14:74764772-74766251	-0.129627
PKD1P1	ENSG00000244257	chr16:16419324-16419715	-0.798512
NFKBID	ENSG00000167604	chr19:36388005-36388553	0.224464
BRPF1	ENSG00000156983	chr3:9785585-9786692	-0.21555
RRN3	ENSG00000085721	chr16:15180115-15185172	0.254729
FBXO44	ENSG00000132879	chr1:11715756-11715863	0.437666
ACSF2	ENSG00000167107	chr17:48541655-48548389	-0.210886
MCOLN1	ENSG00000090674	chr19:7594598-7595172	-0.471416
CDCA7	ENSG00000144354	chr2:174228623-174228728	0.192239
POLR2J2	ENSG00000228049	chr7:102306610-102309362	-0.179117
ARHGEF11	ENSG00000132694	chr1:156950278-156954131	-0.240398
CRBN	ENSG00000113851	chr3:3194271-3195108	-0.259224
NEIL2	ENSG00000154328	chr8:11627844-11628955	0.421134
SLC38A6	ENSG00000139974	chr14:61509930-61510168	-0.281038
HKR1	ENSG00000181666	chr19:37813134-37814435	-0.274402
EPHB2	ENSG00000133216	chr1:23111569-23189530	-0.258963
SLC25A44	ENSG00000160785	chr1:156177804-156180031	-0.280955
KIAA1033	ENSG00000136051	chr12:105540924-105543393	-0.204291
PCSK7	ENSG00000160613	chr11:117077876-117078686	-0.676462
ENSG00000138041	ENSG00000138041	chr2:55805478-55806815	0.261131
KRBA1	ENSG00000133619	chr7:149426460-149426578	0.268518
TAGLN	ENSG00000149591	chr11:117070148-117070149	0.564015
FAM69B	ENSG00000165716	chr9:139607180-139612029	-0.458548
REXO1	ENSG00000079313	chr19:1817457-1817706	0.252333
NRBP2	ENSG00000185189	chr8:144917900-144917901	-0.243015
SLC41A1	ENSG00000133065	chr1:205760846-205763998	-0.198584
RP11-43F13.1	ENSG00000188002	chr5:1630681-1632759	0.279845
COG7	ENSG00000168434	chr16:23400407-23403701	-0.299023
ALG10B	ENSG00000175548	chr12:38712260-38713963	-0.309248
DENND5A	ENSG00000184014	chr11:9168698-9171628	-0.323492
IQSEC1	ENSG00000144711	chr3:13004827-13008887	0.396779
HAUS7	ENSG00000213397	chrX:152719966-152721000	-0.236767
PDE8A	ENSG00000073417	chr15:85664245-85666292	-0.285849
MUTYH	ENSG00000132781	chr1:45797521-45797695	-0.243655
RRN3	ENSG00000085721	chr16:15180311-15185172	-0.274036
VPS29	ENSG00000111237	chr12:110936664-110936665	-0.338007
PPIP5K2	ENSG00000145725	chr5:102515889-102520373	-0.615677
THOP1	ENSG00000172009	chr19:2807806-2808241	-0.191854
SETD5	ENSG00000168137	chr3:9439661-9466151	0.115421
ST7L	ENSG00000007341	chr1:113153316-113153317	-0.172041
ATAT1	ENSG00000137343	chr6:30594769-30595237	-0.402278
CAPN2	ENSG00000162909	chr1:223940658-223945071	0.34166
LTBR	ENSG00000111321	chr12:6497671-6497966	-0.277994
UTY	ENSG00000183878	chrY:15418130-15435435	-0.212731
NCAPG2	ENSG00000146918	chr7:158443664-158444985	-0.232795
ASB16-AS1	ENSG00000267080	chr17:42259088-42263933	0.267814
TMEM183A	ENSG00000163444	chr1:202985268-202987609	-0.268209
STAG3L3	ENSG00000174353	chr7:72469313-72469578	-0.291565
ABR	ENSG00000159842	chr17:914103-915086	-0.234935
TIAL1	ENSG00000151923	chr10:121336262-121336592	-0.179899
LACE1	ENSG00000135537	chr6:108798495-108831415	-0.254688
LYRM9	ENSG00000232859	chr17:26206516-26207300	-0.515536
LMBR1L	ENSG00000139636	chr12:49497596-49498231	-0.178267
PXDC1	ENSG00000168994	chr6:3727896-3737313	-0.242631
COG3	ENSG00000136152	chr13:46039345-46050336	-0.44325
LINC00313	ENSG00000185186	chr21:44896631-44897944	0.407389
MRPL50	ENSG00000136897	chr9:104151769-104151770	-0.130503
ZC2HC1A	ENSG00000104427	chr8:79626934-79627456	0.304466
PPCDC	ENSG00000138621	chr15:75336855-75340894	-0.372617
PLEKHA5	ENSG00000052126	chr12:19498822-19499928	0.370867
DDB2	ENSG00000134574	chr11:47238600-47254365	-0.189871
XPR1	ENSG00000143324	chr1:180804181-180832844	0.194722
NME4	ENSG00000103202	chr16:448394-448395	0.170022
RBFOX3	ENSG00000167281	chr17:77097726-77102733	0.317515
PGAP2	ENSG00000148985	chr11:3832654-3844139	-0.399041
SNCG	ENSG00000173267	chr10:88719431-88722361	0.164411
ADRM1	ENSG00000130706	chr20:60878837-60879517	-0.178607
PPP2R5D	ENSG00000112640	chr6:42976213-42976431	-0.155016
ECT2	ENSG00000114346	chr3:172473164-172474773	-0.185415
TECPR1	ENSG00000205356	chr7:97858027-97858351	0.404439
CCDC64	ENSG00000135127	chr12:120509605-120518691	0.268935
EIF4H	ENSG00000106682	chr7:73604248-73609071	-0.204251
TNNT1	ENSG00000105048	chr19:55652670-55653225	-0.166405
SREBF1	ENSG00000072310	chr17:17723835-17726832	0.269532
FANCC	ENSG00000158169	chr9:97869551-97873745	-0.257158
SAT1	ENSG00000130066	chrX:23801826-23801917	-0.168831
SGSM2	ENSG00000141258	chr17:2268635-2274556	-0.208714
NBPF1	ENSG00000219481	chr1:16916496-16918342	-0.291212
RBAK	ENSG00000146587	chr7:5085589-5085886	0.27938
NUTM2B-AS1	ENSG00000225484	chr10:81568588-81574369	-0.2529
C5orf51	ENSG00000205765	chr5:41904569-41907838	-0.33849
BAIAP2L2	ENSG00000128298	chr22:38505215-38506482	-0.450144
MICAL3	ENSG00000243156	chr22:18291703-18293469	-0.174196
PLEKHH1	ENSG00000054690	chr14:68038619-68038852	-0.408881
PLEKHM2	ENSG00000116786	chr1:16046415-16047824	-0.334658
ASMTL	ENSG00000169093	chrX:1537009-1537875	-0.475801
KIRREL	ENSG00000183853	chr1:157963518-158045903	-0.296643
PLEKHA7	ENSG00000166689	chr11:16877258-16877350	0.257674
PIGN	ENSG00000197563	chr18:59828618-59830764	-0.207081
ATP5J2	ENSG00000241468	chr7:99055978-99056770	-0.239478
HSF4	ENSG00000102878	chr16:67201305-67201378	0.346379
COPZ2	ENSG00000005243	chr17:46109599-46110052	-0.316012
ADSSL1	ENSG00000185100	chr14:105205715-105206087	-0.298416
PCSK6	ENSG00000140479	chr15:101853710-101858524	-0.271491
ADPRHL1	ENSG00000153531	chr13:114083407-114088057	-0.357685
FGFR1OP	ENSG00000213066	chr6:167424381-167426996	-0.267293
SCN9A	ENSG00000169432	chr2:167159812-167160748	-0.387845
RPTOR	ENSG00000141564	chr17:78857772-78858808	-0.176126
FOXP1	ENSG00000114861	chr3:71349031-71408301	0.288386
RPTOR	ENSG00000141564	chr17:78854289-78857219	-0.245923
NEIL2	ENSG00000154328	chr8:11627300-11628955	-0.327231
HUWE1	ENSG00000086758	chrX:53589890-53590707	-0.168519
PLXNB1	ENSG00000164050	chr3:48447205-48448230	-0.528625
PPCDC	ENSG00000138621	chr15:75320794-75340894	0.309721
RP4-758J18.2	ENSG00000224870	chr1:1335069-1335538	-0.293607
NUDT19	ENSG00000213965	chr19:33183580-33200091	-0.334852
RABL2A	ENSG00000144134	chr2:114391809-114392628	-0.443234
ADCK4	ENSG00000123815	chr19:41220540-41222492	0.341917
ZNF276	ENSG00000158805	chr16:89795726-89799710	-0.351614
DERA	ENSG00000023697	chr12:16109967-16112763	0.176032
MGAT5B	ENSG00000167889	chr17:74928857-74934070	-0.572479
HMG20B	ENSG00000064961	chr19:3573798-3574381	-0.578635
WRAP73	ENSG00000116213	chr1:3547681-3548030	-0.218582
NUTM2B-AS1	ENSG00000225484	chr10:81568719-81574369	0.264077
FAM177A1	ENSG00000151327	chr14:35515834-35522484	-0.20806
GSTM4	ENSG00000168765	chr1:110199901-110199972	0.225977
POLR2H	ENSG00000163882	chr3:184079934-184080661	0.30918
SEC31B	ENSG00000075826	chr10:102247552-102247784	-0.311509
RHBDD2	ENSG00000005486	chr7:75508578-75511147	-0.178214
TOPBP1	ENSG00000163781	chr3:133371473-133372189	0.211589
SLC22A18	ENSG00000110628	chr11:2924719-2929463	-0.195723
SNRPA1	ENSG00000131876	chr15:101826498-101827113	-0.13225
NCAPD3	ENSG00000151503	chr11:134093376-134093757	0.231206
SLC26A11	ENSG00000181045	chr17:78223086-78225128	-0.331639
TMEM9B-AS1	ENSG00000254860	chr11:8988203-8989386	-0.30199
MYNN	ENSG00000085274	chr3:169491250-169492053	-0.252291
ACOT11	ENSG00000162390	chr1:55072938-55073309	0.543546
ZNF207	ENSG00000010244	chr17:30697101-30700418	-0.263689
TMEM256-PLSCR3	ENSG00000187838	chr17:7296683-7296786	-0.259723
PDE8A	ENSG00000073417	chr15:85632647-85634275	-0.267749
PSIP1	ENSG00000164985	chr9:15469991-15472630	-0.311472
GALNS	ENSG00000141012	chr16:88909237-88923166	-0.194327
SLC16A3	ENSG00000141526	chr17:80186982-80193859	-0.213218
CSNK1E	ENSG00000213923	chr22:38690540-38694791	-0.589257
INVS	ENSG00000119509	chr9:102888831-102988344	-0.227011
CAPRIN2	ENSG00000110888	chr12:30869610-30876193	-0.238666
FUK	ENSG00000157353	chr16:70500857-70501277	-0.460336
DPP7	ENSG00000176978	chr9:140008167-140008317	0.243783
TBX18	ENSG00000112837	chr6:85472466-85486268	0.294076
BTD	ENSG00000169814	chr3:15643401-15676931	-0.511565
ENDOV	ENSG00000173818	chr17:78403631-78409933	-0.262819
NUCB2	ENSG00000070081	chr11:17359081-17370892	0.131314
ZNF783	ENSG00000204946	chr7:148959448-148963426	0.396235
PXN-AS1	ENSG00000255857	chr12:120647737-120650178	-0.624007
RBM5	ENSG00000003756	chr3:50137484-50140516	0.341732
FN1	ENSG00000115414	chr2:216257926-216259251	0.159643
PPP1R8	ENSG00000117751	chr1:28157757-28157758	0.192469
ARPC4-TTLL3	ENSG00000250151	chr3:9874957-9876365	-0.210651
CCDC150	ENSG00000144395	chr2:197590823-197593917	0.377701
PIF1	ENSG00000140451	chr15:65112218-65113181	0.239403
ENSG00000174093	ENSG00000174093	chr17:36361953-36361954	-0.143325
MLLT4	ENSG00000130396	chr6:168366725-168369794	-0.531612
RBFOX2	ENSG00000100320	chr22:36206051-36236239	-0.11412
ACOT8	ENSG00000101473	chr20:44477314-44483798	-0.609595
DUSP18	ENSG00000167065	chr22:31048284-31059391	0.695411
BOK	ENSG00000176720	chr2:242501891-242509540	-0.48354
PCSK7	ENSG00000160613	chr11:117077876-117078686	-0.696305
SLC25A23	ENSG00000125648	chr19:6442170-6444162	-0.460066
ITGA6	ENSG00000091409	chr2:173362828-173366500	-0.214262
CMPK1	ENSG00000162368	chr1:47834287-47838627	-0.321411
C11orf49	ENSG00000149179	chr11:47008861-47073939	-0.178698
RASSF8-AS1	ENSG00000246695	chr12:26108174-26109160	-0.448041
ZRANB2	ENSG00000132485	chr1:71531435-71531436	-0.185006
ARSK	ENSG00000164291	chr5:94891108-94901702	0.285996
NISCH	ENSG00000010322	chr3:52512298-52512389	-0.214667
MAN2A2	ENSG00000196547	chr15:91455509-91455772	-0.122737
L3MBTL2	ENSG00000100395	chr22:41613206-41615423	-0.70353
BOLA1	ENSG00000178096	chr1:149871225-149871563	-0.285384
FAM228B	ENSG00000219626	chr2:24347330-24350555	0.388444
NDEL1	ENSG00000166579	chr17:8363478-8366638	-0.194793
BX255923.2	ENSG00000204790	chr9:69240059-69245076	0.293353
TMEM145	ENSG00000167619	chr19:42822033-42824469	-0.527451
PITPNM2	ENSG00000090975	chr12:123485025-123485325	0.313558
FAM177A1	ENSG00000151327	chr14:35516160-35519239	0.366474
CALM2	ENSG00000143933	chr2:47397903-47399553	-0.328911
LRRC27	ENSG00000148814	chr10:134151199-134158002	0.326355
PIGN	ENSG00000197563	chr18:59828618-59830764	-0.463641
GOLGA8B	ENSG00000215252	chr15:34837154-34839136	0.614078
RP11-231C14.4	ENSG00000169203	chr16:29511595-29516794	-0.425505
HNRNPM	ENSG00000099783	chr19:8539128-8548042	-0.23888
ENSG00000197681	ENSG00000197681	chr17:36340198-36340662	-0.482767
P2RX5	ENSG00000083454	chr17:3592053-3592786	-0.192006
DVL1	ENSG00000107404	chr1:1277185-1277433	-0.294644
HDAC11	ENSG00000163517	chr3:13544480-13545594	-0.216194
ANKRD18A	ENSG00000180071	chr9:38540846-38542309	0.263033
PRR4	ENSG00000111215	chr12:11001006-11034816	0.424251
PARPBP	ENSG00000185480	chr12:102589225-102589729	-0.19835
BAIAP2L2	ENSG00000128298	chr22:38494489-38503859	-0.36091
KIFC3	ENSG00000140859	chr16:57806200-57828911	0.179859
NAPA	ENSG00000105402	chr19:48006759-48018100	-0.216917
RP1-283E3.8	ENSG00000268575	chr1:1636094-1636343	-0.319725
RAB40B	ENSG00000141542	chr17:80616589-80617456	-0.133087
TCIRG1	ENSG00000110719	chr11:67810498-67810499	0.280989
ENSG00000141140	ENSG00000141140	chr17:34888511-34889780	-0.223468
CD46	ENSG00000117335	chr1:207941168-207943666	0.233468
FRYL	ENSG00000075539	chr4:48503750-48507564	-0.34166
ZNF638	ENSG00000075292	chr2:71607695-71620524	0.525602
XRRA1	ENSG00000166435	chr11:74554498-74554899	-0.335875
ZNF134	ENSG00000213762	chr19:58125871-58131528	0.461262
PXN-AS1	ENSG00000255857	chr12:120647737-120650178	-0.287791
G2E3	ENSG00000092140	chr14:31071337-31077094	0.245543
CD151	ENSG00000177697	chr11:833026-836063	-0.248579
BCL2L2-PABPN1	ENSG00000258643	chr14:23777408-23788944	-0.13269
CELSR2	ENSG00000143126	chr1:109812755-109813048	-0.515282
PLCB4	ENSG00000101333	chr20:9382237-9383648	0.325593
AC002116.7	ENSG00000267698	chr19:36510286-36536611	-0.36847
C2orf74	ENSG00000237651	chr2:61385147-61389977	0.247467
SAMD11	ENSG00000187634	chr1:876686-877516	-0.269402
GYS1	ENSG00000104812	chr19:49490642-49494559	-0.177202
GEMIN7	ENSG00000142252	chr19:45582635-45593365	0.294819
CLK1	ENSG00000013441	chr2:201724469-201724848	0.13214
NFKB1	ENSG00000109320	chr4:103422945-103450993	0.257895
SLC22A18	ENSG00000110628	chr11:2930940-2937852	-0.369762
IMPDH1	ENSG00000106348	chr7:128043808-128045821	-0.314571
KIAA1109	ENSG00000138688	chr4:123237703-123237887	0.4291
LYRM1	ENSG00000102897	chr16:20911857-20926878	-0.345877
ASB9	ENSG00000102048	chrX:15268686-15270376	-0.236889
PDE9A	ENSG00000160191	chr21:44180542-44180935	-0.255559
CEP41	ENSG00000106477	chr7:130038880-130039880	0.341612
KSR1	ENSG00000141068	chr17:25937224-25938520	-0.455647
PKD1	ENSG00000008710	chr16:2155475-2155866	-0.466004
DYNC1I2	ENSG00000077380	chr2:172563887-172571838	-0.252338
PAN2	ENSG00000135473	chr12:56716542-56716846	-0.229828
PTPRS	ENSG00000105426	chr19:5231626-5238930	-0.198453
POMT1	ENSG00000130714	chr9:134378460-134379576	-0.276135
MRPL4	ENSG00000105364	chr19:10369361-10370293	-0.177387
DOCK5	ENSG00000147459	chr8:25126401-25132902	-0.255418
PAQR6	ENSG00000160781	chr1:156214463-156214552	0.228155
LRRFIP2	ENSG00000093167	chr3:37133029-37136283	-0.249158
SPECC1	ENSG00000128487	chr17:20059549-20107646	-0.239945
SMARCD3	ENSG00000082014	chr7:150938480-150938578	0.550775
ELMOD3	ENSG00000115459	chr2:85581952-85582199	-0.286682
ENSG00000198750	ENSG00000198750	chr7:74824253-74867229	-0.634149
PTK2B	ENSG00000120899	chr8:27301788-27303311	-0.229915
RPTOR	ENSG00000141564	chr17:78854289-78857581	0.190301
ZNF276	ENSG00000158805	chr16:89795726-89799710	-0.338639
ENSG00000138041	ENSG00000138041	chr2:55800913-55804451	-0.193493
NAIF1	ENSG00000171169	chr9:130824105-130825653	-0.266435
BAZ1B	ENSG00000009954	chr7:72856510-72856511	-0.112143
PCNXL2	ENSG00000135749	chr1:233120223-233121838	-0.332914
C16orf59	ENSG00000162062	chr16:2510171-2510624	0.239006
CMPK1	ENSG00000162368	chr1:47799788-47834141	-0.344794
HINT1	ENSG00000169567	chr5:130495304-130497722	-0.136093
RASSF7	ENSG00000099849	chr11:563317-563396	0.476165
KCTD13	ENSG00000174943	chr16:29917887-29917888	-0.242852
ALS2CL	ENSG00000178038	chr3:46717176-46717735	-0.320016
DVL1	ENSG00000107404	chr1:1277185-1277433	-0.295794
MXD3	ENSG00000213347	chr5:176734965-176737427	-0.232395
MFN2	ENSG00000116688	chr1:12062160-12064049	-0.300784
HEXDC	ENSG00000169660	chr17:80397589-80398873	-0.621802
RTKN	ENSG00000114993	chr2:74654719-74655395	-0.30375
RP11-334C17.5	ENSG00000262580	chr17:78177764-78179132	-0.557127
THOP1	ENSG00000172009	chr19:2808442-2810302	-0.209478
ATP6V1B1	ENSG00000116039	chr2:71187208-71187685	0.373019
STK36	ENSG00000163482	chr2:219559358-219561313	0.298572
HMGN2	ENSG00000198830	chr1:26800018-26800194	-0.104119
KIAA0319	ENSG00000137261	chr6:24601436-24645855	-0.589202
MGRN1	ENSG00000102858	chr16:4733933-4738797	-0.170224
FIBCD1	ENSG00000130720	chr9:133813602-133813923	0.222598
POLG2	ENSG00000256525	chr17:62476506-62479036	-0.359659
CRYBB2P1	ENSG00000100058	chr22:25855482-25856834	-0.331636
DNASE1	ENSG00000213918	chr16:3707817-3707907	0.232433
ZSWIM7	ENSG00000214941	chr17:15880406-15880560	-0.116562
SERPINB6	ENSG00000124570	chr6:2959576-2969013	0.182381
ANXA11	ENSG00000122359	chr10:81932625-81965099	0.195869
MXD4	ENSG00000123933	chr4:2254249-2259709	-0.400275
FLNB	ENSG00000136068	chr3:58116635-58118535	-0.211264
NINL	ENSG00000101004	chr20:25459842-25460797	-0.54091
TRMT13	ENSG00000122435	chr1:100605267-100605738	-0.202127
NPM1	ENSG00000181163	chr5:170819982-170827157	-0.272211
RPGR	ENSG00000156313	chrX:38136025-38146347	-0.258575
MBNL1	ENSG00000152601	chr3:152165562-152173331	0.149136
PDE8A	ENSG00000073417	chr15:85634146-85634275	0.345972
OSER1-AS1	ENSG00000223891	chr20:42839996-42843528	0.355288
PLOD2	ENSG00000152952	chr3:145794682-145795649	0.336949
SEMA4F	ENSG00000135622	chr2:74884751-74884980	-0.275954
SMARCD3	ENSG00000082014	chr7:150937608-150938578	-0.646348
NT5C3B	ENSG00000141698	chr17:39992209-39992434	-0.227287
MEN1	ENSG00000133895	chr11:64573242-64573704	-0.360832
CTC-360G5.8	ENSG00000269547	chr19:39435744-39437112	-0.3308
ZNF638	ENSG00000075292	chr2:71607695-71623271	-0.164232
STRADA	ENSG00000266173	chr17:61784099-61787851	0.369002
SLC35A3	ENSG00000117620	chr1:100459297-100472590	0.385559
PRKAB2	ENSG00000131791	chr1:146631221-146633291	0.341617
TAPBP	ENSG00000231925	chr6:33269548-33271732	-0.21531
NUDT22	ENSG00000149761	chr11:63994604-63995040	-0.395774
STAT4	ENSG00000138378	chr2:191905874-191919216	0.280877
HACL1	ENSG00000131373	chr3:15624496-15626755	-0.177009
BAZ2B	ENSG00000123636	chr2:160253611-160253856	-0.48998
PRSS53	ENSG00000151006	chr16:31095130-31095440	-0.251503
LHFPL2	ENSG00000145685	chr5:77784976-77805607	-0.244421
MEIS3	ENSG00000105419	chr19:47910685-47912356	-0.238367
PLA2G6	ENSG00000184381	chr22:38511856-38512082	0.308529
NAT14	ENSG00000090971	chr19:55997147-55997775	-0.320748
MAP3K7	ENSG00000135341	chr6:91246120-91256977	-0.355594
NOM1	ENSG00000146909	chr7:156756169-156756170	0.292716
ZNF514	ENSG00000144026	chr2:95823184-95824605	0.454126
ACSF3	ENSG00000176715	chr16:89178654-89180747	-0.479988
EPS8L1	ENSG00000131037	chr19:55591909-55592140	-0.259937
ENTPD6	ENSG00000197586	chr20:25198217-25199186	-0.174947
PCGF6	ENSG00000156374	chr10:105086389-105093682	-0.498273
[truncated: 869 more rows]
