# Supplementary material for: Viral-induced alternative splicing of host genes promotes influenza replication
Source: eLife. 2020 Dec 3;9:e55500. doi: 10.7554/eLife.55500 (PMC7735754; doi:10.7554/eLife.55500)
Supplement: Supplementary file 3. — Sequences are given for siRNAs for screen (page 1), primers for RT-PCR (page 2), splice-blocking AMOs (page 3), primers for qPCR (page 4), and primers for primer extension analysis of IAV (page 5). [file elife-55500-supp3.xlsx]

## Sheet: siRNAs
Gene Symbol	siRNA	Sense siRNA Sequence	Antisense siRNA Sequence
ABCD4	A	CCCUCGUCUACUACACUUAtt	UAAGUGUAGUAGACGAGGGtg
AGAP3	A	GGUUAUCGACGACAGCAGAtt	UCUGCUGUCGUCGAUAACCcg
ARHGAP12	A	GGUAGACAAUAUUACUACAtt	UGUAGUAAUAUUGUCUACCtt
ARL14EP	A	GAAUUGUCAUCAAAUGAUAtt	UAUCAUUUGAUGACAAUUCtt
ASB1	A	GGAGCCGCAUCAACGAGAAtt	UUCUCGUUGAUGCGGCUCCgg
ASXL1	A	GGAAGUCCGUGCUAUGUCAtt	UGACAUAGCACGGACUUCCtt
B4GALT3	A	CACUUACUCCUGACCAGUAtt	UACUGGUCAGGAGUAAGUGct
C1orf52	A	CCUCCAAAGGAAUUCAAAAtt	UUUUGAAUUCCUUUGGAGGct
CBX4	A	AGAUGAAGAUAGUCAAGAAtt	UUCUUGACUAUCUUCAUCUtg
CCNT2	A	CCAUAAUGCUACAAACUCUtt	AGAGUUUGUAGCAUUAUGGtt
CHD2	A	GCGAUUUAAUAUUAAGGAAtt	UUCCUUAAUAUUAAAUCGCga
CLASP1	A	GGUUAUGACAACACCGAAAtt	UUUCGGUGUUGUCAUAACCct
CLK1	A	CAUUUCGACUGGAUCAUAUtt	AUAUGAUCCAGUCGAAAUGgt
CREB1	A	CAUUAGCCCAGGUAUCUAUtt	AUAGAUACCUGGGCUAAUGtg
DNAJB6	A	GAACGGUCAAGAAAGAGUAtt	UACUCUUUCUUGACCGUUCtc
ECHDC2	A	CGGACCAAGGGAUCACUGAtt	UCAGUGAUCCCUUGGUCCGga
EIF4A2	A	GAGACUUUCUACAAUACUAtt	UAGUAUUGUAGAAAGUCUCaa
EIF4H	A	ACAUAGAUGCUAUCUUUAAtt	UUAAAGAUAGCAUCUAUGUcg
EPC1	A	GUCAGAUACUAGUCAAUAUtt	AUAUUGACUAGUAUCUGACtg
ERI2	A	GGACGAUUCUCGGAAUACUtt	AGUAUUCCGAGAAUCGUCCaa
FAM189B	A	GCUAUAAUCUGUACACUCUtt	AGAGUGUACAGAUUAUAGCgg
FBXO22	A	GACAACCUGUCAUCACUGAtt	UCAGUGAUGACAGGUUGUCca
GPBP1	A	GCAUGGACAGAGAAUCGUUtt	AACGAUUCUCUGUCCAUGCaa
GRAMD1A	A	GGAGCGGCAUUGAAGACUAtt	UAGUCUUCAAUGCCGCUCCac
HEATR3	A	GUCUUUCAGUGCUACAGCAtt	UGCUGUAGCACUGAAAGACtt
IP6K2	A	GAACAUCAGUUCUACGAGAtt	UCUCGUAGAACUGAUGUUCcc
IQCB1	A	GAGAAGCUCUGAUAGCACAtt	UGUGCUAUCAGAGCUUCUCtg
LDLR	A	GGACAGAUAUCAUCAACGAtt	UCGUUGAUGAUAUCUGUCCaa
MANBA	A	CGAGAUAGUGGAUCAGCAAtt	UUGCUGAUCCACUAUCUCGct
MGAT5B	A	ACAAAUACAUGGAGAUCCAtt	UGGAUCUCCAUGUAUUUGUtc
NCOR2	A	GCGAUGCGGAAGAAGCUAAtt	UUAGCUUCUUCCGCAUCGCct
NR1D2	A	GGUUUGGUCGUAUUCCUAAtt	UUAGGAAUACGACCAAACCga
PALLD	A	GGGACAGUGGAGACGAAAAtt	UUUUCGUCUCCACUGUCCCtt
PANK1	A	GCAACAUGAUGAGUAAAGAtt	UCUUUACUCAUCAUGUUGCca
PAXBP1	A	CUAUUGAUUUGGUAAAGAAtt	UUCUUUACCAAAUCAAUAGta
PDE8A	A	GGCUGAGAAAAUAUCCGAAtt	UUCGGAUAUUUUCUCAGCCtt
PEX1	A	GGUUGUUCCUCUAGACAAUtt	AUUGUCUAGAGGAACAACCtt
POM121	A	CCUCAAUUCUCAGAGCUCAtt	UGAGCUCUGAGAAUUGAGGcc
PPIP5K2	A	GGAUUAUGCUCGUACUCAUtt	AUGAGUACGAGCAUAAUCCtg
PTHLH	A	GGCGACGAUUCUUCCUUCAtt	UGAAGGAAGAAUCGUCGCCgt
RAB11FIP3	A	AGGUGAAGGACUUAACUAAtt	UUAGUUAAGUCCUUCACCUgc
RASA2	A	CUAACUUUGUAAUCGAGGAtt	UCCUCGAUUACAAAGUUAGaa
REPIN1	A	AGUCCAACCUGGUGUCGCAtt	UGCGACACCAGGUUGGACUtc
RIPK4	A	GCACGAUGUAUACAGCUUUtt	AAAGCUGUAUACAUCGUGCtt
RWDD3	A	GUAUCUCGAUUAACUCUGAtt	UCAGAGUUAAUCGAGAUACca
SETD5	A	GGAGUACCGAAAACGGAAAtt	UUUCCGUUUUCGGUACUCCag
SETX	A	GGUCGAUAAUACUAUCAAUtt	AUUGAUAGUAUUAUCGACCaa
SLC25A36	A	GCAUCAGAUUUUGUGGGAAtt	UUCCCACAAAAUCUGAUGCtt
SMEK1	A	GAAGAGAUGUGGUUUAACAtt	UGUUAAACCACAUCUCUUCtt
SNX4	A	CAAGCUCUUUGGUCAAGAAtt	UUCUUGACCAAAGAGCUUGgt
STRN3	A	GGUUUAGCUGCUGACCUAAtt	UUAGGUCAGCAGCUAAACCtt
TNRC6A	A	GUCGCAAAAUGGAGAUUGAtt	UCAAUCUCCAUUUUGCGACgt
TRIM11	A	CUAUUACAAUUCCUCGGAAtt	UUCCGAGGAAUUGUAAUAGct
TSEN54	A	GGAUGUGCAUUAGUGGAUUtt	AAUCCACUAAUGCACAUCCgg
VEZF1	A	GGGUGCACCAGAAACAUUAtt	UAAUGUUUCUGGUGCACCCtg
YTHDF1	A	GCUCAACCGCAGUAUCAGAtt	UCUGAUACUGCGGUUGAGCca
ABCD4	B	GACUUGGAAGGGUUUAAGAtt	UCUUAAACCCUUCCAAGUCtt
AGAP3	B	AGCUCUCCACAGAUCUGAAtt	UUCAGAUCUGUGGAGAGCUtg
ARHGAP12	B	GGUCAGACUGUCAACCUAAtt	UUAGGUUGACAGUCUGACCtt
ARL14EP	B	GGUUCAGACAGACAAGUGAtt	UCACUUGUCUGUCUGAACCag
ASB1	B	GGAGCAAUUUUGUGAUCAUtt	AUGAUCACAAAAUUGCUCCct
ASXL1	B	GCUACGCAUGGGAUCUUUAtt	UAAAGAUCCCAUGCGUAGCga
B4GALT3	B	CCGUUGCUAUGAACAAGUUtt	AACUUGUUCAUAGCAACGGca
C1orf52	B	CUACAAUCCGCUCAACAAAtt	UUUGUUGAGCGGAUUGUAGag
CBX4	B	UGAUCGUGAUGAGCAAAUAtt	UAUUUGCUCAUCACGAUCAcg
CCNT2	B	CGAUGUAAGGGAUCAUUAUtt	AUAAUGAUCCCUUACAUCGag
CHD2	B	CGAAUCAGCAGGUUCCAAAtt	UUUGGAACCUGCUGAUUCGct
CLASP1	B	GGAUGUAUUCUGACGAUGAtt	UCAUCGUCAGAAUACAUCCca
CLK1	B	CUAUCUUGGGUUUACCGUAtt	UACGGUAAACCCAAGAUAGta
CREB1	B	CCGUAACUCUAGUACAGCUtt	AGCUGUACUAGAGUUACGGtg
DNAJB6	B	GUUAAAGUCCUUAACAAUAtt	UAUUGUUAAGGACUUUAACtg
ECHDC2	B	GCUUCACCCUGGCUAGAAAtt	UUUCUAGCCAGGGUGAAGCta
EIF4A2	B	GAGCCGUGGUUUUAAGGAUtt	AUCCUUAAAACCACGGCUCaa
EIF4H	B	GGAAAUCUACCUUUCAAUAtt	UAUUGAAAGGUAGAUUUCCta
EPC1	B	CCUCAGUAGUACUACACCAtt	UGGUGUAGUACUACUGAGGtg
ERI2	B	GCAUGCUUUUCUUAAGCAAtt	UUGCUUAAGAAAAGCAUGCtg
FAM189B	B	CAGGGACCUUUAUACCAAAtt	UUUGGUAUAAAGGUCCCUGaa
FBXO22	B	CAAUCGACCUCAGGAAAUAtt	UAUUUCCUGAGGUCGAUUGct
GPBP1	B	GGAAGUUCCCGUUCUCGUAtt	UACGAGAACGGGAACUUCCac
GRAMD1A	B	GAAGUGACAUGUCUGAAGAtt	UCUUCAGACAUGUCACUUCct
HEATR3	B	GUGACGCAUUUAUGGAGAAtt	UUCUCCAUAAAUGCGUCACtt
IP6K2	B	GCGUGCUCCGCUUCAAUGAtt	UCAUUGAAGCGGAGCACGCat
IQCB1	B	CCUGAGCUCUUCCUAAGUAtt	UACUUAGGAAGAGCUCAGGtt
LDLR	B	GGACAAAUCUGACGAGGAAtt	UUCCUCGUCAGAUUUGUCCtt
MANBA	B	GGACAGUGGAACUUAUAGAtt	UCUAUAAGUUCCACUGUCCta
MGAT5B	B	GCACCGAGUCGGAGAUGAAtt	UUCAUCUCCGACUCGGUGCtg
NCOR2	B	CAGCAGAUCUCUAAGCUGAtt	UCAGCUUAGAGAUCUGCUGct
NR1D2	B	CGAAUAGAUUGUUCUAUGAtt	UCAUAGAACAAUCUAUUCGat
PALLD	B	GCACCCUAGUUAUCGCUGAtt	UCAGCGAUAACUAGGGUGCaa
PANK1	B	CGCGUUGAAUGAGAACAUAtt	UAUGUUCUCAUUCAACGCGca
PAXBP1	B	GAAUGUUCUUCGUCCAGGAtt	UCCUGGACGAAGAACAUUCaa
PDE8A	B	GGACCCUAAUCAAACGAAUtt	AUUCGUUUGAUUAGGGUCCgg
PEX1	B	CUGUUUGGGUUGAUCAACAtt	UGUUGAUCAACCCAAACAGga
POM121	B	GCCCAUCCAUCCUAUCUUUtt	AAAGAUAGGAUGGAUGGGCgt
PPIP5K2	B	GGAUGAACAGUGGAAACGAtt	UCGUUUCCACUGUUCAUCCtt
PTHLH	B	CGUCCGAUUUGGGUCUGAUtt	AUCAGACCCAAAUCGGACGgg
RAB11FIP3	B	GAGAGGCACCAGUUCCAGAtt	UCUGGAACUGGUGCCUCUCgt
RASA2	B	GAAGUAACCAGAUCCAGUAtt	UACUGGAUCUGGUUACUUCaa
REPIN1	B	AGCCCUAUCUGACUUCGCAtt	UGCGAAGUCAGAUAGGGCUta
RIPK4	B	UGGGAUCUCCGGUUCCGAAtt	UUCGGAACCGGAGAUCCCAtg
RWDD3	B	GGAUUUAUGGAUGCGGAUAtt	UAUCCGCAUCCAUAAAUCCtt
SETD5	B	CAAACACUACAUUCGCUUUtt	AAAGCGAAUGUAGUGUUUGgg
SETX	B	GGACCAAGUUAGAACCGGAtt	UCCGGUUCUAACUUGGUCCtt
SLC25A36	B	CAGAGACUGUUAUCCAUUUtt	AAAUGGAUAACAGUCUCUGat
SMEK1	B	GGAUCCCGCUACAAUCUGAtt	UCAGAUUGUAGCGGGAUCCat
SNX4	B	GCGACGGAUUGGUUUAGAAtt	UUCUAAACCAAUCCGUCGCct
STRN3	B	CUGACGAUCCUGAUACUGAtt	UCAGUAUCAGGAUCGUCAGtt
TNRC6A	B	GCAACUUCCCUAUAGGCUUtt	AAGCCUAUAGGGAAGUUGCtg
TRIM11	B	UGCUAUUCAUCUUUCCCGAtt	UCGGGAAAGAUGAAUAGCAgt
TSEN54	B	UGUCUAUCCAGGAAGCUUAtt	UAAGCUUCCUGGAUAGACAgt
VEZF1	B	CCACUUAAGCUGUCAUGUAtt	UACAUGACAGCUUAAGUGGtc
YTHDF1	B	CGUCCAUUGGAUUUCCUUAtt	UAAGGAAAUCCAAUGGACGgc

## Sheet: RT-PCR
Gene name	F-primer	R-primer
CLK1	GACCATGAAAGCCGGTATCAGAACC	GCTTTATGATCGATGCACTCCACAAC
RAB11FIP3	GCGAGGAGCACTTTGAGGACTACGG	CTTGCTGGAGAGCCGCTTTGTCGG
PPIP5K2	CGAGCTGTGATATTGTTTAAACCAATGG	CTGCTTCTGTTCCACAAGAGTTCTTGG
CREB1	GCAGACAGTTCAAGTCCATGGAGTC	GAATCAGTTACACTATCCACTGACTCC
IQCB1	CGAGAATTGCAGCTGAGTATGCTCG	CCACTCGTTTCTTCAGTTCAACTCGG
REPIN1	CAGGAACATCCCCAAGAGGAGCTGG	CAGGGAAGTGCCTTCGACAGTGGG
ASXL1	GCTGCCTCGAGTTGTCCTGACTCC	GGAAGGTCCGAGAGTTGATCAGGG
C1orf52	CGAGCTGTTTAGGAGCGTGACTCG	GGAGGCTTCTTCTCAGTGGTGTAGG
FBXO22	GAGCACCTTCGTGTTGAGTAACCTGG	CATGTAAAGAACTGTATGTGGTAAGATGC
PAXBP1	CGCCTTGTCCAAAGACGACAAGATG	GAGTCAAGATTTGGTGCCATCAGAGC

## Sheet: AMO
Gene name	Sequence
CLK1	TCTGGAAACGTCAAGTGGGCGGCAC
RAB11FIP3	TGCTAGAGAGACAGAAGCATCCGTT
PPIP5K2	GCTCTCTTCTTGGAAGTGAGAAAGG
ERI2	ACCTGAAAGAAGAGGATGTTTCCCC
CREB1	GGACCTAGGACTCACCTGTGTTC
IQCB1	TTCACTACATTAGACTCACTGCTCT
REPIN1	CTGCCACAGGACTCACCAGAAAATG

## Sheet: qPCR
Gene name	F-primer	R-primer
IAV PA vRNA	CCGAGAAGCATTAAGCAAAACCAG	GCTTCTTATCGTTCAGGCTTTAGG
GAPDH	GGTATCGTGGAAGGACTCATGAC	ATGCCAGTGAGCTTCCCGTTCAG
IFIT1	CCTGAAAGGCCAGAATCAGGAAGCC	GCACCTTTTCAAAGCAGGCCTTGGC
CREB1	GGAGGCCTTCCTACAGGAAAAT	GCTGTATTGCTCCTCCCTGG
CLK1	ATTTTGTTGTTGGTGCGCGA	CCTGGGCACTGCTATGTGAT
RAB11FIP3	TCTTCCTGGAAAGGCGTGTG	CTTCCAGGACCATCTCGCAG
PPIP5K2	GGCTTTCGAAGGCATTAGCAG	GTCCTCTGAAGGTCTGAGCG
REPIN1	GACCAGCTAGTTGCCCACAA	TGAGCGATCAAGTTGGGCTT
IQCB1	GGAGCCCCAGGTTCTTTAGTG	GCTCAGGGCTTTTTGCAACT
PALLD	ACCTCACTTCTTGCAGGCTC	AGTTCTGTCCTGCTCGGTTG
C1orf52	CCTCCTGAGACCTACACCACT	CCTGGCTCTACTTTGCGCTT
B4GALT3	TCGGAGGAGTCTCAGCACTT	CTCCTCGGTGCTTCACCATC
EIF4H	TCAATACGGTTCAGGGCGAC	GTCCACACGAAGTGACCGAT
ERI2	ATGGGAAGCACCACCATAGC	AGCCTGCTTTATGCCTGTCA
hnRNP_L	CCGGAACAATCGGTTCTCCA	TTTCACAGAAGATGGCCGCT
hnRNP_K	ATTTCCCATGCGGGGAAGAG	TCGTAACGGTCTCCAGGTCT
Actin	CCCTGGCATTGCCGACAGG	GCCGATCCACACGGAGTACT

## Sheet: Extension Primers
Position	Sequence
903	gtatttaaagcgacgataaatgcatttg
106	gtctctgtgcgatctcggc
U1	TCAGCACATCCGGAGTGCAATGG
