# Supplementary figures and images for: Viral-induced alternative splicing of host genes promotes influenza replication
Source: eLife journal article supplement (doi:10.7554/elife.55500), 2020-12-03

Figure 6- supplement 1

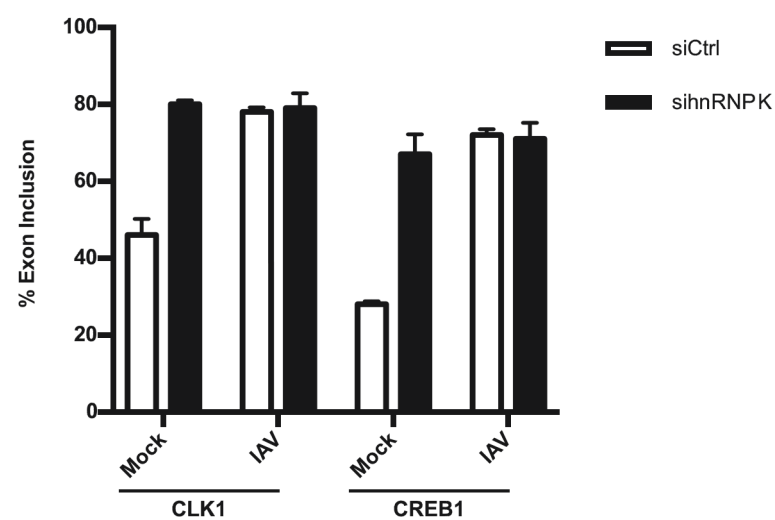

Supplement: supp [file elife-55500-supp-v1.zip]

Figure 2- supplement 1

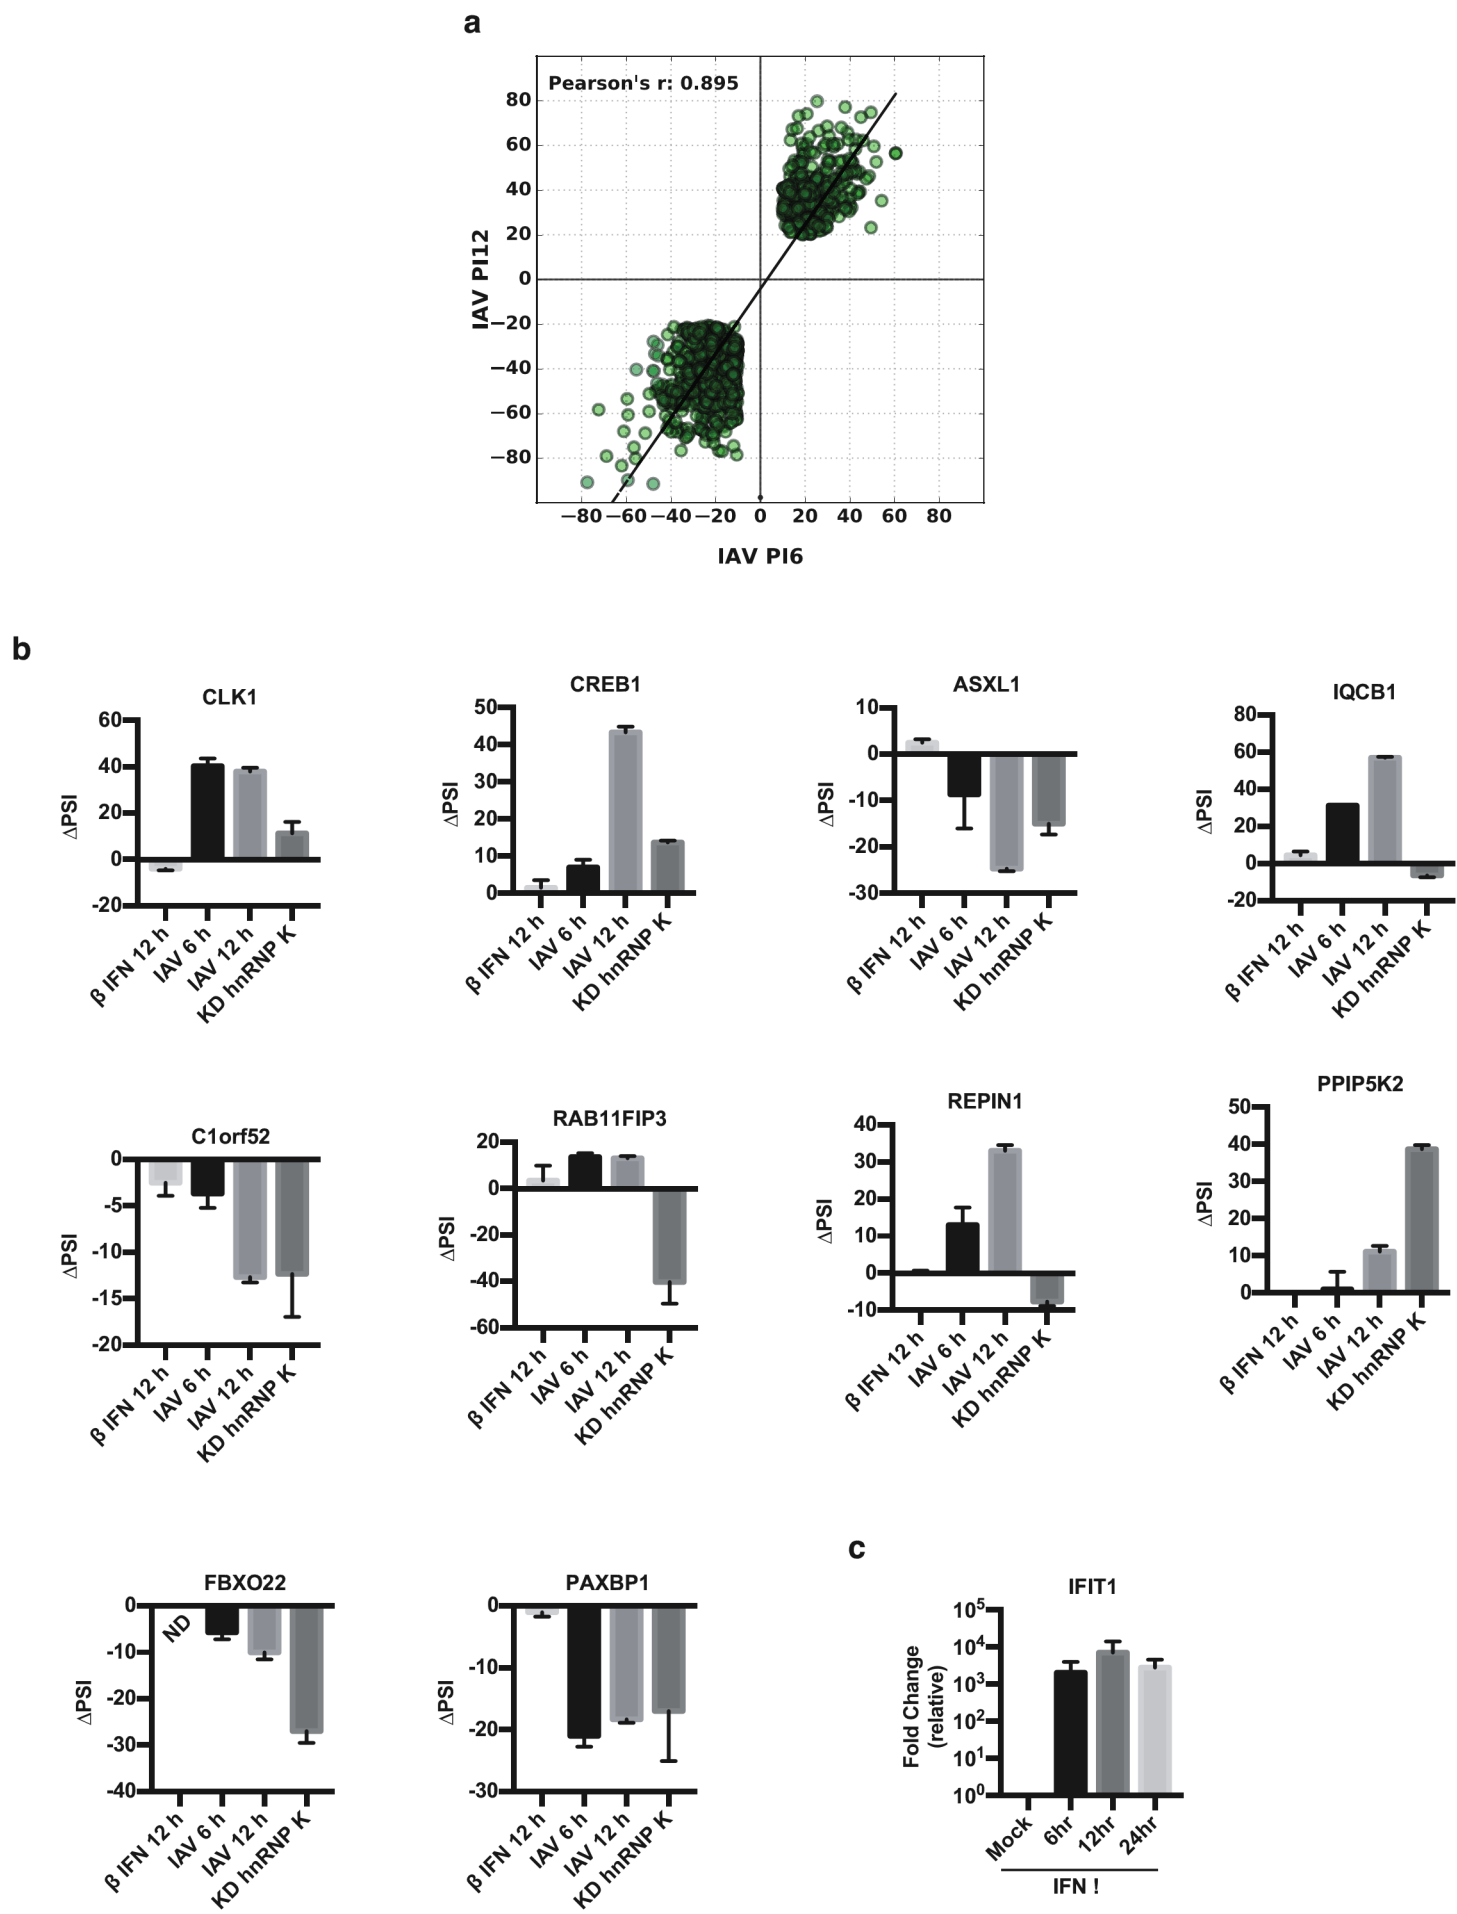

Supplement: supp [file elife-55500-supp-v1.zip]

Figure 1- supplement 1

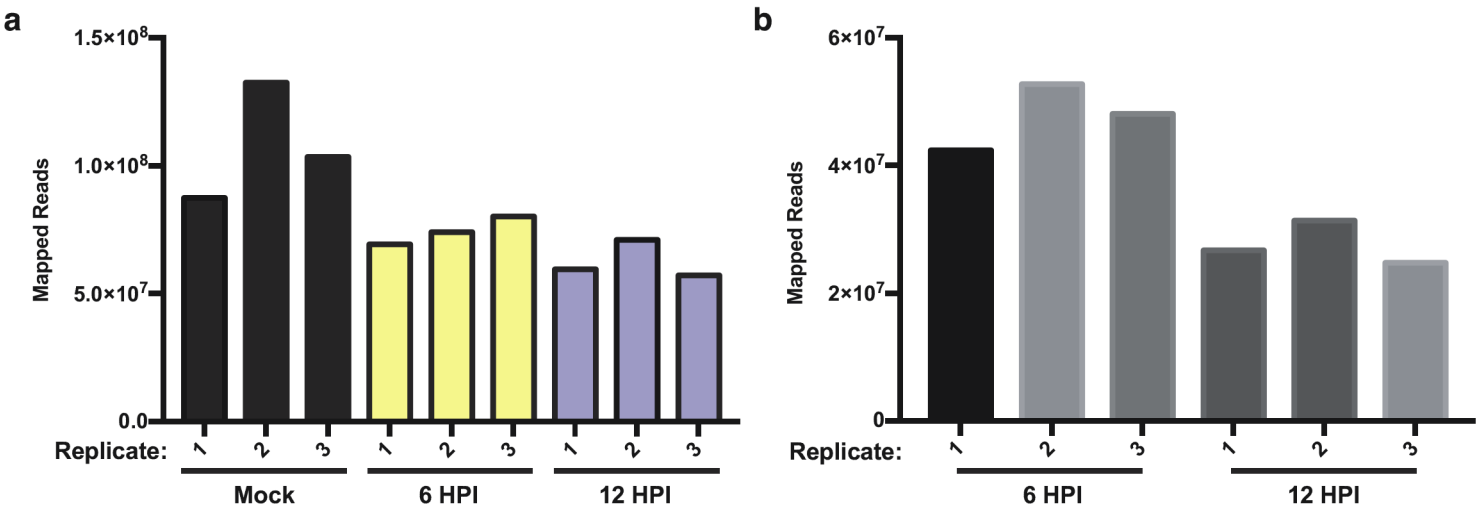

Supplement: supp [file elife-55500-supp-v1.zip]

Figure 3- supplement 1

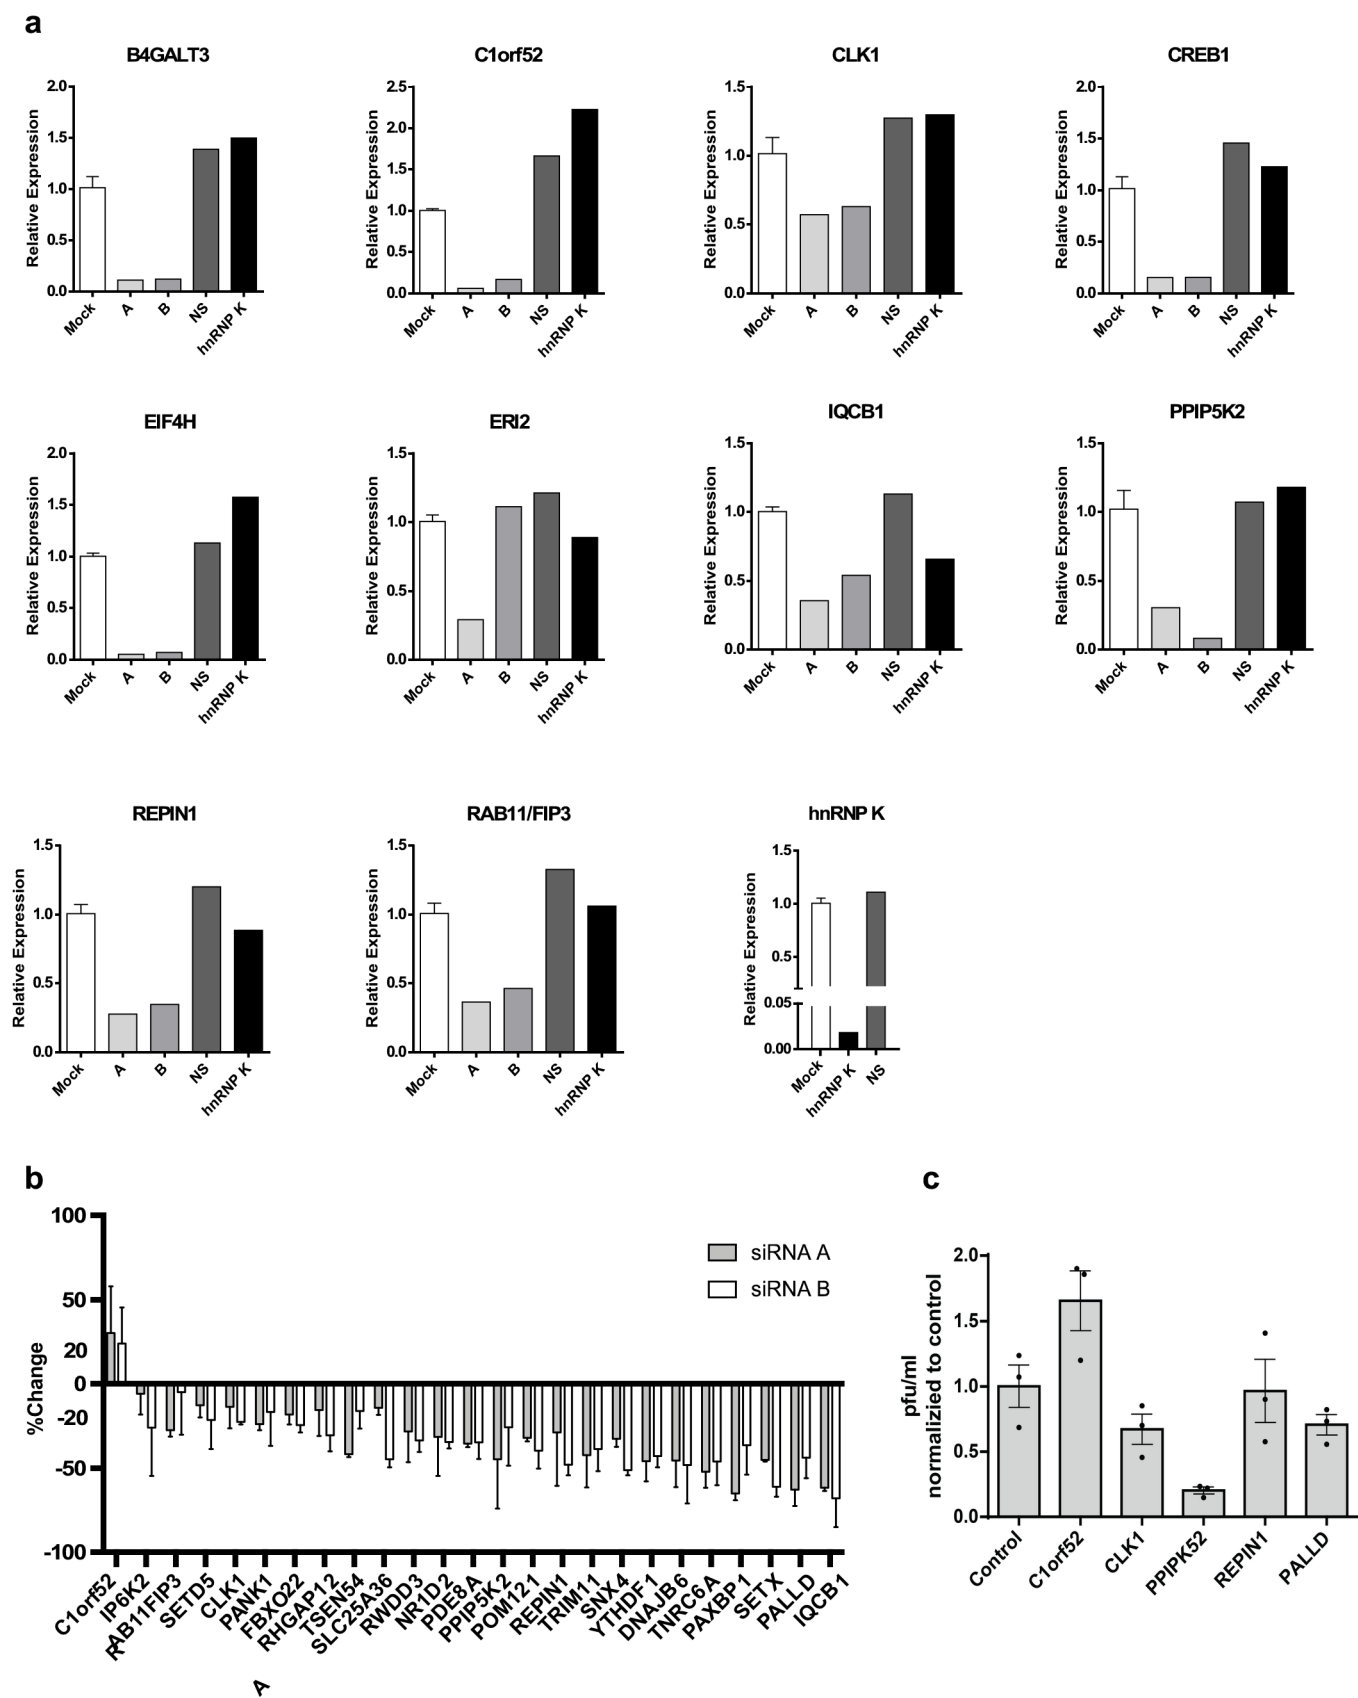

Supplement: supp [file elife-55500-supp-v1.zip]

Figure 5- supplement 1

**a**

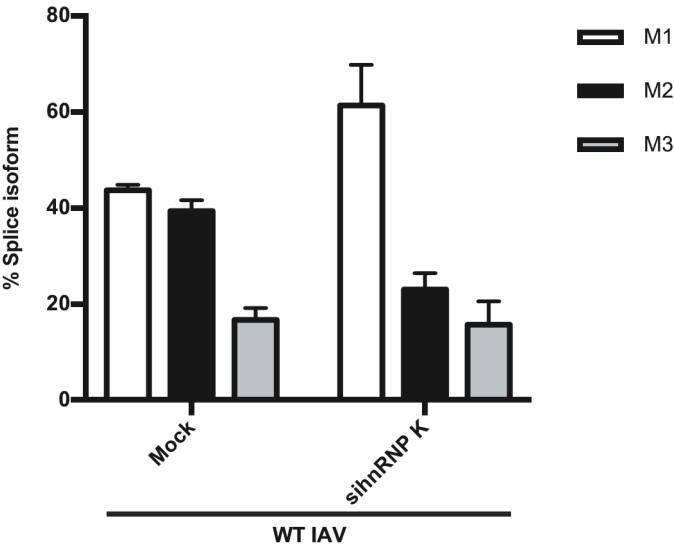

**b**

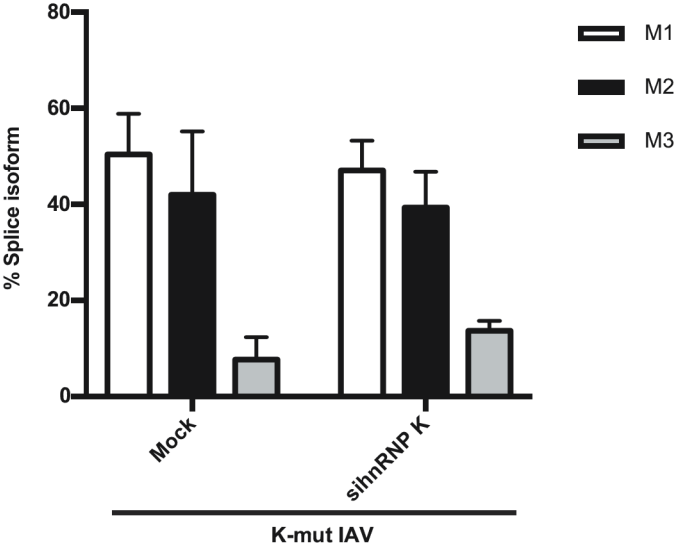

Supplement: supp [file elife-55500-supp-v1.zip]

Figure 5- supplement 2

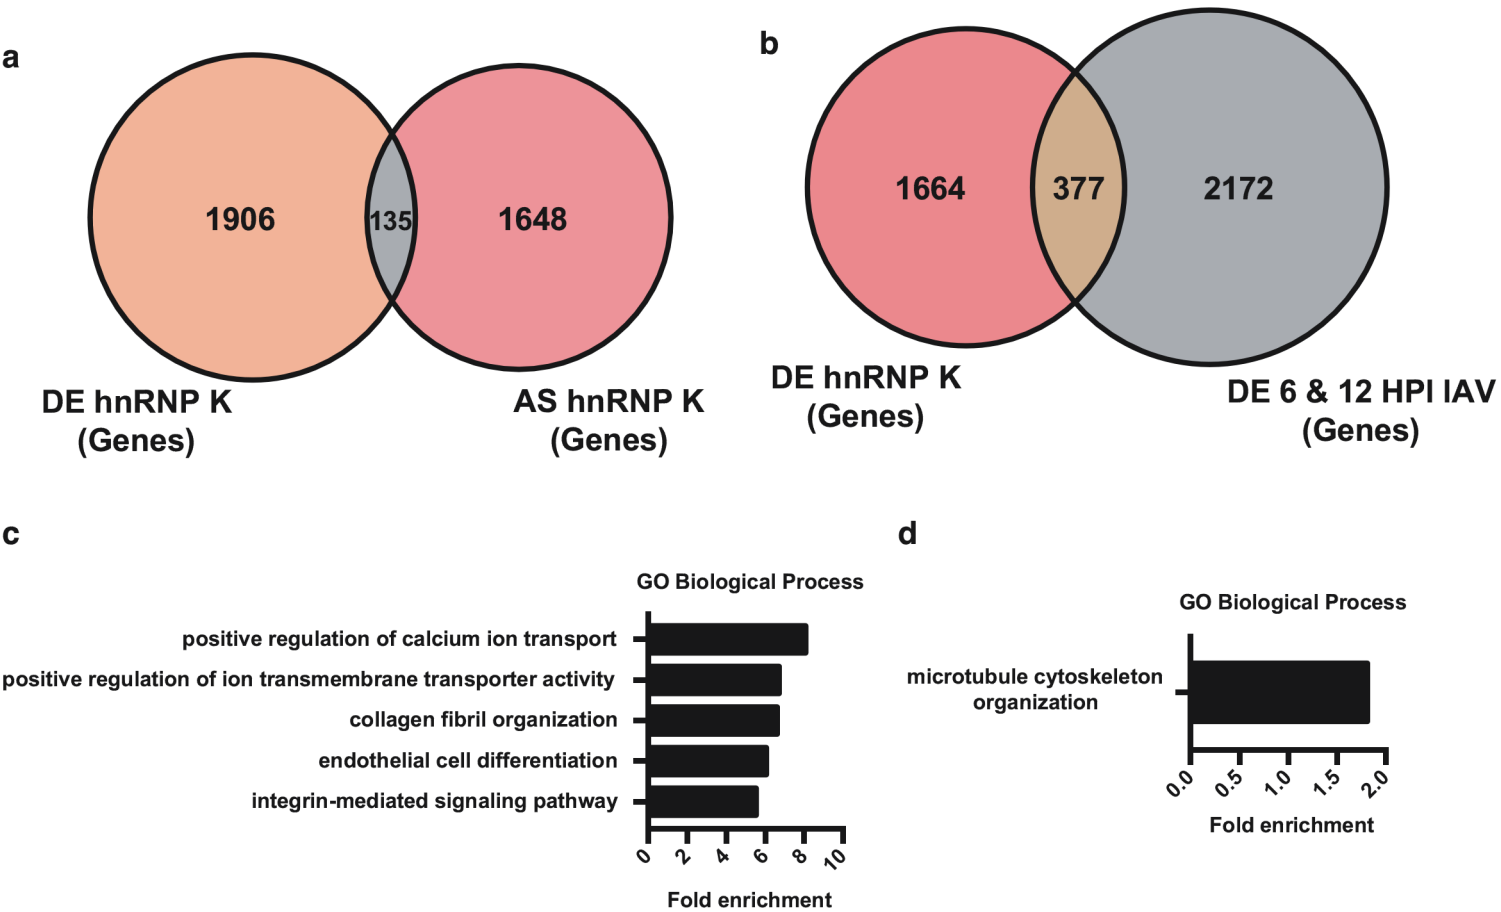

Supplement: supp [file elife-55500-supp-v1.zip]

Figure 4- supplement 1

**a**

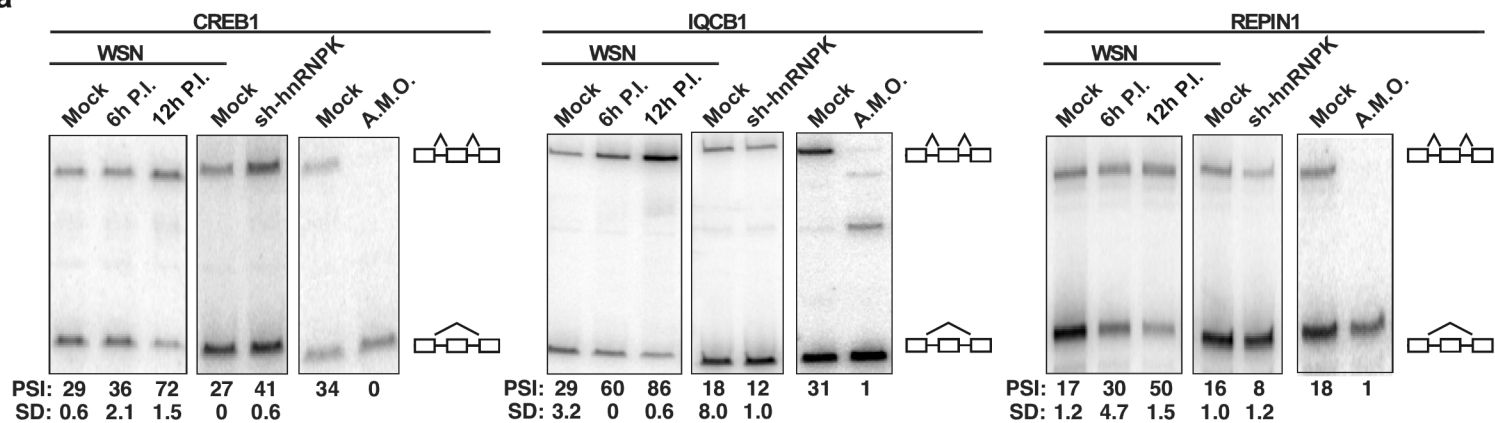

**b**

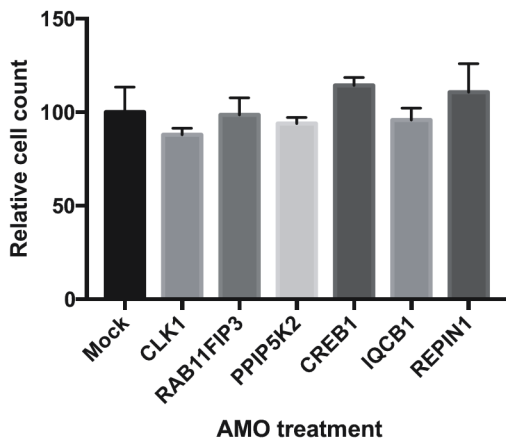

**c**

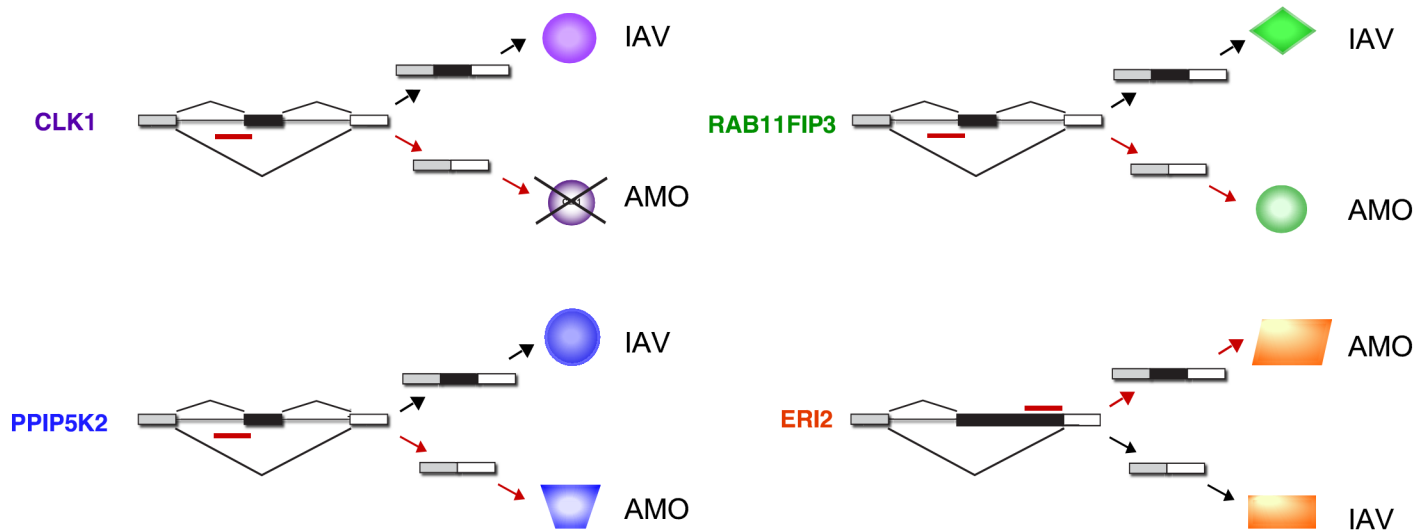

Supplement: supp [file elife-55500-supp-v1.zip]
